# Supplementary material for: Uncertainty-aware machine learning to predict non-cancer human toxicity for the global chemicals market
Source: Research Square preprint supplement (doi:10.21203/rs.3.rs-6103978/v1), 2025-03-06
Supplement: Supplementary file 1 [file f715a808d17bfe04b4d0662f.xlsx]

## Sheet: INFO
	Supplemental information 2
	Uncertainty-aware machine learning to predict non-cancer human toxicity for the global chemical market
	Kerstin von Borriesa, Katie Beckwithb, Jonathan Goodmanb, Weihsueh Chiuc, Olivier Jollieta and Peter Fantked,e
	aQuantitative Sustainability Assessment, Department of Environmental and Resource Engineering, Technical University of Denmark, Bygningstorvet 115, 2800 Kgs. Lyngby, Denmark
	bCentre for Molecular Informatics, Department of Chemistry, University of Cambridge, Lensfield Road, Cambridge CB2 1EW, United Kingdom
	cDepartment of Veterinary Physiology and Pharmacology, Texas A&M University, 4466 TAMU, College Station, TX 77843-4466, United States of America
	dsubstitute ApS, Graaspurvevej 55, 2400 Copenhagen, Denmark
	eDepartment for Evolutionary Ecology and Environmental Toxicology, Goethe University, 60438 Frankfurt am Main, Germany
	Number of pages: 3
	Number of figures: 0
	Number of tables: 4
	Contents
	Table S2-1. Prediction results for 126,060 standardized marketed chemicals obtained with CP models trained with "standardized" data set
	Table S2-2. Preliminary prediction results for 8,054 diverse marketed chemicals obtained with CP models trained with "full" data set

## Sheet: S2-1
general chemical information													reproductive/developmental points of departure (PODrd)						general non-cancer points of departure (PODnc)
INCHIKEY	SMILES (original)	Salt_Solvent	SMILES (standardized)	CASRN	CHEMICAL NAME	MW	TSNE1	TSNE2	Kingdom	Superclass	Class	Subclass	reported PODrd (training) [log10 mg/kg-d]	reported PODrd (all) [log10 mg/kg-d]	predicted PODrd [log10 mg/kg-d]			Jaccard distance	reported PODnc (training) [log10 mg/kg-d]	reported PODnc (all) [log10 mg/kg-d]	predicted PODnc [log10 mg/kg-d]			Jaccard distance
	canonical SMILES before standardization	stripped during standardization	after applying Mansouri et al. (2018) standardization protocol			[g/mol]	T-SNE coordinate	T-SNE coordinate	ClassyFire taxonomy	ClassyFire taxonomy	ClassyFire taxonomy	ClassyFire taxonomy	considering standardized SMILES	considering original SMILES., including PODs with <4 data points	median	2.5% bound	97.5% bound	from 5 nearest training chemicals	considering standardized SMILES	considering original SMILES., including PODs with <4 data points	median	2.5% bound	97.5% bound	from 5 nearest training chemicals
AAADKYXUTOBAGS-UHFFFAOYSA-N	CC1(C)C2CC(=S)C1(C)CC2		CC1(C)C2CC(=S)C1(C)CC2	7519-74-6	Thiocamphor	168.305	111.002	86.7546	Organic compounds	Lipids and lipid-like molecules	Prenol lipids	Monoterpenoids			0.978892	-1.41235	2.33078	0.669722			0.662764	-3.28952	2.17885	0.66294
AAAHTTDMVMAHMO-UHFFFAOYSA-N	O[B-](C1C=CC=CC=1)(C1C=CC=CC=1)C1C=CC=CC=1		O[B-](C1C=CC=CC=1)(C1C=CC=CC=1)C1C=CC=CC=1	40905-43-9	Hydroxy(triphenyl)borate(1-)	259.137	-62.1633	-79.2437	Organic compounds	Benzenoids	Benzene and substituted derivatives				1.36711	-3.51629	2.41699	0.622601			1.05595	-1.44261	2.57493	0.618679
AAAIZLQILBFRTJ-UHFFFAOYSA-N	CCCCCCCCCCCCCCCOC(C)=O		CCCCCCCCCCCCCCCOC(C)=O	629-58-3	Pentadecyl acetate	270.457	119.923	-12.443	Organic compounds	Lipids and lipid-like molecules	Fatty Acyls	Fatty alcohol esters			2.37913	1.68717	2.89355	0.290801			2.1184	1.14554	2.9383	0.304843
AAALAKZAIRHZIX-UHFFFAOYSA-N	[Br-].OC(=O)CC[N+]1C2=CC=CC=C2OC=1CC=NC1C=CC=CC=1	[Br-]	OC(=O)CC[N+]1C2=CC=CC=C2OC=1CC=NC1C=CC=CC=1	68123-41-1	Benzoxazolium, 3-(2-carboxyethyl)-2-[2-(phenylamino)ethenyl]-, bromide (1:1)	309.345	-96.7718	-106.934	Organic compounds	Organoheterocyclic compounds	Benzoxazoles				1.85214	0.152087	2.55767	0.766989			1.24061	-0.587393	2.67537	0.761512
AAALFTUMOWSRRM-UHFFFAOYSA-N	NC(=O)C1CC2NC3=CC=C(Cl)C=C3C=2CC1		NC(=O)C1CC2NC3=CC=C(Cl)C=C3C=2CC1	35811-53-1	6-chloro-2,3,4,9-tetrahydro-1H-carbazole-2-carboxamide	248.713	-83.3389	86.2426	Organic compounds	Organoheterocyclic compounds	Indoles and derivatives	Carbazoles			1.19951	-0.425392	3.08361	0.750753			0.907072	-0.464648	2.17723	0.710424
AAALVYBICLMAMA-UHFFFAOYSA-N	O=C1NC(=O)C2=CC(NC3C=CC=CC=3)=C(C=C12)NC1C=CC=CC=1		O=C1NC(=O)C2=CC(NC3C=CC=CC=3)=C(C=C12)NC1C=CC=CC=1	145915-58-8	4,5-Dianilinophthalimide	329.359	-132.735	63.0977	Organic compounds	Organoheterocyclic compounds	Isoindoles and derivatives	Isoindolines			1.72811	0.15392	2.50675	0.583761			1.11794	-0.153402	2.51509	0.617309
AAAOYLLGHKLBRV-UHFFFAOYSA-N	C[SiH](C)OC(C)(C)C=C		C[SiH](C)OC(C)(C)C=C	23483-22-9	Silane, [(1,1-dimethyl-2-propen-1-yl)oxy]dimethyl-	144.29	75.62	-111.092	Organic compounds	Organometallic compounds	Organometalloid compounds	Organosilicon compounds			1.75197	0.523637	2.4662	0.730688			1.20643	-0.613638	2.19894	0.757762
AAAQFGUYHFJNHI-SFHVURJKSA-N	CC1=NN=C2C(CC(=O)NCC)N=C(C3=CC(=CC=C3N12)OC)C1C=CC(Cl)=CC=1		CC1=NN=C2C(CC(=O)NCC)N=C(C3=CC(=CC=C3N12)OC)C1C=CC(Cl)=CC=1	1260907-17-2	2-[(4S)-6-(4-Chlorophenyl)-8-methoxy-1-methyl-4H-[1,2,4]triazolo[4,3-a][1,4]benzodiazepin-4-yl]-N-ethylacetamide	423.904	-55.9488	90.6464	Organic compounds	Organoheterocyclic compounds	Benzodiazepines	1,4-benzodiazepines			1.2975	-0.222856	2.68121	0.765423			0.893456	-0.217556	2.26345	0.752926
AAAQKTZKLRYKHR-UHFFFAOYSA-N	C1=CC=CC=C1C(C1C=CC=CC=1)C1C=CC=CC=1		C1=CC=CC=C1C(C1C=CC=CC=1)C1C=CC=CC=1	519-73-3	Benzhydrylbenzene	244.337	-21.9691	-55.3077	Organic compounds	Benzenoids	Triphenyl compounds				1.45497	-0.33233	2.3172	0.523498			0.887145	-0.252607	2.09873	0.541498
AAARTTJTRNAYHQ-UHFFFAOYSA-N	CN1CCCC2CCCCC12		CN1CCCC2CCCCC12	16726-25-3	1-Methyldecahydroquinoline	153.269	65.3515	43.1076	Organic compounds	Organoheterocyclic compounds	Quinolidines				1.60659	-0.392152	2.38053	0.726451			0.602361	-0.897835	2.05673	0.740123
AAARTTJTRNAYHQ-ZJUUUORDSA-N	CN1CCCC2CCCCC12		CN1CCCC2CCCCC12	875-63-8	rel-(4aR,8aS)-Decahydro-1-methylquinoline	153.269	65.3527	43.1079	Organic compounds	Organoheterocyclic compounds	Quinolidines				1.60659	-0.392152	2.38053	0.726451			0.602361	-0.897835	2.05673	0.740123
AAASNKNLMQBKFV-UHFFFAOYSA-N	COc1cc(cc2oc(c(O)c(=O)c21)C1C=C(OC)C(=CC=1)OC)OC		COc1cc(cc2oc(c(O)c(=O)c21)C1C=C(OC)C(=CC=1)OC)OC	1244-78-6	["3-Hydroxy-3',4',5,7-tetramethoxyflavone"]	358.346	-75.5563	127.714	Organic compounds	Phenylpropanoids and polyketides	Flavonoids	Flavones			1.90953	0.310025	2.85347	0.744957			1.26662	-0.447801	2.73456	0.73494
AAAWJUMVTPNRDT-UHFFFAOYSA-N	CC(CCCO)CO		CC(CCCO)CO	42856-62-2	2-Methylpentane-1,5-diol	118.176	124.935	-90.3763	Organic compounds	Organic oxygen compounds	Organooxygen compounds	Alcohols and polyols			2.15442	1.36842	2.83827	0.526654			2.01107	0.966682	2.82804	0.565661
AAAXMNYUNVCMCJ-UHFFFAOYSA-N	ICCCI		ICCCI	627-31-6	Propane, 1,3-diiodo-	295.889	103.1	-125.602	Organic compounds	Organohalogen compounds	Organoiodides				1.66954	-0.351417	2.63103	0.835897			1.0473	-1.1191	2.36559	0.833333
AABBHSMFGKYLKE-SNAWJCMRSA-N	CC=CC(=O)OC(C)C		CC=CC(=O)OC(C)C	6284-46-4	1-Methylethyl (2E)-2-butenoate	128.171	108.152	-17.2531	Organic compounds	Lipids and lipid-like molecules	Fatty Acyls	Fatty acid esters			1.80491	0.800616	2.49952	0.634207			1.40651	0.334138	2.35598	0.690519
AABBHSMFGKYLKE-UHFFFAOYSA-N	CC=CC(=O)OC(C)C		CC=CC(=O)OC(C)C	18060-77-0	Isopropyl 2-butenoate	128.171	108.153	-17.2532	Organic compounds	Lipids and lipid-like molecules	Fatty Acyls	Fatty acid esters			1.80491	0.800616	2.49952	0.634207			1.40651	0.334138	2.35598	0.690519
AABILZKQMVKFHP-LZUZPLOVSA-N	CC(C)(O)C(O)(C(C)OC)C(=O)OCC1=CC[N+]2([O-])CCC(OC(=O)C(C)=CC)C21		CC(C)(O)C(O)(C(C)OC)C(=O)OCC1=CC[N+]2([O-])CCC(OC(=O)C(C)=CC)C21	127-30-0	Lasiocarpine, N-oxide	427.494	69.907	103.538	Organic compounds	Alkaloids and derivatives					1.98062	-0.642604	2.91964	0.799066			1.42842	-1.09496	2.81306	0.811006
AABLHGPVOULICI-BRJGLHKUSA-N	CN1CCC23C4OC5C2=C(CC1C3(O)CCC4O)C=CC=5O		CN1CCC23C4OC5C2=C(CC1C3(O)CCC4O)C=CC=5O	2183-56-4	Hydromorphinol [INN:BAN:DCF]	303.358	-11.3382	160.092	Organic compounds	Benzenoids	Phenanthrenes and derivatives				1.26488	-3.4381	2.46678	0.808513			0.74096	-3.6177	2.42686	0.800028
AABLHGPVOULICI-LQPBRMSDSA-N	CN1CCC23C4OC5C2=C(CC1C3(O)CCC4O)C=CC=5O		CN1CCC23C4OC5C2=C(CC1C3(O)CCC4O)C=CC=5O	54934-75-7	beta-Oxymorphol	303.358	-11.3382	160.092	Organic compounds	Benzenoids	Phenanthrenes and derivatives				1.26488	-3.4381	2.46678	0.808513			0.74096	-3.6177	2.42686	0.800028
AABVNLKNIVLBCB-UHFFFAOYSA-N	OC(=O)CCCCCCCCC(O)=O.C1CNCCN1	C1NCCNC1	OC(=O)CCCCCCCCC(O)=O	7433-23-0	Piperazine sebacate	202.25	77.5477	-46.8502	Organic compounds	Lipids and lipid-like molecules	Fatty Acyls	Fatty acids and conjugates	2.37367		2.16017	1.30983	2.72122	0.134314			2.28744	1.05116	3.03751	0.0754902
AABXRENNINHJOR-UHFFFAOYSA-N	Cl.CCN(CCOC(=O)CC(O)(C1C=CC=CC=1)C1C=CC=CC=1)CC	Cl	CCN(CCOC(=O)CC(O)(C1C=CC=CC=1)C1C=CC=CC=1)CC	53421-38-8	Diethylaminoethyl diphenylhydroxypropionate hydrochloride	341.451	-13.5701	-68.7871	Organic compounds	Benzenoids	Benzene and substituted derivatives	Diphenylmethanes			1.59473	0.196844	2.49322	0.635775			1.07461	-0.161428	2.41584	0.676785
AABXRMHVHPQKKP-UHFFFAOYSA-N	COC1C=CC2=C3C(=CC=CC3=1)C(=O)N(OCCCC)C2=O		COC1C=CC2=C3C(=CC=CC3=1)C(=O)N(OCCCC)C2=O	25826-31-7	N-Butoxy-4-methoxynaphthoimide	299.326	-48.6176	55.7391	Organic compounds	Organoheterocyclic compounds	Isoquinolines and derivatives	Isoquinolones and derivatives			1.73568	0.229998	2.50914	0.682822			0.976694	-0.280043	2.36527	0.738444
AACACXATQSKRQG-UHFFFAOYSA-L	[Mg+2].NCC([O-])=O.NCC([O-])=O	[Mg+2]	NCC(O)=O	14783-68-7	Magnesium glycinate	75.067	85.3881	-63.3633	Organic compounds	Organic acids and derivatives	Carboxylic acids and derivatives	Amino acids, peptides, and analogues			1.65843	0.261411	2.40223	0.564835			1.44222	-0.619524	2.61886	0.564835
AACFPJSJOWQNBN-UHFFFAOYSA-N	OC1=CC=C2OC3C(=O)NCCCC=3C2=C1		OC1=CC=C2OC3C(=O)NCCCC=3C2=C1	521937-07-5	CID755673	217.224	-77.7425	118.221	Organic compounds	Organoheterocyclic compounds	Benzofurans				1.67742	-1.2278	2.40152	0.735768			1.15774	-0.876709	2.49741	0.757644
AACMKKWADJBYOE-UHFFFAOYSA-N	C1=C(OC2=CC=CC=C21)C1C=CNN=1		C1=C(OC2=CC=CC=C21)C1C=CNN=1	666728-39-8	3-benzo[b]furan-2-yl-1H-pyrazole	184.198	-85.8242	103.482	Organic compounds	Organoheterocyclic compounds	Benzofurans				1.52185	-0.0615628	2.28029	0.776732			0.93376	-0.512172	2.06172	0.709488
AACOJGPCMIDLEY-UHFFFAOYSA-N	O.Cl.Cl.O=S(=O)(C1=CC=CC2=CN=CC=C21)N1CCNCCC1.O=S(=O)(C1=CC=CC2=CN=CC=C21)N1CCNCCC1	O.Cl	O=S(=O)(C1=CC=CC2=CN=CC=C21)N1CCCNCC1	186694-02-0	Fasudil hydrochloride hydrate	291.376	-12.607	57.1207	Organic compounds	Organoheterocyclic compounds	Isoquinolines and derivatives				1.41011	-0.21142	2.40291	0.777637			0.771407	-0.644708	2.24598	0.794256
AACQWMDCFMYTSE-UHFFFAOYSA-N	Cl.O=C(CCN1CCCC1)C1C=CC=CC=1	Cl	O=C(CCN1CCCC1)C1C=CC=CC=1	833-86-3	Propiophenone, 3-(1-pyrrolidinyl)-, hydrochloride	203.285	11.9657	53.3249	Organic compounds	Organic oxygen compounds	Organooxygen compounds	Carbonyl compounds			1.50217	-0.535642	2.33654	0.636316			0.908405	-0.375699	2.15349	0.64007
AACRWZVDRSTLKY-UHFFFAOYSA-N	[O-][N+](=O)C1=CC=CC=C1S(=O)(=O)N1CCCCC1		[O-][N+](=O)C1=CC=CC=C1S(=O)(=O)N1CCCCC1	314283-05-1	1-((2-Nitrophenyl)sulfonyl)piperidine	270.31	-122.259	24.2355	Organic compounds	Benzenoids	Benzene and substituted derivatives	Benzenesulfonamides			1.63614	-0.121391	2.468	0.61761			0.734687	-0.559427	2.22485	0.59945
AADCDMQTJNYOSS-LBPRGKRZSA-N	COC1=C(Cl)C=C(CC)C(O)=C1C(=O)NCC1CCCN1CC		COC1=C(Cl)C=C(CC)C(O)=C1C(=O)NCC1CCCN1CC	84226-12-0	Eticlopride	340.851	-2.30461	94.0632	Organic compounds	Benzenoids	Benzene and substituted derivatives	Benzoic acids and derivatives			1.25529	-0.273072	2.50196	0.749192			0.808578	-0.463508	2.18779	0.746732
AADCSFJSFODVPA-UHFFFAOYSA-N	COC(=O)C(Cl)C12CC3(CC(C1)CC(C2)C3)C(Cl)C(=O)OC		COC(=O)C(Cl)C12CC3(CC(C1)CC(C2)C3)C(Cl)C(=O)OC	16668-48-7	["Dimethyl 2,2'-(tricyclo[3.3.1.1~3,7~]decane-1,3-diyl)bis(chloroacetate)"]	349.254	83.2551	48.5034	Organic compounds	Organic acids and derivatives	Carboxylic acids and derivatives	Dicarboxylic acids and derivatives			1.22557	-1.0011	2.73902	0.750242			0.828084	-2.4139	2.42596	0.748779
AADDTEHKDBQTDE-UHFFFAOYSA-N	CC1C(=NNC2=CC(Cl)=CC=C2Cl)C(=O)[NH2+]C(=O)C=1[N+]1C=CC=CC=1.[O-]C(=O)C(O)CC([O-])=O	[O-]C(C(CC(=O)[O-])O)=O	CC1C(N=NC2C=C(Cl)C=CC=2Cl)C(=O)NC(=O)C=1[N+]1C=CC=CC=1	68214-61-9	["1,3'-Bipyridinium, 5'-[2-(2,5-dichlorophenyl)diazenyl]-1',2'-dihydro-6'-hydroxy-4'-methyl-2'-oxo-, 2-hydroxybutanedioate (1:1)"]	376.223	-113.38	-26.4314	Organic compounds	Benzenoids	Benzene and substituted derivatives	Halobenzenes			1.5661	-2.20229	2.61597	0.715852			1.32493	-0.208992	3.3911	0.71019
AADFBKFELOITOB-UHFFFAOYSA-N	O=C1C2=CC=CC=C2C(=O)N1N1C(C1C1C=CC=CC=1)C1C=CC=CC=1		O=C1C2=CC=CC=C2C(=O)N1N1C(C1C1C=CC=CC=1)C1C=CC=CC=1	33474-61-2	2-(2,3-Diphenylaziridin-1-yl)-1H-isoindole-1,3(2H)-dione	340.382	-41.7142	60.5727	Organic compounds	Phenylpropanoids and polyketides	Stilbenes				1.90149	0.22089	2.60364	0.651513			0.970599	-0.785229	2.42167	0.669272
AADKOQARFMAFHR-UHFFFAOYSA-N	NC1N=C(N)N=C(NCCNC2N=C(N)N=C(NCCNC3=NC(N)=NC(N)=N3)N=2)N=1		NC1N=C(N)N=C(NCCNC2N=C(N)N=C(NCCNC3=NC(N)=NC(N)=N3)N=2)N=1	78326-97-3	["N,N'-Bis(2-((4,6-diamino-1,3,5-triazin-2-yl)amino)ethyl)-1,3,5-triazine-2,4,6-triamine"]	430.445	15.3558	-85.6369	Organic compounds	Organoheterocyclic compounds	Triazines	Aminotriazines			2.05856	0.340745	2.84745	0.584335			1.84929	-0.0709517	2.90819	0.564245
AADNQNOXNWEYHS-UHFFFAOYSA-N	CC1C=C(OC(C)=O)C2=C(C=1)OC(C)(C)C1CCC(C)CC=12		CC1C=C(OC(C)=O)C2=C(C=1)OC(C)(C)C1CCC(C)CC=12	19825-63-9	Pirnabine	300.398	25.1948	-15.0349	Organic compounds	Organoheterocyclic compounds	Benzopyrans	1-benzopyrans			1.66854	-0.0641373	2.49473	0.76685			0.797584	-0.773481	2.12617	0.761295
AADQFNAACHHRLT-UHFFFAOYSA-N	CC1C=C(C)C(=CC=1)C(C)C		CC1C=C(C)C(=CC=1)C(C)C	4706-89-2	Benzene, 2,4-dimethyl-1-(1-methylethyl)-	148.249	-75.8172	-9.56925	Organic compounds	Lipids and lipid-like molecules	Prenol lipids	Monoterpenoids			1.53208	0.309995	2.3366	0.582174			1.28191	-0.511592	2.03724	0.542406
AADUTVXTSYIBNU-UHFFFAOYSA-N	CCCCCCCCSC(=O)Cl		CCCCCCCCSC(=O)Cl	13889-96-8	S-Octyl carbonochloridothioate	208.754	120.279	-118.822	Organic compounds	Organic acids and derivatives	Organic carbonic acids and derivatives				1.05095	-0.478931	2.2731	0.58836			0.797776	-0.636826	2.18146	0.592593
AADVAFSRHMQXEC-UHFFFAOYSA-L	[Na+].[Na+].CC1=CC(=CC=C1N=NC1C2=CC=C(C=C2C=CC=1N)S([O-])(=O)=O)C1C=C(C)C(=CC=1)N=NC1C2=CC=C(C=C2C=CC=1N)S([O-])(=O)=O	[Na+]	CC1C=C(C=CC=1N=NC1C2C=CC(=CC=2C=CC=1N)S(O)(=O)=O)C1C=C(C)C(=CC=1)N=NC1C2C=CC(=CC=2C=CC=1N)S(O)(=O)=O	6406-01-5	C.I. Direct Red 21	680.768	-167.641	-12.1192	Organic compounds	Benzenoids	Benzene and substituted derivatives	Biphenyls and derivatives			2.09406	0.638196	2.77879	0.499412			2.18327	0.841212	3.10532	0.543114
AADVCYNFEREWOS-OBRABYBLSA-N	CC(CC(C)C(O)C(C)C(OC(N)=O)C(C)C=CC=C)=CC(C)C(O)C(C)C=CC(O)CC1OC(=O)C(C)C(O)C1C		CC(CC(C)C(O)C(C)C(OC(N)=O)C(C)C=CC=C)=CC(C)C(O)C(C)C=CC(O)CC1OC(=O)C(C)C(O)C1C	127943-53-7	Discodermolide	593.802	76.3136	130.664	Organic compounds	Lipids and lipid-like molecules	Prenol lipids	Terpene lactones			2.08481	0.171141	2.83612	0.814934			1.69256	-0.993752	3.23756	0.820328
AADVZSXPNRLYLV-GKMXPDSGSA-N	OC(=O)C1C2CC3C4NC5=CC=CC=C5C=4CCN3CC2CCC1O		OC(=O)C1C2CC3C4NC5=CC=CC=C5C=4CCN3CC2CCC1O	522-87-2	Yohimbic acid	340.423	-32.8878	145.526	Organic compounds	Alkaloids and derivatives	Corynanthean-type alkaloids				1.61514	-2.91808	2.51774	0.774605			0.883011	-1.78772	2.43381	0.727756
AADYWCBPJZAJNU-UHFFFAOYSA-N	COC1=CC(CO)=CC=C1[N+]([O-])=O		COC1=CC(CO)=CC=C1[N+]([O-])=O	80866-88-2	(3-Methoxy-4-nitrophenyl)methanol	183.163	-130.469	16.4961	Organic compounds	Benzenoids	Benzene and substituted derivatives	Nitrobenzenes			1.84668	0.411622	2.57772	0.597853			1.20601	-0.502209	2.44657	0.61759
AAECWZSULYTBQR-UHFFFAOYSA-N	CC(O)=O.NC1C=CC(=CC=1)C1C=CC(N)=CC=1	CC(=O)O	NC1C=CC(=CC=1)C1C=CC(N)=CC=1	36341-27-2	Benzidine acetate	184.242	-55.9689	-50.7651	Organic compounds	Benzenoids	Benzene and substituted derivatives	Biphenyls and derivatives			1.10356	0.277147	2.09182	0.461446	-0.650849		0.132488	-0.705281	1.71864	0.360428
AAEHLOISIGDVHC-UHFFFAOYSA-N	NC1C=CC(C=NNC(=O)C2C=CN=CC=2)=CC=1		NC1C=CC(CN=NC(=O)C2C=CN=CC=2)=CC=1	6419-33-6	4-Pyridinecarboxylic acid, 2-[(4-aminophenyl)methylene]hydrazide	240.266	-68.5621	-58.647	Organic compounds	Organoheterocyclic compounds	Pyridines and derivatives	Pyridinecarboxylic acids and derivatives			1.71442	0.371333	2.45932	0.743632			1.13234	-0.110279	2.56372	0.72999
AAEHPKIXIIACPQ-UHFFFAOYSA-L	[Ca+2].[O-]C(=O)C1C=CC(=CC=1)C([O-])=O	[Ca+2]	OC(=O)C1C=CC(=CC=1)C(O)=O	13170-48-4	Calcium terephthalate	166.132	-43.0446	-34.5345	Organic compounds	Benzenoids	Benzene and substituted derivatives	Benzoic acids and derivatives			1.91889	0.943929	2.57032	0.394444	1.84262		1.87105	0.890873	2.68541	0.339048
AAEJJSZYNKXKSW-UHFFFAOYSA-N	OC(=O)CCC(F)(F)C(F)(F)C(F)(F)C(F)(F)C(F)(F)C(F)(F)F		OC(=O)CCC(F)(F)C(F)(F)C(F)(F)C(F)(F)C(F)(F)C(F)(F)F	27854-30-4	4,4,5,5,6,6,7,7,8,8,9,9,9-Tridecafluorononanoic acid	392.111	12.4736	-155.872	Organic compounds	Lipids and lipid-like molecules	Fatty Acyls	Fatty acids and conjugates			1.34114	-0.975869	2.43378	0.498584			0.912862	-0.916897	1.68293	0.498584
AAEKULYONKUBOZ-MLFFRYNPSA-N	CN1C2CCC1CC(C2C(=O)OC1C=CC=CC=1)C1C=CC(Cl)=CC=1		CN1C2CCC1CC(C2C(=O)OC1C=CC=CC=1)C1C=CC(Cl)=CC=1	146145-17-7	Phenyl (2S,3S)-3-(4-chlorophenyl)-8-methyl-8-azabicyclo[3.2.1]octane-2-carboxylate	355.865	38.702	52.4117	Organic compounds	Alkaloids and derivatives	Tropane alkaloids	Phenyltropanes			1.32616	-0.549632	2.40623	0.722341			0.800506	-1.75968	2.19931	0.734488
AAEOXZIUGCXWTF-UHFFFAOYSA-N	CC(O)C(N)C1C=CC=CC=1		CC(O)C(N)C1C=CC=CC=1	52500-61-5	1-Amino-1-phenylpropan-2-ol	151.209	-18.397	-53.8162	Organic compounds	Benzenoids	Benzene and substituted derivatives	Phenylpropanes			1.54222	0.428798	2.32827	0.564466			1.46089	0.0492804	2.93828	0.522126
AAEQHELGUQCYGL-UHFFFAOYSA-N	OC(=O)C(C1C=CC=CC=1)C1(O)CCC1		OC(=O)C(C1C=CC=CC=1)C1(O)CCC1	5463-97-8	(1-hydroxycyclobutyl)(phenyl)acetic acid	206.241	24.5854	43.2899	Organic compounds	Benzenoids	Benzene and substituted derivatives				1.49055	-0.0509735	2.3627	0.674991			1.11438	-0.941071	2.46972	0.676793
AAESVRBYUDTWKH-UHFFFAOYSA-N	CC(Br)C1N=CN=C(Cl)C=1F		CC(Br)C1N=CN=C(Cl)C=1F	188416-28-6	4-(1-Bromoethyl)-6-chloro-5-fluoropyrimidine	239.475	-5.60549	2.83917	Organic compounds	Organoheterocyclic compounds	Diazines	Pyrimidines and pyrimidine derivatives			1.00269	-0.555673	2.23164	0.808887			0.722036	-1.03803	2.33643	0.789803
AAEVPRISMKXZKU-UHFFFAOYSA-N	CCCCCCCCC1=CC=C(CCC(N)CCP(O)(O)=O)C=C1		CCCCCCCCC1=CC=C(CCC(N)CCP(O)(O)=O)C=C1	596819-84-0	[3-amino-5-(4-octylphenyl)pentyl]phosphonic acid	355.459	-21.4167	-92.6488	Organic compounds	Organic nitrogen compounds	Organonitrogen compounds	Amines			1.71345	0.234091	2.94854	0.541371			1.38019	-0.120956	2.4474	0.607469
AAEVYOVXGOFMJO-UHFFFAOYSA-N	CSC1N=C(NC(C)C)N=C(NC(C)C)N=1		CSC1N=C(NC(C)C)N=C(NC(C)C)N=1	7287-19-6	Prometryn	241.364	15.2164	-89.7338	Organic compounds	Organoheterocyclic compounds	Triazines	1,3,5-triazines	0.384145	0.384145	0.70063	-0.389051	1.74803	0.357459	1.02842	1.02842	0.738815	-0.563317	1.59595	0.357459
AAFJXZWCNVJTMK-GUCUJZIJSA-N	OC(C1CO1)C(O)C1CO1		OC(C1CO1)C(O)C1CO1	23261-20-3	1,2:5,6-DIANHYDROGALACTITOL	146.142	132.07	45.5968	Organic compounds	Organic oxygen compounds	Organooxygen compounds	Alcohols and polyols			2.01397	0.563096	2.7546	0.733711			1.60831	0.000624283	2.79056	0.740044
AAFJXZWCNVJTMK-UHFFFAOYSA-N	OC(C1CO1)C(O)C1CO1		OC(C1CO1)C(O)C1CO1	19895-66-0	1,2:5,6-Dianhydrohexitol	146.142	132.073	45.5961	Organic compounds	Organic oxygen compounds	Organooxygen compounds	Alcohols and polyols			2.01397	0.563096	2.7546	0.733711			1.60831	0.000624283	2.79056	0.740044
AAFMEUUZRXLGAY-UHFFFAOYSA-N	OC(=O)C#CC1=CC=CC2=CC=CC=C21		OC(=O)C#CC1=CC=CC2=CC=CC=C21	4843-42-9	3-(1-naphthyl)prop-2-ynoic acid	196.205	-70.1679	-20.5002	Organic compounds	Benzenoids	Naphthalenes				1.54901	-0.0397091	2.34683	0.612786			1.18889	-0.387968	2.57216	0.653045
AAFNEINEQRQMTF-WUUYCOTASA-N	CN1C(C)(C)CCCC1(C)C.OC(=O)C(O)C(O)C(O)=O	OC(C(C(C(=O)O)O)O)=O	CN1C(C)(C)CCCC1(C)C	546-48-5	Pempidine d-tartaric acid	155.285	91.3961	59.9416	Organic compounds	Organic oxygen compounds	Organooxygen compounds	Carbohydrates and carbohydrate conjugates			1.72774	0.238043	2.39335	0.77022			0.781221	-0.738777	2.13227	0.815295
AAFUUKPTSPVXJH-UHFFFAOYSA-N	BrC1C=C(Br)C(Br)=C(Br)C=1OC1C(Br)=C(Br)C(Br)=CC=1Br		BrC1C=C(Br)C(Br)=C(Br)C=1OC1C(Br)=C(Br)C(Br)=CC=1Br	117964-21-3	2,2â€²,3,3â€²,4,4â€²,6,6â€²-octabromodiphenyl ether	801.379	-128.776	-97.4968	Organic compounds	Benzenoids	Benzene and substituted derivatives	Diphenylethers			0.0507572	-0.868091	2.26927	0.562669			0.048126	-4.15277	1.53788	0.647325
AAFXQFIGKBLKMC-UHFFFAOYSA-N	OC(=O)C=CC1C=CC(C=CC(O)=O)=CC=1		OC(=O)C=CC1C=CC(C=CC(O)=O)=CC=1	16323-43-6	["3,3'-(p-Phenylene)diacrylic acid"]	218.208	-9.15662	-18.0345	Organic compounds	Phenylpropanoids and polyketides	Cinnamic acids and derivatives	Cinnamic acids			1.7745	0.487753	2.46083	0.594089			1.75838	0.0418797	2.83839	0.621387
AAFXYAXUEFJBJF-UHFFFAOYSA-N	S=c1c[n][nH]c2ccccc21		S=c1c[n][nH]c2ccccc21	875-67-2	4-Cinnolinethiol	162.217	-90.9948	63.4909	Organic compounds	Organoheterocyclic compounds	Diazanaphthalenes	Benzodiazines			0.869006	-0.586263	1.94872	0.693761			0.715483	-0.567575	1.80414	0.675536
AAGFTZAYXBVFGB-UHFFFAOYSA-N	CC1C=CC(=CC=1)C(Cl)C(C)C		CC1C=CC(=CC=1)C(Cl)C(C)C	68857-83-0	1-(1-Chloro-2-methylpropyl)-4-methylbenzene	182.694	-32.7781	-54.3997	Organic compounds	Benzenoids	Benzene and substituted derivatives	Phenylpropanes			1.18631	-0.37238	2.33572	0.62929			1.01162	-0.515376	2.11374	0.589044
AAGNGQHUXRGJEP-UHFFFAOYSA-N	CC(=O)OCC(OC(C)=O)OC(C)=O		CC(=O)OCC(OC(C)=O)OC(C)=O	2983-35-9	Ethylylidene triacetate	204.178	118.475	-23.7392	Organic compounds	Organic acids and derivatives	Carboxylic acids and derivatives	Tricarboxylic acids and derivatives			1.97317	0.537213	2.64704	0.454747			1.81994	-0.278345	2.85107	0.531189
AAGOOGMSOHOVSE-BZDYCCQFSA-N	CC12CCC3C(CCC4=CC(O)=CC=C43)C1CCC2OC(=O)C1C=CC=CC=1		CC12CCC3C(CCC4=CC(O)=CC=C43)C1CCC2OC(=O)C1C=CC=CC=1	983-30-2	Estradiol-17beta-benzoate	376.496	122.398	135.359	Organic compounds	Lipids and lipid-like molecules	Steroids and steroid derivatives	Steroid esters			0.896092	-3.13839	2.16449	0.619228			0.426743	-3.32015	2.24877	0.626811
AAGPAPGSTAMBHM-UHFFFAOYSA-N	CC(C)=C1CCC(C)(CC1)OC(=O)CC		CC(C)=C1CCC(C)(CC1)OC(=O)CC	72596-22-6	1-Methyl-4-(propan-2-ylidene)cyclohexyl propanoate	210.317	95.6602	69.9553	Organic compounds	Lipids and lipid-like molecules	Prenol lipids	Monoterpenoids			1.91941	0.798896	2.54624	0.736175			1.1138	0.00767205	2.18505	0.740144
AAGUVQQKGCSYKO-UHFFFAOYSA-N	NCCN(CCO)CCN(CCO)CCO		NCCN(CCO)CCN(CCO)CCO	84083-24-9	["2,2'-((2-((2-Aminoethyl)(2-hydroxyethyl)amino)ethyl)imino)bisethanol"]	235.328	99.1581	-92.6694	Organic compounds	Organic nitrogen compounds	Organonitrogen compounds	Amines			1.951	0.632251	2.65355	0.489976			1.12457	-0.400534	2.34005	0.569454
AAHCONIDGZPHOL-UHFFFAOYSA-N	NC1=CC=CC=C1C(=O)N1CCCC1		NC1=CC=CC=C1C(=O)N1CCCC1	52745-20-7	(2-Aminophenyl)(pyrrolidin-1-yl)methanone	190.246	10.2263	40.7145	Organic compounds	Benzenoids	Benzene and substituted derivatives	Benzoic acids and derivatives			1.47593	0.198229	2.29473	0.657257			0.898252	-0.560097	2.14376	0.644109
AAHDCDVGQFGFOJ-UHFFFAOYSA-N	CC(Cl)CF		CC(Cl)CF	20372-78-5	2-Chloro-1-fluoropropane	96.532	112.188	-89.8466	Organic compounds	Organohalogen compounds	Organofluorides				0.965515	-0.743101	2.31437	0.658939			1.05137	-0.697992	2.6628	0.595309
AAHQPLJUSLMHHR-UHFFFAOYSA-N	O=C(CCCl)C1C=CC(F)=CC=1		O=C(CCCl)C1C=CC(F)=CC=1	347-93-3	["2-Chloro-4'-fluoropropiophenone"]	186.613	-39.5129	-43.4236	Organic compounds	Organic oxygen compounds	Organooxygen compounds	Carbonyl compounds			1.12215	-0.497348	2.26122	0.699236			0.839554	-0.561996	2.0829	0.734128
AAHZCIWUDPKSJP-UHFFFAOYSA-N	COC(=O)C1=CC=CC=C1CCl		COC(=O)C1=CC=CC=C1CCl	34040-62-5	Methyl 2-chloromethylbenzoate	184.622	-45.9621	2.61534	Organic compounds	Benzenoids	Benzene and substituted derivatives	Benzoic acids and derivatives			1.23936	0.165733	2.34346	0.490509			1.07349	-0.292759	2.94395	0.481674
AAIBYZBZXNWTPP-NEPJUHHUSA-N	OC1CCCCC1C1C=CC=CC=1		OC1CCCCC1C1C=CC=CC=1	34281-92-0	(1S,2R)-2-Phenylcyclohexanol	176.259	31.3456	82.4014	Organic compounds	Organic oxygen compounds	Organooxygen compounds	Alcohols and polyols			1.42746	-0.131915	2.27265	0.658153			0.980918	-0.101019	2.12659	0.683465
AAIBYZBZXNWTPP-NWDGAFQWSA-N	OC1CCCCC1C1C=CC=CC=1		OC1CCCCC1C1C=CC=CC=1	2362-61-0	trans-2-Phenyl-1-cyclohexanol	176.259	31.3455	82.405	Organic compounds	Organic oxygen compounds	Organooxygen compounds	Alcohols and polyols			1.42746	-0.131915	2.27265	0.658153			0.980918	-0.101019	2.12659	0.683465
AAIBYZBZXNWTPP-UHFFFAOYSA-N	OC1CCCCC1C1C=CC=CC=1		OC1CCCCC1C1C=CC=CC=1	1444-64-0	2-Phenylcyclohexanol	176.259	31.3457	82.4036	Organic compounds	Organic oxygen compounds	Organooxygen compounds	Alcohols and polyols			1.42746	-0.131915	2.27265	0.658153			0.980918	-0.101019	2.12659	0.683465
AAIBYZBZXNWTPP-XXCBQWOANA-N	OC1CCCCC1C1C=CC=CC=1		OC1CCCCC1C1C=CC=CC=1	16201-63-1	cis-2-Phenylcyclohexanol	176.259	31.3453	82.4027	Organic compounds	Organic oxygen compounds	Organooxygen compounds	Alcohols and polyols			1.42746	-0.131915	2.27265	0.658153			0.980918	-0.101019	2.12659	0.683465
AAIHQDJOYDBMLC-UHFFFAOYSA-N	CC(C)C1C=C(C(C)C)C(O)=C2CCCCC2=1		CC(C)C1C=C(C(C)C)C(O)=C2CCCCC2=1	60834-81-3	2,4-Di(propan-2-yl)-5,6,7,8-tetrahydronaphthalen-1-ol	232.367	-74.5314	-7.3151	Organic compounds	Benzenoids	Tetralins				1.18471	0.0500093	2.22861	0.703519			0.858263	-0.242575	1.99744	0.709499
AAIUCVHMISBIEU-UHFFFAOYSA-N	CC(=O)NCCN1C=CC2=CC=CC=C12		CC(=O)NCCN1C=CC2=CC=CC=C12	56903-24-3	Acetamide, N-[2-(1H-indol-1-yl)ethyl]-	202.257	-61.8386	69.2842	Organic compounds	Organic acids and derivatives	Carboxylic acids and derivatives	Carboxylic acid derivatives			1.53955	-0.00937132	2.33672	0.691362			0.974223	-0.340123	2.26846	0.704646
AAIXZDBTEWDLSG-UHFFFAOYSA-N	CC(C)C1=CCC(C)C=C1		CC(C)C1=CCC(C)C=C1	586-68-5	.delta.-Terpinene	136.238	87.8856	79.4329	Organic compounds	Lipids and lipid-like molecules	Prenol lipids	Monoterpenoids			1.70539	0.616826	2.4299	0.777413			1.31403	-0.162159	2.25149	0.779855
AAJBUPGJXKDHSC-UHFFFAOYSA-M	[Na+].NC1C2=C(C(=CC=1S([O-])(=O)=O)NC1C=CC(=CC=1)N=NC1C=CC(O)=CC=1)C(=O)C1=CC=CC=C1C2=O	[Na+]	NC1C2C(=O)C3C=CC=CC=3C(=O)C=2C(=CC=1S(O)(=O)=O)NC1C=CC(=CC=1)N=NC1=CC=C(O)C=C1	68444-08-6	2-Anthracenesulfonic acid, 1-amino-9,10-dihydro-4-[[4-[(4-hydroxyphenyl)azo]phenyl]amino]-9,10-dioxo-, monosodium salt	514.519	-144.262	65.7177	Organic compounds	Benzenoids	Anthracenes	Anthraquinones			2.23829	0.988187	2.79056	0.512391			2.02625	0.482374	2.89684	0.62243
AAJQTWWVKREOQP-UHFFFAOYSA-N	OC(=O)CCC(=O)C1=CC=C2C=CC3C=CC=C4C=CC1=C2C=34		OC(=O)CCC(=O)C1=CC=C2C=CC3C=CC=C4C=CC1=C2C=34	7499-60-7	gamma-Oxopyrene-1-butyric acid	302.329	-111.858	50.6039	Organic compounds	Benzenoids	Pyrenes				1.95898	0.546884	2.56228	0.675307			1.52598	0.214864	2.66626	0.680354
AAJRIJBGDLLRAE-UHFFFAOYSA-M	[Na+].CCCCOC([S-])=S	[Na+]	CCCCOC(S)=S	141-33-3	Carbonodithioic acid, O-butyl ester, sodium salt (1:1)	150.268	129.692	-9.36907	Organic compounds	Organic salts	Organic metal salts	Organic alkali metal salts			0.976556	-0.546334	2.61895	0.531168			0.536073	-0.717898	1.98687	0.546309
AAJZJNHQPBMCFV-UHFFFAOYSA-N	COC1=C(N)N=CN=C1Cl		COC1=C(N)N=CN=C1Cl	5018-41-7	6-Chloro-5-methoxypyrimidin-4-amine	159.576	-23.669	41.6705	Organic compounds	Organoheterocyclic compounds	Diazines	Pyrimidines and pyrimidine derivatives			0.870418	-0.833222	2.3449	0.754673			0.759251	-0.625779	2.00215	0.725848
AAKBKSANSMEPRC-UHFFFAOYSA-N	O=C(C1=CC2=CC=CC=C2N1)N1CCOCC1		O=C(C1=CC2=CC=CC=C2N1)N1CCOCC1	25406-89-7	STK001651	230.267	-96.3875	83.6732	Organic compounds	Organoheterocyclic compounds	Indoles and derivatives	Indolecarboxylic acids and derivatives			1.61825	0.24574	2.39474	0.697623			1.03074	-0.301509	2.22839	0.715432
AAKDPDFZMNYDLR-XZBKPIIZSA-N	CN1CC(O)C(O)C(O)C1CO		CN1CC(O)C(O)C(O)C1CO	69567-10-8	N-Methyldeoxynojirimycin	177.2	154.216	36.0962	Organic compounds	Organoheterocyclic compounds	Piperidines				2.00644	0.85325	2.58394	0.763737			1.24742	-0.526614	2.80257	0.775287
AAKJLRGGTJKAMG-UHFFFAOYSA-N	COCCOC1=CC2=NC=NC(NC3=CC(=CC=C3)C#C)=C2C=C1OCCOC		COCCOC1=CC2=NC=NC(NC3=CC(=CC=C3)C#C)=C2C=C1OCCOC	183321-74-6	Erlotinib	393.443	-57.6907	103.475	Organic compounds	Organoheterocyclic compounds	Diazanaphthalenes	Benzodiazines			1.53255	-0.455468	2.50391	0.784642			1.17129	-3.16531	2.46631	0.785756
AAKKPKDORDWLSG-UHFFFAOYSA-N	CCC(C)(S)CCC		CCC(C)(S)CCC	73775-71-0	3-Methylhexane-3-thiol	132.272	78.584	-122.511	Organic compounds	Organosulfur compounds	Thiols	Alkylthiols			1.24448	0.034607	2.28898	0.722628			0.803469	-0.83718	2.08967	0.734466
AAKMSGQPNUGLAZ-UHFFFAOYSA-N	O=c1c2c(c3[nH]c4c5c(ccc4c3cc2NC(=O)C2C=CC=CC=2)c(=O)c2c(cccc2NC(=O)C2C=CC=CC=2)c5=O)c(=O)c2ccccc12		O=c1c2c(c3[nH]c4c5c(ccc4c3cc2NC(=O)C2C=CC=CC=2)c(=O)c2c(cccc2NC(=O)C2C=CC=CC=2)c5=O)c(=O)c2ccccc12	131-92-0	C.I. Vat brown 3	665.661	-121.281	68.6478	Organic compounds	Benzenoids	Anthracenes				2.41825	0.519395	3.10635	0.707306			2.01816	-0.488048	3.00511	0.738699
AAKPJTCJKGHSJF-UHFFFAOYSA-N	CC[N+](C)(C)CC1C=C(C=CC=1)OC		CC[N+](C)(C)CC1C=C(C=CC=1)OC	46338-61-8	Emilium	194.298	-25.6493	-4.35593	Organic compounds	Benzenoids	Benzene and substituted derivatives	Phenylmethylamines			1.29929	-0.0781704	2.28065	0.650252			1.03297	-0.395046	2.43783	0.630542
AAKQQOBKHPTSIS-UHFFFAOYSA-N	CC(=O)NC1=CN=NS1		CC(=O)NC1=CN=NS1	4194-08-5	N-1,2,3-Thiadiazol-5-ylacetamide	143.171	-100.514	-64.0873	Organic compounds	Organic nitrogen compounds	Organonitrogen compounds	N-arylamides			0.721754	-0.622447	2.11504	0.649011			0.642969	-0.725084	1.85785	0.658694
AAKRGJXYEAZMCE-AWEZNQCLSA-N	CCCCC(=O)N1CCCCC1C1C=NC=CC=1		CCCCC(=O)N1CCCCC1C1C=NC=CC=1	62783-95-3	Piperidine, 1-(1-oxopentyl)-2-(3-pyridinyl)-, (S)-	246.354	43.3656	78.9609	Organic compounds	Alkaloids and derivatives					1.25846	-0.536032	2.24468	0.688954			0.687823	-0.395752	2.07604	0.686224
AAKUUHILWZWNCL-UHFFFAOYSA-N	CC(C)=CCC1CC(CC=C1C)C(C)=O		CC(C)=CCC1CC(CC=C1C)C(C)=O	72928-23-5	Ethanone, 1-[4-methyl-5-(3-methyl-2-buten-1-yl)-3-cyclohexen-1-yl]-	206.329	97.3576	80.7462	Organic compounds	Lipids and lipid-like molecules	Prenol lipids	Monoterpenoids			1.38896	0.10956	2.29731	0.740811			0.915634	-0.159585	2.10691	0.76679
AALDANJLYWODLY-UHFFFAOYSA-N	CC1=C(SC2=C(O)C(=CC(Cl)=C2C)C(C)C)C(O)=C(C=C1Cl)C(C)C		CC1=C(SC2=C(O)C(=CC(Cl)=C2C)C(C)C)C(O)=C(C=C1Cl)C(C)C	64633-23-4	["2,2'-Thiobis(4-chloro-6-isopropyl-m-cresol)"]	399.383	-76.6257	-6.82615	Organic compounds	Organosulfur compounds	Thioethers	Aryl thioethers			1.33073	-0.716354	2.73056	0.715955			0.94382	-2.9253	2.30084	0.718587
AALLCALQGXXWNA-QJNFORGASA-N	CC12CCC3C(=O)OC(CC3(C)C1C1C=CC2(O)C(=O)O1)C1=COC=C1		CC12CCC3C(=O)OC(CC3(C)C1C1C=CC2(O)C(=O)O1)C1=COC=C1	546-97-4	2-(Furan-3-yl)-7-hydroxy-6a,10b-dimethyl-1,2,4a,5,6,6a,7,10,10a,10b-decahydro-4H-10,7-(epoxymethano)naphtho[2,1-c]pyran-4,12-dione	358.39	91.7163	112.69	Organic compounds	Organoheterocyclic compounds	Naphthopyrans				1.7377	-3.37515	2.67105	0.793058			0.635404	-2.93979	2.44865	0.812246
AALLVKSRUNOPFP-RFWJHHGTSA-N	C1N2CCCCC2C2CC1(C1NCCCC1C2)C1CCCC(N1)C1CCC2NC1N1CCCC3CC4CC2(CN2CCCCC24)C13		C1N2CCCCC2C2CC1(C1NCCCC1C2)C1CCCC(N1)C1CCC2NC1N1CCCC3CC4CC2(CN2CCCCC24)C13	14350-67-5	20-(12,20-Cycloormosanin-21-yl)ormosanine	631.01	66.5288	45.4685	Organic compounds	Alkaloids and derivatives	Lupin alkaloids	Aloperine and related alkaloids			1.43248	-3.01015	2.80582	0.860021			0.876798	-4.1102	2.706	0.865475
AALLYEKQMKRVGR-UHFFFAOYSA-N	[O-][N+](=O)C1=C(N=C2C=CC=CN21)C(O)=O		[O-][N+](=O)C1=C(N=C2C=CC=CN21)C(O)=O	62195-06-6	3-Nitroimidazo[1,2-a]pyridine-2-carboxylic acid	207.145	-53.5394	30.0774	Organic compounds	Organoheterocyclic compounds	Imidazopyridines				1.708	0.084457	2.6189	0.70007			1.13328	-0.775512	2.57518	0.699304
AALNCHNFTKRFEL-UHFFFAOYSA-N	OC1C=C2C=C(NC2=CC=1)C(=O)C1=CC2=CC=CC=C2N1		OC1C=C2C=C(NC2=CC=1)C(=O)C1=CC2=CC=CC=C2N1	249762-62-7	PDGF Receptor Tyrosine Kinase Inhibitor I	276.295	-96.1234	81.3356	Organic compounds	Organoheterocyclic compounds	Indoles and derivatives	Indolecarboxylic acids and derivatives			1.99579	-0.173936	2.63951	0.721924			1.50715	-0.149123	2.60695	0.708845
AALOEZGCFHDEHM-UHFFFAOYSA-N	NC1NN=C(CCCN)C=1C#N		NC1NN=C(CCCN)C=1C#N	890609-52-6	5-amino-3-(3-aminopropyl)-1H-pyrazole-4-carbonitrile	165.2	-52.8917	24.0141	Organic compounds	Organic nitrogen compounds	Organonitrogen compounds	Amines			1.50193	0.239021	2.4061	0.799349			0.885994	-0.459823	2.21918	0.805881
AALQRZYXRYPZSN-UHFFFAOYSA-N	CC1C=C(C(O)=CC=1)C(=O)CC(=O)C1C=CC(Cl)=CC=1		CC1C=C(C(O)=CC=1)C(=O)CC(=O)C1C=CC(Cl)=CC=1	60402-29-1	1-(4-Chlorophenyl)-3-(2-hydroxy-5-methylphenyl)propane-1,3-dione	288.73	-61.1021	-26.8584	Organic compounds	Phenylpropanoids and polyketides	Linear 1,3-diarylpropanoids	Chalcones and dihydrochalcones			1.55294	-0.129578	2.56569	0.661257			1.08052	-0.198168	2.33051	0.666509
AALRHBLMAVGWRR-UHFFFAOYSA-N	CCC(=O)CCl		CCC(=O)CCl	616-27-3	1-Chlorobutan-2-one	106.552	79.6424	-57.2191	Organic compounds	Organic oxygen compounds	Organooxygen compounds	Carbonyl compounds			0.916428	-0.593904	2.15952	0.570367			0.634431	-0.660811	1.99945	0.605571
AALSSIXXBDPENJ-FYWRMAATSA-N	CC1C(O)=C(OC)C(OC)=C(O)C=1C=C(C=CCCCCCCC)C(O)=O		CC1C(O)=C(OC)C(OC)=C(O)C=1C=C(C=CCCCCCCC)C(O)=O	136164-66-4	(2E)-2-[(4,5-Dimethoxy-2-methyl-3,6-dioxo-1,4-cyclohexadien-1-yl)methylene]undecanoic acid	378.465	102.052	-35.8652	Organic compounds	Lipids and lipid-like molecules	Prenol lipids	Quinone and hydroquinone lipids			1.92668	0.269938	2.66874	0.663381			1.34243	-1.61619	2.65285	0.660922
AALUCPRYHRPMAG-UHFFFAOYSA-N	CCC(=O)OCC(O)CO		CCC(=O)OCC(O)CO	26894-50-8	2,3-Dihydroxypropyl propanoate	148.158	136.735	-25.4185	Organic compounds	Lipids and lipid-like molecules	Glycerolipids	Monoradylglycerols			2.19586	1.18769	2.92539	0.383751			2.27764	1.04523	3.15426	0.468584
AALXTPRRKXUUOM-UHFFFAOYSA-N	CC1(C)COC(C)(OC1)C1C=CC=CC=1		CC1(C)COC(C)(OC1)C1C=CC=CC=1	5406-58-6	2,5,5-Trimethyl-2-phenyl-1,3-dioxane	206.285	39.9893	68.2557	Organic compounds	Organic oxygen compounds	Organooxygen compounds	Ethers			1.48058	0.055387	2.32214	0.732613			1.10497	-0.355086	2.17802	0.723729
AALXZHPCKJILAZ-UHFFFAOYSA-N	CC(C)C1C=CC(COC(=O)C2=CC=CC=C2O)=CC=1		CC(C)C1C=CC(COC(=O)C2=CC=CC=C2O)=CC=1	94134-93-7	Isopropylbenzyl salicylate	270.328	8.54618	-67.2109	Organic compounds	Benzenoids	Benzene and substituted derivatives	Benzoic acids and derivatives			1.72593	0.562494	2.49784	0.532586			1.45451	0.226838	2.60106	0.533589
AALYQEIWIWMEAJ-UHFFFAOYSA-N	CC(=C)C1(O)CCC(C)CC1=O		CC(=C)C1(O)CCC(C)CC1=O	18194-21-3	Cyclohexanone, 2-hydroxy-5-methyl-2-(1-methylethenyl)-	168.236	82.3078	72.0377	Organic compounds	Lipids and lipid-like molecules	Prenol lipids	Monoterpenoids			1.82095	0.736548	2.46646	0.732309			1.26903	-0.118328	2.26518	0.711137
AAMCLCZHZXKWRV-RITPCOANSA-N	OC1CCCCC1Br		OC1CCCCC1Br	16536-57-5	2-Bromocyclohexan-1-ol	179.057	107.861	47.8827	Organic compounds	Organic oxygen compounds	Organooxygen compounds	Alcohols and polyols			0.989359	-0.563486	2.01602	0.734924			0.864606	-0.615595	2.14612	0.728464
AAMFJRVOHLKXLD-UHFFFAOYSA-N	CCCCCCC(C)OC(=O)NC1=CC=CC2=CC=CC=C21		CCCCCCC(C)OC(=O)NC1=CC=CC2=CC=CC=C21	7501-22-6	MLS000757188	299.414	1.84964	-78.956	Organic compounds	Benzenoids	Naphthalenes				1.56965	0.283184	2.38753	0.637745			0.969489	-0.473529	2.27379	0.637061
AAMHBRRZYSORSH-UHFFFAOYSA-N	CCCCCCCCC1CO1		CCCCCCCCC1CO1	2404-44-6	1,2-Epoxydecane	156.269	129.759	36.9481	Organic compounds	Organoheterocyclic compounds	Epoxides				2.12064	1.2805	2.66332	0.212317			1.38186	0.0256496	2.41626	0.553573
AAMKCWPTVSJLCN-UHFFFAOYSA-N	CCCCC1C=CC(=CC=1)[n]1c[n]c2c(=O)[nH]c(N)[n]c12		CCCCC1C=CC(=CC=1)[n]1c[n]c2c(=O)[nH]c(N)[n]c12	21318-90-1	4-Butylphenylguanine	283.335	26.323	115.554	Organic compounds	Organoheterocyclic compounds	Azoles	Imidazoles			1.63209	0.142213	2.44103	0.720547			0.922392	-0.319377	2.31346	0.734223
AAMWEWAFFUFOJV-UHFFFAOYSA-N	CCC(=O)OCC(C)O		CCC(=O)OCC(C)O	25496-75-7	2-Hydroxypropyl propanoatato	132.159	135.44	-24.9324	Organic compounds	Organic acids and derivatives	Carboxylic acids and derivatives	Carboxylic acid derivatives			2.14013	1.20103	2.76139	0.573203			1.9874	0.883265	2.8668	0.57561
AAMYCVULITZDFH-UHFFFAOYSA-K	[Na+].[Na+].[Na+].Cc1[nH][n](C2C=C3C(=CC=CC3=C(C=2)S([O-])(=O)=O)S([O-])(=O)=O)c(=O)c1N=NC1=CC(=CC=C1S([O-])(=O)=O)NC1N=C(N)N=C(Cl)N=1	[Na+]	Cc1[nH][n](C2C=C(C3C=CC=C(C=3C=2)S(O)(=O)=O)S(O)(=O)=O)c(=O)c1N=NC1C=C(C=CC=1S(O)(=O)=O)NC1N=C(N)N=C(Cl)N=1	13305-94-7	1,5-Naphthalenedisulfonic acid, 3-[4-[2-[5-[(4-amino-6-chloro-1,3,5-triazin-2-yl)amino]-2-sulfophenyl]diazenyl]-4,5-dihydro-3-methyl-5-oxo-1H-pyrazol-1-yl]-, sodium salt (1:3)	712.104	-179.32	15.4466	Organic compounds	Benzenoids	Naphthalenes	Naphthalene sulfonic acids and derivatives			2.2291	1.24608	2.85123	0.510936			1.82387	0.0654032	3.10618	0.673012
AANFRDGJHYLLAE-UHFFFAOYSA-N	CCCC(O)C#N		CCCC(O)C#N	5699-72-9	2-Hydroxypentanenitrile	99.133	128.707	-98.8196	Organic compounds	Organic nitrogen compounds	Organonitrogen compounds	Organic cyanides			1.61358	0.355859	2.38899	0.689855			0.858245	-0.336115	2.34133	0.662867
AANIECMHWBXFCP-UHFFFAOYSA-N	CCC1SC(CC)NC(CC)S1		CCC1SC(CC)NC(CC)S1	54717-17-8	2,4,6-Triethyl-1,3,5-dithiazinane	205.392	122.074	47.4249	Organic compounds	Organoheterocyclic compounds	Azacyclic compounds	Dithiazinanes			1.04316	-0.769342	2.28072	0.829255			0.616331	-0.988701	2.00453	0.789088
AANIYWVYGNJWIU-UHFFFAOYSA-N	OS(=O)(=O)OC1C=CC(=CC=1)C1(OC(=O)C2C1=C(Br)C=CC=2Br)C1C=CC(=CC=1)OS(O)(=O)=O		OS(=O)(=O)OC1C=CC(=CC=1)C1(OC(=O)C2C1=C(Br)C=CC=2Br)C1C=CC(=CC=1)OS(O)(=O)=O	17199-35-8	Dibromosulphthalein	636.248	-123.515	111.515	Organic compounds	Organic acids and derivatives	Organic sulfuric acids and derivatives	Arylsulfates			1.86021	-0.53267	2.60174	0.73938			0.886394	-2.86313	2.49467	0.768501
AANKDJLVHZQCFG-KVHNBARJSA-N	CC12CCC(O)CC1=CCC1C2CC(O)C2(C)C3C(CC21)N1CC(C)CCC1C3C		CC12CCC(O)CC1=CCC1C2CC(O)C2(C)C3C(CC21)N1CC(C)CCC1C3C	79-58-3	Rubijervine	413.646	108.956	124.986	Organic compounds	Lipids and lipid-like molecules	Steroids and steroid derivatives	Steroidal alkaloids			1.86258	-2.22657	2.73941	0.788064			0.660898	-3.27806	2.52094	0.724643
AANLCWYVVNBGEE-IDIVVRGQSA-L	[Na+].[Na+].[O-]P([O-])(=O)OCC1OC(C(O)C1O)[n]1c[n]c2c1[n]c[nH]c2=O	[Na+]	OP(O)(=O)OCC1OC(C(O)C1O)[n]1c[n]c2c1[n]c[nH]c2=O	4691-65-0	Disodium inosinate	348.208	34.822	129.696	Organic compounds	Nucleosides, nucleotides, and analogues	Purine nucleotides	Purine ribonucleotides			1.72468	-0.777466	2.57717	0.791007			1.06144	-1.43106	2.96337	0.802467
AANMHCRRPDNWHF-ZOWNYOTGSA-N	[O-][N+](=O)C1=CC=CC=C1SNC(CC(=O)OCC1C=CC=CC=1)C(O)=O.C1CCCCC1NC1CCCCC1	C1C(NC2CCCCC2)CCCC1	[O-][N+](=O)C1=CC=CC=C1SNC(CC(=O)OCC1C=CC=CC=1)C(O)=O	2418-90-8	4-Benzyl hydrogen N-((2-nitrophenyl)thio)-L-aspartate, compound with dicyclohexylamine (1:1)	376.39	27.5609	-34.5509	Organic compounds	Organic acids and derivatives	Carboxylic acids and derivatives	Amino acids, peptides, and analogues			1.92835	0.0286865	2.71239	0.613031			1.01355	-0.520531	2.44856	0.659234
AANMVENRNJYEMK-MRVPVSSYSA-N	CC(C)C1CCC(=O)CC=1		CC(C)C1CCC(=O)CC=1	2158-59-0	4-Isopropyl-2-cyclohexen-1-one, (R)-(-)-	138.21	86.1206	81.2697	Organic compounds	Organic oxygen compounds	Organooxygen compounds	Carbonyl compounds			1.77862	0.793732	2.4529	0.724965			1.32362	-0.0275786	2.29966	0.755507
AANMVENRNJYEMK-UHFFFAOYSA-N	CC(C)C1CCC(=O)CC=1		CC(C)C1CCC(=O)CC=1	500-02-7	2-Cyclohexen-1-one, 4-(1-methylethyl)-	138.21	86.1203	81.2685	Organic compounds	Organic oxygen compounds	Organooxygen compounds	Carbonyl compounds			1.77862	0.793732	2.4529	0.724965			1.32362	-0.0275786	2.29966	0.755507
AANWBJLLAXURNB-UHFFFAOYSA-N	CCCCCCCCCCCCCCCCCCOC1C=C2C(=CC=1)C(O)=C(C=C2C1(OC(=O)C2=CC=CC3=CC=CC1=C32)C1=CC(=C(O)C2=CC=CC=C21)C(O)=O)C(O)=O		CCCCCCCCCCCCCCCCCCOC1C=C2C(=CC=1)C(O)=C(C=C2C1(OC(=O)C2=CC=CC3=CC=CC1=C32)C1=CC(=C(O)C2=CC=CC=C21)C(O)=O)C(O)=O	38122-81-5	2-Naphthalenecarboxylic acid, 4-[1-(3-carboxy-4-hydroxy-1-naphthalenyl)-3-oxo-1H,3H-naphtho[1,8-cd]pyran-1-yl]-1-hydroxy-6-(octadecyloxy)-	825.011	-113.653	106.186	Organic compounds	Benzenoids	Naphthalenes	Naphthalenecarboxylic acids and derivatives			2.26916	-0.170742	2.98241	0.677127			1.75194	-0.828237	2.83182	0.680317
AAODRZMUIIDRJX-UHFFFAOYSA-N	Cc1[nH]c(=O)c(cc1C)[N+]([O-])=O		Cc1[nH]c(=O)c(cc1C)[N+]([O-])=O	98276-88-1	5,6-dimethyl-3-nitro-1H-pyridin-2-one	168.152	-136.117	18.143	Organic compounds	Organic 1,3-dipolar compounds	Allyl-type 1,3-dipolar organic compounds	Organic nitro compounds			1.73113	0.0717566	2.49562	0.625677			0.817187	-0.607063	2.22707	0.602369
AAOFJKLTRKOQTQ-UHFFFAOYSA-N	CC1=C(O)C(=C(C=C1OC)OC)C(C)=O		CC1=C(O)C(=C(C=C1OC)OC)C(C)=O	23121-32-6	1-(2-Hydroxy-4,6-dimethoxy-3-methylphenyl)ethan-1-one	210.229	-21.5935	100.267	Organic compounds	Organic oxygen compounds	Organooxygen compounds	Carbonyl compounds			1.78926	0.16148	2.62791	0.677204			1.35292	-0.338889	2.55234	0.697634
AAOHKRNFHQXDFX-UHFFFAOYSA-N	CC(=C)C(=O)OC1C=CC(=CC=1)C(C1C=CC(=CC=1)OC(=O)C(C)=C)(C(F)(F)F)C(F)(F)F		CC(=C)C(=O)OC1C=CC(=CC=1)C(C1C=CC(=CC=1)OC(=O)C(C)=C)(C(F)(F)F)C(F)(F)F	108050-42-6	(1,1,1,3,3,3-Hexafluoropropane-2,2-diyl)di(4,1-phenylene) bis(2-methylprop-2-enoate)	472.381	-17.7575	-28.5699	Organic compounds	Benzenoids	Benzene and substituted derivatives	Diphenylmethanes			1.18426	-0.438835	2.47131	0.613568			0.920508	-1.12836	2.32899	0.688057
AAOLGDRTKZMLIG-OUKQBFOZSA-N	CC(=CC(C)=O)C1C=CC(=CC=1)C1C=CC=CC=1		CC(=CC(C)=O)C1C=CC(=CC=1)C1C=CC=CC=1	55845-78-8	(E)-4-(4-Biphenylyl)-3-penten-2-one	236.314	-38.4861	-31.65	Organic compounds	Benzenoids	Benzene and substituted derivatives	Biphenyls and derivatives			1.55392	0.325151	2.32378	0.633977			1.09346	-0.12403	2.27073	0.638739
AAOLKUONXGOAGA-UHFFFAOYSA-N	CC1=CC(=CC(=C1O)C(O)=O)C=O		CC1=CC(=CC(=C1O)C(O)=O)C=O	6265-16-3	5-Formyl-3-methylsalicylic acid	180.159	-75.7615	-4.20107	Organic compounds	Benzenoids	Benzene and substituted derivatives	Benzoic acids and derivatives			1.82011	0.64569	2.5436	0.646015			1.52962	0.0461472	2.5014	0.683916
AAORACFZMYMFCG-UHFFFAOYSA-N	CCCCCCCCC(=O)NCC1=CC(OC)=C(O)C=C1I		CCCCCCCCC(=O)NCC1=CC(OC)=C(O)C=C1I	859171-97-4	6-Iodonordihydrocapsaicin	419.303	47.8935	-33.352	Organic compounds	Benzenoids	Phenols	Methoxyphenols			1.23243	-0.631869	2.4543	0.628586			0.881149	-0.773063	2.32467	0.644
AAOSLLBWWRKJIR-UHFFFAOYSA-N	O=C(CCl)N1CCCC1		O=C(CCl)N1CCCC1	20266-00-6	1-(Chloroacetyl)pyrrolidine	147.605	63.6853	32.5094	Organic compounds	Organoheterocyclic compounds	Pyrrolidines	N-acylpyrrolidines			0.710296	-0.63155	1.93301	0.692771			0.646917	-0.611676	2.09267	0.712168
AAOVKJBEBIDNHE-UHFFFAOYSA-N	CN1C(=O)CN=C(C2=CC(Cl)=CC=C12)C1C=CC=CC=1		CN1C(=O)CN=C(C2=CC(Cl)=CC=C12)C1C=CC=CC=1	439-14-5	Diazepam	284.746	-52.7438	90.3252	Organic compounds	Organoheterocyclic compounds	Benzodiazepines	1,4-benzodiazepines			1.22097	-0.115703	2.36556	0.731159			0.775313	-0.230024	1.95923	0.711965
AAOYLOCWJSLLJU-UHFFFAOYSA-N	OC1=CC=C(Br)C=C1C(=O)C(=O)C1=CC(Br)=CC=C1O		OC1=CC=C(Br)C=C1C(=O)C(=O)C1=CC(Br)=CC=C1O	523-88-6	Dibromsalicil	400.022	-64.2741	-6.14078	Organic compounds	Phenylpropanoids and polyketides	Stilbenes				1.60078	-0.380529	2.65711	0.674037			1.07988	-0.47956	2.47585	0.657609
AAPGLCCSVSGLFH-UHFFFAOYSA-N	O=C1CCNC(=O)C2NC=CC1=2		O=C1CCNC(=O)C2NC=CC1=2	72908-87-3	Aldisine	164.164	-32.6353	72.0935	Organic compounds	Organoheterocyclic compounds	Pyrroloazepines				1.78265	0.289031	2.52911	0.742633			1.34874	-0.206585	2.69349	0.746016
AAPHNZCZOSOYTI-UHFFFAOYSA-N	FC(F)(F)C(F)(F)C(F)(F)N(C(F)(F)C(F)(F)C(F)(F)F)C(F)(F)C(F)(F)C(F)(F)C(F)(F)C(F)(F)C(F)(F)N(C(F)(F)C(F)(F)C(F)(F)F)C(F)(F)C(F)(F)C(F)(F)F		FC(F)(F)C(F)(F)C(F)(F)N(C(F)(F)C(F)(F)C(F)(F)F)C(F)(F)C(F)(F)C(F)(F)C(F)(F)C(F)(F)C(F)(F)N(C(F)(F)C(F)(F)C(F)(F)F)C(F)(F)C(F)(F)C(F)(F)F	143356-32-5	["Perfluoro-N,N,N',N'-tetrakis(heptafluoropropyl)-1,6-hexanediamine"]	1004.13	22.1848	-140.45	Organic compounds	Organic nitrogen compounds	Organonitrogen compounds	Nitrogen mustard compounds			-0.427716	-0.740494	2.35463	0.700494			0.653702	-1.21879	2.66579	0.715333
AAPLIUHOKVUFCC-UHFFFAOYSA-N	C[Si](C)(C)O		C[Si](C)(C)O	1066-40-6	Trimethylsilanol	90.198	82.2479	-92.6175	Organic compounds	Organometallic compounds	Organometalloid compounds	Organosilicon compounds		1.58739	1.71471	0.345401	2.4113	0.735714			1.40315	-0.370545	2.6301	0.745455
AAPOVDIBCPRZPC-UHFFFAOYSA-N	CC1C=C(C)C=C(O)C=1C(C)=O		CC1C=C(C)C=C(O)C=1C(C)=O	16108-50-2	["2'-Hydroxy-4',6'-dimethylacetophenone"]	164.204	-59.5102	-2.14963	Organic compounds	Organic oxygen compounds	Organooxygen compounds	Carbonyl compounds			1.64116	0.564254	2.4088	0.608119			1.20741	-0.464312	2.18655	0.642503
AAPQJQRIUSSYBB-UHFFFAOYSA-M	[Na+].CC(C)(C)NCC([O-])=O	[Na+]	CC(C)(C)NCC(O)=O	58482-93-2	Sodium (tert-butylamino)acetate	131.175	88.3987	-64.6319	Organic compounds	Organic acids and derivatives	Carboxylic acids and derivatives	Amino acids, peptides, and analogues			1.99109	1.00882	2.58401	0.599371			1.72646	0.472867	2.79314	0.632704
AAPVOVKOHNCXJA-UHFFFAOYSA-N	CC(=O)CC(CC(=O)OCC)C(=O)OCC		CC(=O)CC(CC(=O)OCC)C(=O)OCC	1187-74-2	Diethyl acetonylsuccinate	230.26	90.3526	-12.9	Organic compounds	Organic acids and derivatives	Keto acids and derivatives	Gamma-keto acids and derivatives			2.09676	1.0308	2.69593	0.562941		0.980348	1.91811	0.506538	2.94237	0.568695
AAPVQEMYVNZIOO-UHFFFAOYSA-N	O=S1(=O)OCC2C(CO1)C1(Cl)C(Cl)=C(Cl)C2(Cl)C1(Cl)Cl		O=S1(=O)OCC2C(CO1)C1(Cl)C(Cl)=C(Cl)C2(Cl)C1(Cl)Cl	1031-07-8	Endosulfan sulfate	422.928	75.6048	46.7616	Organic compounds	Organic acids and derivatives	Organic sulfuric acids and derivatives	Sulfuric acid esters		-0.975791	0.140723	-1.01413	2.35361	0.618471		-0.727486	-0.573343	-2.47954	1.23964	0.611825
AAPZMQVULRVUEU-NZDAKWCRSA-N	CC(=O)OCC(=O)C1(O)C(C)CC2C3CC=C4CC(=O)C=CC4(C)C3=CCC12C		CC(=O)OCC(=O)C1(O)C(C)CC2C3CC=C4CC(=O)C=CC4(C)C3=CCC12C	910-99-6	(16beta)-21-(Acetyloxy)-17-hydroxy-16-methylpregna-1,4,9(11)-triene-3,20-dione	398.499	127.943	109.683	Organic compounds	Lipids and lipid-like molecules	Steroids and steroid derivatives	Pregnane steroids			1.55768	-2.3804	2.61995	0.743434			0.802664	-1.9176	2.49347	0.782
AAPZMQVULRVUEU-PYAFTSMNSA-N	CC(=O)OCC(=O)C1(O)C(C)CC2C3CC=C4CC(=O)C=CC4(C)C3=CCC12C		CC(=O)OCC(=O)C1(O)C(C)CC2C3CC=C4CC(=O)C=CC4(C)C3=CCC12C	10106-41-9	(16alpha)-21-(Acetyloxy)-17-hydroxy-16-methylpregna-1,4,9(11)-triene-3,20-dione	398.499	127.943	109.683	Organic compounds	Lipids and lipid-like molecules	Steroids and steroid derivatives	Pregnane steroids			1.55768	-2.3804	2.61995	0.743434			0.802664	-1.9176	2.49347	0.782
AAQBHIGARPQBLO-UHFFFAOYSA-N	OC1=CC2=CC=CC=C2N=C1C1C(=O)C2=CC=CC=C2C1=O		OC1=CC2=CC=CC=C2N=C1C1C(=O)C2=CC=CC=C2C1=O	32568-48-2	1H-Indene-1,3(2H)-dione, 2-(3-hydroxy-2(1H)-quinolinylidene)-	289.29	-130.302	44.4032	Organic compounds	Benzenoids	Indanes	Indanones		1.93418	1.94407	0.274924	2.65	0.663717		2.08241	1.65075	-0.0255642	2.54212	0.653162
AAQCEQKLOPOEPG-UHFFFAOYSA-N	C1=NN2N=NN=C2N=C1C1C=CC=CC=1		C1=NN2N=NN=C2N=C1C1C=CC=CC=1	59318-32-0	7-phenyltetrazolo[1,5-b][1,2,4]triazine	198.189	-60.426	30.9157	Organic compounds	Organoheterocyclic compounds	Triazines	1,2,4-triazines			1.58081	-0.0611585	2.33468	0.749747			0.735713	-0.711699	2.20583	0.754215
AAQCIMVFPOGSJU-UHFFFAOYSA-N	CC(O)=O.CC(C)NCC(O)COC1=CC=CC2=CC=CC=C21	CC(=O)O	CC(C)NCC(O)COC1=CC=CC2=CC=CC=C12	93982-03-7	Acetic acid--1-[(naphthalen-1-yl)oxy]-3-[(propan-2-yl)amino]propan-2-ol (1/1)	259.349	-4.16663	-106.984	Organic compounds	Benzenoids	Naphthalenes				1.54942	-0.0846741	2.39239	0.638392			0.994207	-0.266906	2.36396	0.638392
AAQDYYFAFXGBFZ-UHFFFAOYSA-N	CC(=O)OCC1CCCO1		CC(=O)OCC1CCCO1	637-64-9	2-Furanmethanol, tetrahydro-, 2-acetate	144.17	137.225	31.3768	Organic compounds	Organoheterocyclic compounds	Tetrahydrofurans				2.05026	0.982126	2.58104	0.564974			1.81213	0.81135	2.7329	0.653535
AAQFSZFQCXLMNT-ACMTZBLWSA-N	Cl.COC(=O)C(CC1C=CC=CC=1)NC(=O)C(N)CC(O)=O	Cl	COC(=O)C(CC1C=CC=CC=1)NC(=O)C(N)CC(O)=O	5910-52-1	3-Amino-4-hydroxy-4-[(1-methoxy-1-oxo-3-phenylpropan-2-yl)imino]butanoic acid--hydrogen chloride (1/1)	294.307	22.7463	-45.1033	Organic compounds	Organic acids and derivatives	Carboxylic acids and derivatives	Amino acids, peptides, and analogues	2.45272		2.17668	0.980326	2.80878	0.475645			1.93878	0.173929	3.30889	0.65108
AAQHUPAEJMTLMW-UHFFFAOYSA-N	COC1C=CC(=CC=1)OCC(=O)NC1C=C2OCOC2=CC=1		COC1C=CC(=CC=1)OCC(=O)NC1C=C2OCOC2=CC=1	5689-70-3	N-(1,3-benzodioxol-5-yl)-2-(4-methoxyphenoxy)acetamide	301.298	2.65039	119.727	Organic compounds	Organoheterocyclic compounds	Benzodioxoles				1.83602	0.189631	2.64835	0.683727			1.03604	-0.689299	2.50256	0.675856
AAQOQKQBGPPFNS-UHFFFAOYSA-N	CC[N+](C)(C)CC1=CC=CC=C1Br		CC[N+](C)(C)CC1=CC=CC=C1Br	59-41-6	Bretylium	243.168	-130.613	-48.0364	Organic compounds	Benzenoids	Benzene and substituted derivatives	Phenylmethylamines			0.996333	-0.536449	2.14424	0.672594			0.665783	-0.991104	2.23132	0.692635
AAQPOUCMFUHFNK-UHFFFAOYSA-N	CC(=O)OC(CC1CC(=O)NC(=O)C1)C1CC(C)CC(C)C1=O		CC(=O)OC(CC1CC(=O)NC(=O)C1)C1CC(C)CC(C)C1=O	1508-62-9	1-(3,5-Dimethyl-2-oxocyclohexyl)-2-(6-hydroxy-2-oxo-2,3,4,5-tetrahydropyridin-4-yl)ethyl acetate	323.389	88.1031	65.5975	Organic compounds	Organoheterocyclic compounds	Piperidines	Piperidinones			1.95475	0.317855	2.66455	0.772762			1.25074	-0.271494	2.54763	0.762358
AAQUCXJJDQZZOJ-UHFFFAOYSA-N	CCCCC(COP(OC1C=CC=CC=1)OCC(CCCC)CC)CC		CCCCC(COP(OC1C=CC=CC=1)OCC(CCCC)CC)CC	3164-60-1	Bis(2-ethylhexyl) phenyl phosphite	382.525	-9.29271	-90.5742	Organic compounds	Benzenoids	Benzene and substituted derivatives	Phenoxy compounds			1.86722	0.409221	2.62496	0.416099			1.38171	-0.202275	2.37489	0.530013
AAQYFENFDQNVMY-UHFFFAOYSA-N	[NH4+].[O-]C(=O)C(F)(F)C(F)(F)C(F)(F)C(F)(F)C(F)(F)C(F)(F)C(F)(F)C(F)(C(F)(F)F)C(F)(F)F	[NH4+]	OC(=O)C(F)(F)C(F)(F)C(F)(F)C(F)(F)C(F)(F)C(F)(F)C(F)(F)C(F)(C(F)(F)F)C(F)(F)F	3658-63-7	Ammonium perfluoro-9-(methyl)decanoate	564.085	5.27481	-132.65	Organic compounds	Lipids and lipid-like molecules	Fatty Acyls	Fatty acids and conjugates			-0.734592	-0.991129	2.11587	0.428571			0.486027	-1.32462	1.89703	0.447619
AARYHHIOYWDSLJ-UHFFFAOYSA-N	Cl.Cl.CCC(COCC(CN(CC)CC)OCC(O)CN(CC)CC)CCC	Cl	CCC(COCC(CN(CC)CC)OCC(O)CN(CC)CC)CCC	68938-75-0	2-Propanol, 1-(diethylamino)-3-[2-(diethylamino)-1-[[(2-ethylpentyl)oxy]methyl]ethoxy]-, hydrochloride (1:2)	374.61	130.902	-47.0914	Organic compounds	Organic nitrogen compounds	Organonitrogen compounds	Amines			1.92518	0.798381	2.65927	0.659562			0.965515	-0.263724	2.4342	0.686039
AASABFUMCBTXRL-UHFFFAOYSA-N	CC1C=CC(=CC=1)NCC		CC1C=CC(=CC=1)NCC	622-57-1	Benzenamine, N-ethyl-4-methyl-	135.21	-73.8278	-73.8512	Organic compounds	Benzenoids	Benzene and substituted derivatives	Toluenes			1.26709	0.192801	2.13481	0.622431			1.07888	-0.463508	2.17018	0.606453
AASCJSPDUDWGGQ-UHFFFAOYSA-N	Cl.CC(CN)(C1C=CC=CC=1)C1C=CC=CC=1	Cl	CC(CN)(C1C=CC=CC=1)C1C=CC=CC=1	40691-66-5	2,2-Diphenylpropan-1-amine--hydrogen chloride (1/1)	211.308	-28.3864	-71.4327	Organic compounds	Benzenoids	Benzene and substituted derivatives	Diphenylmethanes			1.1818	-1.02004	2.21871	0.571947			0.812933	-0.591731	2.03115	0.641892
AASCKLXRKILUGL-UHFFFAOYSA-N	CC12CCC(CC1CCC1C2CC(O)C2(C)C(C(O)CC21O)C1COC(=O)C=1)OC1CC(O)C(OC2CC(O)C(OC3CC(O)C(O)C(C)O3)C(C)O2)C(C)O1		CC12CCC(CC1CCC1C2CC(O)C2(C)C(C(O)CC21O)C1COC(=O)C=1)OC1CC(O)C(OC2CC(O)C(OC3CC(O)C(O)C(C)O3)C(C)O2)C(C)O1	52589-12-5	Diginatin	796.948	84.9486	124.882	Organic compounds	Lipids and lipid-like molecules	Steroids and steroid derivatives	Steroid lactones			1.8501	-1.42674	2.92219	0.803768			0.983136	-1.55465	2.8072	0.811077
AASDJASZOZGYMM-UHFFFAOYSA-N	N#CC(F)(C(F)(F)F)C(F)(F)F		N#CC(F)(C(F)(F)F)C(F)(F)F	42532-60-5	2,3,3,3-Tetrafluoro-2-(trifluoromethyl)propanenitrile	195.037	19.9131	-132.648	Organic compounds	Organic nitrogen compounds	Organonitrogen compounds	Cyanides			1.28239	-0.686105	2.34619	0.760411			0.672699	-1.77816	2.14592	0.743867
AASLUBJZRBOXBK-UHFFFAOYSA-N	CC1CCC(O)C1CCCCC		CC1CCC(O)C1CCCCC	76649-20-2	Cyclopentanol, 3-methyl-2-pentyl-	170.296	120.432	37.0154	Organic compounds	Organic oxygen compounds	Organooxygen compounds	Alcohols and polyols			1.82636	0.625951	2.46509	0.669054			1.2443	-0.0596451	2.2023	0.701291
AASNQZPKNMLTHY-UHFFFAOYSA-N	C1C(=CC=C2C=CC=CC2=1)C1=NN=C(O1)C1C=CC(=CC=1)C1C=CC=CC=1		C1C(=CC=C2C=CC=CC2=1)C1=NN=C(O1)C1C=CC(=CC=1)C1C=CC=CC=1	1103-59-9	["2-(1,1'-Biphenyl)-4-yl-5-(2-naphthyl)-1,3,4-oxadiazole"]	348.405	-71.0661	43.1565	Organic compounds	Benzenoids	Benzene and substituted derivatives	Biphenyls and derivatives			1.74301	0.177821	2.52458	0.661525			1.14841	-0.219041	2.69381	0.670849
AASRCBKEVNIKNS-UHFFFAOYSA-N	N#CC(C1C=CC(=CC=1)C(=O)C1C=CC=CC=1)C1C=CC(F)=CC=1		N#CC(C1C=CC(=CC=1)C(=O)C1C=CC=CC=1)C1C=CC(F)=CC=1	446275-89-4	2-(4-benzoylphenyl)-2-(4-fluorophenyl)acetonitrile	315.347	-48.2256	-34.7834	Organic compounds	Benzenoids	Benzene and substituted derivatives	Diphenylacetonitriles			1.63576	-0.234745	2.47667	0.604621			0.840979	-0.568777	2.37477	0.662496
AASSLPGKTZCKLS-YILALFFRSA-N	CCCCCC=CCCC=CC(=O)OCC		CCCCCC=CCCC=CC(=O)OCC	28380-08-7	Ethyl (2E,6Z)-2,6-dodecadienoate	224.344	105.928	-13.0354	Organic compounds	Lipids and lipid-like molecules	Fatty Acyls	Fatty acid esters			1.95598	0.800071	2.59142	0.514169			1.74506	0.68189	2.52946	0.508526
AASUNBIGKXSKNF-UHFFFAOYSA-N	CC(=CC)C(=O)N1CCCCC1		CC(=CC)C(=O)N1CCCCC1	54533-29-8	2-Methyl-1-(piperidin-1-yl)but-2-en-1-one	167.252	62.5036	33.1161	Organic compounds	Organoheterocyclic compounds	Piperidines	N-acylpiperidines			1.72038	0.601897	2.41299	0.693151			1.14224	-0.381128	2.18544	0.741513
AASWUWVVKDFAMD-UHFFFAOYSA-N	NC1C=C2N=NN(C2=CC=1)C1C=CC=CC=1		NC1C=C2N=NN(C2=CC=1)C1C=CC=CC=1	54883-78-2	Benzotriazol-5-amine, 1-phenyl-	210.24	-44.8549	37.1158	Organic compounds	Organoheterocyclic compounds	Azoles	Triazoles			1.28631	0.00339605	2.26821	0.721854			0.94285	-0.52058	2.14058	0.71699
AATGHKSFEUVOPF-UHFFFAOYSA-N	Br.CCNCC	Br	CCNCC	6274-12-0	DIETHYLAMINE, HYDROBROMIDE	73.139	89.5862	-114.722	Organic compounds	Organic nitrogen compounds	Organonitrogen compounds	Amines			1.64242	0.127898	2.67659	0.735575			1.33621	-0.362273	2.53753	0.748396
AATHLPHPRXGBAI-UHFFFAOYSA-M	O.[Na+].C=CC1=CC=C(C=C1)S([O-])(=O)=O	O.[Na+]	C=CC1=CC=C(C=C1)S(O)(=O)=O	123333-94-8	Sodium 4-ethenylbenzene-1-sulfonate--water (1/1/1)	184.216	-125.422	-40.5644	Organic compounds	Benzenoids	Benzene and substituted derivatives	Benzenesulfonic acids and derivatives			1.83397	0.776843	2.55595	0.515928			1.71158	0.245808	2.52655	0.564479
AATMBDYQEPKVEN-UHFFFAOYSA-N	CCOC(=O)CCN1CC(C)CCC1		CCOC(=O)CCN1CC(C)CCC1	70644-49-4	1-Piperidinepropanoic acid, 3-methyl-, ethyl ester	199.294	68.3824	18.8492	Organic compounds	Organoheterocyclic compounds	Piperidines				1.8501	0.756154	2.53642	0.651195			1.03862	-0.463247	2.26079	0.708394
AATMCCVYMZDTCD-UHFFFAOYSA-N	C1C=CC2=CC=CC=C2C=C1		C1C=CC2=CC=CC=C2C=C1	264-09-5	Benzocycloheptatriene	142.201	-25.006	69.4425	Organic compounds	Benzenoids					1.45373	0.131896	2.14838	0.727465			1.31763	-0.0967251	2.27923	0.717267
AATMTMCNADRZED-UHFFFAOYSA-N	CCC(F)(F)C(F)(F)CCBr		CCC(F)(F)C(F)(F)CCBr	151831-48-0	1-Bromo-3,3,4,4-tetrafluorohexane	237.034	24.2858	-155.562	Organic compounds	Organohalogen compounds	Organofluorides				1.00166	-1.27053	2.42156	0.782934			0.693901	-1.44209	2.34907	0.745493
AATNPSPOECSJBO-UHFFFAOYSA-N	COC1C=CC(=CC=1)c1cc(=O)[nH]c(=S)[nH]1		COC1C=CC(=CC=1)c1cc(=O)[nH]c(=S)[nH]1	33166-87-9	6-(4-Methoxyphenyl)-2-sulfanylidene-2,3-dihydropyrimidin-4(1H)-one	234.28	-61.5848	47.7298	Organic compounds	Organoheterocyclic compounds	Diazines	Pyrimidines and pyrimidine derivatives			1.08778	-0.442746	2.35656	0.630651			0.843349	-0.413036	2.14828	0.672781
AATNZNJRDOVKDD-UHFFFAOYSA-N	CCP(=O)(OCC)OCC		CCP(=O)(OCC)OCC	78-38-6	Diethyl ethylphosphonate	166.157	39.6758	-123.462	Organic compounds	Organic acids and derivatives	Organic phosphonic acids and derivatives	Phosphonic acid diesters		1.34883	1.67528	-0.901551	2.4067	0.589333			1.21069	-1.53905	2.14032	0.544
AATOGXGPMOMOQY-UHFFFAOYSA-N	CCCCCCCCC(C([O-])=O)[N+](C)(C)C		CCCCCCCCC(C([O-])=O)[N+](C)(C)C	34135-79-0	2-(Trimethylazaniumyl)decanoate	229.364	112.213	-46.51	Organic compounds	Organic acids and derivatives	Carboxylic acids and derivatives	Amino acids, peptides, and analogues			1.81503	0.577298	2.55537	0.578091			1.11668	-0.578502	2.81633	0.619592
AATPRMRVLQZEHB-UHFFFAOYSA-N	ClC1=CC(I)=CC(Cl)=C1		ClC1=CC(I)=CC(Cl)=C1	3032-81-3	3,5-Dichloroiodobenzene	272.9	-85.918	0.86288	Organic compounds	Benzenoids	Benzene and substituted derivatives	Halobenzenes			1.46554	-0.552482	2.60555	0.687024			0.723801	-1.10407	1.94031	0.657222
AATPYXMXFBBKFO-UHFFFAOYSA-N	COC1=CC(C(C)C)=C(C=C1I)OC1=CN=C(N)N=C1N		COC1=CC(C(C)C)=C(C=C1I)OC1=CN=C(N)N=C1N	865305-30-2	5-[5-Iodo-4-methoxy-2-(propan-2-yl)phenoxy]pyrimidine-2,4-diamine	400.22	-31.7735	116.696	Organic compounds	Organic oxygen compounds	Organooxygen compounds	Ethers			1.03506	-1.16187	2.56286	0.794739			0.895167	-0.913926	2.38265	0.772592
AAUIXMHRSOGWSE-UHFFFAOYSA-N	COC1C=CC(C=C(C(=O)OCC(C)C)C(=O)OCC(C)C)=CC=1		COC1C=CC(C=C(C(=O)OCC(C)C)C(=O)OCC(C)C)=CC=1	72955-42-1	Bis(2-methylpropyl) [(4-methoxyphenyl)methylidene]propanedioate	334.412	-10.1037	-10.8801	Organic compounds	Phenylpropanoids and polyketides	Cinnamic acids and derivatives	Cinnamic acid esters			1.97867	0.724564	2.67672	0.579919			1.70482	0.32798	2.77796	0.603776
AAURKQPZJJMXER-UHFFFAOYSA-N	CC(=O)O[Si](CC)(CC)CC		CC(=O)O[Si](CC)(CC)CC	5290-29-9	Silanol, 1,1,1-triethyl-, 1-acetate	174.316	79.4481	-85.4665	Organic compounds	Organometallic compounds	Organometalloid compounds	Organosilicon compounds			1.76495	-0.0231305	2.49436	0.512944			1.12405	-0.54504	2.19441	0.516021
AAUXVPAKDMCMMN-UHFFFAOYSA-N	C=CC1=CC=C(C=C1)OCC1CO1		C=CC1=CC=C(C=C1)OCC1CO1	2653-39-6	2-[(4-Ethenylphenoxy)methyl]oxirane	176.215	23.9235	8.69171	Organic compounds	Benzenoids	Phenol ethers				1.61147	0.564627	2.2967	0.534278			1.38095	-0.0601207	2.29811	0.679588
AAVGYEROXZEBTI-UHFFFAOYSA-N	CC(C)(C)N1CCC(CC1)c1cc2c(ccc(=O)[n]2C2C(Cl)=CC=CC=2Cl)c([n]1)C1=CC=C(F)C=C1F		CC(C)(C)N1CCC(CC1)c1cc2c(ccc(=O)[n]2C2C(Cl)=CC=CC=2Cl)c([n]1)C1=CC=C(F)C=C1F	444661-71-6	7-(1-tert-Butylpiperidin-4-yl)-1-(2,6-dichlorophenyl)-5-(2,4-difluorophenyl)-1,6-naphthyridin-2(1H)-one	542.457	-49.4273	102.144	Organic compounds	Organoheterocyclic compounds	Pyridines and derivatives	Phenylpyridines			1.5378	-2.15774	2.72361	0.803998			1.17718	-0.953651	2.99472	0.770726
AAVJJVBQARSXFC-UHFFFAOYSA-N	OC1C=CC(=CC=1)NC1=NN=NS1		OC1C=CC(=CC=1)NC1=NN=NS1	23567-67-1	4-[(2,3-Dihydro-1,2,3,4-thiatriazol-5-yl)imino]cyclohexa-2,5-dien-1-one	194.219	-101.448	-43.8119	Organic compounds	Organic nitrogen compounds	Organonitrogen compounds	Imines			0.970993	-0.631013	2.4154	0.685524			0.856849	-0.550641	2.06594	0.709333
AAVKQQUBPHSCML-UHFFFAOYSA-N	CCN(CCC1=CNC2=CC=CC(OP(O)(O)=O)=C12)CC		CCN(CCC1=CNC2=CC=CC(OP(O)(O)=O)=C12)CC	60480-02-6	3-[2-(Diethylamino)ethyl]-1H-indol-4-yl dihydrogen phosphate	312.306	-51.9543	126.452	Organic compounds	Organoheterocyclic compounds	Indoles and derivatives	Tryptamines and derivatives			1.22351	-0.814111	2.40146	0.759709			0.756981	-1.72546	2.26385	0.742163
AAVQBJDAXLIBIO-UHFFFAOYSA-N	CC(=O)c1cc2cc(ccc2oc1=O)OC		CC(=O)c1cc2cc(ccc2oc1=O)OC	13252-80-7	3-Acetyl-6-methoxy-2H-chromen-2-one	218.208	-80.5513	105.506	Organic compounds	Phenylpropanoids and polyketides	Coumarins and derivatives				1.90596	0.785303	2.67309	0.651804			1.5273	0.0441323	2.59453	0.63593
AAWIVICFKOFENR-UHFFFAOYSA-N	CCCCCCCCCCC(Br)CO		CCCCCCCCCCC(Br)CO	56804-71-8	1-Dodecanol, 2-bromo-	265.235	133.694	-97.5978	Organic compounds	Organohalogen compounds	Halohydrins	Bromohydrins			1.42586	-0.323826	2.41421	0.421333			1.17255	-0.910775	2.31719	0.51771
AAWKQWNRGJWSKK-UHFFFAOYSA-N	O=C(C(CC1C=CC=CC=1)N1CCOCC1)C1C=CC=CC=1		O=C(C(CC1C=CC=CC=1)N1CCOCC1)C1C=CC=CC=1	6267-73-8	MLS002607890	295.382	11.3319	44.1116	Organic compounds	Phenylpropanoids and polyketides	Linear 1,3-diarylpropanoids	Chalcones and dihydrochalcones			1.60785	0.365609	2.42355	0.663128			0.887253	-0.285536	2.32262	0.686014
AAWMBIUFIQYVAV-GXTWGEPZSA-N	CC1=CC2CCCCC2C2=CC=CC=C21		CC1=CC2CCCCC2C2=CC=CC=C21	121625-58-9	9-Methyl-trans-1,2,3,4,4a,10a-hexahydrophenanthrene	198.309	-17.1927	73.5185	Organic compounds	Benzenoids	Phenanthrenes and derivatives	Hydrophenanthrenes			1.16345	-0.662592	2.26689	0.735362			0.709405	-0.886438	1.94157	0.753318
AAWOKTGNZABRTQ-UHFFFAOYSA-N	NC1=CC=C(C=C1)S(=O)(=O)NC(CC1C=CC=CC=1)C(O)=O		NC1=CC=C(C=C1)S(=O)(=O)NC(CC1C=CC=CC=1)C(O)=O	133978-59-3	N-(4-Aminobenzene-1-sulfonyl)phenylalanine	320.37	19.8184	-47.7611	Organic compounds	Organic acids and derivatives	Carboxylic acids and derivatives	Amino acids, peptides, and analogues			1.98827	0.57768	2.62555	0.608643			1.50791	-0.104288	2.88608	0.651588
AAWZDTNXLSGCEK-WYWMIBKRSA-N	OC1C(O)CC(O)(CC1O)C(O)=O		OC1C(O)CC(O)(CC1O)C(O)=O	77-95-2	(-)-Quinic acid	192.167	86.7851	46.1011	Organic compounds	Organic oxygen compounds	Organooxygen compounds	Alcohols and polyols			1.90017	0.531083	2.56161	0.762934			1.89877	0.0156494	2.95668	0.74598
AAXAHUUIRLOQMB-UHFFFAOYSA-M	[Cl-].COC1C=CC(=CC=1)NC1C=CC(=CC=1)[N+]#N	[Cl-]	COC1C=CC(=CC=1)NC1C=CC(=CC=1)[N+]#N	101-69-9	Benzenediazonium, 4-[(4-methoxyphenyl)amino]-, chloride (1:1)	226.259	-19.0443	-8.10227	Organic compounds	Benzenoids	Phenol ethers	Aminophenyl ethers			1.34137	0.10721	2.297	0.650805			0.911064	-0.343328	2.17618	0.650805
AAXBKJXGVXNSHI-UHFFFAOYSA-N	CC(=C)COC1=CC=CC=C1O		CC(=C)COC1=CC=CC=C1O	4790-71-0	2-[(2-methyl-2-propenyl)oxy]phenol	164.204	-49.4573	-6.61332	Organic compounds	Benzenoids	Phenol ethers				1.65273	0.575692	2.30644	0.659229			1.50806	0.261392	2.27032	0.691862
AAXDQHWFEJRHNB-UDUKZKFFSA-L	[Na+].[Co+3].Cc1[n][n](C2C=CC=CC=2)c(=O)[c-]1N=NC1=CC(=CC=C1[O-])S(=O)(=O)NCCCOC(C)C.Cc1[n][n](C2C=CC=CC=2)c(=O)[c-]1N=NC1=CC(=CC=C1[O-])S(=O)(=O)NCCCOC(C)C	[Na+].[Co+3]	Cc1[nH][n](c(=O)c1N=NC1C=C(C=CC=1O)S(=O)(=O)NCCCOC(C)C)C1C=CC=CC=1	72479-33-5	Cobaltate(1-), bis(3-(2-(4,5-dihydro-3-methyl-5-(oxo-kappaO)-1-phenyl-1H-pyrazol-4-yl)diazenyl-kappaN1)-4-(hydroxy-kappaO)-N-(3-(1-methylethoxy)propyl)benzenesulfonamidato(2-))-, sodium (1:1)	473.555	-178.477	8.78632	Organic compounds	Organic acids and derivatives	Carboxylic acids and derivatives	Amino acids, peptides, and analogues			2.11777	0.362076	2.74881	0.581005			1.87551	0.0900997	2.97973	0.685329
AAXGWYDSLJUQLN-UHFFFAOYSA-N	CCCP(C1C=CC=CC=1)C1C=CC=CC=1		CCCP(C1C=CC=CC=1)C1C=CC=CC=1	7650-84-2	Diphenyl(propyl)phosphane	228.275	-53.983	-90.9163	Organic compounds	Benzenoids	Benzene and substituted derivatives				1.12179	-0.405816	2.29128	0.641809			0.790339	-0.977158	2.17072	0.635774
AAXKSSHVSDXPCO-UHFFFAOYSA-N	CC1=CC=CC=C1NC(=O)CC1C=CC=CC=1		CC1=CC=CC=C1NC(=O)CC1C=CC=CC=1	40748-53-6	Acetamide, 2-phenyl-N-(o-tolyl)-	225.291	-90.0513	-38.3458	Organic compounds	Benzenoids	Benzene and substituted derivatives	Phenylacetamides			1.57937	0.508464	2.36172	0.499518			0.972915	-0.12537	2.22134	0.606163
AAXOEELKVAXGBQ-UHFFFAOYSA-N	C[N+](C)(CC=C)CCCS([O-])(=O)=O		C[N+](C)(CC=C)CCCS([O-])(=O)=O	93841-12-4	Allyldimethyl(3-sulphonatopropyl)ammonium	207.295	27.4136	-98.3339	Organic compounds	Organic acids and derivatives	Organic sulfonic acids and derivatives	Organosulfonic acids and derivatives			1.66889	-0.136997	2.53863	0.729688			1.19485	-0.614855	2.47074	0.720361
AAXRUIWADFCFQA-UHFFFAOYSA-N	OC(=O)CCCCCCCCCCC(F)(F)C(F)(F)C(F)(F)C(F)(F)F		OC(=O)CCCCCCCCCCC(F)(F)C(F)(F)C(F)(F)C(F)(F)F	1652-66-0	11-(Perfluorobutyl)undecanoic acid	404.313	13.2864	-156.006	Organic compounds	Lipids and lipid-like molecules	Fatty Acyls	Fatty acids and conjugates			1.39319	-0.635743	2.51942	0.533333			1.0188	-1.11579	2.28619	0.524
AAXVEMMRQDVLJB-BULBTXNYSA-N	CC12CCC(=O)C=C1CCC1C3CCC(O)(C(=O)CO)C3(C)CC(O)C21F		CC12CCC(=O)C=C1CCC1C3CCC(O)(C(=O)CO)C3(C)CC(O)C21F	127-31-1	Fludrocortisone	380.456	118.29	107.787	Organic compounds	Lipids and lipid-like molecules	Steroids and steroid derivatives	Hydroxysteroids			1.33309	-2.61473	2.58257	0.693993			0.680973	-2.16353	2.53135	0.753716
AAXWBCKQYLBQKY-IRXDYDNUSA-N	CC(C)CC(NC(=O)C(CC1=CNC=N1)NC(=O)CNC(=O)C1=CC=CC=C1)C(O)=O		CC(C)CC(NC(=O)C(CC1=CNC=N1)NC(=O)CNC(=O)C1=CC=CC=C1)C(O)=O	31373-65-6	N-{1-Hydroxy-2-[(1-hydroxy-2-{[hydroxy(phenyl)methylidene]amino}ethylidene)amino]-3-(1H-imidazol-5-yl)propylidene}leucine	429.477	27.5117	-28.7347	Organic compounds	Organic acids and derivatives	Carboxylic acids and derivatives	Amino acids, peptides, and analogues			2.21447	0.523169	2.94609	0.731875			1.62923	-0.0363102	2.85038	0.743117
AAXXXGXIWSJELC-UHFFFAOYSA-N	CCOC1C=CC(=CC=1)N(OC(C)=O)C(C)=O		CCOC1C=CC(=CC=1)N(OC(C)=O)C(C)=O	31386-38-6	Hydroxylamine, N,O-diacetyl-N-(p-ethoxyphenyl)-	237.255	-26.0993	-36.1672	Organic compounds	Benzenoids	Benzene and substituted derivatives	Anilides			1.84247	0.582796	2.58956	0.665474			1.03191	-0.367208	2.37246	0.678039
AAXYAFFKOSNMEB-MHARETSRSA-N	Nc1[nH]c2c([n]c[n]2C2OC(COP(O)(=O)OP(O)(=O)OP(O)(=O)OCC3OC(C(O)C3O)[n]3c[n]c4c3[nH]c(N)[n]c4=O)C(O)C2O)c(=O)[n]1		Nc1[nH]c2c([n]c[n]2C2OC(COP(O)(=O)OP(O)(=O)OP(O)(=O)OCC3OC(C(O)C3O)[n]3c[n]c4c3[nH]c(N)[n]c4=O)C(O)C2O)c(=O)[n]1	6674-45-9	Guanosine 5â€²-(tetrahydrogen triphosphate), Pâ€²â€²â†’5â€²-ester with guanosine	788.41	37.6502	129.072	Organic compounds	Nucleosides, nucleotides, and analogues	(5'-5')-dinucleotides				2.00326	-0.803627	2.79372	0.808412			1.48626	-2.04054	3.33297	0.821424
AAXYNEPPTOVSSR-IXROVEORSA-N	OCC(O)C(O)C(O)C(O)COC(=O)CBr		OCC(O)C(O)C(O)C(O)COC(=O)CBr	94201-42-0	D-Glucitol 1-(bromoacetate)	303.105	137.401	-23.028	Organic compounds	Organic oxygen compounds	Organooxygen compounds	Carbohydrates and carbohydrate conjugates			1.48112	-0.503179	2.54691	0.600389			1.16488	-0.92389	3.01831	0.634101
AAXZFUQLLRMVOG-UHFFFAOYSA-N	CC(C)=CCCC1(C)C=CC2=C(O)C=C(CCC)C=C2O1		CC(C)=CCCC1(C)C=CC2=C(O)C=C(CCC)C=C2O1	41408-19-9	(+/-)-Cannabichromevarin	286.415	26.9826	-13.6663	Organic compounds	Organoheterocyclic compounds	Benzopyrans	1-benzopyrans			1.39309	-0.0672634	2.29724	0.767063			0.959299	-0.203091	2.13727	0.760366
AAYACJGHNRIFCT-AYRJTCQJSA-M	[Na+].CC(CCC(=O)NCC([O-])=O)C1CCC2C3C(CCC21C)C1(C)CCC(O)CC1CC3O	[Na+]	CC(CCC(=O)NCC(O)=O)C1CCC2C3C(CCC21C)C1(C)CCC(O)CC1CC3O	16564-43-5	Sodium glycochenodeoxycholate	449.632	97.9116	126.856	Organic compounds	Lipids and lipid-like molecules	Steroids and steroid derivatives	Bile acids, alcohols and derivatives			1.9864	-1.39026	2.69861	0.779276			0.856156	-2.97614	2.65354	0.759929
AAYCPBAOUJRPIC-UHFFFAOYSA-N	Cl.CN=C(N)N=C(N)N	Cl	CN=C(N)N=C(N)N	1674-62-0	N-Methyltriimidodicarbonic diamide--hydrogen chloride (1/1)	115.14	55.6347	-80.2965	Organic compounds	Organic nitrogen compounds	Organonitrogen compounds	Guanidines			1.72091	-0.0399914	2.4418	0.723221			1.16932	-0.396134	2.44192	0.772577
AAYGSSGHJGVNSK-UHFFFAOYSA-N	OC(CCO)CCCO		OC(CCO)CCCO	18990-98-2	1,3,6-Hexanetriol	134.175	129.772	-103.024	Organic compounds	Lipids and lipid-like molecules	Fatty Acyls	Fatty alcohols			2.15304	1.2287	2.9482	0.587391			1.99279	0.876819	2.88066	0.624151
AAYGWMVNFUJRJN-UHFFFAOYSA-N	CC1C=CC=C(OC)C=1N=C1NCCO1		CC1C=CC=C(OC)C=1N=C1NCCO1	21561-18-2	Aniline, 2-methoxy-6-methyl-N-(2-oxazolinyl)-	206.245	46.9607	59.3463	Organic compounds	Benzenoids	Benzene and substituted derivatives	Aniline and substituted anilines			1.48654	-0.048106	2.31557	0.756658			0.941102	-0.603598	2.2084	0.752624
AAYHAFZXFMIUSN-UHFFFAOYSA-N	NS(=O)(=O)C1CCCCC1		NS(=O)(=O)C1CCCCC1	2438-38-2	Cyclohexanesulfonamide	163.242	106.986	41.6999	Organic compounds	Organic acids and derivatives	Organic sulfonic acids and derivatives	Organosulfonic acids and derivatives			1.67859	0.446532	2.51886	0.694845			1.35247	-0.433967	2.40036	0.700159
AAYIYWGTGAUKQY-AATRIKPKSA-N	CCCC=CCCOC(C)=O		CCCC=CCCOC(C)=O	1576-78-9	(Z)-Hept-3-enyl acetate	156.225	119.264	-7.34114	Organic compounds	Organic acids and derivatives	Carboxylic acids and derivatives	Carboxylic acid derivatives			2.07035	1.19967	2.66121	0.433652			1.72443	0.89869	2.58583	0.541252
AAYKXJAFSKIHRK-UHFFFAOYSA-N	COC1=CC2=CC=CC=C2C(O)(C2CCN(C)CC2)C2C=CSC=21		COC1=CC2=CC=CC=C2C(O)(C2CCN(C)CC2)C2C=CSC=21	59743-88-3	10-Methoxy-4-(1-methylpiperidin-4-yl)-4H-benzo[4,5]cyclohepta[1,2-b]thiophene-4-ol	341.476	-14.171	85.8932	Organic compounds	Organoheterocyclic compounds	Cycloheptathiophenes				1.17749	-1.06251	2.49386	0.800006			0.853033	-1.91593	2.42563	0.808083
AAYLOGMTTMROGA-UHFFFAOYSA-N	O=P(C1C=CC=CC=1)(C1C=CC(F)=CC=1)C1C=CC(F)=CC=1		O=P(C1C=CC=CC=1)(C1C=CC(F)=CC=1)C1C=CC(F)=CC=1	54300-32-2	Bis(4-fluorophenyl)phenylphosphine oxide	314.271	-48.1559	-86.116	Organic compounds	Benzenoids	Benzene and substituted derivatives	Phenylphosphines and derivatives			1.21757	-0.919827	2.39771	0.702522			0.799947	-0.833411	2.29183	0.605952
AAYXEQGKAQUIMA-UHFFFAOYSA-N	CC(C)C(OCC1=CC=CO1)OCC1=CC=CO1		CC(C)C(OCC1=CC=CO1)OCC1=CC=CO1	94278-20-3	["2,2'-[(2-Methylpropane-1,1-diyl)bis(oxymethylene)]difuran"]	250.294	8.29492	-23.8612	Organic compounds	Organoheterocyclic compounds	Heteroaromatic compounds				1.62825	0.0332945	2.44622	0.757179			1.40181	-0.382996	2.60271	0.675372
AAYYTNPAPOADFH-SOFGYWHQSA-N	CC(=CC(C)C)C(=O)OCC		CC(=CC(C)C)C(=O)OCC	21016-46-6	2-Pentenoic acid, 2,4-dimethyl-, ethyl ester, (2E)-	156.225	95.1428	-10.091	Organic compounds	Lipids and lipid-like molecules	Fatty Acyls	Fatty acid esters			1.90294	1.01951	2.55625	0.585219		-0.585083	1.5285	0.544349	2.58129	0.596549
AAZCPESOYPGWEG-UHFFFAOYSA-N	CCCCCCCCC1=C(O)C=CC2=CC=CC=C21		CCCCCCCCC1=C(O)C=CC2=CC=CC=C21	31215-05-1	Octyl-2-naphthol	256.389	-33.3832	-97.8143	Organic compounds	Benzenoids	Naphthalenes	Naphthols and derivatives			1.22792	0.0146382	2.20448	0.555882			1.01023	-0.0280997	2.06329	0.585283
AAZKHZZNNTUSSY-UHFFFAOYSA-K	[K+].[K+].[K+].CCCCCCCCCCCCN(CP([O-])([O-])=O)CP([O-])(O)=O	[K+]	CCCCCCCCCCCCN(CP(O)(O)=O)CP(O)(O)=O	94230-68-9	Tripotassium hydrogen ((dodecylimino)bis(methylene))bisphosphonate	373.367	71.9833	-142.914	Organic compounds	Organic acids and derivatives	Organic phosphonic acids and derivatives	Organic phosphonic acids			1.90654	0.357273	2.63775	0.502748			1.38115	-0.304758	2.68451	0.514218
AAZKQXRGMFBMCF-UHFFFAOYSA-N	COC1=CC2=NC(N)=C(C=C2C=C1OC)C(N)=O		COC1=CC2=NC(N)=C(C=C2C=C1OC)C(N)=O	55149-43-4	2-amino-6,7-dimethoxyquinoline-3-carboxamide	247.254	-18.4042	92.7762	Organic compounds	Organoheterocyclic compounds	Quinolines and derivatives	Quinoline carboxamides			1.79385	0.228568	2.58429	0.725043			1.07358	-0.335603	2.43263	0.728729
AAZMHPMNAVEBRE-SDBHATRESA-N	NC1=NC=NC2=C1N=C(SC1=CC=C(Cl)C=C1)N2C1OC2COP(O)(=O)OC2C1O		NC1=NC=NC2=C1N=C(SC1=CC=C(Cl)C=C1)N2C1OC2COP(O)(=O)OC2C1O	41941-66-6	8-(4-Chlorophenylthio)-cAMP	471.819	29.4751	125.239	Organic compounds	Nucleosides, nucleotides, and analogues	Purine nucleotides	Cyclic purine nucleotides			1.91583	-0.660018	2.70081	0.805268			0.681414	-3.31146	2.55909	0.808355
AAZRETWAQFEOEW-UHFFFAOYSA-N	ClC(CSSCC(Cl)C1C=CC=CC=1)C1C=CC=CC=1		ClC(CSSCC(Cl)C1C=CC=CC=1)C1C=CC=CC=1	29184-39-2	Disulfide, bis(2-chloro-2-phenylethyl)	343.344	-23.1044	-56.2361	Organic compounds	Benzenoids	Benzene and substituted derivatives				1.36558	-0.750512	2.50916	0.63669			0.896903	-1.2434	2.30843	0.66177
AAZSASWTJCLJGM-UHFFFAOYSA-N	[Co].CCCCC(CC)C(O)=O	[Co]	CCCCC(CC)C(O)=O	13586-82-8	2-Ethylhexanoic acid--cobalt (1/1)	144.214	112.952	-41.1593	Organic compounds	Lipids and lipid-like molecules	Fatty Acyls	Fatty acids and conjugates			1.79308	0.622424	2.45234	0.271957			1.48419	0.542368	2.67165	0.380094
AAZVLNHLLNLZEE-UHFFFAOYSA-M	[Cl-].C[N+](C)(CC(O)CCl)CC1C=CC=CC=1	[Cl-]	C[N+](C)(CC(O)CCl)CC1C=CC=CC=1	67304-25-0	Benzenemethanaminium, N-(3-chloro-2-hydroxypropyl)-N,N-dimethyl-, chloride (1:1)	228.743	5.85352	-93.4799	Organic compounds	Benzenoids	Benzene and substituted derivatives	Phenylmethylamines			0.907378	-0.500277	2.30446	0.616687			0.711939	-0.655398	2.3108	0.638154
AAZXXADMFIVULZ-FVGYRXGTSA-N	COC1=CC=CC2=CC(=CC=C21)C(C)C([O-])=O.C1C[NH2+]CCN1	C1NCC[NH2+]C1	COC1=CC=CC2=CC(=CC=C21)C(C)C(O)=O	70981-66-7	Naproxen piperazine	230.263	-9.34495	-6.89209	Organic compounds	Benzenoids	Naphthalenes				1.66167	0.188881	2.42703	0.653858			1.13234	-0.122925	2.60455	0.654725
ABACVOXFUHDKNZ-UHFFFAOYSA-N	CC1=C(C=C(C2C=CC(Cl)=CC=2)N1C1C=CC(=CC=1)S(N)(=O)=O)C(=O)CC		CC1=C(C=C(C2C=CC(Cl)=CC=2)N1C1C=CC(=CC=1)S(N)(=O)=O)C(=O)CC	1000279-69-5	A-867744	402.903	-83.7002	15.3989	Organic compounds	Organoheterocyclic compounds	Pyrroles	Substituted pyrroles			1.49	-0.3098	2.61382	0.695324			0.985688	-0.249016	2.37866	0.709675
ABADVTXFGWCNBV-UHFFFAOYSA-N	ClC1C=CC(=CC=1)[Si](Cl)(Cl)Cl		ClC1C=CC(=CC=1)[Si](Cl)(Cl)Cl	825-94-5	Silane, trichloro(4-chlorophenyl)-	245.996	-50.5453	-56.7967	Organic compounds	Benzenoids	Benzene and substituted derivatives	Halobenzenes			1.03402	-0.664128	2.34003	0.602585			0.88853	-1.08593	2.06492	0.561515
ABALMDTULZCSTP-UHFFFAOYSA-N	CC1(C)C(C=C(Cl)C(F)(F)F)C1C(=O)Cl		CC1(C)C(C=C(Cl)C(F)(F)F)C1C(=O)Cl	78246-90-9	Cyclopropanecarbonyl chloride, 3-(2-chloro-3,3,3-trifluoro-1-propen-1-yl)-2,2-dimethyl-	261.07	78.958	12.0335	Organic compounds	Organic acids and derivatives	Carboxylic acids and derivatives	Cyclopropanecarboxylic acids and derivatives			0.39384	-1.08714	2.35602	0.604559			0.128043	-1.81549	1.89475	0.604559
ABAMRJVWDHJBTI-UHFFFAOYSA-N	CCC(COC(=O)C1CC2OC2CC1)CCCC		CCC(COC(=O)C1CC2OC2CC1)CCCC	62256-00-2	7-Oxabicyclo[4.1.0]heptane-3-carboxylic acid, 2-ethylhexyl ester	254.37	128.964	-44.1913	Organic compounds	Organoheterocyclic compounds	Oxepanes			1.59972	1.96722	0.798673	2.63403	0.464091			1.15935	-0.19858	2.3141	0.528603
ABAMRMYDBGTLHX-UHFFFAOYSA-N	O=C1C=CC(=O)N1C1=CC=CC=C1C1C=CC=CC=1		O=C1C=CC(=O)N1C1=CC=CC=C1C1C=CC=CC=1	65833-05-8	["1-([1,1'-Biphenyl]-2-yl)-1H-pyrrole-2,5-dione"]	249.269	-39.8321	51.3212	Organic compounds	Benzenoids	Benzene and substituted derivatives	Biphenyls and derivatives			1.59543	0.148157	2.39496	0.597523			0.980867	-0.500113	2.28021	0.639704
ABASSERKNXVFAX-UHFFFAOYSA-M	[Cl-].CC1=CC2=NC3C4=CC=CC=C4C(N)=CC=3[O+]=C2C=C1N(C)C	[Cl-]	Cc1cc2[n]c3c(cc(N)c4ccccc43)oc2cc1N(C)C	18472-89-4	Cresyl violet	304.373	-96.7114	42.4592	Organic compounds	Organoheterocyclic compounds	Benzoxazines	Phenoxazines			1.62008	-0.419978	2.56677	0.811058			1.07613	-0.437311	2.66385	0.834825
ABBADGFSRBWENF-UHFFFAOYSA-N	CC(C)(C)C1=CC(C=C(C#N)C#N)=CC(Br)=C1O		CC(C)(C)C1=CC(C=C(C#N)C#N)=CC(Br)=C1O	65678-07-1	Tyrphostin AG 1024	305.175	15.8328	-9.2215	Organic compounds	Benzenoids	Benzene and substituted derivatives	Phenylpropanes			1.11625	-1.77978	2.60665	0.65742			0.738169	-0.724109	2.19268	0.664682
ABBGMXMPOCXVNL-UHFFFAOYSA-N	NC(=O)C(Br)C#N		NC(=O)C(Br)C#N	1113-55-9	2-Bromo-3-nitrilopropionamide	162.974	61.0595	-71.3265	Organic compounds	Organic acids and derivatives	Carboxylic acids and derivatives	Carboxylic acid derivatives			0.701865	-0.728946	2.48683	0.703306			0.572372	-0.496845	2.1108	0.700484
ABBNXJIPPYAOSC-UHFFFAOYSA-N	CC(=O)NC1=C(O)C=CC2=CC=CC=C21		CC(=O)NC1=C(O)C=CC2=CC=CC=C21	117-93-1	Acetamide, N-(2-hydroxy-1-naphthalenyl)-	201.225	-109.979	36.6621	Organic compounds	Benzenoids	Naphthalenes	Naphthols and derivatives			1.66705	0.61938	2.38002	0.60359			0.967913	-0.185421	2.29926	0.608107
ABBOXTQECRSSQR-UHFFFAOYSA-N	FC(F)(F)C(F)(F)C(F)(F)C(F)(F)C(Br)CBr		FC(F)(F)C(F)(F)C(F)(F)C(F)(F)C(Br)CBr	236736-19-9	5,6-dibromo-1,1,1,2,2,3,3,4,4-nonafluorohexane	405.88	20.9749	-146.05	Organic compounds	Organohalogen compounds	Organofluorides				1.04405	-1.03867	2.35221	0.706322			-0.207717	-2.16625	2.07824	0.73466
ABBQGOCHXSPKHJ-WUKNDPDISA-N	NC1C=C(N)C(=CC=1)N=NC1C=CC(=CC=1)S(N)(=O)=O		NC1C=C(N)C(=CC=1)N=NC1C=CC(=CC=1)S(N)(=O)=O	103-12-8	Sulfamidochrysoidine	291.336	-157.695	-24.6659	Organic compounds	Organoheterocyclic compounds	Azobenzenes				1.78212	0.383551	2.51471	0.545685			1.3019	-0.241702	3.08596	0.627242
ABBQHOQBGMUPJH-UHFFFAOYSA-M	[Na+].[O-]C(=O)C1=CC=CC=C1O	[Na+]	OC1C=CC=CC=1C(O)=O	54-21-7	Sodium salicylate	138.122	-65.8486	-14.5338	Organic compounds	Benzenoids	Benzene and substituted derivatives	Benzoic acids and derivatives	1.49344	1.49344	1.62736	0.81096	2.29901	0.247556	2.16213	2.16213	1.66599	0.557204	2.39667	0.199111
ABBTUPYMSSTNOH-UHFFFAOYSA-M	[Na+].CCCCCCCCCCCCCCCCCC(=O)N(CCS([O-])(=O)=O)C1CCCCC1	[Na+]	CCCCCCCCCCCCCCCCCC(=O)N(CCS(O)(=O)=O)C1CCCCC1	63217-15-2	Ethanesulfonic acid, 2-[cyclohexyl(1-oxooctadecyl)amino]-, sodium salt	473.764	74.4077	-31.4628	Organic compounds	Lipids and lipid-like molecules	Fatty Acyls	Fatty amides			2.09219	0.569	2.78168	0.632			1.52378	-0.0925871	2.63273	0.655
ABCFHTQGKNXCHE-CLFAGFIQSA-N	CCCCCCCCC=CCCCCCCCCCCCC(=O)NCCCCCCCCCCCCC=CCCCCCCCC		CCCCCCCCC=CCCCCCCCCCCCC(=O)NCCCCCCCCCCCCC=CCCCCCCCC	87075-61-4	(13Z)-N-(13Z)-13-Docosen-1-yl-13-docosenamide	644.17	54.9294	-37.9178	Organic compounds	Lipids and lipid-like molecules	Fatty Acyls	Fatty amides			2.09261	0.353996	2.82562	0.374679			1.96725	0.184745	2.9326	0.379881
ABCLPPNEPBAKRL-UHFFFAOYSA-N	CC(N)C1OC(OC2C(O)C(OC3OCC(C)(O)C(NC)C3O)C(N)CC2N)C(O)C(O)C1O		CC(N)C1OC(OC2C(O)C(OC3OCC(C)(O)C(NC)C3O)C(N)CC2N)C(O)C(O)C1O	36889-16-4	4,6-Diamino-3-{[3-deoxy-4-C-methyl-3-(methylamino)pentopyranosyl]oxy}-2-hydroxycyclohexyl 6-amino-6,7-dideoxyheptopyranoside	496.558	56.973	167.52	Organic compounds	Organic oxygen compounds	Organooxygen compounds	Carbohydrates and carbohydrate conjugates			1.99071	0.382954	2.89689	0.81718			2.06396	-1.02215	3.44472	0.831284
ABCMRFDMEWGWOG-UHFFFAOYSA-M	[Na+].[O-]S(=O)(=O)C(CO)=CCO	[Na+]	OS(=O)(=O)C(CO)=CCO	4187-71-7	2-Butene-2-sulfonic acid, 1,4-dihydroxy-, monosodium salt	168.17	39.7386	-97.619	Organic compounds	Organic acids and derivatives	Organic sulfonic acids and derivatives	Organosulfonic acids and derivatives			1.90277	0.711254	2.63707	0.758095			1.42998	-1.57509	2.60175	0.743221
ABCOOORLYAOBOZ-KQYNXXCUSA-N	NC(=O)C1N=CN(C2OC(COP(O)(O)=O)C(O)C2O)C=1NC=O		NC(=O)C1N=CN(C2OC(COP(O)(O)=O)C(O)C2O)C=1NC=O	13018-54-7	5-Formamidoimidazole-4-carboxamide ribotide	366.223	35.8059	129.558	Organic compounds	Nucleosides, nucleotides, and analogues	Imidazole ribonucleosides and ribonucleotides	1-ribosyl-imidazolecarboxamides			1.74726	-0.736425	2.60584	0.825851			1.23979	-1.41579	3.03414	0.824081
ABCSYOJZMJGCOO-UHFFFAOYSA-N	CC(C)C1=CC=CC=C1S(O)(=O)=O.NCCO	NCCO	CC(C)C1=CC=CC=C1S(O)(=O)=O	93904-95-1	2-(Propan-2-yl)benzene-1-sulfonic acid--2-aminoethan-1-ol (1/1)	200.259	-136.38	-16.9835	Organic compounds	Benzenoids	Benzene and substituted derivatives	Benzenesulfonic acids and derivatives			1.7515	0.714802	2.40828	0.569746			1.48358	0.053295	2.47081	0.580801
ABCWEWNWAYDITM-UHFFFAOYSA-N	CN1C=CC=C1C1C=C(NN=1)C(O)=O		CN1C=CC=C1C1C=C(NN=1)C(O)=O	909858-38-4	3-(1-methyl-1H-pyrrol-2-yl)-1H-pyrazole-5-carboxylic acid	191.19	-48.8702	16.1929	Organic compounds	Organoheterocyclic compounds	Azoles	Pyrazoles			1.64362	0.308108	2.39716	0.736871			1.20036	-0.403393	2.75442	0.752583
ABDADCJADOXDLS-UHFFFAOYSA-M	[Na+].COC1=CC=CC=C1NCS([O-])(=O)=O	[Na+]	COC1C=CC=CC=1NCS(O)(=O)=O	61480-14-6	Methanesulfonic acid, [(2-methoxyphenyl)amino]-, monosodium salt	217.246	-101.359	13.2198	Organic compounds	Benzenoids	Benzene and substituted derivatives	Aniline and substituted anilines			1.84687	0.602541	2.49124	0.628439			1.29876	-0.306171	2.57916	0.629465
ABDCPGIQMBSVEO-UHFFFAOYSA-N	[O-][N+](=O)C1C=C(C2CCCC2)C(O)=CC=1		[O-][N+](=O)C1C=C(C2CCCC2)C(O)=CC=1	55910-34-4	2-Cyclopentyl-4-nitrophenol	207.229	-136.263	0.254942	Organic compounds	Benzenoids	Phenols	Nitrophenols			1.64589	0.0748335	2.39339	0.587288			0.892981	-0.576783	2.1599	0.571458
ABDIOITUDBUNNJ-UHFFFAOYSA-N	CC(COP(OC1C=CC=CC=1)OC1C=CC=CC=1)OC(C)COP(OC1C=CC=CC=1)OC1C=CC=CC=1		CC(COP(OC1C=CC=CC=1)OC1C=CC=CC=1)OC(C)COP(OC1C=CC=CC=1)OC1C=CC=CC=1	57077-45-9	Oxydi(propane-2,1-diyl) tetraphenyl bis(phosphite)	566.527	-8.98974	-89.7994	Organic compounds	Benzenoids	Benzene and substituted derivatives	Phenoxy compounds			1.64575	-2.4577	2.64496	0.509609			1.20578	-3.06985	2.58409	0.662797
ABDKAPXRBAPSQN-UHFFFAOYSA-N	COC1=CC=CC=C1OC		COC1=CC=CC=C1OC	91-16-7	1,2-Dimethoxybenzene	138.166	-53.1189	6.01751	Organic compounds	Benzenoids	Benzene and substituted derivatives	Methoxybenzenes			1.47059	0.310146	2.29036	0.63278		0.281378	1.28066	-0.208457	2.91752	0.545423
ABDMBNAKYBUEEX-DOLQZWNJSA-N	CCOC(=O)C1C(O)CC2CCC1N2C		CCOC(=O)C1C(O)CC2CCC1N2C	70939-97-8	Ethyl 3-hydroxy-8-methyl-8-azabicyclo[3.2.1]octane-2-carboxylate	213.277	38.8797	51.2285	Organic compounds	Alkaloids and derivatives	Tropane alkaloids				1.74578	0.218245	2.49656	0.674108			1.06753	-0.452687	2.47777	0.727048
ABDPTAUFTLYLPR-UHFFFAOYSA-N	CCP(=S)(OCC)SC1C=CC(Cl)=CC=1		CCP(=S)(OCC)SC1C=CC(Cl)=CC=1	2984-64-7	S-(4-Chlorophenyl) O-ethyl ethylphosphonodithioate	280.782	-47.9914	-94.9398	Organic compounds	Benzenoids	Benzene and substituted derivatives	Halobenzenes			0.321334	-1.28648	2.03663	0.630644			-0.405724	-2.55648	1.93014	0.618792
ABDPYMYJZBDRKL-UHFFFAOYSA-N	CC(CCCC(C)=C)=CCCC=O		CC(CCCC(C)=C)=CCCC=O	68844-98-4	4,9-Decadienal, 5,9-dimethyl-	180.291	116.246	9.46567	Organic compounds	Organic oxygen compounds	Organooxygen compounds	Carbonyl compounds			1.69495	0.612466	2.34638	0.682132			1.65593	0.490436	2.37352	0.662008
ABDVUIRYSXXVKE-UHFFFAOYSA-N	OCC1C2=CC=CC=C2C(Cl)=C2C=CC=CC2=1		OCC1C2=CC=CC=C2C(Cl)=C2C=CC=CC2=1	19996-02-2	10-Chloroanthracene-9-methanol	242.705	-104.78	40.868	Organic compounds	Benzenoids	Anthracenes				1.24867	-0.719473	2.39078	0.671059			0.999184	-0.5158	2.17873	0.669496
ABDWNIRZBUVFHC-XPWFQUROSA-N	NC1N=CN=C2C=1N=CN2C1OC(CO)C(OP(O)(=O)OCC2OC(C(O)C2OP(O)(O)=O)N2C=NC3=C2N=CN=C3N)C1O		NC1N=CN=C2C=1N=CN2C1OC(CO)C(OP(O)(=O)OCC2OC(C(O)C2OP(O)(O)=O)N2C=NC3=C2N=CN=C3N)C1O	3536-89-8	Adenylyl-(3â€²â†’5â€²)-3â€²-adenylic acid	676.433	33.0164	126.75	Organic compounds	Nucleosides, nucleotides, and analogues	(3'-5')-dinucleotides and analogues	(3'-5')-dinucleotides			1.98707	-0.874167	2.71151	0.792758			1.43384	-1.4175	3.31447	0.810149
ABEBWTHQUYXXHD-UHFFFAOYSA-N	C=CCOC(=O)CSCC(=O)OCC=C		C=CCOC(=O)CSCC(=O)OCC=C	6303-03-3	Acetic acid, thiodi-, diallyl ester	230.285	113.699	-2.25482	Organic compounds	Organic acids and derivatives	Carboxylic acids and derivatives	Dicarboxylic acids and derivatives			1.20365	-0.989394	2.33917	0.555554			0.772027	-0.95599	2.23913	0.530926
ABEJDMOBAFLQNJ-NHCUHLMSSA-N	CC1C=CC=C(CC2CC(CNC2=O)C2C=C(OC3CCCC3)C(=CC=2)OC)C=1		CC1C=CC=C(CC2CC(CNC2=O)C2C=C(OC3CCCC3)C(=CC=2)OC)C=1	617720-02-2	HT-0712	393.527	-4.92247	103.967	Organic compounds	Organoheterocyclic compounds	Piperidines	Benzylpiperidines			1.5719	0.2368	2.46205	0.777859			0.830327	-0.540818	2.27283	0.774165
ABENXYIRKLNIOP-UHFFFAOYSA-N	CCCC1=NC2OC(=C(N)C=2C2CC(C)(C)OCC=21)C(=O)C1C=CC=CC=1		CCCC1=NC2OC(=C(N)C=2C2CC(C)(C)OCC=21)C(=O)C1C=CC=CC=1	172985-21-6	Methanone, (1-amino-8,9-dihydro-8,8-dimethyl-5-propyl-6H-furo(2,3-b)pyrano(4,3-d)pyridin-2-yl)phenyl-	364.445	-22.9976	-19.9456	Organic compounds	Organic oxygen compounds	Organooxygen compounds	Carbonyl compounds			1.424	0.192792	2.40517	0.741399			0.880424	-0.533149	2.28077	0.74392
ABEQLFHXZUCGMF-UHFFFAOYSA-N	[N-]=[N+]=NC(F)(F)C(F)(F)C(=O)N1CCCCCC1		[N-]=[N+]=NC(F)(F)C(F)(F)C(=O)N1CCCCCC1	1242614-42-1	1-(1-Azepanyl)-3-azido-2,2,3,3-tetrafluoro-1-propanone	268.214	61.0527	32.9255	Organic compounds	Organoheterocyclic compounds	Azepanes				1.34705	-0.517685	2.4167	0.766258			0.693279	-1.54908	2.4044	0.788917
ABEUJUYEUCCZQF-UHFFFAOYSA-N	COC1=CC(Cl)=CC=C1[N+]([O-])=O		COC1=CC(Cl)=CC=C1[N+]([O-])=O	6627-53-8	5-Chloro-2-nitroanisole	187.582	-130.088	16.2274	Organic compounds	Benzenoids	Benzene and substituted derivatives	Nitrobenzenes			0.911744	-0.629179	2.19929	0.531734			0.627435	-0.614349	1.98741	0.580632
ABEWMCSPOKFJCI-UHFFFAOYSA-M	[Na+].[O-]C(=O)C1C=C(F)C(F)=CC=1	[Na+]	OC(=O)C1C=C(F)C(F)=CC=1	522651-44-1	Sodium 3,4-difluorobenzoate	158.103	-55.1839	-26.294	Organic compounds	Benzenoids	Benzene and substituted derivatives	Benzoic acids and derivatives			1.6161	-0.114648	2.43329	0.577189			1.29711	-1.56322	2.45517	0.553956
ABEXEQSGABRUHS-UHFFFAOYSA-N	CC(C)CCCCCCCCCCCCCCCOC(=O)CCCCCCCCCCCCCCC(C)C		CC(C)CCCCCCCCCCCCCCCOC(=O)CCCCCCCCCCCCCCC(C)C	41669-30-1	Isooctadecyl isooctadecanoate	536.97	129.913	-21.5106	Organic compounds	Lipids and lipid-like molecules	Fatty Acyls	Fatty acid esters		2.14986	2.39588	1.196	3.00641	0.0275862		2.28138	2.09536	0.604839	2.94102	0.151724
ABFBOAJLBJYHSJ-UHFFFAOYSA-N	COC1=CC=CC=C1C(=O)NS(=O)(=O)C1C=CC(=CC=1)C(O)=O		COC1=CC=CC=C1C(=O)NS(=O)(=O)C1C=CC(=CC=1)C(O)=O	1647059-04-8	4-[(2-Methoxybenzoyl)sulfamoyl]benzoic acid	335.337	-52.1701	0.972596	Organic compounds	Benzenoids	Benzene and substituted derivatives	Benzenesulfonamides			1.9468	0.653372	2.59835	0.561783			1.6873	0.0924799	2.76407	0.566148
ABFCFCPCGMHSRX-UHFFFAOYSA-M	[O-]C(=O)CCC(F)(F)C(F)(F)C(F)(F)C(F)(F)C(F)(F)F		OC(=O)CCC(F)(F)C(F)(F)C(F)(F)C(F)(F)C(F)(F)F	1799325-94-2	2H,2H,3H,3H-Perfluorooctanoate	342.104	11.3649	-156.476	Organic compounds	Lipids and lipid-like molecules	Fatty Acyls	Fatty acids and conjugates			1.42608	-0.632853	2.39269	0.498584			0.918181	-0.570508	1.6731	0.498584
ABFCOHSGVBONIO-UHFFFAOYSA-N	CCC#CCC(OCC)OCC		CCC#CCC(OCC)OCC	18229-85-1	1,1-Diethoxyhex-3-yne	170.252	128.336	-75.4099	Organic compounds	Organic oxygen compounds	Organooxygen compounds	Ethers			2.03769	0.963682	2.62838	0.788369			1.33555	-0.468428	2.3893	0.793528
ABFCOJLLBHXNOU-UHFFFAOYSA-N	OC1=CC=CC=C1CCO		OC1=CC=CC=C1CCO	7768-28-7	2-Hydroxybenzeneethanol	138.166	-75.4377	-27.9145	Organic compounds	Benzenoids	Phenols	1-hydroxy-4-unsubstituted benzenoids			1.61582	0.604221	2.27261	0.579721			1.59323	0.457321	3.11434	0.630224
ABFDKXBSQCTIKH-UHFFFAOYSA-M	[Br-].CC[N+]1C=CC=CC=1	[Br-]	CC[N+]1C=CC=CC=1	1906-79-2	1-Ethylpyridinium bromide	108.164	-87.1755	-106.343	Organic compounds	Organoheterocyclic compounds	Pyridines and derivatives	Pyridinium derivatives			0.381931	-0.773634	1.90606	0.581584			0.357788	-1.05052	1.97499	0.745725
ABFKLONNGOAUGG-UHFFFAOYSA-N	CCN(C)C(=O)OC1C=C2C(=CC=1)N(C)C1N(C)CCC21C.OC(=O)C1=CC=CC=C1O	OC(C1C(O)=CC=CC=1)=O	CCN(C)C(=O)OC1C=C2C(=CC=1)N(C)C1N(C)CCC21C	129101-32-2	2-Hydroxybenzoic acid--1,3a,8-trimethyl-1,2,3,3a,8,8a-hexahydropyrrolo[2,3-b]indol-5-yl ethyl(methyl)carbamate (1/1)	303.406	39.9831	101.428	Organic compounds	Organoheterocyclic compounds	Indoles and derivatives	Pyrroloindoles			1.3062	-0.312821	2.32957	0.766672			0.532451	-1.738	1.74961	0.763042
ABFKYPFPQRDCGM-UHFFFAOYSA-N	[Cu+2].ClC1=C2C(C3=NC4[N-]C(N=C5N=C(N=C6N=C([N-]C2=N3)C2C6=C(Cl)C(Cl)=C(Cl)C=2Cl)C2C5=C(Cl)C(Cl)=C(Cl)C=2Cl)=C2C=4C(Cl)=C(Cl)C(Cl)=C2Cl)=C(Cl)C(Cl)=C1Cl	[Cu+2]	ClC1C2C(=C3NC=2N=C2N=C(N=C4N=C(NC5=NC(=N3)C3=C5C(Cl)=C(Cl)C(Cl)=C3Cl)C3C4=C(Cl)C(Cl)=C(Cl)C=3Cl)C3C2=C(Cl)C(Cl)=C(Cl)C=3Cl)C(Cl)=C(Cl)C=1Cl	14832-14-5	Copper(2+) 1,2,3,4,8,9,10,11,15,16,17,18,22,23,24,25-hexadecachlorophthalocyanine-6,30-diide	1065.67	-124.66	40.6118	Organic compounds	Organoheterocyclic compounds	Tetrapyrroles and derivatives	Phthalocyanines			2.34213	-1.85221	3.14804	0.812082			-0.952268	-4.47864	2.53296	0.781306
ABFMMCZFKUIJGQ-UHFFFAOYSA-N	[O-][N+](=O)c1cc(CNCP(O)(O)=O)c2[nH]c(=O)c(=O)[nH]c2c1		[O-][N+](=O)c1cc(CNCP(O)(O)=O)c2[nH]c(=O)c(=O)[nH]c2c1	188696-80-2	Becampanel	330.193	-146.176	23.242	Organic compounds	Organoheterocyclic compounds	Diazanaphthalenes	Benzodiazines			1.87146	-0.0441092	2.63536	0.7509			1.15746	-0.364313	2.88384	0.736441
ABFPKTQEQNICFT-UHFFFAOYSA-M	[I-].C[N+]1=CC=CC=C1Cl	[I-]	C[N+]1=CC=CC=C1Cl	14338-32-0	2-Chloro-1-methylpyridinium iodide	128.582	-92.6853	-95.9902	Organic compounds	Organoheterocyclic compounds	Pyridines and derivatives	Methylpyridines			0.537824	-0.787552	2.15074	0.703741			0.412951	-0.84614	1.81786	0.679771
ABFRBTDJEKZSRM-UHFFFAOYSA-N	OC(C1C=CC=CC=1)C(Cl)(Cl)Cl		OC(C1C=CC=CC=1)C(Cl)(Cl)Cl	2000-43-3	2,2,2-Trichloro-1-phenylethanol	225.502	-19.6288	-52.9166	Organic compounds	Benzenoids	Benzene and substituted derivatives				1.1572	-0.582234	2.40841	0.581307			0.962544	-0.316993	2.08988	0.578241
ABFSJKJZYUNTMF-UHFFFAOYSA-N	O=C1CC(=O)NC2=CC=C(Cl)N=C2N1C1=CC=CC=C1Cl		O=C1CC(=O)NC2=CC=C(Cl)N=C2N1C1=CC=CC=C1Cl	42785-23-9	7-Chloro-5-(2-chlorophenyl)-1,3-dihydro-2H-pyrido(3,2-b)-1,4-diazepin-2-one 4-oxide	322.151	-48.0134	86.8038	Organic compounds	Organoheterocyclic compounds	Pyridodiazepines				1.25972	-0.387108	2.50262	0.752456			0.857297	-0.334415	2.21444	0.754295
ABFWOTZXBYVPIF-UHFFFAOYSA-N	CCCCCCCCCCCCCC(=O)OCCO		CCCCCCCCCCCCCC(=O)OCCO	22122-18-5	2-Hydroxyethyl tetradecanoate	272.429	141.54	-2.03005	Organic compounds	Lipids and lipid-like molecules	Fatty Acyls	Fatty acid esters			2.33657	1.59667	2.85374	0.193846			2.23698	1.15062	3.12676	0.267308
ABFZMYIIUREPLL-ASWJIRIHSA-N	CC(CCC(=O)NCC(O)=O)C1CCC2C3C(CCC21C)C1(C)CCC(CC1CC3O)OC1OC(C(O)C(O)C1O)C(O)=O		CC(CCC(=O)NCC(O)=O)C1CCC2C3C(CCC21C)C1(C)CCC(CC1CC3O)OC1OC(C(O)C(O)C1O)C(O)=O	79254-98-1	Glycochenodeoxycholic acid 3-glucuronide	625.756	98.3652	125.855	Organic compounds	Lipids and lipid-like molecules	Steroids and steroid derivatives	Steroidal glycosides			2.0227	-0.74528	2.82829	0.795374			0.951965	-1.62162	2.70053	0.791201
ABGIIXRNMHUKII-UHFFFAOYSA-N	O=C(C=CC1C=CC(Cl)=CC=1)C1C=CC=CC=1		O=C(C=CC1C=CC(Cl)=CC=1)C1C=CC=CC=1	956-04-7	4-Chlorochalcone	242.705	-8.30599	-19.6736	Organic compounds	Phenylpropanoids and polyketides	Linear 1,3-diarylpropanoids	Chalcones and dihydrochalcones			1.28832	-0.52992	2.37814	0.622273			0.910872	-0.374728	2.16211	0.625844
ABGMROJQDYKVHQ-UHFFFAOYSA-N	CC(C)(C)C1C=CC(=CC=1)C(CC(O)=O)NC(=O)C12CC3CC(C1)CC(C2)C3		CC(C)(C)C1C=CC(=CC=1)C(CC(O)=O)NC(=O)C12CC3CC(C1)CC(C2)C3	6411-37-6	3-(adamantane-1-carbonylamino)-3-(4-tert-butylphenyl)propanoic acid	383.532	11.3835	-29.4154	Organic compounds	Organic acids and derivatives	Carboxylic acids and derivatives	Amino acids, peptides, and analogues			1.20347	-3.33934	2.43876	0.727393			0.698884	-2.63841	2.26361	0.72086
ABGOJEHSELXHTI-UHFFFAOYSA-N	CC1=CC2=NC=CC=C2N=C1		CC1=CC2=NC=CC=C2N=C1	18937-71-8	3-methyl-1,5-naphthyridine	144.177	-91.8705	39.4701	Organic compounds	Organoheterocyclic compounds	Diazanaphthalenes	Naphthyridines			1.40979	-0.650981	2.14971	0.726063			0.575045	-0.885263	1.87823	0.698873
ABGUZAVIFZZDDZ-MHYQPVDNSA-N	CC(=O)OCC(=O)C1=CCC2C3CC=C4CC(=O)C=CC4(C)C3C(O)CC12C		CC(=O)OCC(=O)C1=CCC2C3CC=C4CC(=O)C=CC4(C)C3C(O)CC12C	3044-42-6	11-Hydroxy-3,20-dioxopregna-1,4,16-trien-21-yl acetate	384.472	124.619	110.561	Organic compounds	Lipids and lipid-like molecules	Steroids and steroid derivatives	Oxosteroids			1.53856	-2.30385	2.61092	0.702323			0.730477	-1.96015	2.46855	0.754041
ABGXADJDTPFFSZ-UHFFFAOYSA-N	C(C1CCNCC1)C1C=CC=CC=1		C(C1CCNCC1)C1C=CC=CC=1	31252-42-3	Piperidine, 4-(phenylmethyl)-	175.275	26.5601	76.3435	Organic compounds	Organoheterocyclic compounds	Piperidines	Benzylpiperidines			1.19787	-0.568604	2.17186	0.682574			0.879931	-0.407943	2.09707	0.686578
ABGYXXMZWPKYAU-UHFFFAOYSA-N	CC(=C)C(=O)NC(=O)C(C)=C		CC(=C)C(=O)NC(=O)C(C)=C	7370-82-3	N-(2-Methyl-1-oxoallyl)methacrylamide	153.181	65.1622	-46.4373	Organic compounds	Organic acids and derivatives	Carboxylic acids and derivatives	Carboxylic acid derivatives			1.66439	0.0735321	2.43213	0.55366			1.36722	-0.25749	2.45523	0.54366
ABGZWIFTZXUDGF-UHFFFAOYSA-N	CC1=CC=C(CCC=O)C=C1		CC1=CC=C(CCC=O)C=C1	5406-12-2	p-Methylhydrocinnamic aldehyde	148.205	-41.2444	-55.6689	Organic compounds	Benzenoids	Benzene and substituted derivatives	Toluenes			1.53217	0.456722	2.2105	0.661189			1.42896	-0.259715	2.29968	0.631
ABHFMEKGMXWMRF-UHFFFAOYSA-L	[Na+].[Na+].[O-]S(=O)(=O)C1C=CC(=CC=1)NC1N=C(Cl)N=C(NC2C=C(C=CC=2)NC2N=C(Cl)N=C(NC3C=CC(=CC=3)S([O-])(=O)=O)N=2)N=1	[Na+]	OS(=O)(=O)C1C=CC(=CC=1)NC1N=C(Cl)N=C(NC2C=C(C=CC=2)NC2N=C(Cl)N=C(NC3C=CC(=CC=3)S(O)(=O)=O)N=2)N=1	173659-60-4	["Benzenesulfonic acid, 4,4'-[1,3-phenylenebis[imino(6-chloro-1,3,5-triazine-4,2-diyl)imino]]bis-, sodium salt (1:2)"]	677.512	-187.383	-5.04221	Organic compounds	Benzenoids	Benzene and substituted derivatives	Benzenesulfonic acids and derivatives			2.2048	0.69408	2.87829	0.468282			1.72881	-1.22147	2.83001	0.557173
ABHHITAVUODQNA-UHFFFAOYSA-M	[K+].[O-]S(=O)(=O)C1C=CC=CC=1	[K+]	OS(=O)(=O)C1C=CC=CC=1	934-55-4	Potassium benzenesulphonate	158.178	-122.63	-41.2051	Organic compounds	Benzenoids	Benzene and substituted derivatives	Benzenesulfonic acids and derivatives			1.78332	0.648157	2.5235	0.474029			1.68963	0.25049	2.46293	0.497798
ABHNFDUSOVXXOA-UHFFFAOYSA-N	C[Si](C)(Cl)CC1C=CC=CC=1		C[Si](C)(Cl)CC1C=CC=CC=1	1833-31-4	Silane, chlorodimethyl(phenylmethyl)-	184.742	-43.6724	-75.0332	Organic compounds	Benzenoids	Benzene and substituted derivatives				1.17205	-0.30337	2.33277	0.615733			1.07044	-0.567805	2.22987	0.60009
ABHOEQJNEOMTEK-UHFFFAOYSA-N	N#CC1C=C(O)C=C(O)C=1		N#CC1C=C(O)C=C(O)C=1	19179-36-3	3,5-Dihydroxybenzonitrile	135.122	-71.0653	-33.6796	Organic compounds	Benzenoids	Phenols	Benzenediols			1.6296	0.518291	2.33444	0.68032			1.13547	-0.529039	2.17438	0.645457
ABHXLCBSTASDKL-UHFFFAOYSA-N	CC(C)(C)C1C=CC(=CC=1)SC1=CC=C(SC2C=CC=CC=2)C2=C1C(=O)C1C(=C(C=CC=1SC1C=CC=CC=1)SC1C=CC=CC=1)C2=O		CC(C)(C)C1C=CC(=CC=1)SC1=CC=C(SC2C=CC=CC=2)C2=C1C(=O)C1C(=C(C=CC=1SC1C=CC=CC=1)SC1C=CC=CC=1)C2=O	83929-63-9	1-[(4-tert-Butylphenyl)sulfanyl]-4,5,8-tris(phenylsulfanyl)anthracene-9,10-dione	696.984	-58.9586	-75.2306	Organic compounds	Benzenoids	Anthracenes	Anthraquinones			1.38322	-2.26522	2.60695	0.704927			1.15405	-3.4221	2.68348	0.718895
ABHZSCLGDWVDOY-UHFFFAOYSA-N	CC1ON=C(C2C(Cl)=CC=CC=2Cl)C=1C(N)=S		CC1ON=C(C2C(Cl)=CC=CC=2Cl)C=1C(N)=S	175204-43-0	3-(2,6-Dichlorophenyl)-5-methyl-1,2-oxazole-4-carbothioamide	287.171	-74.2301	33.0796	Organic compounds	Benzenoids	Benzene and substituted derivatives	Halobenzenes			0.99478	-0.571758	3.20358	0.723674			0.698155	-0.85814	2.0509	0.705031
ABIBJGOSWOUGGV-UHFFFAOYSA-N	CN(C)C1=CC=CC=C1NC(=O)NC1=CC=CC=C1N(C)C		CN(C)C1=CC=CC=C1NC(=O)NC1=CC=CC=C1N(C)C	94201-83-9	1,3-Bis(2-(dimethylamino)phenyl)urea	298.39	-87.2051	-40.4445	Organic compounds	Benzenoids	Benzene and substituted derivatives	N-phenylureas			1.41716	-0.0224179	2.41933	0.656047			1.01888	-0.23248	2.32079	0.652151
ABICJYZKIYUWEE-UHFFFAOYSA-N	[O-][N+](=O)c1c(O)[nH]c(=O)[nH]c1=O		[O-][N+](=O)c1c(O)[nH]c(=O)[nH]c1=O	480-68-2	2,4,6(1H,3H,5H)-Pyrimidinetrione, 5-nitro-	173.084	-115.709	28.4742	Organic compounds	Organic acids and derivatives	Carboxylic acids and derivatives	Amino acids, peptides, and analogues			1.80857	0.122344	2.54137	0.715024			1.10028	-0.823404	2.6376	0.729669
ABIKQXWLJOURPN-UHFFFAOYSA-N	CSCCC(C)C		CSCCC(C)C	13286-90-3	5-Methyl-2-thiahexane	118.245	120.244	-88.1632	Organic compounds	Organosulfur compounds	Thioethers	Dialkylthioethers			1.3588	0.1887	2.26303	0.662376			0.828227	-0.876302	2.0069	0.660032
ABITWCWTLOLPCV-UHFFFAOYSA-N	C1=CC(=CC=C1C1C=CC=CC=1)[Si](C1C=CC(=CC=1)C1C=CC=CC=1)(C1C=CC(=CC=1)C1C=CC=CC=1)C1C=CC(=CC=1)C1C=CC=CC=1		C1=CC(=CC=C1C1C=CC=CC=1)[Si](C1C=CC(=CC=1)C1C=CC=CC=1)(C1C=CC(=CC=1)C1C=CC=CC=1)C1C=CC(=CC=1)C1C=CC=CC=1	3352-54-3	["Silane, tetrakis([1,1'-biphenyl]-4-yl)-"]	640.902	-65.3746	28.9262	Organic compounds	Benzenoids	Benzene and substituted derivatives	Biphenyls and derivatives			1.93023	-0.161824	2.79987	0.580174			1.64298	-2.99767	3.2505	0.614936
ABIUHPWEYMSGSR-UHFFFAOYSA-N	CC1C=C(C=C(Br)C=1O)C1(OS(=O)(=O)C2=CC=CC=C12)C1C=C(C)C(O)=C(Br)C=1		CC1C=C(C=C(Br)C=1O)C1(OS(=O)(=O)C2=CC=CC=C12)C1C=C(C)C(O)=C(Br)C=1	115-40-2	Bromcresol Purple	540.229	-118.152	114.36	Organic compounds	Organoheterocyclic compounds	Benzofurans	Benzofuranones			1.39725	-0.879246	2.54321	0.733383			0.979956	-2.49401	2.502	0.760826
ABIVFLSDGLSYTC-UHFFFAOYSA-N	COC(=O)CCCCCCCC(OC(=O)C(F)(F)F)C(CCCCCCCC)OC(=O)C(F)(F)F		COC(=O)CCCCCCCC(OC(=O)C(F)(F)F)C(CCCCCCCC)OC(=O)C(F)(F)F	21987-19-9	Methyl 9,10-bis[(trifluoroacetyl)oxy]octadecanoate	522.523	105.413	-28.929	Organic compounds	Organic acids and derivatives	Carboxylic acids and derivatives	Tricarboxylic acids and derivatives			1.71049	-0.274489	2.69754	0.424908			1.15585	-1.40994	2.63152	0.460199
ABIVOOWWGYJNLV-JTQLQIEISA-N	NC(=O)C1CCCCC2C3=CC(Cl)=CC=C3NC=21		NC(=O)C1CCCCC2C3=CC(Cl)=CC=C3NC=21	848193-72-6	(6S)-2-chloro-5,6,7,8,9,10-hexahydrocyclohepta[b]indole-6-carboxamide	262.74	-83.5266	86.1669	Organic compounds	Organoheterocyclic compounds	Indoles and derivatives	Indoles			1.25137	-0.344882	3.66343	0.754625			0.940544	-0.356913	2.19671	0.711491
ABIVOOWWGYJNLV-UHFFFAOYSA-N	NC(=O)C1CCCCC2C3=CC(Cl)=CC=C3NC=21		NC(=O)C1CCCCC2C3=CC(Cl)=CC=C3NC=21	371219-74-8	2-chloro-5,6,7,8,9,10-hexahydrocyclohepta[b]indole-6-carboxamide	262.74	-83.5267	86.1674	Organic compounds	Organoheterocyclic compounds	Indoles and derivatives	Indoles			1.25137	-0.344882	3.66343	0.754625			0.940544	-0.356913	2.19671	0.711491
ABJFBJGGLJVMAQ-UHFFFAOYSA-N	O=c1[nH]c2ccccc2[nH]c1=O		O=c1[nH]c2ccccc2[nH]c1=O	15804-19-0	2,3-Quinoxalinedione, 1,4-dihydro-	162.148	-88.8954	71.3661	Organic compounds	Organoheterocyclic compounds	Diazanaphthalenes	Benzodiazines			1.70683	0.479293	2.5269	0.624974			1.48741	-0.0804073	2.47758	0.603718
ABJGYUSFOIMJPT-UHFFFAOYSA-N	CC(C)C1=CC=CC=C1CCl		CC(C)C1=CC=CC=C1CCl	20034-71-3	Benzene, 1-(chloromethyl)-2-(1-methylethyl)-	168.667	-77.1444	-23.9157	Organic compounds	Benzenoids	Benzene and substituted derivatives	Cumenes			1.41975	0.0556837	2.40323	0.573268			1.03581	-0.695974	2.85216	0.585063
ABJHFLQQJHYWIC-UHFFFAOYSA-N	OC(COC=O)COC=O		OC(COC=O)COC=O	10303-53-4	(3-formyloxy-2-hydroxypropyl) formate	148.114	124.939	-59.5649	Organic compounds	Lipids and lipid-like molecules	Glycerolipids	Diradylglycerols			2.04448	0.748046	2.70765	0.681314			1.86117	0.330314	2.89398	0.746131
ABJKIHHNDMEBNA-UHFFFAOYSA-N	Cc1coc2ccccc2c1=O		Cc1coc2ccccc2c1=O	85-90-5	Methylchromone	160.172	-89.3451	117.864	Organic compounds	Organoheterocyclic compounds	Benzopyrans	1-benzopyrans			1.73039	0.735043	2.33614	0.705015			1.30762	0.00846	2.38154	0.687443
ABJKWBDEJIDSJZ-UHFFFAOYSA-N	CN(CC1C=CC(=CC=1)C(C)(C)C)CC1=CC=CC2=CC=CC=C12		CN(CC1C=CC(=CC=1)C(C)(C)C)CC1=CC=CC2=CC=CC=C12	101828-21-1	Butenafine	317.476	-86.2125	-28.4883	Organic compounds	Benzenoids	Naphthalenes				1.37228	-0.0782799	2.35052	0.704921			0.794866	-0.255766	2.10988	0.694599
ABJMNVCTWJQTJZ-UHFFFAOYSA-N	CC(COC(=O)C1=CC=CC=C1C(=O)OCC(C)CCC(C)CC)CCC(C)CC		CC(COC(=O)C1=CC=CC=C1C(=O)OCC(C)CCC(C)CC)CCC(C)CC	85391-48-6	Bis(2,5-dimethylheptyl) benzene-1,2-dicarboxylate	418.618	8.42531	-72.0339	Organic compounds	Benzenoids	Benzene and substituted derivatives	Benzoic acids and derivatives			1.68099	0.050203	2.45061	0.431829			1.36284	0.323632	2.26723	0.431829
ABJNFGKXRLXHAJ-UHFFFAOYSA-N	COC1C=C2CCC3C=NOC=3C2=CC=1		COC1C=C2CCC3C=NOC=3C2=CC=1	62324-90-7	4,5-Dihydronaphtho(2,1-d)isoxazol-7-yl methyl ether	201.225	-27.0385	90.3464	Organic compounds	Benzenoids	Naphthalenes				1.37599	-0.586745	2.25543	0.713248			0.891816	-0.782057	2.10043	0.701296
ABJOFFUIJZDZBE-UHFFFAOYSA-N	CC1C=C(OCC)C(=CC=1)OCC		CC1C=C(OCC)C(=CC=1)OCC	2612-56-8	3,4-Diethoxytoluene	180.247	-51.2036	-7.31272	Organic compounds	Benzenoids	Phenol ethers				1.5532	0.256123	2.30393	0.642725			1.2028	-0.345619	2.1146	0.640933
ABJQKDJOYSQVFX-UHFFFAOYSA-N	NC1=CC=C(O)C2=CC=CC=C21		NC1=CC=C(O)C2=CC=CC=C21	2834-90-4	4-Amino-1-naphthol	159.188	-114.628	38.0221	Organic compounds	Benzenoids	Naphthalenes	Naphthols and derivatives			1.4207	0.39689	2.21965	0.601583			1.04235	-0.412348	2.12529	0.54141
ABJVUPUJUGBUMM-UHFFFAOYSA-N	CCCCCC1C=CN=CC=1		CCCCCC1C=CN=CC=1	2961-50-4	4-Pentylpyridine	149.237	-25.542	-87.9593	Organic compounds	Organoheterocyclic compounds	Pyridines and derivatives				1.39394	-0.636033	2.18182	0.463187			0.518247	-0.629683	1.95313	0.56862
ABKDQIYZBHXIDA-UHFFFAOYSA-N	OC(=O)C1C(C2C3=CC=C(O)C=C3OC3=CC(O)=CC=C32)=C(Br)C(Br)=C(Br)C=1Br		OC(=O)C1C(C2C3=CC=C(O)C=C3OC3=CC(O)=CC=C32)=C(Br)C(Br)=C(Br)C=1Br	500533-91-5	NSC119889	649.911	-67.0616	-4.46667	Organic compounds	Organoheterocyclic compounds	Benzopyrans	1-benzopyrans			1.75122	-1.16144	2.77891	0.703571			0.933529	-4.78153	2.49555	0.762169
ABKKSPPWUYAREL-NZPOWLKHSA-N	CC1CC2CC(O)CCC2(C)C2CCC3(C)C(CCC3O)C12		CC1CC2CC(O)CCC2(C)C2CCC3(C)C(CCC3O)C12	7642-54-8	7alpha-Methyl-5alpha-androstane-3beta,17beta-diol	306.49	103.585	118.963	Organic compounds	Lipids and lipid-like molecules	Steroids and steroid derivatives	Androstane steroids			2.01239	-3.12332	2.64561	0.723427			0.732038	-3.37242	2.40129	0.734525
ABKLHMFETKGKJI-UHFFFAOYSA-N	COC1=CC(=CC=C1CNC(CC)CC)OC		COC1=CC(=CC=C1CNC(CC)CC)OC	416891-71-9	(2,4-dimethoxybenzyl)(1-ethylpropyl)amine	237.343	-31.3358	104.577	Organic compounds	Benzenoids	Benzene and substituted derivatives	Methoxybenzenes			1.37842	0.0146415	2.31957	0.707158			0.978482	-0.583739	2.21905	0.706205
ABKMQSRPKFUWEH-UHFFFAOYSA-N	C=COC(=O)C(F)(F)C(F)(F)C(F)(F)C(F)(F)F		C=COC(=O)C(F)(F)C(F)(F)C(F)(F)C(F)(F)F	424-37-3	Ethenyl perfluoropentanoate	290.081	4.9403	-138.47	Organic compounds	Organohalogen compounds	Alkyl halides	Alkyl fluorides			1.41249	-0.689157	2.49915	0.607225			0.782439	-1.30481	1.94808	0.619048
ABKNSSSQNATKAE-UHFFFAOYSA-M	[Cl-].OCCCC1C=C[N+](=CC=1)C(=O)C1CNCCO1	[Cl-]	OCCCC1C=C[N+](=CC=1)C(=O)C1CNCCO1	63629-89-0	4-(3-Hydroxypropyl)-1-(morpholine-2-carbonyl)pyridin-1-ium chloride	251.306	26.3072	14.9416	Organic compounds	Organic acids and derivatives	Carboxylic acids and derivatives	Amino acids, peptides, and analogues			1.71426	-0.190386	2.51317	0.771196			1.02769	-0.891669	2.4411	0.800449
ABKPAQVSXGDAOP-UHFFFAOYSA-N	CC(CCOC(=O)C(C)(C)C)CCOC(=O)C(C)(C)C		CC(CCOC(=O)C(C)(C)C)CCOC(=O)C(C)(C)C	762268-77-9	Methylpentanediol dineopentanoate	286.412	121.597	-21.1966	Organic compounds	Organic acids and derivatives	Carboxylic acids and derivatives	Dicarboxylic acids and derivatives			2.01949	0.660062	2.6637	0.474789			1.6561	0.175914	2.53664	0.584114
ABKUUFDCAHYSCG-UHFFFAOYSA-N	CN(C)CCC1=CC2=CC(CN3C=NC=N3)=CC=C2N1		CN(C)CCC1=CC2=CC(CN3C=NC=N3)=CC=C2N1	208941-96-2	N,N-Dimethyl-5-(1H-1,2,4-triazol-1-ylmethyl)-1H-indole-2-ethanamine	269.352	-44.8543	122.538	Organic compounds	Organoheterocyclic compounds	Indoles and derivatives	Indoles			1.33807	-0.296834	2.34432	0.708449			0.869119	-0.458593	2.28738	0.707189
ABLACSIRCKEUOB-UHFFFAOYSA-N	Cc1cc(=O)c2c3c1c(O)cc1c3c3c(c(=O)cc(O)c3=C(O)C1(C)C)c2O		Cc1cc(=O)c2c3c1c(O)cc1c3c3c(c(=O)cc(O)c3=C(O)C1(C)C)c2O	20004-62-0	Geliomycin	376.364	-80.054	136.155	Organic compounds	Benzenoids	Phenanthrenes and derivatives	Phenanthrols			2.0823	-0.921093	2.75566	0.788589			1.47483	-3.29983	2.6098	0.796745
ABLULJUGVQLKDY-UHFFFAOYSA-N	CC(C)(C)C1=CC=CC(C2CCCC2)=C1O		CC(C)(C)C1=CC=CC(C2CCCC2)=C1O	93892-31-0	6-tert-Butyl-2-cyclopentylphenol	218.34	18.4304	24.8103	Organic compounds	Benzenoids	Benzene and substituted derivatives	Phenylpropanes			1.48146	0.301423	2.26382	0.601524			0.915726	-0.67557	2.00957	0.618357
ABLZOLAUBUSUHT-UHFFFAOYSA-N	BrC1=CC(=CC(Br)=C1)OC1C(Br)=C(Br)C(Br)=C(Br)C=1Br		BrC1=CC(=CC(Br)=C1)OC1C(Br)=C(Br)C(Br)=C(Br)C=1Br	407578-53-4	1,2,3,4,5-Pentabromo-6-(3,5-dibromophenoxy)benzene	722.483	-130.609	-97.0209	Organic compounds	Benzenoids	Benzene and substituted derivatives	Diphenylethers			0.00405362	-0.915768	2.2236	0.60305			0.00325731	-4.4874	1.79508	0.671247
ABMDIECEEGFXNC-UHFFFAOYSA-N	CCC(=O)NCC		CCC(=O)NCC	5129-72-6	N-Ethylpropionamide	101.149	60.0715	-52.1556	Organic compounds	Organic acids and derivatives	Carboxylic acids and derivatives	Carboxylic acid derivatives			1.83003	0.669097	2.42797	0.661075			1.31358	0.0502021	2.4979	0.667305
ABMFBCRYHDZLRD-UHFFFAOYSA-N	OC(=O)C1=CC=C(C2=CC=CC=C21)C(O)=O		OC(=O)C1=CC=C(C2=CC=CC=C21)C(O)=O	605-70-9	1,4-Naphthalenedicarboxylic acid	216.192	-60.2406	-11.4995	Organic compounds	Benzenoids	Naphthalenes	Naphthalenecarboxylic acids and derivatives			1.90196	0.793028	2.65025	0.42983			1.55437	0.140754	2.58752	0.433949
ABMFUZRWANUQNU-UHFFFAOYSA-N	CN(C)S(=O)(=O)OC1C=CC(=CC=1)[N+]([O-])=O		CN(C)S(=O)(=O)OC1C=CC(=CC=1)[N+]([O-])=O	1142-27-4	4-Nitrophenyl dimethylsulfamate	246.244	-127.429	-10.1751	Organic compounds	Benzenoids	Benzene and substituted derivatives	Nitrobenzenes			1.82701	0.0852568	2.52945	0.592745			0.802884	-0.728668	2.38612	0.572723
ABMGECRLBPHGSD-UHFFFAOYSA-N	CCCCCCOCCCCC		CCCCCCOCCCCC	32357-83-8	1-(Pentyloxy)hexane	172.312	110.162	-66.4273	Organic compounds	Organic oxygen compounds	Organooxygen compounds	Ethers			2.24032	1.33759	2.79672	0.271228			1.91616	0.512168	2.74064	0.369774
ABMKWMASVFVTMD-UHFFFAOYSA-N	CC1=CC=CC=C1C1=CC=CC=C1C		CC1=CC=CC=C1C1=CC=CC=C1C	605-39-0	["1,1'-Biphenyl, 2,2'-dimethyl-"]	182.266	-80.6453	10.1284	Organic compounds	Benzenoids	Benzene and substituted derivatives	Biphenyls and derivatives			1.43563	-0.110159	2.23645	0.586338			1.27365	-0.414678	2.1556	0.491955
ABMPSIRCVCUHLO-UHFFFAOYSA-N	CC1C=C(C(O)=C(Br)C=1)[N+]([O-])=O		CC1C=C(C(O)=C(Br)C=1)[N+]([O-])=O	20039-91-2	2-Bromo-4-methyl-6-nitrophenol	232.033	-141.422	15.8391	Organic compounds	Benzenoids	Phenols	Nitrophenols			1.08281	-0.568179	2.3501	0.617244			0.745504	-0.633737	2.25481	0.593506
ABMQTMNKACFCFY-UHFFFAOYSA-N	CC1(C)C(CCC1(C)C(O)=O)C(=O)NC1C=CC(=CC=1)OCC		CC1(C)C(CCC1(C)C(O)=O)C(=O)NC1C=CC(=CC=1)OCC	7153-49-3	3-[(4-ethoxyphenyl)carbamoyl]-1,2,2-trimethylcyclopentanecarboxylic acid	319.401	30.0468	22.6214	Organic compounds	Benzenoids	Benzene and substituted derivatives	Anilides			1.67737	0.199859	2.55043	0.684771			0.889303	-1.87821	2.40615	0.696265
ABMULKFGWTYIIK-UHFFFAOYSA-N	CCCCCCC1=CC=CC=C1O		CCCCCCC1=CC=CC=C1O	3226-32-2	Phenol, o-hexyl-	178.275	-31.5003	-96.2302	Organic compounds	Benzenoids	Phenols	1-hydroxy-4-unsubstituted benzenoids			1.40328	0.00692657	2.1901	0.365206			1.36586	-0.0753264	2.19791	0.43711
ABMVPHQMDUVUSM-UHFFFAOYSA-N	COC1=CC=C(C=C1OC)C1C(=O)C2=CC=CC=C2C1=O		COC1=CC=C(C=C1OC)C1C(=O)C2=CC=CC=C2C1=O	1470-38-8	2-(3,4-Dimethoxyphenyl)-1H-indene-1,3(2H)-dione	282.295	-49.471	71.5829	Organic compounds	Benzenoids	Indanes	Indanones			1.8351	0.140037	2.75794	0.688975			1.30405	-0.228108	2.59969	0.677724
ABMVTYGGTMHHTN-UHFFFAOYSA-N	NC(CCC1C=CC=CC=1)C1C=CC=CC=1		NC(CCC1C=CC=CC=1)C1C=CC=CC=1	5689-74-7	1,3-Diphenylpropan-1-amine	211.308	-3.03407	-57.0925	Organic compounds	Phenylpropanoids and polyketides	Linear 1,3-diarylpropanoids				1.30878	-0.454474	2.25307	0.615586			1.02809	-0.270012	2.27874	0.655388
ABNCIWHCOXTEEZ-UHFFFAOYSA-N	CC=CCC(CC=CC)C1C=CN=CC=1		CC=CCC(CC=CC)C1C=CN=CC=1	2057-34-3	Pyridine, 4-[1-(2-butenyl)-3-pentenyl]-	201.313	-50.0912	-59.8254	Organic compounds	Organoheterocyclic compounds	Pyridines and derivatives				1.29246	-0.535691	2.22056	0.792366			0.70674	-0.434397	1.99388	0.792667
ABNDFSOIUFLJAH-UHFFFAOYSA-N	N#CSCC1C=CC=CC=1		N#CSCC1C=CC=CC=1	3012-37-1	Benzyl thiocyanate	149.218	-46.825	-74.5591	Organic compounds	Benzenoids	Benzene and substituted derivatives	Benzyl thiocyanates			0.891057	-0.589117	1.93739	0.623744			0.509707	-0.717929	1.8543	0.631101
ABNKHLJAVYVWBF-UHFFFAOYSA-N	CSc1[nH]c2[nH]c(=O)[nH]c2c(=O)[n]1		CSc1[nH]c2[nH]c(=O)[nH]c2c(=O)[n]1	14443-37-9	6,8-DIHYDROXY-2-METHYLMERCAPTOPURINE	198.207	-20.8623	31.8134	Organic compounds	Organoheterocyclic compounds	Imidazopyrimidines	Purines and purine derivatives			1.06135	-0.501727	2.27537	0.792523			0.834061	-0.644699	2.25684	0.781267
ABNPJVOPTXYSQW-UHFFFAOYSA-N	CCCCC(C)S		CCCCC(C)S	1679-06-7	2-Hexanethiol	118.245	130.642	-91.841	Organic compounds	Organosulfur compounds	Thiols	Alkylthiols			1.27288	0.215894	2.13554	0.600311			0.741487	-0.884665	2.30828	0.600311
ABNQGNFVSFKJGI-UHFFFAOYSA-N	FC(F)(F)C1C=C(Cl)C(Cl)=NC=1		FC(F)(F)C1C=C(Cl)C(Cl)=NC=1	69045-84-7	2,3-Dichloro-5-(trifluoromethyl)pyridine	215.989	-73.8689	-40.2586	Organic compounds	Organoheterocyclic compounds	Pyridines and derivatives	Halopyridines			1.01301	-0.709834	2.30106	0.666001	0.431893	0.431893	0.495399	-1.89248	1.56712	0.488231
ABNQSLSOFYAGHU-UHFFFAOYSA-N	CC(=O)C1=CC(=CC=C1)OC(=O)N(C)CC		CC(=O)C1=CC(=CC=C1)OC(=O)N(C)CC	855300-09-3	3-Acetylphenyl ethyl(methyl)carbamate	221.256	-22.7646	-26.8548	Organic compounds	Organic oxygen compounds	Organooxygen compounds	Carbonyl compounds			1.65744	0.385876	2.45577	0.636323			0.920727	-0.420759	2.22783	0.631941
ABOHYNBXDJHVHB-UHFFFAOYSA-N	NC1=C(C(C#N)=NN1C1C(Cl)=CC(=CC=1Cl)C(F)(F)F)S(O)(=O)=O		NC1=C(C(C#N)=NN1C1C(Cl)=CC(=CC=1Cl)C(F)(F)F)S(O)(=O)=O	209248-72-6	5-Amino-3-cyano-1-[2,6-dichloro-4-(trifluoromethyl)phenyl]-1H-pyrazole-4-sulfonic acid	401.153	-100.023	-27.1336	Organic compounds	Organoheterocyclic compounds	Azoles	Pyrazoles			1.75963	-0.558093	2.60942	0.606209			-0.0119363	-2.29532	2.02264	0.590904
ABOOPXYCKNFDNJ-JTQLQIEISA-N	CC(OC1C=CC(=CC=1)OC1C=NC2=CC(Cl)=CC=C2N=1)C(O)=O		CC(OC1C=CC(=CC=1)OC1C=NC2=CC(Cl)=CC=C2N=1)C(O)=O	100760-08-5	S-Quizalofop-acid	344.754	-60.5313	-115.025	Organic compounds	Benzenoids	Benzene and substituted derivatives	2-phenoxypropionic acids			1.24096	-0.372248	2.50208	0.536315			0.763727	-0.622815	2.25642	0.481213
ABOOPXYCKNFDNJ-SNVBAGLBSA-N	CC(OC1C=CC(=CC=1)OC1C=NC2=CC(Cl)=CC=C2N=1)C(O)=O		CC(OC1C=CC(=CC=1)OC1C=NC2=CC(Cl)=CC=C2N=1)C(O)=O	94051-08-8	Quizalofop-p	344.754	-60.5297	-115.023	Organic compounds	Benzenoids	Benzene and substituted derivatives	2-phenoxypropionic acids			1.24096	-0.372248	2.50208	0.536315			0.763727	-0.622815	2.25642	0.481213
ABOOPXYCKNFDNJ-UHFFFAOYSA-N	CC(OC1C=CC(=CC=1)OC1C=NC2=CC(Cl)=CC=C2N=1)C(O)=O		CC(OC1C=CC(=CC=1)OC1C=NC2=CC(Cl)=CC=C2N=1)C(O)=O	76578-12-6	Quizalofop	344.754	-60.531	-115.024	Organic compounds	Benzenoids	Benzene and substituted derivatives	2-phenoxypropionic acids			1.24096	-0.372248	2.50208	0.536315			0.763727	-0.622815	2.25642	0.481213
ABOQUUWIIIVSEK-UHFFFAOYSA-N	CC1(C)COP(=O)(OP2(=O)OCC(C)(C)CO2)OC1		CC1(C)COP(=O)(OP2(=O)OCC(C)(C)CO2)OC1	4090-52-2	["2,2'-Oxybis(5,5-dimethyl-1,3,2-dioxaphosphorinane) 2,2'-dioxide"]	314.211	136.673	53.4957	Organic compounds	Organic oxygen compounds	Organic oxoanionic compounds	Organic pyrophosphates			1.40661	-1.0511	2.50624	0.787127			0.935753	-1.69968	2.33871	0.840071
ABORRGDTJNGTLT-UHFFFAOYSA-N	C[N+](C)(CCCNC(=O)C(F)(F)C(F)(F)C(F)(F)C(F)(F)C(F)(F)C(F)(F)C(F)(F)C(F)(F)C(F)(F)C(F)(F)C(F)(F)C(F)(F)F)CC([O-])=O		C[N+](C)(CCCNC(=O)C(F)(F)C(F)(F)C(F)(F)C(F)(F)C(F)(F)C(F)(F)C(F)(F)C(F)(F)C(F)(F)C(F)(F)C(F)(F)C(F)(F)F)CC([O-])=O	167997-08-2	[(Perfluorotridecanoyl)amino]-3-betaine	806.301	-4.76104	-132.009	Organic compounds	Organic acids and derivatives	Carboxylic acids and derivatives	Amino acids, peptides, and analogues			-0.525235	-0.765126	2.30836	0.625684			0.664213	-2.31146	2.67035	0.666174
ABOVRDBEJDIBMZ-UHFFFAOYSA-N	O=C(NC1C=C(C(Cl)=CC=1)C(F)(F)F)NC1C=C(C(Cl)=CC=1)C(F)(F)F		O=C(NC1C=C(C(Cl)=CC=1)C(F)(F)F)NC1C=C(C(Cl)=CC=1)C(F)(F)F	370-50-3	N,Nâ€²-Bis[4-chloro-3-(trifluoromethyl)phenyl]urea	417.136	-85.5007	-49.6535	Organic compounds	Benzenoids	Benzene and substituted derivatives	N-phenylureas			1.04188	-0.540626	2.32002	0.576717			0.353992	-2.32349	1.98499	0.568527
ABOYDMHGKWRPFD-UHFFFAOYSA-N	NS(=O)(=O)CC1C=CC=CC=1		NS(=O)(=O)CC1C=CC=CC=1	4563-33-1	Benzenemethanesulfonamide	171.221	-47.9045	-78.4155	Organic compounds	Benzenoids	Benzene and substituted derivatives				1.60366	0.495008	2.35564	0.603701			1.50979	-0.0631876	2.49047	0.626667
ABOZFWQFQKINJF-UHFFFAOYSA-N	CCS(=O)(=O)C1C=CC(=CC=1)C(O)C1C=CC=CC=1		CCS(=O)(=O)C1C=CC(=CC=1)C(O)C1C=CC=CC=1	94231-70-6	[4-(Ethanesulfonyl)phenyl](phenyl)methanol	276.357	-117.021	-45.2835	Organic compounds	Benzenoids	Benzene and substituted derivatives	Diphenylmethanes			1.66938	0.13057	2.48554	0.648336			1.23263	-0.341968	2.47867	0.647066
ABPBVCKGWWGZDP-UHFFFAOYSA-N	FC1(F)C(F)(F)C(Cl)=C(Cl)C1(F)F		FC1(F)C(F)(F)C(Cl)=C(Cl)C1(F)F	706-79-6	1,2-Dichlorohexafluorocyclopentene	244.949	37.2354	-32.6734	Organic compounds	Organohalogen compounds	Vinyl halides	Vinyl chlorides			0.754591	-1.23169	2.40224	0.773873			0.241743	-1.87042	2.11871	0.772906
ABPFCLBHEOJRTQ-UHFFFAOYSA-N	Cl.CC(CC(=O)NC1=CC=C(Cl)C=C1Cl)N1CCCCC1	Cl	CC(CC(=O)NC1=CC=C(Cl)C=C1Cl)N1CCCCC1	93940-33-1	N-(2,4-Dichlorophenyl)-3-(piperidin-1-yl)butanimidic acid--hydrogen chloride (1/1)	315.244	-87.0965	-46.1223	Organic compounds	Organic acids and derivatives	Carboxylic acids and derivatives	Amino acids, peptides, and analogues			1.23044	-0.0738027	2.20967	0.663732			0.67496	-0.351284	2.10488	0.663732
ABPKANCPBHXONL-UHFFFAOYSA-N	CCC1C=C(C=O)SC=1		CCC1C=C(C=O)SC=1	21426-18-6	4-Ethylthiophene-2-carbaldehyde	140.207	-63.4314	-29.2209	Organic compounds	Organic oxygen compounds	Organooxygen compounds	Carbonyl compounds			1.0518	-0.415235	2.56267	0.731986			0.742315	-0.633691	1.86083	0.748284
ABPKZRFIDANJLM-UHFFFAOYSA-M	[Na+].CC(C)(CS(=O)(=O)C1=CC=C(C=C1)N1CCC(=N1)C1C=CC(Cl)=CC=1)S([O-])(=O)=O	[Na+]	CC(C)(CS(=O)(=O)C1=CC=C(C=C1)N1CCC(=N1)C1C=CC(Cl)=CC=1)S(O)(=O)=O	58370-37-9	2-Propanesulfonic acid, 1-[[4-[3-(4-chlorophenyl)-4,5-dihydro-1H-pyrazol-1-yl]phenyl]sulfonyl]-2-methyl-, sodium salt (1:1)	456.973	-117.229	-62.9123	Organic compounds	Benzenoids	Benzene and substituted derivatives	Benzenesulfonyl compounds			1.77277	-0.333067	2.63718	0.74283			1.20369	-0.225437	2.50494	0.751966
ABPOVAJYXVTDRD-UHFFFAOYSA-N	CC1CC(=O)NC1(C(=O)OCC)C(=O)OCC		CC1CC(=O)NC1(C(=O)OCC)C(=O)OCC	2446-12-0	MLS002638794	243.259	89.6629	21.1516	Organic compounds	Organic acids and derivatives	Carboxylic acids and derivatives	Amino acids, peptides, and analogues			1.93332	0.223047	2.61707	0.691221			1.53164	-0.513411	2.89242	0.708125
ABQHEOOQTBHUHE-UHFFFAOYSA-M	[K+].[O-]S(=O)(=O)OOOC(=O)C1C=CC=CC=1	[K+]	OS(=O)(=O)OOOC(=O)C1C=CC=CC=1	3586-17-2	Potassium benzoylperoxymonosulphate	234.185	-30.4669	-31.218	Organic compounds	Benzenoids	Benzene and substituted derivatives	Benzoic acids and derivatives			1.84713	-0.00047361	2.59589	0.539864			1.52049	-0.665386	2.6365	0.537041
ABQHJSHFFLAGHF-UHFFFAOYSA-N	O=CC1C=C(C=CC=1)OC1C=C(Cl)C(Cl)=CC=1		O=CC1C=C(C=CC=1)OC1C=C(Cl)C(Cl)=CC=1	79124-76-8	3-(3,4-Dichlorophenoxy)benzaldehyde	267.111	-56.6664	-40.7154	Organic compounds	Benzenoids	Benzene and substituted derivatives	Diphenylethers			1.09266	-0.605273	2.07626	0.691551			0.739496	-0.346677	1.94512	0.601361
ABQHPGHMYXJJIV-MRVPVSSYSA-N	CCOC1=CC(Cc2[s]c(=S)[n](CC(O)=O)c2O)=C(Br)C(Br)=C1O		CCOC1=CC(Cc2[s]c(=S)[n](CC(O)=O)c2O)=C(Br)C(Br)=C1O	1135242-20-4	(5R)-5-[(2,3-Dibromo-5-ethoxy-4-hydroxyphenyl)methyl]-4-oxo-2-thioxo-3-thiazolidineacetic acid	499.202	5.36365	30.2416	Organic compounds	Organic acids and derivatives	Carboxylic acids and derivatives	Amino acids, peptides, and analogues			1.48382	-1.15366	2.65408	0.761768			0.879923	-2.32601	2.47204	0.773524
ABQIAHFCJGVSDJ-UHFFFAOYSA-N	O=C(C(F)(C(F)(F)F)C(F)(F)F)C(F)(F)F		O=C(C(F)(C(F)(F)F)C(F)(F)F)C(F)(F)F	756-12-7	1,1,1,3,4,4,4-Heptafluoro-3-(trifluoromethyl)butan-2-one	266.034	9.67992	-130.755	Organic compounds	Organic oxygen compounds	Organooxygen compounds	Carbonyl compounds			1.50814	-0.719917	2.46355	0.690015			0.820031	-1.23991	2.00122	0.681344
ABQKHKWXTUVKGF-UHFFFAOYSA-N	CC1=CC=C(C=C1)N=C=S		CC1=CC=C(C=C1)N=C=S	622-59-3	Isothiocyanic acid, 4-tolyl ester	149.218	-109.528	-25.5686	Organic compounds	Benzenoids	Benzene and substituted derivatives	Toluenes			1.0217	-0.595977	3.17058	0.654917			0.68519	-0.501073	1.86003	0.632695
ABQKYBVDVAXVNO-UHFFFAOYSA-N	OC(=O)c1c[nH]c2cc(ccc2c1=O)OCC1C=CC=CC=1		OC(=O)c1c[nH]c2cc(ccc2c1=O)OCC1C=CC=CC=1	17825-22-8	NSC306960	295.294	-54.7002	118.253	Organic compounds	Organoheterocyclic compounds	Quinolines and derivatives	Quinoline carboxylic acids			1.91047	0.623104	2.57547	0.661501			1.61504	0.188789	2.96559	0.655138
ABQLAMJAQZFPJI-UHFFFAOYSA-N	CCCCCCCC1CCOC1=O		CCCCCCCC1CCOC1=O	2983-21-3	2(3h)-furanone, 3-heptyldihydro-	184.279	120.559	31.2694	Organic compounds	Organoheterocyclic compounds	Lactones	Gamma butyrolactones			2.12941	1.16148	2.6609	0.53881			1.57618	0.430506	2.6481	0.552834
ABQPEYRVNHDPIO-UHFFFAOYSA-N	CB(C)Br		CB(C)Br	5158-50-9	Dimethylboronbromide	120.786	71.3787	-9.69715	Organic compounds	Organometallic compounds	Organometalloid compounds	Organoboron compounds			0.926207	-0.715193	2.46311	0.854762			0.778184	-0.696563	2.5266	0.814286
ABQQFYPRVNNXNU-UHFFFAOYSA-N	CCCCOC(=O)C(Cl)C(Cl)=C(Cl)Cl		CCCCOC(=O)C(Cl)C(Cl)=C(Cl)Cl	2892-61-7	Butyl 2,3,4,4-tetrachlorobut-3-enoate	279.978	126.083	-12.0528	Organic compounds	Lipids and lipid-like molecules	Fatty Acyls	Fatty acid esters			1.41054	-0.492989	2.59859	0.567476			0.928016	-1.41958	2.22041	0.591658
ABQUUVRUHRHFHR-UHFFFAOYSA-N	CC1=C(Cl)C=C(C(=C1Cl)[N+]([O-])=O)S(O)(=O)=O		CC1=C(Cl)C=C(C(=C1Cl)[N+]([O-])=O)S(O)(=O)=O	68368-40-1	Benzenesulfonic acid, 3,5-dichloro-4-methyl-2-nitro-	286.092	-145.138	2.77352	Organic compounds	Benzenoids	Benzene and substituted derivatives	Benzenesulfonic acids and derivatives			1.35964	-0.460369	2.48578	0.583335			0.927342	-0.842278	2.34766	0.663268
ABQYGDKEPFRUBO-UHFFFAOYSA-N	CC1(CCC2C=CC=CC=2)NC(=O)NC1=O		CC1(CCC2C=CC=CC=2)NC(=O)NC1=O	5472-90-2	5-Methyl-5-phenethyl-imidazolidine-2,4-dione	218.256	50.1886	69.2639	Organic compounds	Organoheterocyclic compounds	Azolidines	Imidazolidines			1.53153	0.235765	2.3749	0.626158			1.0204	-0.263022	2.5756	0.628175
ABQYZRZVRIPTPI-UHFFFAOYSA-N	CO[n]1cc(C(O)=O)c(=O)c2cc3OCOc3cc12		CO[n]1cc(C(O)=O)c(=O)c2cc3OCOc3cc12	37065-29-5	Miloxacin	263.205	-51.9839	149.864	Organic compounds	Organoheterocyclic compounds	Quinolines and derivatives	Quinoline carboxylic acids			1.76691	0.163477	2.51076	0.740463			1.07314	-0.628787	2.46309	0.758881
ABRBACLJPUACFC-UHFFFAOYSA-N	CC1(C)OC(=O)C(C)(C)NC1=O		CC1(C)OC(=O)C(C)(C)NC1=O	86366-52-1	3,3,6,6-Tetramethylmorpholine-2,5-dione	171.196	62.5227	69.8323	Organic compounds	Organic acids and derivatives	Carboxylic acids and derivatives	Amino acids, peptides, and analogues			1.91	0.689226	2.54486	0.755994			1.6214	-0.0279034	2.77803	0.753633
ABRDPORILGADAP-UHFFFAOYSA-N	ClC1=C(C=CC=C1Cl)OC1=CC=C(Cl)C(Cl)=C1Cl		ClC1=C(C=CC=C1Cl)OC1=CC=C(Cl)C(Cl)=C1Cl	160282-10-0	["2,2',3,3',4-Pentachlorodiphenylether"]	342.436	-100.863	-3.61929	Organic compounds	Benzenoids	Benzene and substituted derivatives	Diphenylethers			0.674703	-1.17377	2.24679	0.697083			-1.15241	-5.22685	1.10238	0.619467
ABRHAPVKULGVAO-UHFFFAOYSA-N	O=C1NC(=NC2C=C(Cl)C(=CC=2Cl)NC2=NC(=O)C3=CC=CC=C32)C2=CC=CC=C12		O=C1NC(=NC2C=C(Cl)C(=CC=2Cl)NC2=NC(=O)C3=CC=CC=C32)C2=CC=CC=C12	51016-63-8	["1H-Isoindol-1-one, 3,3'-[(2,5-dichloro-1,4-phenylene)diimino]bis-"]	435.27	-148.236	54.2065	Organic compounds	Organoheterocyclic compounds	Isoindoles and derivatives	Isoindolines			1.95704	0.116872	2.68889	0.730355			1.10996	-0.16495	2.59513	0.782671
ABRHSRPOYMSBOI-UHFFFAOYSA-N	ClC1N=CN=C2C=1OC1=CC=CC=C12		ClC1N=CN=C2C=1OC1=CC=CC=C12	39876-88-5	4-chlorobenzofuro[3,2-d]pyrimidine	204.616	-88.6184	115.338	Organic compounds	Organoheterocyclic compounds	Benzofurans				0.976269	-0.690487	2.29589	0.779267			0.784567	-1.97842	2.08888	0.715619
ABRIMXGLNHCLIP-UHFFFAOYSA-N	O=C1CCCC=CCCCCCCCCCC1		O=C1CCCC=CCCCCCCCCCC1	37609-25-9	5-Cyclohexadecen-1-one	236.399	70.6829	59.6346	Organic compounds	Organic oxygen compounds	Organooxygen compounds	Carbonyl compounds			2.03627	0.764303	2.6834	0.451282			1.66724	0.263502	2.61164	0.650182
ABROBCBIIWHVNS-UHFFFAOYSA-N	CCC1=CC=CC=C1S		CCC1=CC=CC=C1S	4500-58-7	Benzenethiol, 2-ethyl-	138.235	-75.6017	-24.7729	Organic compounds	Benzenoids	Thiophenols				1.21447	0.126387	2.91745	0.611549			0.689324	-0.699116	2.02489	0.597804
ABRVDWASZFDIEH-SCGRZTRASA-L	[Ca+2].CSCCC(O)C([O-])=O.CSCCC(O)C([O-])=O	[Ca+2]	CSCCC(O)C(O)=O	71597-87-0	Calcium bis((S)-2-hydroxy-4-(methylthio)butyrate)	150.199	43.5282	-58.4821	Organic compounds	Lipids and lipid-like molecules	Fatty Acyls	Fatty acids and conjugates			1.14475	-0.329638	2.49764	0.660161			0.972802	-0.748541	2.41497	0.683964
ABRVDWASZFDIEH-UHFFFAOYSA-L	[Ca+2].CSCCC(O)C([O-])=O.CSCCC(O)C([O-])=O	[Ca+2]	CSCCC(O)C(O)=O	4857-44-7	2-Hydroxy-4-(methylthio)-butanoic acid calcium salt (2:1)	150.199	43.5282	-58.4821	Organic compounds	Lipids and lipid-like molecules	Fatty Acyls	Fatty acids and conjugates			1.14475	-0.329638	2.49764	0.660161			0.972802	-0.748541	2.41497	0.683964
ABRVEWRGYHIKGN-UHFFFAOYSA-N	CC1=CC(=NN=C1NCCCC(O)=O)C1C=CC=CC=1		CC1=CC(=NN=C1NCCCC(O)=O)C1C=CC=CC=1	94477-20-0	4-[(4-Methyl-6-phenylpyridazin-3-yl)amino]butanoic acid	271.32	4.86526	51.0272	Organic compounds	Organic acids and derivatives	Carboxylic acids and derivatives	Amino acids, peptides, and analogues			1.70508	0.323036	2.45692	0.688357			1.09055	-0.247365	2.42984	0.707562
ABRVRWMUZLYYHR-UHFFFAOYSA-N	CC1=CC2C(=CC=CC=2OCC(O)CN2CCCCC2)N1		CC1=CC2C(=CC=CC=2OCC(O)CN2CCCCC2)N1	611204-94-5	1-[(2-methyl-1H-indol-4-yl)oxy]-3-piperidino-2-propanol	288.391	15.0599	47.1958	Organic compounds	Organoheterocyclic compounds	Indoles and derivatives	Indoles			1.39788	-0.330838	2.3432	0.762782			0.916326	-0.325359	2.25818	0.757576
ABRXECVGFQUVGO-UHFFFAOYSA-N	CC[n]1c(=S)[nH][n]c1C1C=CN=CC=1		CC[n]1c(=S)[nH][n]c1C1C=CN=CC=1	26029-01-6	4-ethyl-5-pyridin-4-yl-4h-[1,2,4]triazole-3-thiol	206.274	-50.2025	43.0926	Organic compounds	Organoheterocyclic compounds	Pyridines and derivatives	Pyridyltriazoles			0.791181	-0.479079	2.15799	0.786564			0.742197	-0.581143	2.02082	0.79528
ABSANOBAGBYLHY-UHFFFAOYSA-N	COC1=C2C=CC(C)(C)OC2=C(CCC(O)=O)C2OC(C)(C)C=CC=21		COC1=C2C=CC(C)(C)OC2=C(CCC(O)=O)C2OC(C)(C)C=CC=21	26535-35-3	Eriostoic acid	344.407	-63.7506	124.853	Organic compounds	Organoheterocyclic compounds	Benzopyrans	1-benzopyrans			1.70384	0.0850865	2.57765	0.762238			0.86352	-1.81115	2.45437	0.768187
ABSCYWMYRVUUIC-UHFFFAOYSA-N	CC1CC2C(CC1=O)C2(C)C		CC1CC2C(CC1=O)C2(C)C	13124-69-1	4,7,7-Trimethylbicyclo[4.1.0]heptan-3-one	152.237	83.021	69.4771	Organic compounds	Lipids and lipid-like molecules	Prenol lipids	Monoterpenoids			1.76164	0.576979	2.42324	0.754001			0.864409	-1.04154	2.0987	0.770415
ABSDZQDZDHJMPX-UHFFFAOYSA-N	CCCCOCC(O)COCCCC		CCCCOCC(O)COCCCC	2216-77-5	Dibuprol	204.31	110.479	-77.7627	Organic compounds	Lipids and lipid-like molecules	Glycerolipids	Diradylglycerols			2.11315	1.12839	2.69049	0.474952			1.81466	0.666281	2.69321	0.479214
ABSHBZODGOHLFR-UHFFFAOYSA-N	CCCC(Cl)(Cl)Cl		CCCC(Cl)(Cl)Cl	13279-85-1	1,1,1-Trichlorobutane	161.459	70.4855	-122.638	Organic compounds	Organohalogen compounds	Organochlorides				1.17915	-0.530461	2.27966	0.708116			1.0593	-0.474341	2.66037	0.672463
ABSPRNADVQNDOU-UHFFFAOYSA-N	CC1C(O)=C2C=CC=CC2=C(O)C=1C=CC(C)=C		CC1C(O)=C2C=CC=CC2=C(O)C=1C=CC(C)=C	957-78-8	Vitamin MK 1	240.302	16.2179	17.1574	Organic compounds	Lipids and lipid-like molecules	Prenol lipids	Quinone and hydroquinone lipids			1.67443	0.423152	2.39802	0.694113			0.959912	-0.188471	2.19537	0.709679
ABSTXSZPGHDTAF-BYPYZUCNSA-N	CC(N)CCC(O)=O		CC(N)CCC(O)=O	1558-59-4	(4S)-4-Aminopentanoic acid	117.148	46.4048	-59.8459	Organic compounds	Organic acids and derivatives	Carboxylic acids and derivatives	Amino acids, peptides, and analogues			1.84796	0.541938	2.5914	0.544937			2.08789	0.735751	3.04188	0.580582
ABSTXSZPGHDTAF-UHFFFAOYSA-N	CC(N)CCC(O)=O		CC(N)CCC(O)=O	627-61-2	(+/-)-4-Aminopentanoic acid	117.148	46.4044	-59.8459	Organic compounds	Organic acids and derivatives	Carboxylic acids and derivatives	Amino acids, peptides, and analogues			1.84796	0.541938	2.5914	0.544937			2.08789	0.735751	3.04188	0.580582
ABSWXCXMXIZDSN-UHFFFAOYSA-L	[Mg+2].CCCCCCCCCCCCCCCC([O-])=O.CCCCCCCCCCCCCCCC([O-])=O	[Mg+2]	CCCCCCCCCCCCCCCC(O)=O	16178-72-6	Magnesium dihexadecanoate	256.43	96.4765	-52.8997	Organic compounds	Lipids and lipid-like molecules	Fatty Acyls	Fatty acids and conjugates			2.29561	1.43084	2.81947	0			1.86253	0.929478	2.88372	0
ABTAMTTWNRHXGT-UHFFFAOYSA-M	CC1=CC(=CC=C1N=NC1=NC(=NS1)C1C=CC=CC=1)N(CC[N+](C)(C)C)CC.COS([O-])(=O)=O	COS(=O)(=O)[O-]	CC1=CC(=CC=C1N=NC1=NC(=NS1)C1C=CC=CC=1)N(CC[N+](C)(C)C)CC	28313-51-1	Ethanaminium, 2-[ethyl[3-methyl-4-[2-(3-phenyl-1,2,4-thiadiazol-5-yl)diazenyl]phenyl]amino]-N,N,N-trimethyl-, methyl sulfate (1:1)	409.583	-151.816	-60.6064	Organic compounds	Benzenoids	Benzene and substituted derivatives	Toluenes			0.998653	-0.605962	2.5729	0.738334			1.15387	-0.502176	3.42886	0.765004
ABTAPMOIPJSVIW-UHFFFAOYSA-L	[Na+].[Na+].COC1=CC(=CC=C1N)N=NC1C=C2C(=CC=CC2=C(C=1)S([O-])(=O)=O)S([O-])(=O)=O	[Na+]	COC1C=C(C=CC=1N)N=NC1C=C(C2C=CC=C(C=2C=1)S(O)(=O)=O)S(O)(=O)=O	67906-55-2	1,5-Naphthalenedisulfonic acid, 3-[2-(4-amino-3-methoxyphenyl)diazenyl]-, sodium salt (1:2)	437.455	-164.47	-21.206	Organic compounds	Benzenoids	Naphthalenes	Naphthalene sulfonic acids and derivatives			1.9753	0.807147	2.6623	0.635137			1.9093	0.388474	3.04038	0.653858
ABTHZNIDMGCYQA-UHFFFAOYSA-N	O=C(CCCN1CCN(CC1)C1C=CC(F)=CC=1)NC1C=CC(Cl)=CC=1		O=C(CCCN1CCN(CC1)C1C=CC(F)=CC=1)NC1C=CC(Cl)=CC=1	923024-39-9	N-(4-Chlorophenyl)-4-[4-(4-fluorophenyl)piperazin-1-yl]butanamide	375.875	1.86178	71.3902	Organic compounds	Organoheterocyclic compounds	Diazinanes	Piperazines			1.21642	-0.301381	2.28606	0.682209			0.775389	-0.578584	2.09991	0.693453
ABTLMGYPRQPZJF-UHFFFAOYSA-N	O=S(=O)(NC1=CC=CC=N1)C1C=CC(Cl)=CC=1		O=S(=O)(NC1=CC=CC=N1)C1C=CC(Cl)=CC=1	1213-38-3	4-chloro-N-(pyridin-2-yl)benzenesulfonamide	268.725	-107.922	-54.6805	Organic compounds	Benzenoids	Benzene and substituted derivatives	Benzenesulfonamides			1.23464	-0.485959	2.40768	0.611735			0.822696	-0.521935	2.20992	0.625913
ABTLZAVJDRUDNG-UHFFFAOYSA-N	[O-][N+](=O)c1c(O)[n]c[nH]c1=O		[O-][N+](=O)c1c(O)[n]c[nH]c1=O	2164-83-2	5-Nitropyrimidine-4,6-diol	157.085	-19.0345	34.8783	Organic compounds	Organic 1,3-dipolar compounds	Allyl-type 1,3-dipolar organic compounds	Organic nitro compounds			1.66607	0.0822591	2.45119	0.741186			1.02589	-0.893967	2.58771	0.735188
ABTNYEMMMLVTBW-UHFFFAOYSA-N	O=C(OC1C=CC(=CC=1)C1C=CC=CC=1)C1=CC=CO1		O=C(OC1C=CC(=CC=1)C1C=CC=CC=1)C1=CC=CO1	75742-01-7	biphenyl-4-yl 2-furoate	264.28	5.84939	-28.8179	Organic compounds	Benzenoids	Benzene and substituted derivatives	Biphenyls and derivatives			1.80105	0.466314	2.47942	0.660415			1.27541	-0.240023	2.42511	0.68623
ABTPGIOEJSPPAW-UHFFFAOYSA-L	[Na+].[Na+].[O-]C(=O)C1=CC(=CC=C1O)NC(=O)C1C=CC(=CC=1)NN=c1c(=O)c(ccc1=O)=NNC1=CC(=CC=C1O)N=NC1C=C(C=CC=1)S([O-])(=O)=O	[Na+]	OC(=O)C1C=C(C=CC=1O)NC(=O)C1C=CC(=CC=1)NN=c1c(=O)c(ccc1=O)=NNC1C=C(C=CC=1O)N=NC1C=C(C=CC=1)S(O)(=O)=O	69121-14-8	Benzoic acid, 5-[[4-[2-[2,6-dihydroxy-3-[2-[2-hydroxy-5-[2-(3-sulfophenyl)diazenyl]phenyl]diazenyl]phenyl]diazenyl]benzoyl]amino]-2-hydroxy-, sodium salt (1:2)	697.642	-161.245	-13.4986	Organic compounds	Benzenoids	Benzene and substituted derivatives	Anilides			2.17872	1.0995	2.87708	0.662178			2.18908	0.656364	3.033	0.71647
ABTRFGSPYXCGMR-HNNISBQLSA-N	CC(C)=CCCC(C)=CC=CC(C)=CC=CC(C)=CC=CC=C(C)C=CC=C(C)C=CC1=C(C)CC(O)CC1(C)C		CC(C)=CCCC(C)=CC=CC(C)=CC=CC(C)=CC=CC=C(C)C=CC=C(C)C=CC1=C(C)CC(O)CC1(C)C	79-75-4	Hydroxytorulene	552.887	76.2616	94.9941	Organic compounds	Lipids and lipid-like molecules	Prenol lipids	Tetraterpenoids			1.50001	-0.228054	2.64744	0.670996			1.45621	-0.00100058	2.66739	0.695581
ABTRFGSPYXCGMR-KXQOOQHDSA-N	CC(C)=CCCC(C)=CC=CC(C)=CC=CC(C)=CC=CC=C(C)C=CC=C(C)C=CC1=C(C)CC(O)CC1(C)C		CC(C)=CCCC(C)=CC=CC(C)=CC=CC(C)=CC=CC=C(C)C=CC=C(C)C=CC1=C(C)CC(O)CC1(C)C	3763-55-1	(3R)-beta-4-Caroten-3-ol	552.887	76.2616	94.9941	Organic compounds	Lipids and lipid-like molecules	Prenol lipids	Tetraterpenoids			1.50001	-0.228054	2.64744	0.670996			1.45621	-0.00100058	2.66739	0.695581
ABTSKZKCMFRYNP-HUFPKKMTSA-N	CC(=O)OC1CC(=O)OC(C)CC=CC=CC(O)C(C)CC(CC=O)C(OC2OC(C)C(OC3CC(C)(O)C(OC(=O)CC)C(C)O3)C(C2O)N(C)C)C1OC		CC(=O)OC1CC(=O)OC(C)CC=CC=CC(O)C(C)CC(CC=O)C(OC2OC(C)C(OC3CC(C)(O)C(OC(=O)CC)C(C)O3)C(C2O)N(C)C)C1OC	18361-48-3	Leucomycin A6	799.952	73.6016	126.634	Organic compounds	Organic oxygen compounds	Organooxygen compounds	Carbohydrates and carbohydrate conjugates			2.15861	-0.374822	3.10726	0.761199			1.66024	-0.816365	3.41831	0.754529
ABTUPEBOWRKQLD-FZMZJTMJSA-N	CC1CSC2C(N)C(=O)N2C=1C(=O)OCC1C=CC(=CC=1)[N+]([O-])=O		CC1CSC2C(N)C(=O)N2C=1C(=O)OCC1C=CC(=CC=1)[N+]([O-])=O	29124-83-2	p-Nitrobenzyl (6R-trans)-7-amino-3-methyl-8-oxo-5-thia-1-azabicyclo(4.2.0)oct-2-ene-2-carboxylate	349.368	55.3266	115.442	Organic compounds	Benzenoids	Benzene and substituted derivatives	Benzyloxycarbonyls			1.81291	-0.368289	2.62985	0.732663			1.01521	-0.80874	2.84435	0.679984
ABTXGJFUQRCPNH-UHFFFAOYSA-N	Cl.CCN(CCNC(=O)C1C=CC(N)=CC=1)CC	Cl	CCN(CCNC(=O)C1C=CC(N)=CC=1)CC	614-39-1	Procainamide hydrochloride	235.331	-66.9848	-64.1411	Organic compounds	Benzenoids	Benzene and substituted derivatives	Benzoic acids and derivatives			1.59189	0.426731	2.40946	0.660487			0.972551	-0.29707	2.32902	0.699765
ABTZKZVAJTXGNN-UHFFFAOYSA-N	CCCCCCC(=O)OCCCCCCCCCCCCCCCCCC		CCCCCCC(=O)OCCCCCCCCCCCCCCCCCC	66009-41-4	Octadecyl heptanoate	382.673	135.597	-3.52365	Organic compounds	Lipids and lipid-like molecules	Fatty Acyls	Fatty alcohol esters			2.45467	1.73154	2.96706	0			2.13694	1.28739	3.00351	0.0689441
ABUHSDOPNYVFIV-UHFFFAOYSA-N	CC1=CC(NC(=O)CN2N=NC(=N2)C2=CC=CC=C2N)=NO1		CC1=CC(NC(=O)CN2N=NC(=N2)C2=CC=CC=C2N)=NO1	436093-06-0	2-[5-(2-Aminophenyl)-2H-tetrazol-2-yl]-N-(5-methyl-1,2-oxazol-3-yl)acetamide	299.294	-53.3923	12.3267	Organic compounds	Organoheterocyclic compounds	Azoles	Tetrazoles			1.80603	0.376853	2.6134	0.754938			1.06809	-0.293735	2.51396	0.758525
ABUISBDTYAZRHY-ITNFBUOGSA-N	CC12C=CC(=O)C=C1C(F)CC1C3CCC(O)(C(=O)CO)C3(C)CC(O)C21F		CC12C=CC(=O)C=C1C(F)CC1C3CCC(O)(C(=O)CO)C3(C)CC(O)C21F	60864-55-3	6,9-Difluoro-11,17,21-trihydroxypregna-1,4-diene-3,20-dione	396.43	124.297	102.533	Organic compounds	Lipids and lipid-like molecules	Steroids and steroid derivatives	Hydroxysteroids			1.18396	-2.79765	2.55084	0.714322			0.782307	-2.05668	2.57705	0.761733
ABUISBDTYAZRHY-RBKZJGKHSA-N	CC12C=CC(=O)C=C1C(F)CC1C3CCC(O)(C(=O)CO)C3(C)CC(O)C21F		CC12C=CC(=O)C=C1C(F)CC1C3CCC(O)(C(=O)CO)C3(C)CC(O)C21F	806-29-1	(6Î±,11Î²)-6,9-Difluoro-11,17,21-trihydroxypregna-1,4-diene-3,20-dione	396.43	124.296	102.533	Organic compounds	Lipids and lipid-like molecules	Steroids and steroid derivatives	Hydroxysteroids			1.18396	-2.79765	2.55084	0.714322			0.782307	-2.05668	2.57705	0.761733
ABUPWXCYFWRZKL-UHFFFAOYSA-N	CSSCCCC		CSSCCCC	60779-24-0	Methyl n-butyl disulfide	136.285	121.25	-115.317	Organic compounds	Organosulfur compounds	Organic disulfides	Dialkyldisulfides			1.37348	-0.508591	2.46418	0.629372			0.729872	-1.5336	2.37164	0.630563
ABUZDQCQXDZFRG-UHFFFAOYSA-N	COC(=O)CCCCC(=O)OC=C		COC(=O)CCCCC(=O)OC=C	2969-87-1	Adipic acid, methyl vinyl ester	186.207	115.025	1.05396	Organic compounds	Lipids and lipid-like molecules	Fatty Acyls	Fatty acid esters			1.94246	0.79867	2.61273	0.3659			1.75314	0.503069	2.75103	0.47371
ABVBOWJCKJGCJM-DMTCNVIQSA-N	OC1CC(C(O)=O)N(C1)N=O		OC1CC(C(O)=O)N(C1)N=O	30310-80-6	Nitrosohydroxyproline	160.129	54.7492	44.1472	Organic compounds	Organic acids and derivatives	Carboxylic acids and derivatives	Amino acids, peptides, and analogues			1.90741	0.590604	2.52899	0.768129			1.24818	-1.62933	2.83663	0.7673
ABVFVJRTKMVJMV-XDHOZWIPSA-N	ClC1=CC(Cl)=CC=C1C(=CN1C=NC=C1)OCCOC1C=CC(Cl)=CC=1		ClC1=CC(Cl)=CC=C1C(=CN1C=NC=C1)OCCOC1C=CC(Cl)=CC=1	70161-09-0	(E)-1-(2,4-Dichloro-beta-(2-(p-chlorophenoxy)ethoxy)styryl)imidazole	409.7	-66.4586	-103.038	Organic compounds	Benzenoids	Benzene and substituted derivatives	Halobenzenes			0.958358	-0.646189	2.56801	0.687052			0.852738	-0.786079	2.26737	0.676632
ABVGDXLCJRFCOD-UHFFFAOYSA-N	O=C1C2NC=NC=2C(=O)C2=CC=CC=C12		O=C1C2NC=NC=2C(=O)C2=CC=CC=C12	4496-30-4	1h-naphtho[2,3-d]imidazole-4,9-dione	198.181	-49.5423	63.5103	Organic compounds	Benzenoids	Naphthalenes				1.79271	0.36337	2.46384	0.671003			1.03179	-0.395934	2.3383	0.680303
ABVRVIZBZKUTMK-JSYANWSFSA-M	[K+].[O-]C(=O)C1C(=CCO)OC2CC(=O)N12	[K+]	OC(=O)C1C(=CCO)OC2CC(=O)N21	61177-45-5	Clavulanate potassium	199.162	77.4413	23.4685	Organic compounds	Organic acids and derivatives	Carboxylic acids and derivatives	Amino acids, peptides, and analogues			1.82824	0.0989114	2.56998	0.770932	1.45061		1.51758	-0.422355	2.80145	0.612646
ABVVEAHYODGCLZ-UHFFFAOYSA-N	CCCCCCCCCCCCCN		CCCCCCCCCCCCCN	2869-34-3	Tridecylamine	199.382	98.0102	-114.738	Organic compounds	Organic nitrogen compounds	Organonitrogen compounds	Amines			1.00955	-0.0456683	2.55134	0.140081			1.85685	0.0508513	2.68388	0.307692
ABVXLHURFQNCLR-UHFFFAOYSA-N	COCCCN1C(=O)C2=CC=CC3=C(O)C(=CC(=C32)C1=O)N=NC1C=CC(Cl)=CC=1		COCCCN1C(=O)C2=CC=CC3=C(O)C(=CC(=C32)C1=O)N=NC1C=CC(Cl)=CC=1	42358-39-4	1H-Benz[de]isoquinoline-1,3(2H)-dione, 5-[(4-chlorophenyl)azo]-6-hydroxy-2-(3-methoxypropyl)-	423.856	-160.757	14.1442	Organic compounds	Organoheterocyclic compounds	Isoquinolines and derivatives	Isoquinolones and derivatives			1.92761	-0.341376	2.6999	0.695802			1.89667	-0.184486	2.71271	0.737319
ABWFGJWIRFPJSB-UHFFFAOYSA-N	CCOC(=O)CC1=CN(C(=O)OC(C)(C)C)C2=CC=CC=C21		CCOC(=O)CC1=CN(C(=O)OC(C)(C)C)C2=CC=CC=C21	786647-50-5	tert-Butyl 3-(2-ethoxy-2-oxoethyl)-1H-indole-1-carboxylate	303.358	-36.4783	25.5991	Organic compounds	Organoheterocyclic compounds	Indoles and derivatives	Indolyl carboxylic acids and derivatives			1.64854	0.373831	2.43882	0.669461			0.918008	-0.832649	2.36307	0.69681
ABWHOEHSTSEVRD-UHFFFAOYSA-K	[Dy+3].CNC(=O)CN(CC([O-])=O)CCN(CC([O-])=O)CCN(CC([O-])=O)CC(=O)NC	[Dy+3]	CNC(=O)CN(CC(O)=O)CCN(CC(O)=O)CCN(CC(O)=O)CC(=O)NC	128470-17-7	Sprodiamide	419.435	61.473	-158.263	Organic compounds	Organic acids and derivatives	Carboxylic acids and derivatives	Amino acids, peptides, and analogues			2.10365	0.866577	2.76842	0.448752			1.36809	-0.078855	2.81095	0.491113
ABWKJXUCCMIVTI-UHFFFAOYSA-N	CC1=NC(=NN1C1C=C(Cl)C=CC=1)OC(C)C(=O)OCC		CC1=NC(=NN1C1C=C(Cl)C=CC=1)OC(C)C(=O)OCC	110607-69-7	Ethyl 2-{[1-(3-chlorophenyl)-5-methyl-1H-1,2,4-triazol-3-yl]oxy}propanoate	309.753	-58.3499	-116.411	Organic compounds	Organoheterocyclic compounds	Azoles	Triazoles			1.02639	-0.378885	2.32618	0.630451			0.754986	-0.53439	2.19464	0.633502
ABWLRVJYVVQTGQ-BJMVGYQFSA-N	NC(=S)NN=CC1C=NC=CC=1		NC(=S)N=NCC1C=NC=CC=1	555-90-8	Nicothiazone	180.236	-69.4663	-60.9841	Organic compounds	Organoheterocyclic compounds	Pyridines and derivatives				0.73795	-0.664557	2.63974	0.762612			0.854979	-0.535684	3.07709	0.738394
ABWOJTVKEBKALJ-UHFFFAOYSA-M	[K+].[O-]S(=O)(=O)OCCO	[K+]	OCCOS(O)(=O)=O	59599-54-1	Potassium glycol sulfate	142.132	31.0584	-90.3049	Organic compounds	Organic acids and derivatives	Organic sulfuric acids and derivatives	Sulfuric acid esters			1.78589	0.614784	2.56351	0.581557			1.4475	-0.369161	2.52325	0.52
ABWOTFZUTTYNAA-VBCPKWTRSA-N	CC1CC2C3CC=C4CC(=O)C=CC4(C)C3(Br)C(O)CC2(C)C1(Br)C(=O)CO		CC1CC2C3CC=C4CC(=O)C=CC4(C)C3(Br)C(O)CC2(C)C1(Br)C(=O)CO	61339-42-2	9,17-Dibromo-11,21-dihydroxy-16-methylpregna-1,4-diene-3,20-dione	516.27	128.926	106.846	Organic compounds	Lipids and lipid-like molecules	Steroids and steroid derivatives	Hydroxysteroids			1.55239	-0.8137	2.91094	0.755201			0.430893	-3.1325	2.59283	0.784339
ABWPKESIPFFOLV-UHFFFAOYSA-N	C1=C(N=CC=C1C1C=CC=CC=1)C1=NC(=C(N=N1)C1C=CC=CC=1)C1C=CC=CC=1		C1=C(N=CC=C1C1C=CC=CC=1)C1=NC(=C(N=N1)C1C=CC=CC=1)C1C=CC=CC=1	1058-71-5	1,2,4-Triazine, 5,6-diphenyl-3-(4-phenyl-2-pyridinyl)-	386.458	-67.2046	23.2858	Organic compounds	Organoheterocyclic compounds	Pyridines and derivatives	Phenylpyridines			1.6522	-0.334746	2.49899	0.728056			1.2863	-0.494628	2.57865	0.735231
ABWVCNMFYVEBIB-CDNBRZBRSA-L	[Na+].[Na+].Nc1cc[n](C2CC(O)C(COP(O)(=O)OP(O)(=O)OP([O-])([O-])=O)O2)c(=O)[n]1	[Na+]	Nc1cc[n](C2CC(O)C(COP(O)(=O)OP(O)(=O)OP(O)(O)=O)O2)c(=O)[n]1	102783-51-7	["Cytidine, 2'-deoxy-, 5'-(tetrahydrogen triphosphate), sodium salt (1:2)"]	467.157	42.6524	129.626	Organic compounds	Nucleosides, nucleotides, and analogues	Pyrimidine nucleotides	Pyrimidine deoxyribonucleotides			1.66894	-1.01565	2.63593	0.795217			0.953878	-1.55898	2.56301	0.79412
ABXFOTMKHPEYQJ-UHFFFAOYSA-N	[NH4+].[NH4+].[O-]P([O-])(=O)OCC(O)CC(F)(F)C(F)(F)C(F)(F)C(F)(F)C(F)(F)C(F)(F)C(F)(F)C(F)(F)C(F)(F)C(F)(F)C(F)(F)C(F)(F)C(F)(F)C(F)(F)F	[NH4+]	OP(O)(=O)OCC(O)CC(F)(F)C(F)(F)C(F)(F)C(F)(F)C(F)(F)C(F)(F)C(F)(F)C(F)(F)C(F)(F)C(F)(F)C(F)(F)C(F)(F)C(F)(F)C(F)(F)F	94200-48-3	Diammonium 3-(perfluorotetradecyl)-2-hydroxypropyl dihydrogen phosphate	874.162	10.8055	-166.65	Organic compounds	Organic acids and derivatives	Organic phosphoric acids and derivatives	Phosphate esters			0.639438	-0.689566	2.60396	0.680332			0.844483	-1.23892	2.71964	0.683019
ABXGMGUHGLQMAW-UHFFFAOYSA-N	CC(=O)C1C=C(C=CC=1)C(F)(F)F		CC(=O)C1C=C(C=CC=1)C(F)(F)F	349-76-8	Ethanone, 1-[3-(trifluoromethyl)phenyl]-	188.148	-71.0471	-46.1689	Organic compounds	Organic oxygen compounds	Organooxygen compounds	Carbonyl compounds			1.22363	-0.092429	2.2952	0.557785			0.786318	-0.611669	2.29659	0.562154
ABXHHEZNIJUQFM-UHFFFAOYSA-N	CC(C)NCC(O)COC1=CC=CC=C1C1CCCCC1		CC(C)NCC(O)COC1=CC=CC=C1C1CCCCC1	55837-19-9	1-Isopropylamino-3-(2-cyclohexylphenoxy)-2-propanol	291.435	-3.22319	-107.654	Organic compounds	Benzenoids	Phenol ethers				1.45124	-0.03103	2.42655	0.697129			0.906759	-0.30619	2.23674	0.714171
ABXLPLLAOXKDDO-UHFFFAOYSA-N	CC(CC(C1=CC(C)=CC=C1C)C1C=CC=CC=1)C1C=CC=CC=1		CC(CC(C1=CC(C)=CC=C1C)C1C=CC=CC=1)C1C=CC=CC=1	84255-44-7	["1,1'-[1-(2,5-Dimethylphenyl)butane-1,3-diyl]dibenzene"]	314.472	-19.1469	-59.0771	Organic compounds	Phenylpropanoids and polyketides	Linear 1,3-diarylpropanoids				1.38719	-0.478857	2.39998	0.677102			0.856767	-0.186025	2.17454	0.678856
ABXLQQAKBRIHIT-UHFFFAOYSA-N	CCCCC(COC(=O)CCCC(=O)OCC(CCCC)CC)CC		CCCCC(COC(=O)CCCC(=O)OCC(CCCC)CC)CC	21302-20-5	Pentanedioic acid, 1,5-bis(2-ethylhexyl) ester	356.547	131.437	-42.4845	Organic compounds	Lipids and lipid-like molecules	Fatty Acyls	Fatty acid esters			2.12215	1.14757	2.64637	0.10376			1.85729	0.995655	2.61974	0.126082
ABXNBKQSDWIZQP-UHFFFAOYSA-N	CCCCCCCCCCCCCCCCCCOC(=O)CCCCC(O)=O		CCCCCCCCCCCCCCCCCCOC(=O)CCCCC(O)=O	90604-96-9	Hexanedioic acid, octadecyl ester	398.628	133.274	-1.62025	Organic compounds	Lipids and lipid-like molecules	Fatty Acyls	Fatty acids and conjugates			2.3196	1.48083	2.91676	0.153846			2.25134	1.06365	3.30118	0.20666
ABXXXZLVKKIAGK-UHFFFAOYSA-N	CC(C)CCCCCOC(=O)CCCCCCCC1OC1CCCCCCCC		CC(C)CCCCCOC(=O)CCCCCCCC1OC1CCCCCCCC	11087-88-0	6-Methylheptyl 8-(3-octyloxiran-2-yl)octanoate	410.683	131.227	-19.7328	Organic compounds	Lipids and lipid-like molecules	Fatty Acyls	Lineolic acids and derivatives			2.2106	1.00382	2.8782	0.281081			1.63357	0.325253	2.72336	0.356757
ABXYOVCSAGTJAC-JGWLITMVSA-N	OCC(O)C(=O)C(O)C(O)CS		OCC(O)C(=O)C(O)C(O)CS	7534-35-2	1-Thiohexose	196.224	51.303	-101.05	Organic compounds	Organic oxygen compounds	Organooxygen compounds	Carbohydrates and carbohydrate conjugates			1.26619	-0.508912	2.34748	0.698602			0.991751	-0.591817	2.82361	0.727724
ABXZGZXVLBYJDK-UHFFFAOYSA-N	CC1C=CC(=CC=1)S(=O)(=O)N1CC2=CC=CC=C2CC1		CC1C=CC(=CC=1)S(=O)(=O)N1CC2=CC=CC=C2CC1	20335-69-7	Isoquinoline, 1,2,3,4-tetrahydro-2-(p-tolylsulfonyl)-	287.384	-12.5553	51.977	Organic compounds	Benzenoids	Benzene and substituted derivatives	Toluenes			1.44552	-0.206433	2.38927	0.651682			0.809274	-0.623407	2.22825	0.677281
ABXZHBOLRVUXPK-UHFFFAOYSA-N	NCCCSC(N)=N		NCCCSC(N)=N	7320-57-2	3-Aminopropylisothiuronium	133.22	119.028	-120.753	Organic compounds	Organosulfur compounds	Isothioureas				0.645822	-0.804265	3.7221	0.710594			0.644787	-0.768799	2.09082	0.712768
ABXZOXDTHTTZJW-UHFFFAOYSA-N	OC1=CC(CC2NCCC3=CC(O)=C(O)C=C32)=CC=C1O		OC1=CC(CC2NCCC3=CC(O)=C(O)C=C32)=CC=C1O	4747-99-3	Tetrahydropapaveroline	287.315	-23.2215	135.691	Organic compounds	Organoheterocyclic compounds	Isoquinolines and derivatives	Benzylisoquinolines			1.8418	0.158236	2.53729	0.77322			1.14048	-0.229585	2.49133	0.758346
ABYBSKYSXDSVJG-UHFFFAOYSA-N	N#CCCNCCCCCCNCCC#N		N#CCCNCCCCCCNCCC#N	2004-62-8	["3,3'-(Hexane-1,6-diyldiazanediyl)dipropanenitrile"]	222.336	101.339	-107.301	Organic compounds	Organic nitrogen compounds	Organonitrogen compounds	Cyanides			1.37901	-0.142966	2.37418	0.651978			0.864995	-0.500271	2.15986	0.72013
ABYDHFCNXZFOEE-MHWRWJLKSA-N	O=C(NN=CC1C=CC(Cl)=CC=1)NC1C=CC=CC=1		O=C(NC1C=CC=CC=1)N=NCC1C=CC(Cl)=CC=1	93535-29-6	4-chlorobenzaldehyde N-phenylsemicarbazone	273.723	-72.138	-62.733	Organic compounds	Benzenoids	Benzene and substituted derivatives	N-phenylureas			1.22804	-0.335153	2.43316	0.647389			1.03847	-0.326569	3.25758	0.642627
ABYGSZMCWVXFCQ-UHFFFAOYSA-N	CCCC(CCC)CCC		CCCC(CCC)CCC	3178-29-8	4-Propylheptane	142.286	126.239	-97.297	Organic compounds	Hydrocarbons	Saturated hydrocarbons	Alkanes			2.10814	1.11937	2.62552	0.587632			1.43568	0.138771	2.35792	0.584854
ABYVDBPOASKQRT-UHFFFAOYSA-N	[I-].I.N=C([O-])C1C=C[N+](COCN2C=CC(C=C2C=NO)=C=[NH+]O)=CC=1	[I-].I	N=C(O)C1C=C[N+](COCN2C=CC(C=C2C=NO)=C=NO)=CC=1	120103-35-7	1-[({2-[(Hydroxyamino)methylidene]-4-[(oxoiminio)methyl]pyridin-1(2H)-yl}methoxy)methyl]pyridin-1-ium-4-carboximidate iodide--hydrogen iodide (1/1/1)	330.324	-95.2455	-95.0177	Organic compounds	Organoheterocyclic compounds	Pyridines and derivatives	Pyridinecarboxylic acids and derivatives			1.71792	-0.180077	2.62221	0.839322			1.43784	-0.4863	2.96676	0.839246
ABYZYVAIOYICJQ-UHFFFAOYSA-N	ClC1C=CC=C(OC2C=C(Cl)C(Cl)=CC=2Cl)C=1Cl		ClC1C=CC=C(OC2C=C(Cl)C(Cl)=CC=2Cl)C=1Cl	160282-08-6	["2,2',3',4,5-Pentachlorodiphenylether"]	342.436	-101.164	-2.67487	Organic compounds	Benzenoids	Benzene and substituted derivatives	Diphenylethers			0.610376	-1.15747	2.22641	0.692716			-1.1327	-5.35751	1.09927	0.637348
ABZLZZCDSLOCNF-UHFFFAOYSA-N	COC(=O)C1C(O)=C(C)C(=CC=1C)OC(=O)C1C(O)=C(C=O)C(O)=C(Cl)C=1C		COC(=O)C1C(O)=C(C)C(=CC=1C)OC(=O)C1C(O)=C(C=O)C(O)=C(Cl)C=1C	479-16-3	Benzoic acid, 3-chloro-5-formyl-4,6-dihydroxy-2-methyl-, 3-hydroxy-4-(methoxycarbonyl)-2,5-dimethylphenyl ester	408.79	-39.9467	6.55224	Organic compounds	Phenylpropanoids and polyketides	Depsides and depsidones				1.98168	0.194889	2.69938	0.686433			1.33655	-0.703522	3.04449	0.719836
ABZQOGOYSWCIOO-UHFFFAOYSA-N	COC(C)(C)CCCC(C)C		COC(C)(C)CCCC(C)C	64390-81-4	Heptane, 2-methoxy-2,6-dimethyl-	158.285	116.247	-52.4601	Organic compounds	Organic oxygen compounds	Organooxygen compounds	Ethers			1.87641	0.801361	2.51704	0.558628			1.4821	0.209123	2.34859	0.580352
ABZZOPIABWYXSN-UHFFFAOYSA-N	OC1CC=CCC1		OC1CC=CCC1	822-66-2	3-Cyclohexen-1-ol	98.145	101.837	52.3773	Organic compounds	Organic oxygen compounds	Organooxygen compounds	Alcohols and polyols			1.80111	0.837481	2.40352	0.639394			1.42681	0.260055	2.49474	0.639394
ACADKHGAMCGGHY-UHFFFAOYSA-N	COC(=O)C(CC)(C#N)C(C)CC		COC(=O)C(CC)(C#N)C(C)CC	71735-23-4	Methyl 2-cyano-2-ethyl-3-methylpentanoate	183.251	89.7997	-20.2045	Organic compounds	Lipids and lipid-like molecules	Fatty Acyls	Fatty acid esters			1.67984	0.0106862	2.43479	0.718997			0.995604	-0.487782	2.2355	0.73818
ACAHRYLWSNWTFN-UHFFFAOYSA-N	OC(=O)C(F)(C(F)(C(F)(F)C(F)(F)F)C(F)(F)C(F)(F)F)C(F)(F)F		OC(=O)C(F)(C(F)(C(F)(F)C(F)(F)F)C(F)(F)C(F)(F)F)C(F)(F)F	1882109-66-1	Perfluoro-3-ethyl-2-methylpentanoic acid	414.064	8.9696	-136.888	Organic compounds	Lipids and lipid-like molecules	Fatty Acyls	Fatty acids and conjugates			0.32617	-1.00683	2.34191	0.526496			0.578242	-1.43601	1.61671	0.516496
ACALHKQKISMQQT-UHFFFAOYSA-N	CCCCCCCCCCC(C)NC(=O)C=C		CCCCCCCCCCC(C)NC(=O)C=C	13288-50-1	2-Propenamide, N-(1-methylundecyl)-	239.403	101.659	-6.2418	Organic compounds	Organic acids and derivatives	Carboxylic acids and derivatives	Acrylic acids and derivatives			1.95942	0.399451	2.63485	0.57715			1.52416	0.0537254	2.5027	0.604926
ACAOMVAOUMITTJ-UBEDBUPSSA-N	NC1=NC(=NC2=C1N=CN2C1OC(CO)C(O)C1O)C1C=C(C=CC=1)[N+]([O-])=O		NC1=NC(=NC2=C1N=CN2C1OC(CO)C(O)C1O)C1C=C(C=CC=1)[N+]([O-])=O	109875-47-0	2-(m-Nitrophenyl)adenosine	388.34	31.819	133.775	Organic compounds	Nucleosides, nucleotides, and analogues	Purine nucleosides				2.05236	0.299153	2.89016	0.73811			1.58515	-0.330598	2.97207	0.743357
ACAUYCZBWABOLI-UHFFFAOYSA-N	C[Si](C)(C)CBr		C[Si](C)(C)CBr	18243-41-9	Silane, (bromomethyl)trimethyl-	167.122	83.3021	-95.6634	Organic compounds	Organic salts	Organic metal salts	Organic metalloid salts			1.23608	-0.716187	2.30866	0.756751			0.801259	-0.719695	2.56973	0.737726
ACAYMVIABBCVER-UHFFFAOYSA-L	[Na+].[Na+].CCCCCCCCC(C(O)CCCCCCCCOCCOCCOS([O-])(=O)=O)S([O-])(=O)=O	[Na+]	CCCCCCCCC(C(O)CCCCCCCCOCCOCCOS(O)(=O)=O)S(O)(=O)=O	85153-73-7	Disodium 10-hydroxy-18-{2-[2-(sulfonatooxy)ethoxy]ethoxy}octadecane-9-sulfonate	534.734	27.806	-88.408	Organic compounds	Organic acids and derivatives	Organic sulfuric acids and derivatives	Sulfuric acid esters			2.23105	0.909415	2.90654	0.489895			1.86794	0.207319	3.07483	0.428679
ACAZKHULUUVWCY-JFGNBEQYSA-N	CCCCCC(=O)NC1C2SC(C)(C)C(C(O)=O)N2C1=O		CCCCCC(=O)NC1C2SC(C)(C)C(C(O)=O)N2C1=O	4493-18-9	Penicillin DF	314.407	19.5456	150.691	Organic compounds	Organic acids and derivatives	Carboxylic acids and derivatives	Amino acids, peptides, and analogues			1.2166	-1.03021	2.38242	0.69745			1.43043	-1.555	2.46959	0.596829
ACBFEXJHCINJDS-UHFFFAOYSA-N	COC(=O)CC1C=C(Cl)C(O)=CC=1		COC(=O)CC1C=C(Cl)C(O)=CC=1	57017-95-5	Methyl 3-chloro-4-hydroxyphenylacetate	200.621	-13.263	-36.3016	Organic compounds	Benzenoids	Phenols	Halophenols			1.22888	0.237987	2.29704	0.618036			0.916185	-0.440594	2.09938	0.661009
ACBFJDARQXVXLX-UHFFFAOYSA-M	[Cl-].CCN(CC[N+](C)(C)CC(C)O)C1C=CC(=CC=1)N=NC1=CC=C(C=C1Cl)[N+]([O-])=O	[Cl-]	CCN(CC[N+](C)(C)CC(C)O)C1C=CC(=CC=1)N=NC1C=CC(=CC=1Cl)[N+]([O-])=O	54229-13-9	1-Propanaminium, N-[2-[[4-[2-(2-chloro-4-nitrophenyl)diazenyl]phenyl]ethylamino]ethyl]-2-hydroxy-N,N-dimethyl-, chloride (1:1)	434.948	-153.276	-55.7568	Organic compounds	Organoheterocyclic compounds	Azobenzenes			1.80924	1.40235	-0.308797	2.69517	0.659475			1.47765	-0.238407	3.03801	0.725206
ACBFJMAXNZVRRX-UHFFFAOYSA-N	CCCCCCCCCOC(=O)C1=CC=CC=C1C(=O)OCCCCCCCCCCC		CCCCCCCCCOC(=O)C1=CC=CC=C1C(=O)OCCCCCCCCCCC	65185-89-9	n-Nonyl n-undecyl phthalate	446.672	4.90999	-71.3494	Organic compounds	Benzenoids	Benzene and substituted derivatives	Benzoic acids and derivatives			1.91777	1.08056	2.5628	0.00740741			1.45089	0.613602	2.4755	0.102006
ACBFXJILDVSGGU-UHFFFAOYSA-N	CCCCOCCOCC1CO1		CCCCOCCOCC1CO1	13483-47-1	2-[(2-Butoxyethoxy)methyl]oxirane	174.24	142.017	37.4773	Organic compounds	Organoheterocyclic compounds	Epoxides				2.06869	1.10534	2.64642	0.471759			1.53407	0.28478	2.5544	0.56956
ACBJGAPIXKDCRP-UHFFFAOYSA-L	[Na+].[Na+].NC1=CC=C2C(=CC=CC2=C1S([O-])(=O)=O)S([O-])(=O)=O	[Na+]	NC1C=CC2C(=CC=CC=2C=1S(O)(=O)=O)S(O)(=O)=O	62203-79-6	Disodium 2-naphthylamine-1,5-disulfonate	303.317	-141.729	-20.8365	Organic compounds	Benzenoids	Naphthalenes	Naphthalene sulfonic acids and derivatives			2.03817	0.833953	2.56589	0.591823			1.5147	-0.177947	2.72913	0.688104
ACBLZFZDCOGNHD-UHFFFAOYSA-N	CCCC(CCC)(CCC)C(N)=O		CCCC(CCC)(CCC)C(N)=O	52061-73-1	Valdipromide	185.311	67.1889	-106.355	Organic compounds	Lipids and lipid-like molecules	Fatty Acyls	Fatty amides			1.58651	0.232677	2.41073	0.686038			1.00564	-0.335516	2.15928	0.668139
ACBMYYVZWKYLIP-UHFFFAOYSA-N	CCCCCC(C)(C)O		CCCCCC(C)(C)O	625-25-2	2-Methylheptan-2-ol	130.231	80.5998	-121.923	Organic compounds	Organic oxygen compounds	Organooxygen compounds	Alcohols and polyols			1.91274	1.03435	2.47254	0.570183			1.54833	0.636129	2.35912	0.569035
ACBNDNDUHMROEN-UHFFFAOYSA-N	[H-].[H-].[Fe+2].[C-]#[O+].[C-]#[O+].[C-]#[O+].[C-]#[O+]	[H-].[Fe+2]	[C-]#[O+]	12002-28-7	Iron(2+) hydride - carbon monooxide (1:2:4)	28.01	34.6118	7.15104	Inorganic compounds	Mixed metal/non-metal compounds	Miscellaneous mixed metal/non-metals				1.18153	-0.165744	2.21073	0.927017			0.504172	-2.3239	2.1255	0.927017
ACBOJOPFHNLMLX-UHFFFAOYSA-N	CC(C)=CCCC(C)=CCCC(C)C(=O)CP(O)(O)=O		CC(C)=CCCC(C)=CCCC(C)C(=O)CP(O)(O)=O	140633-12-1	(2-Hydroxy-3,7,11-trimethyldodeca-2,6,10-trien-1-yl)phosphonic acid	302.351	124.344	14.3954	Organic compounds	Lipids and lipid-like molecules	Prenol lipids	Sesquiterpenoids			1.73687	-0.103276	2.53277	0.597287			1.2803	-0.279546	2.3314	0.597963
ACBQROXDOHKANW-UHFFFAOYSA-N	[O-][N+](=O)C1C=CC(=CC=1)OC(=O)OC1C=CC(=CC=1)[N+]([O-])=O		[O-][N+](=O)C1C=CC(=CC=1)OC(=O)OC1C=CC(=CC=1)[N+]([O-])=O	5070-13-3	Bis(4-nitrophenyl)carbonate	304.214	-126.566	-11.3744	Organic compounds	Benzenoids	Benzene and substituted derivatives	Nitrobenzenes			1.77715	0.241854	2.64811	0.525132			1.09659	-0.634949	2.52101	0.493877
ACBSZTQIFTYFGH-IAPPQJPRSA-N	CC(C)C(N)C(=O)OCCC(C[n]1c[n]c2c1[n]c(N)[nH]c2=O)COC(=O)CCCCCCCCCCCCCCCCC		CC(C)C(N)C(=O)OCCC(C[n]1c[n]c2c1[n]c(N)[nH]c2=O)COC(=O)CCCCCCCCCCCCCCCCC	195156-77-5	Valomaciclovir stearate	618.864	26.9735	117.612	Organic compounds	Organic acids and derivatives	Carboxylic acids and derivatives	Amino acids, peptides, and analogues			2.24293	0.424092	2.86102	0.647017			1.61464	0.0145764	2.97582	0.656684
ACBYRQONKZKIIY-GFCCVEGCSA-N	CC(C[n]1cc[nH]c1=O)C1C=C(OCC2CC2)C(=CC=1)OC		CC(C[n]1cc[nH]c1=O)C1C=C(OCC2CC2)C(=CC=1)OC	183659-72-5	Catramilast	302.374	-20.2982	111.156	Organic compounds	Benzenoids	Phenol ethers	Anisoles			1.62137	0.105617	2.42342	0.777134			0.917989	-0.652895	2.17599	0.775734
ACCAIGJKLCJFHP-UQKRIMTDSA-N	CCCCCCCCCCCC(=O)NC(CCC(O)=O)C(O)=O.OCCN(CCO)CCO	OCCN(CCO)CCO	CCCCCCCCCCCC(=O)NC(CCC(O)=O)C(O)=O	53576-49-1	["L-Glutamic acid, N-(1-oxododecyl)-, compd. with 2,2',2''-nitrilotris[ethanol] (1:1)"]	329.437	42.026	-43.4568	Organic compounds	Organic acids and derivatives	Carboxylic acids and derivatives	Amino acids, peptides, and analogues			2.13306	1.17917	2.73391	0.478525			2.16725	0.467163	3.35084	0.478525
ACCCAQVFLWDUTB-UHFFFAOYSA-N	CC1CCOC(COC2C=CC=CC=2)O1		CC1CCOC(COC2C=CC=CC=2)O1	94202-13-8	4-Methyl-2-(phenoxymethyl)-1,3-dioxane	208.257	22.3456	13.2292	Organic compounds	Benzenoids	Phenol ethers				1.64739	0.366839	2.38932	0.644095			1.43424	-0.326276	2.55286	0.662837
ACCCMOQWYVYDOT-UHFFFAOYSA-N	CCCCCC(O)O		CCCCCC(O)O	26762-52-7	Hexanediol	118.176	131.389	-98.8225	Organic compounds	Lipids and lipid-like molecules	Fatty Acyls	Fatty alcohols			2.04721	1.00911	2.92971	0.486561			1.85951	0.510504	2.738	0.501924
ACCCXSZCOGNLFL-UHFFFAOYSA-N	O=c1[nH]c2[n]c([nH]c2c(=O)[nH]1)C1C=CC=CC=1		O=c1[nH]c2[n]c([nH]c2c(=O)[nH]1)C1C=CC=CC=1	2879-14-3	8-Phenylxanthine	228.211	-61.0472	40.1603	Organic compounds	Organoheterocyclic compounds	Imidazopyrimidines	Purines and purine derivatives			1.75891	0.394694	2.663	0.713635			1.11435	-0.303861	2.51152	0.741302
ACCFQBRIRFGFKE-UHFFFAOYSA-M	[I-].CCN1C2=CC=CC=C2[O+]=C1C=C1SC2=CC=CC=C2N1CC	[I-]	CCN1C(=Cc2oc3ccccc3[n]2CC)SC2C=CC=CC1=2	68006-75-7	3-Ethyl-2-[(3-ethyl-1,3-benzothiazol-2(3H)-ylidene)methyl]-3H-1,3-benzoxazol-1-ium iodide	323.441	-154.08	6.1902	Organic compounds	Organoheterocyclic compounds	Benzoxazolines				0.899171	-1.15706	2.22821	0.85371			0.623495	-3.0126	2.21135	0.858931
ACCHWUWBKYGKNM-UHFFFAOYSA-N	OC1=CC(Cl)=C(Cl)C=C1O		OC1=CC(Cl)=C(Cl)C=C1O	3428-24-8	4,5-Dichlorocatechol	179.002	-89.7406	-4.10226	Organic compounds	Benzenoids	Phenols	Benzenediols			1.10162	-0.366347	2.24066	0.53807			1.2383	-0.301215	2.21553	0.4626
ACCLIXSHFMDCLV-UHFFFAOYSA-N	N#CCCN(CCC1C=CC=CC=1)C1C=CC=CC=1		N#CCCN(CCC1C=CC=CC=1)C1C=CC=CC=1	17601-74-0	3-(Phenyl(2-phenylethyl)amino)propiononitrile	250.345	-119.253	-76.356	Organic compounds	Benzenoids	Benzene and substituted derivatives	Phenethylamines			1.24036	-0.133211	2.25145	0.673781			0.71743	-0.385441	1.94594	0.69743
ACCMWZWAEFYUGZ-UHFFFAOYSA-N	CCOCCN1C(=NC2=CC=CC=C12)C1CCN(CCC2C=CC(=CC=2)C(C)(C)C(O)=O)CC1		CCOCCN1C(=NC2=CC=CC=C12)C1CCN(CCC2C=CC(=CC=2)C(C)(C)C(O)=O)CC1	202189-78-4	Bilastine	463.622	15.2436	72.1151	Organic compounds	Organoheterocyclic compounds	Benzimidazoles				1.80264	0.00840481	2.5602	0.741979			1.02441	-0.0702866	2.3905	0.73335
ACCRBMDJCPPJDX-UHFFFAOYSA-N	CCCC(O)CC(=O)OC		CCCC(O)CC(=O)OC	21188-58-9	Hexanoic acid, 3-hydroxy-, methyl ester	146.186	98.034	-24.1378	Organic compounds	Organic acids and derivatives	Hydroxy acids and derivatives	Beta hydroxy acids and derivatives			2.11436	1.24746	2.67743	0.576938			2.03796	0.99732	2.89431	0.592626
ACDDAJZIJAAEON-UHFFFAOYSA-N	OC(=O)C1C=C(C=CC=1)N1C(O)=C2CC=CCC2=C1O		OC(=O)C1C=C(C=CC=1)N1C(O)=C2CC=CCC2=C1O	89446-98-0	3-(1,3-dioxo-1,3,3a,4,7,7a-hexahydro-2H-isoindol-2-yl)benzoic acid	271.272	-39.4563	40.3431	Organic compounds	Benzenoids	Benzene and substituted derivatives	Benzoic acids and derivatives			1.88782	0.353483	2.58235	0.631044			1.38312	-0.212274	2.61021	0.659922
ACDLFRQZDTZESK-UHFFFAOYSA-N	OC(=O)C(NC(=O)C1C=CC=CC=1)C1C=CC=CC=1		OC(=O)C(NC(=O)C1C=CC=CC=1)C1C=CC=CC=1	74536-43-9	(benzoylamino)(phenyl)acetic acid	255.273	-28.5939	-45.4635	Organic compounds	Benzenoids	Benzene and substituted derivatives	Benzoic acids and derivatives			1.88518	0.550166	2.60433	0.62288			1.71223	0.110806	2.9022	0.623556
ACDLOOGOFKSUPO-UHFFFAOYSA-N	CC1=CC=C(Br)S1		CC1=CC=C(Br)S1	765-58-2	2-Bromo-5-methylthiophene	177.066	-42.1798	-20.6734	Organic compounds	Organoheterocyclic compounds	Thiophenes	2,5-disubstituted thiophenes			1.22171	-0.499381	2.98177	0.779553			0.602556	-0.915678	2.13707	0.753663
ACDOXXMFLCWEPV-UHFFFAOYSA-N	CC1=NC=CN=C1OC1C=CC=CC=1		CC1=NC=CN=C1OC1C=CC=CC=1	91137-78-9	2-methyl-3-phenoxypyrazine	186.214	-2.74819	2.05004	Organic compounds	Organic oxygen compounds	Organooxygen compounds	Ethers			1.53469	0.301282	2.3029	0.660371			0.939572	-0.314116	2.10259	0.64382
ACDSUMGMZHXCRO-UHFFFAOYSA-N	CC(C)=CCc1c(OC)c2c3oc4cc(O)ccc4c3c(=O)oc2cc1OC		CC(C)=CCc1c(OC)c2c3oc4cc(O)ccc4c3c(=O)oc2cc1OC	23013-85-6	3-O-Methylglycyrol	380.396	-70.5417	123.728	Organic compounds	Phenylpropanoids and polyketides	Isoflavonoids	Coumestans			2.00795	-0.697033	2.65343	0.767436			1.18614	-0.732847	2.58451	0.766224
ACDUHTSVVVHMGU-UHFFFAOYSA-N	CCCCCCCCCCCCCC(O)CC		CCCCCCCCCCCCCC(O)CC	593-03-3	Hexadecan-3-ol	242.447	131.924	-100.113	Organic compounds	Lipids and lipid-like molecules	Fatty Acyls	Fatty alcohols			2.31878	1.53447	2.85468	0.417743			1.88743	0.633768	2.76818	0.448177
ACDYWAIEHULRGT-UHFFFAOYSA-N	CC1C=CC(=CC=1)S(=O)(=O)NNC(=O)C1=CC(OC)=C(OC)C(=C1)OC		CC1C=CC(=CC=1)S(=O)(=O)NNC(=O)C1=CC(OC)=C(OC)C(=C1)OC	13513-93-4	["2'-(p-Tosyl)(3,4,5-trimethoxybenzo)hydrazide"]	380.422	-10.8739	102.486	Organic compounds	Benzenoids	Benzene and substituted derivatives	Benzenesulfonamides			1.93784	0.296492	2.64781	0.629613			1.28599	-0.200258	2.53701	0.640208
ACDZDIIWZVQMIX-UHFFFAOYSA-N	CCOC1=CC(Cl)=C(CS(=O)(=O)C2CC(C)(C)ON=2)C=C1Cl		CCOC1=CC(Cl)=C(CS(=O)(=O)C2CC(C)(C)ON=2)C=C1Cl	639826-16-7	Fenoxasulfone	366.266	-47.2905	-111.616	Organic compounds	Benzenoids	Benzene and substituted derivatives	Halobenzenes			0.871948	-1.19883	2.20709	0.745101			0.6179	-1.09883	2.06885	0.734324
ACDZNAKMZQTDJF-UHFFFAOYSA-N	CC1C=C(C=CC=1)C1C=C2C(=CC=1)N(CC1C=CC=CC=1)C=C2CC(N)=O		CC1C=C(C=CC=1)C1C=C2C(=CC=1)N(CC1C=CC=CC=1)C=C2CC(N)=O	910546-76-8	2-[1-Benzyl-5-(3-methylphenyl)-1H-indol-3-yl]acetamide	354.453	-67.4292	88.8004	Organic compounds	Organoheterocyclic compounds	Indoles and derivatives	N-alkylindoles			1.61525	0.0505316	2.45956	0.718101			1.09347	-0.218537	2.51129	0.741277
ACECEMRPKSUVBB-UHFFFAOYSA-N	CCN1N=NN=C1NC(=O)C1C=C(C=CC=1)OC		CCN1N=NN=C1NC(=O)C1C=C(C=CC=1)OC	638146-79-9	N-(1-ethyltetrazol-5-yl)-3-methoxybenzamide	247.258	-23.5164	-1.8393	Organic compounds	Benzenoids	Benzene and substituted derivatives	Benzoic acids and derivatives			1.77421	0.28379	2.53755	0.713336			1.04638	-0.287492	2.38969	0.69494
ACEFQZPFLLKDLL-UHFFFAOYSA-P	[NH4+].[NH4+].[N-]1N=NN=C1C1[N-]N=NN=1	[NH4+]	N1N=C(N=N1)C1N=NNN=1	3021-02-1	["Diammonium 5,5'-bitetrazolide"]	138.094	-59.0564	20.6079	Organic compounds	Organoheterocyclic compounds	Azoles	Tetrazoles		1.50821	1.47158	-0.00156518	2.43629	0.832038		1.88344	0.881181	-0.950306	2.28649	0.819476
ACEHBQPPDDGCGZ-UHFFFAOYSA-N	CC1NC2=CC=C(C=C2C=1CCN(C)C)OC		CC1NC2=CC=C(C=C2C=1CCN(C)C)OC	67292-68-6	5-Methoxy-N,N,2-trimethyl-1H-indole-3-ethanamine	232.327	-86.9496	83.8596	Organic compounds	Organoheterocyclic compounds	Indoles and derivatives	Tryptamines and derivatives			1.29102	-0.128536	2.24897	0.697288			0.850767	-0.427338	2.14382	0.72183
ACEKLXZRZOWKRY-UHFFFAOYSA-M	[O-]S(=O)(=O)C(F)(F)C(F)(F)C(F)(F)C(F)(F)C(F)(F)F		OS(=O)(=O)C(F)(F)C(F)(F)C(F)(F)C(F)(F)C(F)(F)F	175905-36-9	Perfluoropentanesulfonate	350.105	-16.2574	-149.015	Organic compounds	Organohalogen compounds	Alkyl halides	Alkyl fluorides			1.50094	-1.04234	2.67652	0.305335			-0.276221	-1.51179	1.62332	0.228599
ACEKLXZRZOWKRY-UHFFFAOYSA-N	OS(=O)(=O)C(F)(F)C(F)(F)C(F)(F)C(F)(F)C(F)(F)F		OS(=O)(=O)C(F)(F)C(F)(F)C(F)(F)C(F)(F)C(F)(F)F	2706-91-4	Perfluoropentanesulfonic acid	350.105	-12.2644	-149.121	Organic compounds	Organohalogen compounds	Alkyl halides	Alkyl fluorides			1.50094	-1.04234	2.67652	0.305335			-0.276221	-1.51179	1.62332	0.228599
ACEONLNNWKIPTM-UHFFFAOYSA-N	COC(=O)C(C)Br		COC(=O)C(C)Br	5445-17-0	Propanoic acid, 2-bromo-, methyl ester	167.002	93.1591	-25.3157	Organic compounds	Organic acids and derivatives	Carboxylic acids and derivatives	Carboxylic acid derivatives			0.998284	-0.596179	2.2955	0.643475			0.617016	-0.669566	2.11769	0.635269
ACERAJYCCLKTDM-UHFFFAOYSA-N	CN1C=C(C(O)=O)C2=CC(=CC=C12)S(=O)(=O)N(CC)CC		CN1C=C(C(O)=O)C2=CC(=CC=C12)S(=O)(=O)N(CC)CC	120729-97-7	1H-Indole-3-carboxylic acid, 5-((diethylamino)sulfonyl)-1-methyl-	310.375	-122.296	-52.2198	Organic compounds	Organoheterocyclic compounds	Indoles and derivatives	Indolecarboxylic acids and derivatives			1.83481	0.205767	2.55223	0.719645			1.04257	-0.599487	2.37292	0.747997
ACERFIHBIWMFOR-UHFFFAOYSA-N	CC(C)(CO)NCC(O)CS(O)(=O)=O		CC(C)(CO)NCC(O)CS(O)(=O)=O	68399-79-1	1-Propanesulfonic acid, 2-hydroxy-3-[(2-hydroxy-1,1-dimethylethyl)amino]-	227.282	43.9746	-97.9353	Organic compounds	Organic acids and derivatives	Organic sulfonic acids and derivatives	Organosulfonic acids and derivatives			2.07593	0.810399	2.71966	0.681934			1.59502	0.0272159	2.79262	0.731505
ACEWLPOYLGNNHV-UHFFFAOYSA-N	CC(C)CC1C=CC(=CC=1)C(C)C(=O)OCC1=CC=CC=N1		CC(C)CC1C=CC(=CC=1)C(C)C(=O)OCC1=CC=CC=N1	64622-45-3	Ibuprofen piconol	297.398	-34.441	-49.4731	Organic compounds	Lipids and lipid-like molecules	Prenol lipids	Monoterpenoids			1.57826	0.107868	2.41392	0.671849			1.01356	-0.212808	2.34707	0.700789
ACEWUDFEONXYQH-UHFFFAOYSA-N	CC1=CC=CC2CCCC(=O)C=21		CC1=CC=CC2CCCC(=O)C=21	51015-28-2	1(2H)-Naphthalenone, 3,4-dihydro-8-methyl-	160.216	-24.7211	65.4425	Organic compounds	Benzenoids	Tetralins				1.45663	0.16239	2.25462	0.711476			1.07026	-0.473702	2.0196	0.682282
ACEYAMOAGUDVAQ-UHFFFAOYSA-N	CCC(Br)(CC)C(N)=O		CCC(Br)(CC)C(N)=O	511-70-6	Diethylbromoacetamide	194.072	59.3844	-105.853	Organic compounds	Lipids and lipid-like molecules	Fatty Acyls	Fatty amides			0.911341	-0.71195	2.26792	0.69213			0.76111	-0.583504	2.17248	0.672944
ACFGRWJEQJVZTM-LEJBHHMKSA-L	[Mg+2].[O-]C1C(OC(=O)C=1OP([O-])(O)=O)C(O)CO	[Mg+2]	OC1C(OC(=O)C=1OP(O)(O)=O)C(O)CO	114040-31-2	L-Ascorbic acid, mono(dihydrogen phosphate), magnesium salt (1:1)	256.103	156.52	13.5121	Organic compounds	Organoheterocyclic compounds	Dihydrofurans	Furanones			1.59144	-1.26604	2.50014	0.773875			1.20353	-1.76344	2.93654	0.740977
ACFHHZJOAUZSJU-XBXARRHUSA-N	CC(=O)NN=CC1=CC=C(O1)[N+]([O-])=O		CC(=O)N=NCC1=CC=C(O1)[N+]([O-])=O	67-28-7	Nihydrazone	197.15	-111.7	23.9151	Organic compounds	Organoheterocyclic compounds	Furans	Nitrofurans			1.44695	0.0546868	2.44347	0.62366			0.741306	-0.48338	2.77062	0.619684
ACFIXJIJDZMPPO-NNYOXOHSSA-N	NC(=O)C1CC=CN(C=1)C1OC(COP(O)(=O)OP(O)(=O)OCC2OC(C(OP(O)(O)=O)C2O)N2C=NC3C2=NC=NC=3N)C(O)C1O		NC(=O)C1CC=CN(C=1)C1OC(COP(O)(=O)OP(O)(=O)OCC2OC(C(OP(O)(O)=O)C2O)N2C=NC3C2=NC=NC=3N)C(O)C1O	53-57-6	NADPH	745.425	33.9507	125.368	Organic compounds	Nucleosides, nucleotides, and analogues	(5'-5')-dinucleotides				1.87185	-0.819079	2.71916	0.826018			1.3646	-1.55492	3.26836	0.839792
ACFJNTXCEQCDBX-UHFFFAOYSA-N	COC1C=C(CC#N)C=C(OC)C=1OC		COC1C=C(CC#N)C=C(OC)C=1OC	13338-63-1	3,4,5-Trimethoxyphenylacetonitrile	207.229	-26.0622	111.693	Organic compounds	Benzenoids	Benzene and substituted derivatives	Benzyl cyanides			1.57304	0.134392	2.45647	0.702181			0.965602	-0.429939	2.35721	0.69192
ACFMNXXTNNRFNY-UHFFFAOYSA-N	Cl.CN(C)CCCOC1C=C(O)C(=CC=1)C(=O)C1C=CC=CC=1	Cl	CN(C)CCCOC1C=C(O)C(=CC=1)C(=O)C1C=CC=CC=1	83803-89-8	4-(3-(Dimethylamino)propoxy)-2-hydroxybenzophenone hydrochloride	299.37	-6.33694	-79.9291	Organic compounds	Benzenoids	Benzene and substituted derivatives	Benzophenones			1.85348	0.522884	2.55424	0.498246			1.14421	-0.172198	2.4148	0.587262
ACFQKNIZLQUKQA-FPLPWBNLSA-N	CCCCC=CC(C)(C)O		CCCCC=CC(C)(C)O	18521-07-8	3-OCTEN-2-OL, 2-METHYL-, (Z)-	142.242	142.86	-69.482	Organic compounds	Organic oxygen compounds	Organooxygen compounds	Alcohols and polyols			1.93057	0.931355	2.52462	0.599098			1.55244	0.563421	2.34065	0.603595
ACFSBQWDVYWNRT-UHFFFAOYSA-N	N#CC1C=CC(CN2C=NC=C2CO)=CC=1		N#CC1C=CC(CN2C=NC=C2CO)=CC=1	183500-36-9	4-[[5-(hydroxymethyl)imidazol-1-yl]methyl]benzonitrile	213.24	-71.8545	-37.7101	Organic compounds	Benzenoids	Benzene and substituted derivatives	Benzonitriles			1.76907	0.024964	2.45094	0.726291			0.928217	-0.585849	2.28152	0.725522
ACFSQHQYDZIPRL-UHFFFAOYSA-N	[Li+].O=S(=O)([N-]S(=O)(=O)C(F)(F)C(F)(F)F)C(F)(F)C(F)(F)F	[Li+]	O=S(=O)(NS(=O)(=O)C(F)(F)C(F)(F)F)C(F)(F)C(F)(F)F	132843-44-8	Lithium bis[(pentafluoroethyl)sulfonyl]azanide	381.169	-13.985	-148.016	Organic compounds	Organic acids and derivatives	Organic sulfonic acids and derivatives	Organosulfonic acids and derivatives			1.13833	-0.978325	2.41351	0.570584			0.310687	-1.56928	2.49358	0.641904
ACFVGWNYKXYWHV-UHFFFAOYSA-N	CC(C)=CCCC(C)CC(=O)OC(C)C		CC(C)=CCCC(C)CC(=O)OC(C)C	26728-45-0	Propan-2-yl 3,7-dimethyloct-6-enoate	212.333	128.479	12.8232	Organic compounds	Lipids and lipid-like molecules	Prenol lipids	Monoterpenoids			1.94952	0.9272	2.57234	0.529798			1.71564	0.450414	2.48122	0.530537
ACFYUJLIWIDSFM-UHFFFAOYSA-N	CC1(C)C=C(C(N)=O)C(C)(C)N1		CC1(C)C=C(C(N)=O)C(C)(C)N1	19805-75-5	1H-Pyrrole-3-carboxamide, 2,5-dihydro-2,2,5,5-tetramethyl-	168.24	12.2702	14.9677	Organic compounds	Organoheterocyclic compounds	Pyrrolines	Pyrroline carboxylic acids and derivatives			1.65981	0.278643	2.42443	0.778572			1.14774	-0.382233	2.23118	0.771032
ACGDKVXYNVEAGU-UHFFFAOYSA-N	NC(=N)NCCN1CCCCCCC1		NC(=N)NCCN1CCCCCCC1	55-65-2	Guanethidine	198.314	59.2645	19.2939	Organic compounds	Organic nitrogen compounds	Organonitrogen compounds	Guanidines			1.71425	0.344525	2.52757	0.742466			0.935487	-0.540623	2.18138	0.744577
ACGHJVZDNQZJOV-BMOJZYMJSA-N	CC1(C)CC2C3=C(C(OCC=C(C)C)C4(O)C(=O)N5CCCC5C(=O)N42)C2=CC=C(C=C2N3C(C=C(C)C)OO1)OC		CC1(C)CC2C3=C(C(OCC=C(C)C)C4(O)C(=O)N5CCCC5C(=O)N42)C2=CC=C(C=C2N3C(C=C(C)C)OO1)OC	12626-18-5	Fumitremorgin A	579.694	-28.1654	143.608	Organic compounds	Organoheterocyclic compounds	Indoles and derivatives	Pyridoindoles			1.92825	-0.771331	2.79195	0.801275			0.878186	-1.47652	2.64842	0.795553
ACGNVBRAISEVDK-RPIQFHTISA-N	CC(=O)OC1CC2=CC=C3C4CCC(C(C)CCCC(C)C)C4(C)CCC3C2(C)CC1		CC(=O)OC1CC2=CC=C3C4CCC(C(C)CCCC(C)C)C4(C)CCC3C2(C)CC1	1059-86-5	Cholesta-5,7-dien-3-yl acetate	426.685	104.645	132.291	Organic compounds	Lipids and lipid-like molecules	Steroids and steroid derivatives	Cholestane steroids			1.89216	-3.29818	2.66464	0.722532			0.871199	-3.2717	2.4131	0.736846
ACGQTBAFQLDLFS-UHFFFAOYSA-N	CCCCCCCCCCN1C(=O)C(NC1=S)(C1C=CC=CC=1)C1C=CC=CC=1		CCCCCCCCCCN1C(=O)C(NC1=S)(C1C=CC=CC=1)C1C=CC=CC=1	875014-22-5	3-decyl-5,5-diphenyl-2-sulfanylideneimidazolidin-4-one	408.611	45.534	65.6966	Organic compounds	Benzenoids	Benzene and substituted derivatives	Diphenylmethanes			1.34218	-2.29204	2.43798	0.643224			0.994581	-0.490717	2.77872	0.658592
ACGSLLPQEVTPIJ-UHFFFAOYSA-N	CC1=CC(=CC=C1CC=O)C(C)(C)C		CC1=CC(=CC=C1CC=O)C(C)(C)C	94108-57-3	(4-tert-Butyl-2-methylphenyl)acetaldehyde	190.286	-71.4724	-21.8732	Organic compounds	Benzenoids	Benzene and substituted derivatives	Phenylacetaldehydes			1.46607	0.329021	2.26505	0.65813			1.01756	0.0233047	2.05251	0.691922
ACGUMJCTUKRBQF-UHFFFAOYSA-N	CCCCOC(=O)N(CCCC)C1C=CC=CC=1		CCCCOC(=O)N(CCCC)C1C=CC=CC=1	7249-59-4	Butyl butyl(phenyl)carbamate	249.354	-3.13114	-72.1166	Organic compounds	Benzenoids	Benzene and substituted derivatives	Phenylcarbamic acid esters			1.47864	0.301491	2.30572	0.534516			0.982987	-0.372482	2.24143	0.536711
ACGUYXCXAPNIKK-UHFFFAOYSA-N	OC1C(CC2C(Cl)=C(Cl)C=C(Cl)C=2O)=C(Cl)C(Cl)=CC=1Cl		OC1C(CC2C(Cl)=C(Cl)C=C(Cl)C=2O)=C(Cl)C(Cl)=CC=1Cl	70-30-4	Hexachlorophene	406.907	-87.7529	-1.33636	Organic compounds	Benzenoids	Benzene and substituted derivatives	Diphenylmethanes			1.27517	-0.704588	2.6875	0.680982		-0.575114	0.479327	-4.39428	2.09089	0.583138
ACGVGZXQYDMQFI-UHFFFAOYSA-N	CCCCCCCCCCCCCCCCCCC(=O)OC(C)C		CCCCCCCCCCCCCCCCCCC(=O)OC(C)C	27593-69-7	Isopropyl nonadecan-1-oate	340.592	125.875	-29.1027	Organic compounds	Lipids and lipid-like molecules	Fatty Acyls	Fatty acid esters			2.39611	1.45684	2.89977	0.304067			2.05189	1.08015	2.96985	0.352088
ACGVKXZPAUDGMM-UHFFFAOYSA-N	CC1=CC=C(C=C1)S(=O)(=O)CC(N)=O		CC1=CC=C(C=C1)S(=O)(=O)CC(N)=O	52345-47-8	Acetamide, 2-[(4-methylphenyl)sulfonyl]-	213.258	-120.941	-47.367	Organic compounds	Benzenoids	Benzene and substituted derivatives	Toluenes			1.79192	0.193561	2.52423	0.541821			1.5354	-0.332605	2.58577	0.588605
ACGWDKQZTFRUKO-UHFFFAOYSA-N	CCCCCCCCCCCCCCCCNCCNCCNCC(O)=O		CCCCCCCCCCCCCCCCNCCNCCNCC(O)=O	122769-94-2	Hexadecylaminoethylaminoethylglycine	385.637	70.5669	-42.9923	Organic compounds	Organic acids and derivatives	Carboxylic acids and derivatives	Amino acids, peptides, and analogues			2.15735	0.112109	2.83757	0.481481			2.04302	-0.0093149	3.20756	0.481481
ACGXIFQKQYZLOU-UHFFFAOYSA-N	OC1C=C2OC(=CC3C=CC(O)=CC=3)C(=O)C2=C(O)C=1		OC1C=C2OC(=CC3C=CC(O)=CC=3)C(=O)C2=C(O)C=1	25078-14-2	4,4â€²,6-Trihydroxyaurone	270.24	4.66521	134.242	Organic compounds	Phenylpropanoids and polyketides	Aurone flavonoids				1.97783	0.112979	2.75381	0.735167			1.46268	-0.211692	2.6612	0.758264
ACGYFGHQFAXLCI-UHFFFAOYSA-N	CCOC(=O)C1=CC(=C(O)C(=C1)C(C)(C)C)C(C)(C)C		CCOC(=O)C1=CC(=C(O)C(=C1)C(C)(C)C)C(C)(C)C	1620-64-0	Benzoic acid, 3,5-bis(1,1-dimethylethyl)-4-hydroxy-, ethyl ester	278.392	15.3489	-13.0358	Organic compounds	Benzenoids	Benzene and substituted derivatives	Benzoic acids and derivatives			1.5849	0.396643	2.42996	0.523235			1.16815	-0.0495408	2.26118	0.51377
ACGZBRWTWOZSFU-UHFFFAOYSA-N	CCN(CC#CCO)CC		CCN(CC#CCO)CC	10575-25-4	4-(Diethylamino)-2-butyn-1-ol	141.214	101.083	-101.752	Organic compounds	Organic nitrogen compounds	Organonitrogen compounds	Amines			1.69353	0.467658	2.42218	0.665067			1.01188	-0.555316	2.11749	0.711421
ACHKGDKYEZFMQD-UHFFFAOYSA-N	CC1=C(Br)C=NC2=CC=CC=C21		CC1=C(Br)C=NC2=CC=CC=C21	59280-69-2	3-BROMO-4-METHYLQUINOLINE	222.085	-90.7373	41.9851	Organic compounds	Organoheterocyclic compounds	Quinolines and derivatives	Haloquinolines			1.15012	-0.583933	2.32907	0.749716			0.854965	-0.550333	2.23515	0.736579
ACHKKGDWZVCSNH-UHFFFAOYSA-N	Cl.NC1N=C(N)C(=NC=1Cl)C(=O)NC(N)=N	Cl	NC1N=C(N)C(=NC=1Cl)C(=O)NC(N)=N	2016-88-8	Amiloride hydrochloride	229.631	-21.5174	6.58471	Organic compounds	Organoheterocyclic compounds	Diazines	Pyrazines			1.80582	-0.556038	2.69793	0.714676			1.05817	-1.34639	2.71201	0.74962
ACHKLMSVYVYVNF-UHFFFAOYSA-N	CC(C)=C1CC2=CC=CC=C2C1=O		CC(C)=C1CC2=CC=CC=C2C1=O	5706-00-3	2-isopropylidene-1-indanone	172.227	-32.5002	67.4717	Organic compounds	Benzenoids	Indanes	Indanones			1.58485	0.447656	2.30866	0.682907			1.13037	-0.231469	2.09289	0.656266
ACHWEOLUTJAHLV-ZETCQYMHSA-N	CCOC(=O)C(N)CC1=CNC=N1		CCOC(=O)C(N)CC1=CNC=N1	7555-06-8	Ethyl L-histidinate	183.211	26.5979	-26.6958	Organic compounds	Organic acids and derivatives	Carboxylic acids and derivatives	Amino acids, peptides, and analogues			1.81105	0.113924	2.53382	0.699438			1.19776	-0.206613	2.80056	0.69986
ACHWKVVBZRANAV-UHFFFAOYSA-N	CC1=CC=CC=C1CC=O		CC1=CC=CC=C1CC=O	10166-08-2	Benzeneacetaldehyde, 2-methyl-	134.178	-75.3767	-25.8756	Organic compounds	Benzenoids	Benzene and substituted derivatives	Phenylacetaldehydes			1.52853	0.70068	2.17465	0.58014			1.4193	0.181458	2.30852	0.578235
ACIJGUBIMXQCMF-BYPYZUCNSA-N	NC(CCC(=O)NCC(O)=O)C(O)=O		NC(CCC(=O)NCC(O)=O)C(O)=O	6729-55-1	5-[(Carboxymethyl)imino]-5-hydroxynorvaline	204.182	34.5053	-53.43	Organic compounds	Organic acids and derivatives	Carboxylic acids and derivatives	Amino acids, peptides, and analogues			2.03062	0.82745	2.67062	0.558782			2.23857	0.473433	3.27804	0.525689
ACILOBIGHMHPBG-UHFFFAOYSA-N	O=C(Br)C(F)(F)C(F)(F)C(F)(F)C(F)(F)C(F)(F)F		O=C(Br)C(F)(F)C(F)(F)C(F)(F)C(F)(F)C(F)(F)F	1404193-66-3	Undecafluorohexanoyl bromide	376.947	5.60137	-134.124	Organic compounds	Organohalogen compounds	Acyl halides	Acyl bromides			1.02151	-1.09315	2.39345	0.499301			-0.0715697	-1.93182	2.02636	0.522834
ACIMQXSSGMWVKG-UHFFFAOYSA-N	NCCC1C(Cl)=CC=CC=1Cl		NCCC1C(Cl)=CC=CC=1Cl	14573-23-0	2,6-Dichlorophenethylamine	190.073	-79.3833	-20.6798	Organic compounds	Benzenoids	Benzene and substituted derivatives	Phenethylamines			1.29961	-0.731578	4.09455	0.636905			0.678714	-0.954158	1.93271	0.615801
ACIMRXKJKQGBGL-UHFFFAOYSA-N	NCCNS(=O)(=O)C1=CC=CC2C1=CC=CC=2Cl		NCCNS(=O)(=O)C1=CC=CC2C1=CC=CC=2Cl	83298-75-3	N-(2-Aminoethyl)-5-chloronaphthalene-1-sulfonamide	284.768	-122.793	-58.0017	Organic compounds	Benzenoids	Naphthalenes	Naphthalene sulfonic acids and derivatives			1.33921	-0.405998	2.43953	0.729868			0.928111	-0.346802	2.23085	0.74176
ACIOTABAIKUNQD-SECBINFHSA-N	NC(CC1=CC=C(C=C1)[N+]([O-])=O)(C(O)=O)[N+]([O-])=O		NC(CC1=CC=C(C=C1)[N+]([O-])=O)(C(O)=O)[N+]([O-])=O	49607-21-8	alpha,4-Dinitrophenylalanine	255.186	-120.87	-11.7276	Organic compounds	Phenylpropanoids and polyketides	Phenylpropanoic acids				1.69987	0.163447	2.49568	0.606732			0.88645	-0.683751	2.58154	0.564689
ACIOXMJZEFKYHZ-BXKDBHETSA-N	NC1C2SCC(C[N+]3C=CC=CC=3)=C(C([O-])=O)N2C1=O		NC1C2SCC(C[N+]3C=CC=CC=3)=C(C([O-])=O)N2C1=O	3432-88-0	N-(7-Aminocephem-3-em-3-ylmethyl)pyridinium-4-carboxylate	291.332	54.1514	113.821	Organic compounds	Organic acids and derivatives	Carboxylic acids and derivatives	Amino acids, peptides, and analogues			1.20171	-2.444	2.42464	0.797592			1.26098	-0.796168	2.56403	0.745192
ACIUFBMENRNYHI-UHFFFAOYSA-N	C1=NC=CC2=C3C=CC4C=CC=CC=4C3=CC=C21		C1=NC=CC2=C3C=CC4C=CC=CC=4C3=CC=C21	218-02-0	Naphth(2,1-f)isoquinoline	229.282	-108.125	43.8586	Organic compounds	Benzenoids	Phenanthrenes and derivatives				1.43178	-0.589165	2.34963	0.704561			1.01139	-0.364737	2.51343	0.669023
ACIXJWKFKMGNIK-UHFFFAOYSA-M	[I-].C[N+](CC(O)CC(F)(F)C(F)(F)C(F)(F)C(F)(F)C(F)(F)C(F)(F)C(F)(F)C(F)(F)C(F)(C(F)(F)F)C(F)(F)F)(CCO)CCO	[I-]	C[N+](CC(O)CC(F)(F)C(F)(F)C(F)(F)C(F)(F)C(F)(F)C(F)(F)C(F)(F)C(F)(F)C(F)(C(F)(F)F)C(F)(F)F)(CCO)CCO	94159-77-0	Bis(2-hydroxyethyl)methyl(1-(perfluoro-9-methyldecyl))-2-hydroxyprop-3-ylammonium iodide	746.319	12.6784	-168.369	Organic compounds	Organic nitrogen compounds	Organonitrogen compounds	Quaternary ammonium salts			-0.565401	-0.824951	2.39727	0.722721			0.946119	-1.33775	2.80134	0.730885
ACJBRZHLANZBOR-ZSCHJXSPSA-N	NCCCCC(N)C(O)=O.OC(=O)C(=O)CC1C=CC=CC=1	NCCCCC(C(=O)O)N	OC(=O)C(=O)CC1C=CC=CC=1	78000-36-9	L-Lysine mono(benzenepyruvate)	164.16	29.5993	-60.082	Organic compounds	Benzenoids	Benzene and substituted derivatives	Phenylpyruvic acid derivatives			1.86843	0.724969	2.55383	0.492182			1.70269	0.169158	2.84415	0.592647
ACJLWHXJMCBSPX-UHFFFAOYSA-M	CN(CC)C1=CC2=[O+]C3=CC(=CC=C3N=C2C=C1C)N(CCC#N)CC.[O-]C=O	[O-]C=O	CN(CC)c1cc2oc3cc(ccc3[n]c2cc1C)N(CCC#N)CC	97952-45-9	7-[(2-Cyanoethyl)(ethyl)amino]-3-[ethyl(methyl)amino]-2-methylphenoxazin-5-ium formate	349.458	-132.767	-76.336	Organic compounds	Organoheterocyclic compounds	Benzoxazines	Phenoxazines			1.67524	-0.369917	2.60714	0.746031			1.12742	-0.236086	2.53708	0.832413
ACJOYTKWHPEIHW-UHFFFAOYSA-N	CCOC(=O)C#CC1C=CC=CC=1		CCOC(=O)C#CC1C=CC=CC=1	2216-94-6	Ethyl phenylpropiolate	174.199	-20.1324	-41.2301	Organic compounds	Lipids and lipid-like molecules	Fatty Acyls	Fatty acid esters			1.76908	0.210849	2.55033	0.579662			1.34916	-0.26273	2.41611	0.587611
ACJPFLIEHGFXGP-UHFFFAOYSA-N	CC1(C)CC(=O)OC1=O		CC1(C)CC(=O)OC1=O	17347-61-4	2,2-Dimethylsuccinic anhydride	128.127	70.9529	73.5503	Organic compounds	Organic acids and derivatives	Carboxylic acids and derivatives	Dicarboxylic acids and derivatives			1.82695	0.580212	2.46028	0.74554			1.39383	-0.363239	2.58734	0.774084
ACJZSAIXKMKOEZ-UHFFFAOYSA-O	C[N+](C)(C)C1C=C2C(N=NC3=CC=C(N)C=C3[N+]([O-])=O)=C(O)C=CC2=CC=1		C[N+](C)(C)C1=CC2=C(N=NC3=CC=C(N)C=C3[N+]([O-])=O)C(O)=CC=C2C=C1	30075-29-7	8-[2-(4-Amino-2-nitrophenyl)diazenyl]-7-hydroxy-N,N,N-trimethyl-2-naphthalenaminium	366.401	-161.331	-1.83263	Organic compounds	Benzenoids	Naphthalenes				2.0244	0.616301	2.63771	0.62357			1.96389	-0.065782	2.75159	0.618987
ACKALUBLCWJVNB-UHFFFAOYSA-N	CC(OC(C)=O)OC(C)=O		CC(OC(C)=O)OC(C)=O	542-10-9	1,1-Ethanediol diacetate	146.142	117.134	-26.4644	Organic compounds	Organic acids and derivatives	Carboxylic acids and derivatives	Carboxylic acid derivatives			2.02866	0.738694	2.68754	0.509974			1.66675	-0.398099	2.7741	0.601075
ACKDPCGYJPVFKO-UHFFFAOYSA-N	CC1C=CC(=CC=1)C1=CC=CC=C1C1=CNN=N1		CC1C=CC(=CC=1)C1=CC=CC=C1C1=CNN=N1	114772-80-4	["4-(4'-Methyl[1,1'-biphenyl]-2-yl)-2H-1,2,3-triazole"]	235.29	-59.6458	23.5863	Organic compounds	Benzenoids	Benzene and substituted derivatives	Biphenyls and derivatives			1.44271	-0.417671	2.28199	0.716972			0.83815	-0.378661	2.07656	0.716213
ACKJQSTXPUVROE-UHFFFAOYSA-N	NC1C=CC(=CC=1)NC1=CC=C(C=C1N)S(O)(=O)=O		NC1C=CC(=CC=1)NC1=CC=C(C=C1N)S(O)(=O)=O	97-34-7	Benzenesulfonic acid, 3-amino-4-[(4-aminophenyl)amino]-	279.321	-133.422	-29.811	Organic compounds	Benzenoids	Benzene and substituted derivatives	Benzenesulfonic acids and derivatives			1.95275	0.710665	2.52103	0.523195			1.28971	-0.211688	2.68684	0.578969
ACKODFNIGGGCBA-UHFFFAOYSA-N	NC(=O)C1CC2(CC(C2)C(N)=O)C1		NC(=O)C1CC2(CC(C2)C(N)=O)C1	707-45-9	Spiro(3.3)heptane-2,6-dicarboxamide	182.223	92.6817	34.3307	Organic compounds	Organic acids and derivatives	Carboxylic acids and derivatives	Carboxylic acid derivatives			1.66273	-3.67036	2.46031	0.75609			1.02711	-2.12494	2.25873	0.74309
ACKSCWQUPJXVIC-UHFFFAOYSA-N	NNC(=S)NC1=CC=C(Br)C=C1		NNC(=S)NC1=CC=C(Br)C=C1	2646-31-3	4-(4-Bromophenyl)thiosemicarbazide	246.133	-80.9749	-59.5948	Organic compounds	Benzenoids	Benzene and substituted derivatives	Halobenzenes			0.946167	-0.519855	2.29908	0.667924			0.711112	-0.561608	2.15976	0.715214
ACKWHAMNCLDPRO-UHFFFAOYSA-N	CC#CC#CC#CC1C=CC=CC=1		CC#CC#CC#CC1C=CC=CC=1	4300-27-0	Phenylheptatriyne	164.207	-55.8527	-57.2715	Organic compounds	Benzenoids	Benzene and substituted derivatives				1.47904	0.261277	2.24805	0.71695			1.02423	-0.673299	2.15293	0.703987
ACKWMZRBCBIVRX-UHFFFAOYSA-N	[N-]=[N+]=C1C=CC2C(=CC=CC=2C1=O)S(=O)(=O)OC1C=CC2=CC=CC=C2C=1CC1C(=CC=C2C=CC=CC2=1)OS(=O)(=O)C1=CC=CC2=C1C=CC(=[N+]=[N-])C2=O		[N-]=[N+]=C1C=CC2C(=CC=CC=2C1=O)S(=O)(=O)OC1C=CC2=CC=CC=C2C=1CC1C(=CC=C2C=CC=CC2=1)OS(=O)(=O)C1=CC=CC2=C1C=CC(=[N+]=[N-])C2=O	33910-44-0	1-Naphthalenesulfonic acid, 6-diazo-5,6-dihydro-5-oxo-, 1,1â€²-(methylenedi-1,2-naphthalenediyl) ester	764.797	-141.441	48.05	Organic compounds	Benzenoids	Naphthalenes	Naphthalene sulfonic acids and derivatives			2.33807	0.768769	2.95478	0.669979			1.75248	-0.458592	2.8442	0.782287
ACLJAFRNPZVVIW-ADFGDECNSA-N	CC12CCC(CC1CCC1C2CCC2(C)C(CCC21O)C1=CCOC1=O)OC1OC(CO)C(O)C(O)C1O		CC12CCC(CC1CCC1C2CCC2(C)C(CCC21O)C1=CCOC1=O)OC1OC(CO)C(O)C(O)C1O	36983-69-4	Actodigin	536.662	85.7231	126.672	Organic compounds	Lipids and lipid-like molecules	Steroids and steroid derivatives	Steroidal glycosides			1.90292	-2.08942	2.76529	0.752146			0.871655	-2.34047	2.67352	0.754143
ACLJLSKRXVFLTA-MVJHLKBCSA-N	CCCCCCCCCCCCCCCCS(=O)(=O)C1=CC=C(C=C1C(O)=O)S(=O)(=O)NN=c1[s]c2ccc(cc2[n]1C)S(O)(=O)=O		CCCCCCCCCCCCCCCCS(=O)(=O)C1=CC=C(C=C1C(O)=O)S(=O)(=O)NN=c1[s]c2ccc(cc2[n]1C)S(O)(=O)=O	29338-10-1	2-(Hexadecane-1-sulfonyl)-5-[(2Z)-2-(3-methyl-5-sulfo-1,3-benzothiazol-2(3H)-ylidene)hydrazinesulfonyl]benzoic acid	731.981	-28.005	-108.127	Organic compounds	Benzenoids	Benzene and substituted derivatives	Benzenesulfonamides			2.19874	0.443794	2.87597	0.73871			1.68349	-0.941748	2.74283	0.741501
ACLZPKMBZBHXJZ-UHFFFAOYSA-N	C1=CC=CC=C1NC1NN=NC=1C1C=CC=CC=1		C1=CC=CC=C1NC1NN=NC=1C1C=CC=CC=1	53684-55-2	N,5-diphenyl-2H-triazol-4-amine	236.278	-62.8489	37.2245	Organic compounds	Organoheterocyclic compounds	Azoles	Triazoles			1.38861	0.0217212	2.27979	0.654846			0.87272	-0.318626	2.16381	0.675954
ACLZYRNSDLQOIA-UHFFFAOYSA-N	CC1=CC=CC=C1NC(N)=S		CC1=CC=CC=C1NC(N)=S	614-78-8	(2-Methylphenyl)thiourea	166.249	-90.6472	-37.8648	Organic compounds	Benzenoids	Benzene and substituted derivatives	N-phenylthioureas			1.02224	-0.573607	4.03854	0.559735			0.821915	-0.484947	2.00061	0.565588
ACMBVSPXQQUNOF-UHFFFAOYSA-N	CCCCCCCCCC(O)CCCCCCCCC		CCCCCCCCCC(O)CCCCCCCCC	16840-84-9	Nonadecan-10-ol	284.528	131.976	-100.7	Organic compounds	Lipids and lipid-like molecules	Fatty Acyls	Fatty alcohols			2.34307	1.41567	2.85967	0.323862			1.86468	0.250077	2.84235	0.382381
ACMJJQYSPUPMPN-UHFFFAOYSA-N	NC1=CC=C(Cl)C(F)=C1		NC1=CC=C(Cl)C(F)=C1	367-22-6	4-Chloro-3-fluoroaniline	145.564	-94.7615	-12.635	Organic compounds	Benzenoids	Benzene and substituted derivatives	Aniline and substituted anilines			1.01176	-0.93263	3.97578	0.585769			0.738407	-0.507778	1.91556	0.607168
ACMLKANOGIVEPB-UHFFFAOYSA-N	OC(=O)c1cc2ccccc2oc1=O		OC(=O)c1cc2ccccc2oc1=O	531-81-7	Coumarin-3-carboxylic acid	190.154	-82.8697	104.539	Organic compounds	Phenylpropanoids and polyketides	Coumarins and derivatives				1.77595	0.729086	2.59233	0.610603			1.74878	0.28773	2.7749	0.577665
ACMOQOXIPPKBFU-GFULKKFKSA-N	O=C1OCCC1=COCCCOC=C1CCOC1=O		O=C1OCCC1=COCCCOC=C1CCOC1=O	67194-28-9	["(3E,3'E)-3,3'-{Propane-1,3-diylbis[oxy(E)methanylylidene]}di(oxolan-2-one)"]	268.265	69.7138	64.4873	Organic compounds	Organoheterocyclic compounds	Lactones	Gamma butyrolactones			2.02212	0.579704	2.77954	0.765017			1.6996	-0.0629501	2.89388	0.782852
ACMXQHFNODYQAT-UHFFFAOYSA-N	O=C(CC1C=CC=CC=1)N=C(NOCC1CC1)C1=C(C=CC(F)=C1F)C(F)(F)F		O=C(CC1C=CC=CC=1)N=C(NOCC1CC1)C1=C(C=CC(F)=C1F)C(F)(F)F	180409-60-3	Cyflufenamid	412.358	16.9401	10.8913	Organic compounds	Benzenoids	Benzene and substituted derivatives	Trifluoromethylbenzenes			1.02129	-0.393382	2.34845	0.732306			0.607045	-1.06112	2.50075	0.758874
ACNAFCGCINVEDL-GXKRWWSZSA-L	[K+].[K+].C=CCCCCCCCCC(=O)NC(CCC([O-])=O)C([O-])=O	[K+]	C=CCCCCCCCCC(=O)NC(CCC(O)=O)C(O)=O	280576-97-8	Dipotassium undecylenoyl glutamate	313.394	41.0621	-41.0388	Organic compounds	Organic acids and derivatives	Carboxylic acids and derivatives	Amino acids, peptides, and analogues			2.08435	0.625443	2.69788	0.572225			1.95228	0.356818	3.185	0.613383
ACNBBQGAWMHXLA-UHFFFAOYSA-N	N#CC1=CC=CC=C1OC(F)(F)F		N#CC1=CC=CC=C1OC(F)(F)F	63968-85-4	2-(Trifluoromethoxy)benzonitrile	187.12	-84.5355	-22.2373	Organic compounds	Benzenoids	Phenol ethers				1.19754	-0.630125	2.28466	0.728732			0.517728	-1.49631	2.06981	0.728732
ACNHBCIZLNNLRS-UBGQALKQSA-N	CC(C)(O)C1OC2CCC3(C)C(O)(CCC4CC5=C(NC6=CC=CC=C56)C34C)C2=CC1=O		CC(C)(O)C1OC2CCC3(C)C(O)(CCC4CC5=C(NC6=CC=CC=C56)C34C)C2=CC1=O	1233509-81-3	2H-Pyrano[2â€²â€²,3â€²â€²:5â€²,6â€²]benz[1â€²,2â€²:6,7]indeno[1,2-b]indol-3(4bH)-one, 5,6,6a,7,12,12b,12c,13,14,14a-decahydro-4b-hydroxy-2-(1-hydroxy-1-methylethyl)-12b,12c-dimethyl-, (2R,4bS,6aS,12bS,12cR,14aS)-rel-	435.564	-37.1746	140.696	Organic compounds	Organoheterocyclic compounds	Naphthopyrans				1.25687	-3.28521	2.49174	0.804483			0.739872	-3.25323	2.45395	0.793913
ACNHBJQDDXQFAT-UHFFFAOYSA-K	[Sb+3].CCCCCN(CCCCC)C([S-])=S.CCCCCN(CCCCC)C([S-])=S.CCCCCN(CCCCC)C([S-])=S	[Sb+3]	CCCCCN(CCCCC)C(S)=S	15890-25-2	Antimony diamyldithiocarbamate	233.446	66.2635	-90.7006	Organic compounds	Organic salts	Organic metal salts	Organic metalloid salts			0.797556	-0.38267	2.01578	0.484224		2.03138	0.762474	-0.589064	1.86419	0.484224
ACNQJGLSENYFQJ-UHFFFAOYSA-N	ClC1C=C(C=CC=1)C(Cl)Cl		ClC1C=C(C=CC=1)C(Cl)Cl	15145-69-4	1-Chloro-3-(dichloromethyl)benzene	195.476	-57.8081	-35.8825	Organic compounds	Benzenoids	Benzene and substituted derivatives	Halobenzenes			1.15397	-0.591065	2.285	0.607429			0.887951	-0.939122	2.5375	0.590606
ACNUVXZPCIABEX-UHFFFAOYSA-N	NC1C=C2OC3=CC(N)=CC=C3C3(OC(=O)C4=CC=CC=C34)C2=CC=1		NC1C=C2OC3=CC(N)=CC=C3C3(OC(=O)C4=CC=CC=C34)C2=CC=1	509-72-8	["3',6'-Diaminofluoran"]	330.343	-119.598	108.075	Organic compounds	Organoheterocyclic compounds	Benzopyrans	1-benzopyrans			1.98163	0.412651	2.59782	0.492136			0.804366	-1.9916	2.40617	0.66191
ACNZLRUIGXMARU-SECBINFHSA-N	CC(C)(C)C(N)C(=O)NC1=CC=CC=N1		CC(C)(C)C(N)C(=O)NC1=CC=CC=N1	171764-07-1	2-Amino-3,3-dimethyl-N-(pyridin-2-yl)butanimidic acid	207.277	-38.9732	-15.0008	Organic compounds	Organic acids and derivatives	Carboxylic acids and derivatives	Amino acids, peptides, and analogues			1.50912	0.0446318	2.35975	0.727328			0.754367	-0.441117	2.18193	0.711485
ACOBBFVLNKYODD-CSKARUKUSA-N	CC(C)=CCCC(C)=CC(=O)OC		CC(C)=CCCC(C)=CC(=O)OC	1189-09-9	Methyl (E)-geranate	182.263	120.348	15.3521	Organic compounds	Lipids and lipid-like molecules	Prenol lipids	Monoterpenoids			1.83901	0.79606	2.47145	0.484621			1.57297	0.478033	2.467	0.521512
ACOBBFVLNKYODD-NTMALXAHSA-N	CC(C)=CCCC(C)=CC(=O)OC		CC(C)=CCCC(C)=CC(=O)OC	1862-61-9	2,6-Octadienoic acid, 3,7-dimethyl-, methyl ester, (2Z)-	182.263	120.348	15.3532	Organic compounds	Lipids and lipid-like molecules	Prenol lipids	Monoterpenoids			1.83901	0.79606	2.47145	0.484621			1.57297	0.478033	2.467	0.521512
ACOBBFVLNKYODD-UHFFFAOYSA-N	CC(C)=CCCC(C)=CC(=O)OC		CC(C)=CCCC(C)=CC(=O)OC	NOCAS_47129	Methyl geranate	182.263	120.348	15.3527	Organic compounds	Lipids and lipid-like molecules	Prenol lipids	Monoterpenoids			1.83901	0.79606	2.47145	0.484621			1.57297	0.478033	2.467	0.521512
ACOFACMTVIGUGM-UHFFFAOYSA-N	COC(=O)C(=O)C1C=CC(O)=CC=1		COC(=O)C(=O)C1C=CC(O)=CC=1	38250-16-7	Benzeneacetic acid, 4-hydroxy-.alpha.-oxo-, methyl ester	180.159	-40.7446	-36.1318	Organic compounds	Benzenoids	Benzene and substituted derivatives	Benzoyl derivatives			1.91729	0.708817	2.60481	0.492308			1.72687	0.158059	2.73803	0.509444
ACOHLVVMLNSRSQ-UHFFFAOYSA-N	[O-][N+](=O)C1C=C(C=CC=1)C=CC1C=NN=C2C=CC=CC=12		[O-][N+](=O)C1C=C(C=CC=1)C=CC1C=NN=C2C=CC=CC=12	60246-14-2	Cinnoline, 4-[2-(3-nitrophenyl)ethenyl]-	277.283	-122.672	-1.21795	Organic compounds	Organoheterocyclic compounds	Diazanaphthalenes	Benzodiazines			1.74899	0.129134	2.48287	0.683921			1.03833	-0.444766	2.43523	0.660332
ACOIHAFYVPPSOZ-UHFFFAOYSA-N	CC1C=CC(=CC=1)S(=O)(=O)NC1C=CC(=CC=1)[N+]([O-])=O		CC1C=CC(=CC=1)S(=O)(=O)NC1C=CC(=CC=1)[N+]([O-])=O	734-25-8	Benzenesulfonamide, 4-methyl-N-(4-nitrophenyl)-	292.316	-111.072	-51.4935	Organic compounds	Benzenoids	Benzene and substituted derivatives	Toluenes			1.91806	0.221416	2.55356	0.513514			1.16004	-0.32026	2.44635	0.539743
ACOLQZDYRBEHEV-UHFFFAOYSA-K	[Nd+3].CCCCCCCCCC([O-])=O.CCCCCCCCCC([O-])=O.CCCCCCCCCC([O-])=O	[Nd+3]	CCCCCCCCCC(O)=O	94232-52-7	Neodymium tridecanoate	172.268	94.8259	-53.5143	Organic compounds	Lipids and lipid-like molecules	Fatty Acyls	Fatty acids and conjugates			2.19191	1.33171	2.70432	0			1.87843	0.906988	2.73706	0
ACONNXZOJIHEHN-UHFFFAOYSA-N	CC(=NNC(=O)C1=CC=CC=C1OCC)C(O)=O		CCOC1C=CC=CC=1C(=O)N=NC(C)C(O)=O	20228-27-7	Ruvazone	250.254	-50.136	-3.78474	Organic compounds	Benzenoids	Benzene and substituted derivatives	Benzoic acids and derivatives			1.95109	0.72498	2.71263	0.601415			1.59376	0.124715	2.65943	0.641843
ACOXQYLJOQAHST-ZDUSSCGKSA-N	CC(C)S(=O)(=O)NCC(C)C1C=CC(=CC=1)NC(=O)C1C=C(F)C=C(F)C=1		CC(C)S(=O)(=O)NCC(C)C1C=CC(=CC=1)NC(=O)C1C=C(F)C=C(F)C=1	376594-67-1	LY450108	396.459	-76.4981	-85.2093	Organic compounds	Benzenoids	Benzene and substituted derivatives	Anilides			1.72637	-0.0538193	2.54751	0.73663			1.21836	-0.193349	2.59605	0.739217
ACOZWFISMVUEHN-UHFFFAOYSA-N	CCOC1C=CC(=CC=1)NC(=O)N(C)C		CCOC1C=CC(=CC=1)NC(=O)N(C)C	36503-55-6	["Urea, N'-(4-ethoxyphenyl)-N,N-dimethyl-"]	208.261	-95.3316	-64.9278	Organic compounds	Benzenoids	Benzene and substituted derivatives	N-phenylureas			1.60319	0.368246	2.37543	0.569913			0.98489	-0.271562	2.18647	0.550456
ACPFHRZUWMDZGW-UHFFFAOYSA-N	Cl.CC(CC1C[N+](C)(C)CC1CSCCO)C(=N)[O-]	Cl	CC(CC1C[N+](C)(C)CC1CSCCO)C(=N)[O-]	184007-56-5	3-(4-{[(2-Hydroxyethyl)sulfanyl]methyl}-1,1-dimethylpyrrolidin-1-ium-3-yl)-2-methylpropanimidate--hydrogen chloride (1/1)	274.43	116.288	-111.058	Organic compounds	Lipids and lipid-like molecules	Fatty Acyls	Fatty amides			1.03734	-1.1673	2.45067	0.79814			0.817853	-1.27669	2.38303	0.812226
ACPFLXJEPKOPGF-UHFFFAOYSA-N	CN(C)C(N)=N.OS(O)(=O)=O	OS(=O)(=O)O	CN(C)C(N)=N	1186-46-5	Sulfuric acid--N,N-dimethylguanidine (1/1)	87.126	47.0694	-85.6029	Organic compounds	Organic salts	Organic sulfate salts				1.57062	0.356238	2.3219	0.63693			1.09148	-0.772179	2.22295	0.635391
ACPIRUVYTZVPMV-UHFFFAOYSA-N	Cl.CCC(=O)N(C1CCN(CCC2=CC=CO2)CC1)C1C=CC=CC=1	Cl	CCC(=O)N(C1CCN(CCC2=CC=CO2)CC1)C1C=CC=CC=1	1443-49-8	Furanylethyl fentanyl hydrochloride	326.44	20.5428	73.4563	Organic compounds	Benzenoids	Benzene and substituted derivatives	Anilides			1.49597	0.144476	2.42017	0.7213			0.906446	-0.25767	2.24039	0.723846
ACPKAJPNUOBWGE-UHFFFAOYSA-L	[Na+].[Na+].COC1=CC(=CC=C1N=NC1=CC(=C2C=CC=CC2=C1O)S([O-])(=O)=O)C1C=C(OC)C(=CC=1)N=NC1=CC(=C2C=CC=CC2=C1O)S([O-])(=O)=O	[Na+]	COC1=CC(=CC=C1N=NC1C=C(C2C=CC=CC=2C=1O)S(O)(=O)=O)C1=CC(OC)=C(C=C1)N=NC1C=C(C2C=CC=CC=2C=1O)S(O)(=O)=O	2429-71-2	C.I. Direct Blue 8	714.734	-165.728	-12.7935	Organic compounds	Benzenoids	Benzene and substituted derivatives	Biphenyls and derivatives			2.20469	1.09653	2.80789	0.513493			2.11149	0.95747	2.98167	0.596558
ACPKVLPHIUATOO-UHFFFAOYSA-N	CC1(C)C(OC2=CC=C(O)C=C12)N1CCOCC1		CC1(C)C(OC2=CC=C(O)C=C12)N1CCOCC1	1623-76-3	5-Benzofuranol, 2,3-dihydro-3,3-dimethyl-2-(4-morpholinyl)-	249.31	15.2081	92.5535	Organic compounds	Organoheterocyclic compounds	Coumarans				1.4417	-1.81391	2.39183	0.741169			0.780065	-1.84007	2.25652	0.74107
ACPLMNUIXAQIPP-UHFFFAOYSA-N	CC1(C)CC2C=C(OC)C(=CC=2C(CSC2=CC=CC=C2C(O)=O)=N1)OC		CC1(C)CC2C=C(OC)C(=CC=2C(CSC2=CC=CC=C2C(O)=O)=N1)OC	332358-89-1	2-(6,7-Dimethoxy-3,3-dimethyl-3,4-dihydro-isoquinolin-1-ylmethylsulfanyl)-benzoic acid	385.485	-18.2022	126.714	Organic compounds	Organoheterocyclic compounds	Dihydroisoquinolines				1.03133	-0.398475	2.34084	0.714504			0.718514	-0.94952	2.11942	0.723125
ACPMGBQCNGPAAY-UHFFFAOYSA-N	CC1=CC=C(C=C1)S(=O)(=O)OCC(F)(F)C(F)(F)C(F)(F)C(F)F		CC1=CC=C(C=C1)S(=O)(=O)OCC(F)(F)C(F)(F)C(F)(F)C(F)F	2264-00-8	2,2,3,3,4,4,5,5-Octafluoropentyl 4-methylbenzene-1-sulfonate	386.26	-127.272	-48.6119	Organic compounds	Benzenoids	Benzene and substituted derivatives	Benzenesulfonic acids and derivatives			1.37315	-0.66412	2.44683	0.674697			0.539439	-1.52081	2.22998	0.693033
ACPOUJIDANTYHO-UHFFFAOYSA-N	OC1C2=CC=CC3N=NC(C=32)=C2C=CC=CC2=1		OC1C2=CC=CC3N=NC(C=32)=C2C=CC=CC2=1	129-56-6	Anthra(1,9-cd)pyrazol-6(2H)-one	220.231	-117.497	40.4406	Organic compounds	Benzenoids	Anthracenes				1.59482	0.0269715	2.32656	0.681627			0.920479	-3.40199	2.44464	0.693875
ACPUAKGHNFCYOH-UHFFFAOYSA-N	CCC1C2=CC=CC=C2OC2=CC(=CC=C2C=1C1C=CC=CC=1)OCC(O)CO		CCC1C2=CC=CC=C2OC2=CC(=CC=C2C=1C1C=CC=CC=1)OCC(O)CO	85850-89-1	3-[(10-Ethyl-11-phenyldibenzo[b,f]oxepin-3-yl)oxy]propane-1,2-diol	388.463	-4.48298	-85.4295	Organic compounds	Organoheterocyclic compounds	Benzoxepines	Dibenzoxepines			1.6652	0.224221	2.53069	0.706429			1.04135	-0.721547	2.40348	0.721733
ACPWZKZFDFBALX-UHFFFAOYSA-N	Br.Br.NC1=CC=CC=C1NC(=O)C1C=CC(CNC2N=CC=C(N=2)C2=CC=CN=C2)=CC=1	Br	NC1=CC=CC=C1NC(=O)C1C=CC(CNC2N=CC=C(N=2)C2=CC=CN=C2)=CC=1	944537-89-7	N-(2-Aminophenyl)-4-({[4-(pyridin-3-yl)pyrimidin-2-yl]amino}methyl)benzamide--hydrogen bromide (1/2)	396.454	-60.5216	22.08	Organic compounds	Benzenoids	Benzene and substituted derivatives	Anilides			1.8594	0.292799	2.58194	0.742247			1.45154	-0.167854	2.59115	0.727193
ACPZXXNPYPSAKR-UHFFFAOYSA-N	CCOC(C=CC=CC(OCC)OCC)OCC		CCOC(C=CC=CC(OCC)OCC)OCC	3975-10-8	2,4-Hexadiene, 1,1,6,6-tetraethoxy-	258.358	130.778	-73.3691	Organic compounds	Organic oxygen compounds	Organooxygen compounds	Ethers			1.87733	0.42052	2.6544	0.742746			1.65004	-0.0790921	2.61431	0.760599
ACQBHJXEAYTHCY-UHFFFAOYSA-N	O=C(C1CC1)C1C=CC(=CC=1)OCCCC1=CNC=N1		O=C(C1CC1)C1C=CC(=CC=1)OCCCC1=CNC=N1	184025-18-1	Ciproxifan	270.332	26.7865	-22.4124	Organic compounds	Organic oxygen compounds	Organooxygen compounds	Carbonyl compounds			1.73411	0.117348	2.497	0.730592			1.06301	-0.238084	2.2909	0.737057
ACQDWOKSGJMQEI-UHFFFAOYSA-N	CC(=O)N(O)C1=CC=CC2CC3=CC=CC=C3C1=2		CC(=O)N(O)C1=CC=CC2CC3=CC=CC=C3C1=2	22225-34-9	N-Fluoren-4-ylacetohydroxamic acid	239.274	-30.893	63.5877	Organic compounds	Benzenoids	Fluorenes				1.73143	0.287702	2.44495	0.743605			0.771638	-0.713689	2.19327	0.718525
ACQFOMVLRAEQCK-UHFFFAOYSA-N	CC(=C)C(O)C(=O)OCC		CC(=C)C(O)C(=O)OCC	33537-17-6	3-Butenoic acid, 2-hydroxy-3-methyl-, ethyl ester	144.17	92.1016	-14.5083	Organic compounds	Lipids and lipid-like molecules	Fatty Acyls	Fatty acid esters			1.86698	0.632692	2.51715	0.561948			1.56183	0.38123	2.72825	0.552465
ACQHZORIRZCPLG-UHFFFAOYSA-N	CC(O)CC1COC(CN2C=NC=N2)(O1)C1=CC=C(Cl)C=C1Cl		CC(O)CC1COC(CN2C=NC=N2)(O1)C1=CC=C(Cl)C=C1Cl	NOCAS_891628	3,5-dideoxy-1,2-O-[1-(2,4-dichlorophenyl)-2-(1H-1,2,4-triazol-1-yl)ethylidene]pentitol	358.225	-16.5422	-16.1676	Organic compounds	Benzenoids	Benzene and substituted derivatives	Halobenzenes			0.760025	-0.757169	2.28834	0.405317			0.643367	-0.458879	2.25537	0.46129
ACQRIFFFFMCDGX-UHFFFAOYSA-N	O=C(OCCOC(=O)C(Br)Br)C(Br)Br		O=C(OCCOC(=O)C(Br)Br)C(Br)Br	94159-38-3	Ethylene bis(dibromoacetate)	461.726	125.106	-13.3772	Organic compounds	Organic acids and derivatives	Carboxylic acids and derivatives	Dicarboxylic acids and derivatives			1.51266	-0.646095	2.7064	0.637708			1.03303	-1.05029	2.44434	0.659068
ACQUZQLFHIERSQ-UHFFFAOYSA-N	[Ti+4].CC(C)[O-].CC(C)[O-].CC(C)O.CC(C)O.CCCCCCCCCCCCCOP([O-])OCCCCCCCCCCCCC.CCCCCCCCCCCCCOP([O-])OCCCCCCCCCCCCC	CC([O-])C.CC(O)C.[Ti+4]	CCCCCCCCCCCCCOP(O)OCCCCCCCCCCCCC	65460-51-7	Titanium(4+) bis(tridecyloxy)phosphanolate propan-2-olate--propan-2-ol (1/2/2/2)	446.697	112.365	-60.7327	Organic compounds	Organic oxygen compounds	Organic oxoanionic compounds	Organic phosphites			2.11934	0.841303	2.83232	0.499111			1.7818	0.40164	2.77768	0.535683
ACQXHCHKMFYDPM-UHFFFAOYSA-N	CC1=CC=C(C(O)=O)C(Cl)=N1		CC1=CC=C(C(O)=O)C(Cl)=N1	30529-70-5	2-Chloro-6-methylnicotinic acid	171.583	-60.3668	1.87545	Organic compounds	Organoheterocyclic compounds	Pyridines and derivatives	Pyridinecarboxylic acids and derivatives			1.44435	0.0378132	2.56703	0.647834			1.14313	-0.322496	2.19246	0.649311
ACQZKAMBZDAMRZ-UHFFFAOYSA-N	C1CC1C1NC2=CC=CC=C2N=1		C1CC1C1NC2=CC=CC=C2N=1	16405-79-1	2-cyclopropyl-1H-benzimidazole	158.204	-104.91	74.7185	Organic compounds	Organoheterocyclic compounds	Benzimidazoles				1.34433	-0.768859	2.17808	0.639549			0.881194	-0.581956	2.06206	0.673765
ACQZVWGQFXXTIX-UHFFFAOYSA-M	[Br-].CC[N+]1(C)CCOCC1	[Br-]	CC[N+]1(C)CCOCC1	65756-41-4	Morpholinium, 4-ethyl-4-methyl-, bromide (1:1)	130.211	59.3927	-25.7433	Organic compounds	Organoheterocyclic compounds	Oxazinanes	Morpholines			1.68096	0.616616	2.38436	0.698626		0.980348	1.29918	-0.777823	2.40298	0.715613
ACRCGKKNPOZIPG-UHFFFAOYSA-N	CP1(=O)OCC2(COP(C)(=O)OC2)CO1		CP1(=O)OCC2(COP(C)(=O)OC2)CO1	3001-98-7	2,4,8,10-Tetraoxa-3,9-diphosphaspiro[5.5]undecane, 3,9-dimethyl-, 3,9-dioxide	256.131	137.732	53.6015	Organic compounds	Organic acids and derivatives	Organic phosphonic acids and derivatives	Phosphonic acid diesters	2.4113	2.4113	1.57551	-1.14147	2.45237	0.659089			0.921143	-1.76601	2.32442	0.833608
ACRDFOPYQAGNPS-UHFFFAOYSA-N	CC(=O)OC1CC(C)CCC=1C(C)C		CC(=O)OC1CC(C)CCC=1C(C)C	20144-45-0	5-Methyl-2-(propan-2-yl)cyclohex-1-en-1-yl acetate	196.29	84.9827	68.6497	Organic compounds	Lipids and lipid-like molecules	Prenol lipids	Monoterpenoids			1.81584	0.646455	2.49001	0.722726			1.29642	-0.132276	2.23951	0.663224
ACRHBAYQBXXRTO-NRFANRHFSA-N	CN(CCCN1CCC2C=C(OC)C(=CC=2CC1=O)OC)CC1CC2=CC(OC)=C(C=C21)OC		CN(CCCN1CCC2C=C(OC)C(=CC=2CC1=O)OC)CC1CC2=CC(OC)=C(C=C21)OC	167072-91-5	S 16260-2	468.594	-19.7534	131.58	Organic compounds	Organoheterocyclic compounds	Benzazepines				1.6284	-0.313641	2.60016	0.775959			0.870074	-0.610605	2.36178	0.779395
ACRHBAYQBXXRTO-OAQYLSRUSA-N	CN(CCCN1CCC2C=C(OC)C(=CC=2CC1=O)OC)CC1CC2=CC(OC)=C(C=C21)OC		CN(CCCN1CCC2C=C(OC)C(=CC=2CC1=O)OC)CC1CC2=CC(OC)=C(C=C21)OC	155974-00-8	Ivabradine	468.594	-19.7535	131.574	Organic compounds	Organoheterocyclic compounds	Benzazepines				1.6284	-0.313641	2.60016	0.775959			0.870074	-0.610605	2.36178	0.779395
ACRITBNCBMTINK-UHFFFAOYSA-N	COC1=CC(CC(C)N)=C(C=C1Cl)OC		COC1=CC(CC(C)N)=C(C=C1Cl)OC	123431-31-2	2,5-Dimethoxy-4-chloroamphetamine	229.707	-32.1654	108.163	Organic compounds	Benzenoids	Benzene and substituted derivatives	Phenethylamines			1.0514	-0.552583	3.4438	0.679449			0.772574	-0.476832	2.06431	0.659909
ACRKBKUODJDYBV-UHFFFAOYSA-N	O=C(NC1C(Cl)=C(Cl)C(Cl)=C(Cl)C=1Cl)C1SC(Cl)=NC=1C(F)(F)F		O=C(NC1C(Cl)=C(Cl)C(Cl)=C(Cl)C=1Cl)C1SC(Cl)=NC=1C(F)(F)F	133860-98-7	5-Thiazolecarboxamide, 2-chloro-N-(pentachlorophenyl)-4-(trifluoromethyl)-	478.921	-77.8378	-42.3313	Organic compounds	Benzenoids	Benzene and substituted derivatives	Anilides			1.22028	-0.855053	2.70719	0.758443			0.0484857	-4.68403	2.17341	0.767632
ACRMAHMDLNNSNK-UHFFFAOYSA-N	CC(C(O)=O)C1C=CC(=CC=1)N1C(=O)C2=CC=CC=C2C1=O		CC(C(O)=O)C1C=CC(=CC=1)N1C(=O)C2=CC=CC=C2C1=O	59430-61-4	2-[4-(1,3-Dioxo-1,3-dihydro-2H-isoindol-2-yl)phenyl]propanoic acid	295.294	-42.6064	52.3318	Organic compounds	Organoheterocyclic compounds	Isoindoles and derivatives	Isoindolines			1.91191	0.288166	2.62374	0.64771			1.49186	-0.236381	2.64599	0.687846
ACRMUSVWIFZVSM-JTHHODAVSA-N	CC(CN1CCOCC1)C(C1C=CC=CC=1)(C1C=CC=CC=1)C(=O)N1CCCC1.OC(=O)C(O)C(O)C(O)=O	OC(C(C(C(=O)O)O)O)=O	CC(CN1CCOCC1)C(C(=O)N1CCCC1)(C1C=CC=CC=1)C1C=CC=CC=1	2922-44-3	Dextromoramide tartrate	392.543	19.2552	48.0672	Organic compounds	Benzenoids	Benzene and substituted derivatives	Diphenylmethanes			1.40847	-0.0197625	2.41494	0.712121			0.948668	-0.247209	2.36718	0.729548
ACRNCNWXWBBKGP-BQYQJAHWSA-N	CCCCC=CCOC(=O)CC(C)C		CCCCC=CCOC(=O)CC(C)C	94109-97-4	Butanoic acid, 3-methyl-, 2-heptenyl ester, (E)-	198.306	118.239	-4.83046	Organic compounds	Lipids and lipid-like molecules	Fatty Acyls	Fatty acid esters			2.10172	1.23128	2.69426	0.555438			1.71309	0.810686	2.48065	0.572201
ACRNCNWXWBBKGP-UHFFFAOYSA-N	CCCCC=CCOC(=O)CC(C)C		CCCCC=CCOC(=O)CC(C)C	253596-70-2	Hept-2-enyl isovalerate	198.306	118.24	-4.83046	Organic compounds	Lipids and lipid-like molecules	Fatty Acyls	Fatty acid esters			2.10172	1.23128	2.69426	0.555438			1.71309	0.810686	2.48065	0.572201
ACRQLFSHISNWRY-UHFFFAOYSA-N	BrC1=C(OC2C=CC=CC=2)C(Br)=C(Br)C(Br)=C1Br		BrC1=C(OC2C=CC=CC=2)C(Br)=C(Br)C(Br)=C1Br	189084-65-9	1,2,3,4,5-Pentabromo-6-phenoxybenzene	564.691	-131.492	-96.674	Organic compounds	Benzenoids	Benzene and substituted derivatives	Diphenylethers			-0.0754673	-1.023	2.30906	0.58022			0.0289672	-4.08103	2.16156	0.56293
ACRSFVDYBBDIBA-UHFFFAOYSA-N	CC1=C(NC2=CC=CC=C21)C(F)(F)C(F)(F)C(F)(F)C(F)(F)F		CC1=C(NC2=CC=CC=C21)C(F)(F)C(F)(F)C(F)(F)C(F)(F)F	1622133-36-1	3-Methyl-2-(nonafluorobutyl)-1H-indole	349.196	-24.9931	-124.176	Organic compounds	Organoheterocyclic compounds	Indoles and derivatives	Indoles			1.17091	-0.695609	2.3737	0.759693			0.811554	-1.42556	1.91139	0.724432
ACRWYXSKEHUQDB-UHFFFAOYSA-N	N#CCCC1C=CC=CC=1		N#CCCC1C=CC=CC=1	645-59-0	Benzenepropanenitrile	131.178	-42.0676	-71.9832	Organic compounds	Benzenoids	Benzene and substituted derivatives				1.46564	0.438751	2.15631	0.57905			0.673422	-0.566618	1.86023	0.614523
ACRXLLXANWELLX-UHFFFAOYSA-N	OC(Br)(Br)Br		OC(Br)(Br)Br	5405-30-1	Tribromomethanol	268.73	33.027	-136.054	Organic compounds	Organohalogen compounds	Alkyl halides	Halomethanes			1.25022	-0.919752	2.47736	0.754406			0.9412	-0.839074	2.82845	0.754406
ACRYEKZMMBMNGC-UHFFFAOYSA-N	CCOCCOCCOC(=O)COC1=CC=C(Cl)C=C1Cl		CCOCCOCCOC(=O)COC1=CC=C(Cl)C=C1Cl	53404-36-7	2-(2-Ethoxyethoxy)ethyl (2,4-dichlorophenoxy)acetate	337.199	-52.0469	-110.75	Organic compounds	Benzenoids	Benzene and substituted derivatives	Phenoxyacetic acid derivatives			1.30617	-0.386077	2.27037	0.395218			0.807254	-0.78513	2.18118	0.532259
ACSBMCAYILYABW-UHFFFAOYSA-N	O=C1CC(O1)(C(F)(F)F)C(F)(F)F		O=C1CC(O1)(C(F)(F)F)C(F)(F)F	1718-33-8	2-Oxetanone, 4,4-bis(trifluoromethyl)-	208.057	72.9186	77.5623	Organic compounds	Organoheterocyclic compounds	Lactones	Beta propiolactones			1.31084	-0.938458	2.42478	0.778683			0.72975	-1.64734	2.18299	0.785448
ACSFOIGNUQUIGE-AIPUTVCKSA-N	CC12CCC(=O)CC1CCC1C2C(O)CC2(C)C1CCC2(O)C(=O)CO		CC12CCC(=O)CC1CCC1C2C(O)CC2(C)C1CCC2(O)C(=O)CO	1482-50-4	Dihydrocortisol	364.482	104.673	113.794	Organic compounds	Lipids and lipid-like molecules	Steroids and steroid derivatives	Hydroxysteroids			1.76809	-2.51755	2.59926	0.639683			0.765117	-2.91375	2.53126	0.748268
ACSFOIGNUQUIGE-SERXDUEGSA-N	CC12CCC(=O)CC1CCC1C2C(O)CC2(C)C1CCC2(O)C(=O)CO		CC12CCC(=O)CC1CCC1C2C(O)CC2(C)C1CCC2(O)C(=O)CO	516-41-6	5alpha-Dihydrocortisol	364.482	104.676	113.791	Organic compounds	Lipids and lipid-like molecules	Steroids and steroid derivatives	Hydroxysteroids			1.76809	-2.51755	2.59926	0.639683			0.765117	-2.91375	2.53126	0.748268
ACSFRJMUABMPHG-UHFFFAOYSA-N	CC(=O)C(Cl)(Cl)C(=O)OC		CC(=O)C(Cl)(Cl)C(=O)OC	6134-69-6	Methyl 2,2-dichloroacetoacetate	185.006	61.762	-112.849	Organic compounds	Organic acids and derivatives	Keto acids and derivatives	Beta-keto acids and derivatives			1.24425	-0.58256	2.5671	0.682538			0.961022	-0.600875	2.258	0.688235
ACSIXWWBWUQEHA-UHFFFAOYSA-N	OP(O)(=O)C(Cl)(Cl)P(O)(O)=O		OP(O)(=O)C(Cl)(Cl)P(O)(O)=O	10596-23-3	Clodronic acid	244.891	59.2299	-134.251	Organic compounds	Organic acids and derivatives	Organic phosphonic acids and derivatives	Bisphosphonates			1.63568	-1.15181	2.50266	0.677574			0.661602	-1.84412	2.33421	0.672036
ACSJOJBMNBXQTG-UHFFFAOYSA-N	CCCCC(CNS(=O)(=O)C1C=CC=CC=1)CC		CCCCC(CNS(=O)(=O)C1C=CC=CC=1)CC	36997-29-2	N-(2-Ethylhexyl)benzenesulfonamide	269.41	-117.14	-57.5965	Organic compounds	Benzenoids	Benzene and substituted derivatives	Benzenesulfonamides			1.43326	-0.157592	2.32842	0.534391			1.23228	-0.322315	2.32689	0.597461
ACSQLTBPYZSGBA-GMXVVIOVSA-N	CC(C)(C)C(CO)NC(=O)C1=NN(C2C3CC3CC=21)C1=C[N+]([O-])=CC=N1		CC(C)(C)C(CO)NC(=O)C1=NN(C2C3CC3CC=21)C1=C[N+]([O-])=CC=N1	1268881-20-4	Olorinab	357.414	-59.1384	83.2233	Organic compounds	Organic acids and derivatives	Carboxylic acids and derivatives	Carboxylic acid derivatives			1.73889	-0.931729	2.58984	0.80938			0.895946	-2.64714	2.46604	0.809127
ACSROKXFXFNERX-UHFFFAOYSA-N	CC(C)N(CCNC(=O)CN1CCCC1=O)C(C)C.OS(O)(=O)=O	OS(=O)(=O)O	CC(C)N(CCNC(=O)CN1CCCC1=O)C(C)C	72869-16-0	Pramiracetam sulfate	269.389	47.5265	31.0925	Organic compounds	Organic acids and derivatives	Carboxylic acids and derivatives	Amino acids, peptides, and analogues			1.82567	0.319906	2.50631	0.629039			1.08226	-0.333027	2.35159	0.694891
ACSYUJZPWRUVEE-UHFFFAOYSA-N	NC1=NC2=CC=C(C=C2S1)OCC(F)(F)C(F)F		NC1=NC2=CC=C(C=C2S1)OCC(F)(F)C(F)F	1855907-41-3	6-(2,2,3,3-Tetrafluoropropoxy)-1,3-benzothiazol-2-amine	280.246	-85.7621	24.8422	Organic compounds	Organoheterocyclic compounds	Benzothiazoles				0.991143	-0.711156	2.40941	0.788248			0.630435	-2.78264	2.17521	0.783474
ACTAPAGNZPZLEF-UHFFFAOYSA-N	CCC[Si](Cl)(CCC)CCC		CCC[Si](Cl)(CCC)CCC	995-25-5	Silane, chlorotripropyl-	192.806	85.492	-98.4694	Organic compounds	Organometallic compounds	Organometalloid compounds	Organosilicon compounds			1.28305	-0.64721	2.43973	0.672647			1.2267	-1.00918	2.69267	0.683889
ACTCCLFXGJCHSZ-UHFFFAOYSA-N	CCCCCCCCCCCCOCCOCCOCCOCCOCC(O)=O		CCCCCCCCCCCCOCCOCCOCCOCCOCC(O)=O	21127-45-7	3,6,9,12,15-Pentaoxaheptacosanoicacid	420.587	104.694	-64.7338	Organic compounds	Organic acids and derivatives	Carboxylic acids and derivatives	Carboxylic acids			2.27123	1.00503	2.93545	0.458036			2.23307	-0.15294	3.31472	0.486131
ACTIUHUUMQJHFO-UPTCCGCDSA-N	CC(C)=CCCC(C)=CCCC(C)=CCCC(C)=CCCC(C)=CCCC(C)=CCCC(C)=CCCC(C)=CCCC(C)=CCC=C(C)C=CC1C(O)=C(OC)C(OC)=C(O)C=1C		CC(C)=CCCC(C)=CCCC(C)=CCCC(C)=CCCC(C)=CCCC(C)=CCCC(C)=CCCC(C)=CCCC(C)=CCC=C(C)C=CC1C(O)=C(OC)C(OC)=C(O)C=1C	303-98-0	Ubidecarenone	863.365	123.548	18.7227	Organic compounds	Lipids and lipid-like molecules	Prenol lipids	Quinone and hydroquinone lipids			2.0089	-0.0340445	2.81701	0.658194			1.72419	-1.37971	2.93072	0.662361
ACTOXUHEUCPTEW-BWHGAVFKSA-N	COC1C(OC2OC(C)C(OC3CC(C)(O)C(O)C(C)O3)C(C2O)N(C)C)C(CC=O)CC(C)C(C=CC=CCC(C)OC(=O)CC1O)OC1CCC(C(C)O1)N(C)C		COC1C(OC2OC(C)C(OC3CC(C)(O)C(O)C(C)O3)C(C2O)N(C)C)C(CC=O)CC(C)C(C=CC=CCC(C)OC(=O)CC1O)OC1CCC(C(C)O1)N(C)C	24916-50-5	Spiramycin I	843.065	73.7355	126.615	Organic compounds	Organic oxygen compounds	Organooxygen compounds	Carbohydrates and carbohydrate conjugates			2.02101	-0.359167	2.96013	0.741292			1.39852	-0.795947	3.45586	0.708092
ACTRLDZRLKIJEH-FXOMATFNSA-N	CC1(C)C2CC(OC(=O)C=CC3=CC=CC=C3)C1(C)CC2		CC1(C)C2CC(OC(=O)C=CC3=CC=CC=C3)C1(C)CC2	6330-67-2	Bornyl cinnamate	284.399	115.007	86.2293	Organic compounds	Phenylpropanoids and polyketides	Cinnamic acids and derivatives	Cinnamic acid esters			1.55101	-0.177529	2.49881	0.545687			0.809831	-0.817329	2.13353	0.519529
ACTRVOBWPAIOHC-JCYAYHJZSA-N	OC(=O)C(S)C(S)C(O)=O		OC(=O)C(S)C(S)C(O)=O	27887-84-9	(2R,3R)-2,3-Dimercaptosuccinic acid	182.222	53.8008	-70.3445	Organic compounds	Lipids and lipid-like molecules	Fatty Acyls	Fatty acids and conjugates			1.35209	-0.266461	2.57985	0.562031			0.803359	-0.685695	2.20959	0.579286
ACTRVOBWPAIOHC-LWMBPPNESA-N	OC(=O)C(S)C(S)C(O)=O		OC(=O)C(S)C(S)C(O)=O	10008-75-0	DL-Dimercaptosuccinic acid	182.222	53.8013	-70.3443	Organic compounds	Lipids and lipid-like molecules	Fatty Acyls	Fatty acids and conjugates			1.35209	-0.266461	2.57985	0.562031			0.803359	-0.685695	2.20959	0.579286
ACTRVOBWPAIOHC-UHFFFAOYSA-N	OC(=O)C(S)C(S)C(O)=O		OC(=O)C(S)C(S)C(O)=O	2418-14-6	2,3-Dimercaptobutanedioic acid	182.222	53.8008	-70.3451	Organic compounds	Lipids and lipid-like molecules	Fatty Acyls	Fatty acids and conjugates			1.35209	-0.266461	2.57985	0.562031			0.803359	-0.685695	2.20959	0.579286
ACTRVOBWPAIOHC-XIXRPRMCSA-N	OC(=O)C(S)C(S)C(O)=O		OC(=O)C(S)C(S)C(O)=O	304-55-2	Succimer	182.222	53.8004	-70.3438	Organic compounds	Lipids and lipid-like molecules	Fatty Acyls	Fatty acids and conjugates			1.35209	-0.266461	2.57985	0.562031			0.803359	-0.685695	2.20959	0.579286
ACUGRDGEWGHXLZ-UHFFFAOYSA-N	CCCCC1(C)CC1CCC		CCCCC1(C)CC1CCC	41977-34-8	cyclopropane, 1-butyl-1-methyl-2-propyl-	154.297	126.325	37.731	Organic compounds	Hydrocarbons	Saturated hydrocarbons	Cycloalkanes			1.96489	0.599626	2.54064	0.725418			0.981055	-0.521932	2.10992	0.745652
ACUPDOXCXXCPIX-UHFFFAOYSA-N	CNC(=O)C(C#N)=c1[nH]c(=C2C(=O)NC(=O)NC2=O)c2ccccc21		CNC(=O)C(C#N)=c1[nH]c(=C2C(=O)NC(=O)NC2=O)c2ccccc21	76199-85-4	Pigment yellow 185	337.295	-101.172	82.7801	Organic compounds	Organoheterocyclic compounds	Isoindoles and derivatives	Isoindoles	2.28058	2.28058	2.18159	0.916056	2.84721	0.552069		2.08241	1.39165	-0.159001	2.74335	0.767128
ACUPDXXDRCXYOM-UHFFFAOYSA-M	[Na+].CC1=CC=C(C(C)=C1NC1=CC(=C(N)C2=C1C(=O)C1=CC=CC=C1C2=O)S([O-])(=O)=O)S(=O)(=O)NS(=O)(=O)C1=CC2=NC(Cl)=C(Cl)N=C2C=C1	[Na+]	CC1C=CC(=C(C)C=1NC1C=C(C(N)=C2C=1C(=O)C1C=CC=CC=1C2=O)S(O)(=O)=O)S(=O)(=O)NS(=O)(=O)C1=CC2N=C(Cl)C(Cl)=NC=2C=C1	97375-13-8	Sodium 1-amino-4-(3-(((2,3-dichloro-6-quinoxalinyl)sulphonyl)sulphamoyl)-2,6-dimethylphenyl)amino-9,10-dihydro-9,10-dioxoanthracene-2-sulphonate	762.631	-145.22	67.9656	Organic compounds	Benzenoids	Anthracenes	Anthraquinones			2.25517	-2.06589	2.83902	0.50724			1.60642	-2.89794	2.69848	0.731095
ACUZDYFTRHEKOS-UHFFFAOYSA-N	CCCCCCCCC(C)O		CCCCCCCCC(C)O	1120-06-5	Decan-2-ol	158.285	131.425	-97.0046	Organic compounds	Lipids and lipid-like molecules	Fatty Acyls	Fatty alcohols			2.2353	1.43696	2.71159	0.434275			1.94305	0.913903	2.69416	0.458721
ACVAPXTZJANMHB-UHFFFAOYSA-N	CCOC(=O)C(NC1C=C2C=CC=CC2=CC=1)C(=O)OCC		CCOC(=O)C(NC1C=C2C=CC=CC2=CC=1)C(=O)OCC	6248-33-5	diethyl 2-(2-naphthylamino)malonate	301.342	-94.5712	-51.8506	Organic compounds	Organic acids and derivatives	Carboxylic acids and derivatives	Amino acids, peptides, and analogues			1.83489	0.608599	2.58231	0.617046			1.5027	-0.108525	2.72408	0.616134
ACVCIJWFRHNPBF-UHFFFAOYSA-N	OC(=O)CCCCC(=O)OCC1CO1		OC(=O)CCCCC(=O)OCC1CO1	90604-97-0	6-[(Oxiran-2-yl)methoxy]-6-oxohexanoic acid	202.206	140.227	31.831	Organic compounds	Lipids and lipid-like molecules	Fatty Acyls	Fatty acid esters			2.11411	1.0482	2.71413	0.599889			2.15032	0.351888	3.03839	0.603734
ACVDLWXRXPUURG-UHFFFAOYSA-N	CC1COCCOC(C)(CC2C=CC=CC=2)O1		CC1COCCOC(C)(CC2C=CC=CC=2)O1	94031-10-4	2-Benzyl-2,4-dimethyl-1,3,6-trioxocane	236.311	40.6844	71.2881	Organic compounds	Organic oxygen compounds	Organooxygen compounds	Ethers			1.55806	0.137882	2.43246	0.752486			1.1726	-0.344695	2.34747	0.750919
ACVFJYKNBOHIMH-DPFKZJTMSA-N	Cl.OC1=C2C3CC(CC3)C2=C(O)N1CCCCN1CCN(CC1)C1N=CC=CN=1	Cl	OC1=C2C3CC(CC3)C2=C(O)N1CCCCN1CCN(CC1)C1N=CC=CN=1	99095-10-0	Tandospirone hydrochloride	383.496	-4.63365	71.5563	Organic compounds	Organoheterocyclic compounds	Diazinanes	Piperazines			1.39892	-3.08867	2.45362	0.762989			0.798421	-0.902229	2.39713	0.780626
ACVGNKYJVGNLIL-UHFFFAOYSA-N	COC1C=CC(=CC=1)c1ccc(=N)[n](CCCC(O)=O)[n]1		COC1C=CC(=CC=1)c1ccc(=N)[n](CCCC(O)=O)[n]1	105538-73-6	6-Imino-3-(4-methoxyphenyl)-1(6H)-pyridazinebutanoic acid	287.319	-16.1092	2.48235	Organic compounds	Organoheterocyclic compounds	Diazines	Pyridazines and derivatives			1.85351	0.252833	2.57564	0.699767			1.14201	-0.286237	2.7046	0.724359
ACVGWSKVRYFWRP-UHFFFAOYSA-N	O=c1c2ccccc2[n]c2C3NC4=CC=CC=C4C=3CC[n]21		O=c1c2ccccc2[n]c2C3NC4=CC=CC=C4C=3CC[n]21	84-26-4	["8,13-dihydro-Indolo(2',3':3,4)pyrido(2,1-b)quinazolin-5(7H)-one"]	287.322	-79.5946	63.3271	Organic compounds	Organoheterocyclic compounds	Indoles and derivatives	Pyridoindoles			1.81239	-0.2142	2.50731	0.724767			1.05853	-0.623935	2.33941	0.719624
ACVHLWLOORYJEE-UHFFFAOYSA-N	CC(C)COC(=O)C1=CC=CC=C1C(=O)OC1CCCCC1		CC(C)COC(=O)C1=CC=CC=C1C(=O)OC1CCCCC1	5334-09-8	Cyclohexyl 2-isobutyl phthalate	304.386	27.7831	35.3696	Organic compounds	Benzenoids	Benzene and substituted derivatives	Benzoic acids and derivatives			1.54738	0.415934	2.39433	0.452987			1.20352	-0.169609	2.3456	0.456717
ACVXWOLXADMINA-UHFFFAOYSA-N	CCOC1=NC(=NS1)C(O)=O		CCOC1=NC(=NS1)C(O)=O	67472-43-9	5-Ethoxy-1,2,4-thiadiazole-3-carboxylic acid	174.181	-12.0956	-24.5955	Organic compounds	Organic oxygen compounds	Organooxygen compounds	Ethers			1.3433	-0.511209	2.56503	0.674048			0.764056	-1.06225	2.19546	0.689464
ACWASDPGAVYCNI-JKUQZMGJSA-N	CSCC(=O)C(O)C(O)CO		CSCC(=O)C(O)C(O)CO	23656-67-9	5-Methylthioribose	180.225	52.011	-99.3784	Organic compounds	Organic oxygen compounds	Organooxygen compounds	Carbohydrates and carbohydrate conjugates			1.13701	-0.606455	2.27231	0.706441			1.11628	-0.523603	2.64447	0.728924
ACWBBAGYTKWBCD-ZETCQYMHSA-N	NC(CC1C=C(Cl)C(O)=CC=1)C(O)=O		NC(CC1C=C(Cl)C(O)=CC=1)C(O)=O	7423-93-0	3-Chloro-L-tyrosine	215.636	15.7285	-56.3185	Organic compounds	Organic acids and derivatives	Carboxylic acids and derivatives	Amino acids, peptides, and analogues			1.49106	0.129225	2.49587	0.67759			1.17127	-0.270064	2.3823	0.651928
ACWBQPMHZXGDFX-QFIPXVFZSA-N	CC(C)C(C(O)=O)N(CC1C=CC(=CC=1)C1=CC=CC=C1C1=NNN=N1)C(=O)CCCC		CC(C)C(C(O)=O)N(CC1C=CC(=CC=1)C1=CC=CC=C1C1=NNN=N1)C(=O)CCCC	137862-53-4	Valsartan	435.528	-29.7051	36.6343	Organic compounds	Organic acids and derivatives	Carboxylic acids and derivatives	Amino acids, peptides, and analogues			1.9013	0.0908535	2.5881	0.754361			1.21971	-0.129435	2.63459	0.712857
ACWBQPMHZXGDFX-UHFFFAOYSA-N	CC(C)C(C(O)=O)N(CC1C=CC(=CC=1)C1=CC=CC=C1C1=NNN=N1)C(=O)CCCC		CC(C)C(C(O)=O)N(CC1C=CC(=CC=1)C1=CC=CC=C1C1=NNN=N1)C(=O)CCCC	943333-68-4	N-(1-Oxopentyl)-N-[[2â€²-(2H-tetrazol-5-yl)[1,1â€²-biphenyl]-4-yl]methyl]valine	435.528	-29.7044	36.6344	Organic compounds	Organic acids and derivatives	Carboxylic acids and derivatives	Amino acids, peptides, and analogues			1.9013	0.0908535	2.5881	0.754361			1.21971	-0.129435	2.63459	0.712857
ACWCANXGLNLMJB-UHFFFAOYSA-N	CC=CN1C=NC2=C(N)N=CN=C12		CC=CN1C=NC2=C(N)N=CN=C12	4121-40-8	9-(1-Propen-1-yl)-9H-purin-6-amine	175.195	24.028	124.103	Organic compounds	Organoheterocyclic compounds	Imidazopyrimidines	Purines and purine derivatives			1.39473	-0.0757728	2.305	0.81885			0.987123	-0.518239	2.20774	0.821846
ACWJDDIKDCUGLO-UHFFFAOYSA-M	[O-]C(=O)C(F)(F)C(F)(F)C(F)(F)C(F)(F)C(F)(F)C(F)(F)C(F)(F)C(F)(F)C(F)(F)C(F)(F)Cl		OC(=O)C(F)(F)C(F)(F)C(F)(F)C(F)(F)C(F)(F)C(F)(F)C(F)(F)C(F)(F)C(F)(F)C(F)(F)Cl	1696260-07-7	11-Chloro-perfluoroundecanoate	580.54	5.47899	-132.064	Organic compounds	Lipids and lipid-like molecules	Fatty Acyls	Fatty acids and conjugates			1.02099	-0.869593	2.92008	0.44			0.402309	-1.46548	2.41332	0.459048
ACWJDDIKDCUGLO-UHFFFAOYSA-N	OC(=O)C(F)(F)C(F)(F)C(F)(F)C(F)(F)C(F)(F)C(F)(F)C(F)(F)C(F)(F)C(F)(F)C(F)(F)Cl		OC(=O)C(F)(F)C(F)(F)C(F)(F)C(F)(F)C(F)(F)C(F)(F)C(F)(F)C(F)(F)C(F)(F)C(F)(F)Cl	2823-49-6	11-Chloro-Perfluoroundecanoic acid	580.54	7.84509	-134.764	Organic compounds	Lipids and lipid-like molecules	Fatty Acyls	Fatty acids and conjugates			1.02099	-0.869593	2.92008	0.44			0.402309	-1.46548	2.41332	0.459048
ACWQBUSCFPJUPN-HWKANZROSA-N	CC=C(C)C=O		CC=C(C)C=O	497-03-0	E-2-Methyl-2-butenal	84.118	90.6648	-75.4871	Organic compounds	Organic oxygen compounds	Organooxygen compounds	Carbonyl compounds			1.55035	0.242445	2.30822	0.690542			1.26015	-0.262964	2.43567	0.718761
ACWQBUSCFPJUPN-UHFFFAOYSA-N	CC=C(C)C=O		CC=C(C)C=O	1115-11-3	2-Methylbut-2-enal	84.118	90.6646	-75.487	Organic compounds	Organic oxygen compounds	Organooxygen compounds	Carbonyl compounds			1.55035	0.242445	2.30822	0.690542			1.26015	-0.262964	2.43567	0.718761
ACWZISJYAYAEPT-UHFFFAOYSA-N	CC1CN1C(=O)CCCCCCCC(=O)N1CC1C		CC1CN1C(=O)CCCCCCCC(=O)N1CC1C	72797-24-1	["Aziridine, 1,1'-(1,9-dioxo-1,9-nonanediyl)bis[2-methyl-"]	266.385	66.5736	33.9099	Organic compounds	Organic acids and derivatives	Carboxylic acids and derivatives	Carboxylic acid derivatives			1.80736	0.314038	2.51834	0.634259			1.01534	-0.335189	2.32035	0.669063
ACWZRVQXLIRSDF-UHFFFAOYSA-N	CN1C=NC2=C(F)C(NC3=CC=C(Br)C=C3F)=C(C=C12)C(=O)NOCCO		CN1C=NC2=C(F)C(NC3=CC=C(Br)C=C3F)=C(C=C12)C(=O)NOCCO	606143-89-9	MEK-162	441.232	-81.7553	63.1349	Organic compounds	Benzenoids	Benzene and substituted derivatives	Benzoic acids and derivatives			1.5543	-1.6542	2.61348	0.76772			0.905767	-0.823895	2.4225	0.780661
ACXJMLVADDDJON-UHFFFAOYSA-H	[Na+].[Na+].[Na+].[Na+].[Cu+2].COC1C(=CC(=CC=1N=NC1C=C([O-])C(=CC=1)N=NC1=C(C=C2C=C(C=C(C2=C1[O-])S([O-])(=O)=O)S([O-])(=O)=O)S([O-])(=O)=O)NC1N=C(F)N=C(F)C=1Cl)S([O-])(=O)=O	[Na+].[Cu+2]	COC1C(=CC(=CC=1N=NC1=CC(O)=C(C=C1)N=NC1C(=CC2C=C(C=C(C=2C=1O)S(O)(=O)=O)S(O)(=O)=O)S(O)(=O)=O)NC1N=C(F)N=C(F)C=1Cl)S(O)(=O)=O	68239-54-3	Cuprate(4-), [7-[2-[4-[2-[5-[(5-chloro-2,6-difluoro-4-pyrimidinyl)amino]-2-methoxy-3-sulfophenyl]diazenyl]-2-(hydroxy-.kappa.O)phenyl]diazenyl-.kappa.N1]-8-(hydroxy-.kappa.O)-1,3,6-naphthalenetrisulfonato(6-)]-, sodium (1:4)	882.192	-179.224	-6.90858	Organic compounds	Benzenoids	Naphthalenes	Naphthalene sulfonic acids and derivatives			2.27963	1.04555	2.7666	0.550159			1.86718	-1.1516	2.90426	0.641381
ACXJWHRFZUSCNC-NUSNDSRSSA-N	CC12CCC(O)CC1CC1OC31C2C(=O)C(O)C1(C)C(CCC13O)C1COC(=O)C=1		CC12CCC(O)CC1CC1OC31C2C(=O)C(O)C1(C)C(CCC13O)C1COC(=O)C=1	22146-03-8	3,11,14-Trihydroxy-12-oxo-7,8-epoxycard-20(22)-enolide	418.486	86.4139	123.508	Organic compounds	Lipids and lipid-like molecules	Steroids and steroid derivatives	Steroid lactones			1.85397	-2.19525	2.74225	0.817264			0.736664	-2.24833	2.55158	0.819621
ACXNMSHTEIVGRM-UHFFFAOYSA-L	[Na+].[K+].[O-]S(=O)(=O)C1=CC(=CC=C1C=CC1=CC=C(C=C1S([O-])(=O)=O)N1N=C(C=N1)C1C=CC=CC=1)N1N=C(C=N1)C1C=CC=CC=1	[Na+].[K+]	OS(=O)(=O)C1C=C(C=CC=1C=CC1C=CC(=CC=1S(O)(=O)=O)N1N=C(C=N1)C1C=CC=CC=1)N1N=C(C=N1)C1C=CC=CC=1	68057-99-8	["Benzenesulfonic acid, 2,2'-(1,2-ethenediyl)bis[5-(4-phenyl-2H-1,2,3-triazol-2-yl)-, potassium sodium salt (1:1:1)"]	626.676	-155.059	-5.99978	Organic compounds	Phenylpropanoids and polyketides	Stilbenes	Sulfonated stilbenes			2.13118	0.558891	2.77094	0.63392			1.77073	0.135005	2.91519	0.638771
ACXQCFGTCOWPAQ-UHFFFAOYSA-N	CS(O)(=O)=O.OC1C=C2C(=CC=1)NC=C2CCCCN1CCC(=CC1)C1C=CC=CC=1	CS(=O)(=O)O	OC1C=C2C(=CC=1)NC=C2CCCCN1CC=C(CC1)C1C=CC=CC=1	119742-13-1	Roxindole mesylate	346.474	-42.8044	120.874	Organic compounds	Organoheterocyclic compounds	Indoles and derivatives	Hydroxyindoles			1.19207	-2.28983	2.36964	0.78297			0.977031	-0.243855	2.24364	0.7374
ACXWRVKTAODIKP-UHFFFAOYSA-N	CC(=O)OCCCC(F)(F)C(F)(F)C(F)(F)F		CC(=O)OCCCC(F)(F)C(F)(F)C(F)(F)F	25600-64-0	4,4,5,5,6,6,6-Heptafluorohexyl acetate	270.144	8.26296	-154.989	Organic compounds	Organic acids and derivatives	Carboxylic acids and derivatives	Carboxylic acid derivatives			1.38113	-0.674302	2.48102	0.568874			0.751343	-1.65688	2.27919	0.598023
ACXZENFMXUEBKB-UHFFFAOYSA-N	Cc1c[nH]c(=O)[nH]c1=NO		Cc1c[nH]c(=O)[nH]c1=NO	3171-25-3	5-Methyl-N(4)-hydroxycytosine	141.13	-15.2754	21.5456	Organic compounds	Organic nitrogen compounds	Organonitrogen compounds	Arylhydroxamates			1.67873	-0.0973338	2.44658	0.77156			1.156	-0.304297	2.30284	0.782448
ACYBVNYNIZTUIL-UHFFFAOYSA-N	NCCNCC1C=CC=CC=1		NCCNCC1C=CC=CC=1	4152-09-4	N-Benzylethylenediamine	150.225	-52.3964	-71.0927	Organic compounds	Benzenoids	Benzene and substituted derivatives	Phenylmethylamines			1.3566	-0.133759	2.20806	0.61398			1.21198	-0.41594	2.6551	0.632229
ACYFWRHALJTSCF-UHFFFAOYSA-N	CC(=O)NC(C)(C)C		CC(=O)NC(C)(C)C	762-84-5	N-tert-Butylacetamide	115.176	63.6322	-73.493	Organic compounds	Organic acids and derivatives	Carboxylic acids and derivatives	Carboxylic acid derivatives			1.8464	0.907429	2.4271	0.613433			1.45125	0.205706	2.44206	0.658177
ACYGYJFTZSAZKR-UHFFFAOYSA-J	[Ca+2].[Ca+2].[O-]C(=O)CN(CC([O-])=O)CCN(CC([O-])=O)CC([O-])=O	[Ca+2]	OC(=O)CN(CC(O)=O)CCN(CC(O)=O)CC(O)=O	19709-85-4	["Dicalcium 2,2',2'',2'''-(ethane-1,2-diyldinitrilo)tetraacetate"]	292.244	60.7064	-156.56	Organic compounds	Organic acids and derivatives	Carboxylic acids and derivatives	Tetracarboxylic acids and derivatives			1.90611	0.963339	2.56796	0.174854			1.2167	0.0911011	2.46239	0.239869
ACYLUAGCBGTEJF-UHFFFAOYSA-N	NS(=O)(=O)C1=CC(=CC(=C1Cl)[N+]([O-])=O)C(O)=O		NS(=O)(=O)C1=CC(=CC(=C1Cl)[N+]([O-])=O)C(O)=O	22892-96-2	4-Chloro-3-nitro-5-sulphamoylbenzoic acid	280.645	-124.942	10.7801	Organic compounds	Benzenoids	Benzene and substituted derivatives	Benzoic acids and derivatives			1.94027	-0.352437	2.8497	0.654977			0.961213	-0.88717	2.33722	0.674437
ACYOLKMEHHTLAB-UHFFFAOYSA-N	CC1C2=C3C=CC=CC3=CC=C2C=C2C=CC=CC2=1		CC1C2=C3C=CC=CC3=CC=C2C=C2C=CC=CC2=1	2422-79-9	12-Methylbenz[a]anthrancene	242.321	-106.759	46.2987	Organic compounds	Benzenoids	Phenanthrenes and derivatives				1.58403	-0.534407	2.406	0.675048			1.1611	-0.215719	2.54259	0.594458
ACYQQFWLJXHFND-UHFFFAOYSA-N	OCC#CCOC(=O)NC1C=C(Cl)C=CC=1		OCC#CCOC(=O)NC1C=C(Cl)C=CC=1	3159-28-2	4-Hydroxy-2-butynyl (3-chlorophenyl)carbamate	239.658	-84.4999	-55.1614	Organic compounds	Benzenoids	Benzene and substituted derivatives	Phenylcarbamic acid esters			1.16097	-0.552327	2.1826	0.616809			0.776366	-0.568353	2.15783	0.61132
ACYVDIMSMJEHRM-UHFFFAOYSA-N	NC1=CC=CC=C1C(=O)NC1CCCNC1=O		NC1=CC=CC=C1C(=O)NC1CCCNC1=O	84772-30-5	2-Amino-N-(2-oxo-3-piperidinyl)benzamide	233.271	25.4112	24.2601	Organic compounds	Organic acids and derivatives	Carboxylic acids and derivatives	Amino acids, peptides, and analogues			1.71256	0.261743	2.45326	0.740513			1.23371	-0.241874	2.82289	0.740513
ACYXDIZTQDLTCB-UVIKLTKHSA-N	OC(=O)C(O)(CC1C=C(O)C(O)=CC=1)C(OC(=O)C=CC1C=C(O)C(O)=CC=1)C(O)=O		OC(=O)C(O)(CC1C=C(O)C(O)=CC=1)C(OC(=O)C=CC1C=C(O)C(O)=CC=1)C(O)=O	50982-40-6	Fukinolic acid	434.353	10.2549	129.776	Organic compounds	Phenylpropanoids and polyketides	Cinnamic acids and derivatives	Hydroxycinnamic acids and derivatives			2.11874	0.469761	2.94794	0.727698			1.82091	-0.953925	3.06467	0.707135
ACZGCWSMSTYWDQ-UHFFFAOYSA-N	OC1=CC2=CC=CC=C2O1		OC1=CC2=CC=CC=C2O1	553-86-6	(3H)-Benzofuran-2-one	134.134	-85.1178	104.417	Organic compounds	Organoheterocyclic compounds	Benzofurans				1.56068	0.412541	2.25405	0.696083			1.20921	-0.0708227	2.20508	0.615378
ACZJZGLXRPZSLI-UHFFFAOYSA-N	CC1=NC(C)=C(C(C1C(=O)OCC)C1=CC=CC=C1C(F)(F)F)C(=O)OCC		CC1=NC(C)=C(C(C1C(=O)OCC)C1=CC=CC=C1C(F)(F)F)C(=O)OCC	23191-75-5	SK&F 24260	397.393	39.6044	35.4398	Organic compounds	Benzenoids	Benzene and substituted derivatives	Trifluoromethylbenzenes			1.2264	-0.339445	2.43647	0.676736			0.740451	-1.23604	2.37012	0.671352
ACZKMKGNTMOPBD-UHFFFAOYSA-N	CC1=CC(O)=C(C=C1CC1=CC(=C(O)C(CC2=CC(=C(O)C=C2C)S(O)(=O)=O)=C1C)S(O)(=O)=O)S(O)(=O)=O		CC1=CC(O)=C(C=C1CC1=CC(=C(O)C(CC2=CC(=C(O)C=C2C)S(O)(=O)=O)=C1C)S(O)(=O)=O)S(O)(=O)=O	101418-00-2	Policresulen	588.634	-133.253	-24.9748	Organic compounds	Phenylpropanoids and polyketides	Diarylheptanoids	Linear diarylheptanoids			2.10526	0.827194	2.79535	0.705895			1.76485	-0.504239	2.86353	0.726531
ACZURWACGCXVLA-UHFFFAOYSA-M	[Na+].CCCCCCCCOCCOCCOCCOCCOCCOCCOCCOCCOCC([O-])=O	[Na+]	CCCCCCCCOCCOCCOCCOCCOCCOCCOCCOCCOCC(O)=O	126646-15-9	3,6,9,12,15,18,21,24,27-Nonaoxapentatriacontanoic acid, sodium salt (1:1)	540.691	103.954	-63.4159	Organic compounds	Organic acids and derivatives	Carboxylic acids and derivatives	Carboxylic acid derivatives			2.33129	1.02711	3.00644	0.458036			2.27983	-0.952484	3.41356	0.486131
ACZVWYLTJHGUCP-UHFFFAOYSA-N	OC(NC=O)C(Cl)(Cl)Cl		OC(NC=O)C(Cl)(Cl)Cl	515-82-2	Chloral Formamide	192.429	58.4399	-115.183	Organic compounds	Organic acids and derivatives	Carboxylic acids and derivatives	Carboxylic acid derivatives			1.01395	-0.693946	2.3381	0.68518			0.98331	-0.412451	2.66888	0.726377
ACZWIDANLCXHBM-HRCADAONSA-N	COCCOCC(CC1(CCCC1)C(=O)NC1CCC(CC1)C(O)=O)C(O)=O		COCCOCC(CC1(CCCC1)C(=O)NC1CCC(CC1)C(O)=O)C(O)=O	123122-54-3	Candoxatrilat	399.484	101.338	25.2467	Organic compounds	Organic acids and derivatives	Carboxylic acids and derivatives	Dicarboxylic acids and derivatives			2.08235	0.431377	2.71403	0.668403			1.50694	-1.06247	2.84086	0.674594
ACZWIDANLCXHBM-UHFFFAOYSA-N	COCCOCC(CC1(CCCC1)C(=O)NC1CCC(CC1)C(O)=O)C(O)=O		COCCOCC(CC1(CCCC1)C(=O)NC1CCC(CC1)C(O)=O)C(O)=O	123898-42-0	4-{[{1-[2-Carboxy-3-(2-methoxyethoxy)propyl]cyclopentyl}(hydroxy)methylidene]amino}cyclohexane-1-carboxylic acid	399.484	101.336	25.2462	Organic compounds	Organic acids and derivatives	Carboxylic acids and derivatives	Dicarboxylic acids and derivatives			2.08235	0.431377	2.71403	0.668403			1.50694	-1.06247	2.84086	0.674594
ADACAMXIRQREOB-XUJMDKETSA-N	CC(=O)NC(C)C(O)CC(O)CCCCC(O)CC(C)CC(OC(=O)CC(CC(O)=O)C(O)=O)C(OC(=O)CC(CC(O)=O)C(O)=O)C(C)CCCC		CC(=O)NC(C)C(O)CC(O)CCCCC(O)CC(C)CC(OC(=O)CC(CC(O)=O)C(O)=O)C(OC(=O)CC(CC(O)=O)C(O)=O)C(C)CCCC	117415-48-2	Fumonisin A1	763.875	110.065	-36.7185	Organic compounds	Organic acids and derivatives	Carboxylic acids and derivatives	Fumonisins			2.27857	-0.207846	2.95453	0.718154			0.208837	-0.83042	3.03135	0.6235
ADADJCUTHQJPCB-UHFFFAOYSA-N	CCC[N+](CCC)(CCC)CCC.F[B-](F)(F)F	F[B-](F)(F)F	CCC[N+](CCC)(CCC)CCC	338-38-5	Ammonium, tetrapropyl-, tetrafluoroborate(1-)	186.363	29.0346	-104.972	Organic compounds	Organic nitrogen compounds	Organonitrogen compounds	Quaternary ammonium salts			1.6316	0.593707	2.34715	0.570028			0.983434	-0.690677	2.40947	0.605556
ADAGRLDCCJAKFP-UHFFFAOYSA-N	CN(CCC1C=C(OC)C(=CC=1)OC)CCCN(C1C=C(OC)C(=CC=1)OC)C(=O)C1C=CC(=CC=1)[N+]([O-])=O		CN(CCC1C=C(OC)C(=CC=1)OC)CCCN(C1C=C(OC)C(=CC=1)OC)C(=O)C1C=CC(=CC=1)[N+]([O-])=O	113241-09-1	N-(3,4-Dimethoxyphenyl)-N-[3-[[2-(3,4-dimethoxyphenyl)ethyl]methylamino]propyl]-4-nitrobenzamide	537.613	-19.2332	122.109	Organic compounds	Benzenoids	Benzene and substituted derivatives	Anilides			2.04175	0.174757	2.77048	0.68962			1.391	-0.353477	2.72225	0.701398
ADAHGVUHKDNLEB-UHFFFAOYSA-N	C1CC2OC2C1OC1CCC2OC21		C1CC2OC2C1OC1CCC2OC21	2386-90-5	["6-Oxabicyclo[3.1.0]hexane, 2,2'-oxybis-"]	182.219	103.272	50.4771	Organic compounds	Organoheterocyclic compounds	Oxanes				1.91494	0.440681	2.57279	0.805025			1.23723	-1.05689	2.50646	0.811101
ADAKRBAJFHTIEW-UHFFFAOYSA-N	O=C=NC1C=CC(Cl)=CC=1		O=C=NC1C=CC(Cl)=CC=1	104-12-1	4-Chlorophenyl isocyanate	153.568	-105.758	-24.5477	Organic compounds	Benzenoids	Benzene and substituted derivatives	Halobenzenes			0.92003	-0.599651	1.98245	0.664601		1.59288	0.670604	-0.597063	1.84236	0.626559
ADANNTOYRVPQLJ-UHFFFAOYSA-N	C[Si](C)(C)O[Si](C)(C)O[Si](C)(C)O[Si](C)(C)O[Si](C)(C)O[Si](C)(C)C		C[Si](C)(C)O[Si](C)(C)O[Si](C)(C)O[Si](C)(C)O[Si](C)(C)O[Si](C)(C)C	107-52-8	Tetradecamethylhexasiloxane	459.001	79.3921	-92.8784	Organic compounds	Organometallic compounds	Organometalloid compounds	Organosilicon compounds			2.18005	0.556026	2.86473	0.603854			1.74096	-0.208743	3.16554	0.557738
ADAOOVVYDLASGJ-UHFFFAOYSA-N	[Cl-].CC1C=C2C=C3C=C(C)C(N)=CC3=[N+](C)C2=CC=1N	[Cl-]	CC1C=C2C=C3C=C(C)C(N)=CC3=[N+](C)C2=CC=1N	40451-58-9	3,6-Diamino-2,7,10-trimethylacridin-10-ium chloride	252.341	-90.4923	33.5571	Organic compounds	Organoheterocyclic compounds	Quinolines and derivatives	Benzoquinolines			1.01577	-0.502003	2.30078	0.719762			0.715531	-0.739704	2.38721	0.636138
ADAOWDCHNZQKDI-UHFFFAOYSA-N	CCCCCC(=O)N1CCOCC1		CCCCCC(=O)N1CCOCC1	17598-10-6	Morpholine, 4-(1-oxohexyl)-	185.267	65.589	30.7578	Organic compounds	Organoheterocyclic compounds	Oxazinanes	Morpholines			1.85735	0.922271	2.52993	0.569707			1.16182	-0.201495	2.21004	0.607742
ADAUKUOAOMLVSN-UHFFFAOYSA-N	[Cl-].CN(C)C1C=C2[O+]=C3C(=NC2=CC=1)C(=CC(O)=C3O)C(O)=O	[Cl-]	CN(C)c1cc2oc3c([n]c2cc1)c(cc(O)c3O)C(O)=O	1562-85-2	Gallocyanin	301.278	-131.545	-75.9683	Organic compounds	Organoheterocyclic compounds	Benzoxazines	Phenoxazines			1.94619	0.155331	2.77527	0.782161			1.43073	-0.299151	2.85711	0.827
ADBDSOAUIVHRFK-OSQBQZLYSA-N	[Co+2].OCC(O)C(O)C(O)C(O)C(O)=O	[Co+2]	OCC(O)C(O)C(O)C(O)C(O)=O	71957-08-9	Cobaltous gluconate	196.155	53.0174	-95.166	Organic compounds	Organic acids and derivatives	Hydroxy acids and derivatives	Medium-chain hydroxy acids and derivatives			2.04083	0.677903	2.68407	0.453031			2.2258	0.0332368	3.05335	0.571031
ADBFDJQRBQZXAB-UHFFFAOYSA-N	COC1=CC=CC=C1OP(=O)(OC1=CC=CC=C1OC)OC1=CC=CC=C1OC		COC1=CC=CC=C1OP(=O)(OC1=CC=CC=C1OC)OC1=CC=CC=C1OC	563-03-1	Guaiacol phosphate	416.366	-52.5856	5.86392	Organic compounds	Organic acids and derivatives	Organic phosphoric acids and derivatives	Phosphate esters			1.39189	-1.30249	2.47431	0.616414			0.939178	-3.272	2.33696	0.607525
ADBLJUDPXDJMMK-UHFFFAOYSA-N	COc1c(OC)c2c(=O)cc(oc2c(OC)c1OC)C1C=C(C=C(C=1)OC)OC		COc1c(OC)c2c(=O)cc(oc2c(OC)c1OC)C1C=C(C=C(C=1)OC)OC	70460-29-6	2-(3,5-Dimethoxyphenyl)-5,6,7,8-tetramethoxy-4H-chromen-4-one	402.399	-80.7519	129.647	Organic compounds	Phenylpropanoids and polyketides	Flavonoids	O-methylated flavonoids			1.96049	0.279207	2.86616	0.78097			1.03497	-1.54975	2.59512	0.76808
ADBSXCRGUFFLBC-UHFFFAOYSA-N	CCCCCCCCCCCCCCCCCCCCCC[Si](Cl)(Cl)Cl		CCCCCCCCCCCCCCCCCCCCCC[Si](Cl)(Cl)Cl	7325-84-0	Trichlorodocosylsilane	444.047	85.3296	-99.884	Organic compounds	Organometallic compounds	Organometalloid compounds	Organosilicon compounds			1.72876	-0.293984	2.80981	0.5			1.61144	-0.657609	3.03109	0.4
ADBXTULQWMWTBQ-UHFFFAOYSA-N	[O-][N+](=O)c1c(c2ccccc2oc1=O)N1CCCC1		[O-][N+](=O)c1c(c2ccccc2oc1=O)N1CCCC1	56879-65-3	Coumarin, 3-nitro-4-(1-pyrrolidinyl)-	260.249	-90.4454	113.323	Organic compounds	Phenylpropanoids and polyketides	Coumarins and derivatives				1.61443	0.0190506	2.46334	0.742663			0.602089	-0.893668	2.29845	0.722574
ADCBKYIHQQCFHE-UHFFFAOYSA-N	CN(C(=O)N(C)C1C=CC=CC=1)C1C=CC=CC=1		CN(C(=O)N(C)C1C=CC=CC=1)C1C=CC=CC=1	611-92-7	1,3-Dimethyl-1,3-diphenylurea	240.306	-107.528	-75.6525	Organic compounds	Benzenoids	Benzene and substituted derivatives	N-phenylureas		2.06451	1.53622	0.271465	2.37297	0.537032		1.21891	0.977906	-0.282488	2.19426	0.542383
ADCDISFHDLKFFS-DQYPLQBXSA-N	CC1CC2C(CC3=CN(CC=C)C4=CC=CC2=C34)N(C1)C#N		CC1CC2C(CC3=CN(CC=C)C4=CC=CC2=C34)N(C1)C#N	98931-07-8	8-Methyl-1-(prop-2-en-1-yl)ergoline-6-carbonitrile	291.398	-3.44275	173.93	Organic compounds	Alkaloids and derivatives	Ergoline and derivatives	Clavines and derivatives			1.26797	-0.444081	2.31463	0.786042			0.673793	-0.795037	2.16674	0.831558
ADCUEPOHPCPMCE-UHFFFAOYSA-N	N#CC1C=CC(=CC=1)C(O)=O		N#CC1C=CC(=CC=1)C(O)=O	619-65-8	4-Cyanobenzoic acid	147.133	-50.8883	-35.7721	Organic compounds	Benzenoids	Benzene and substituted derivatives	Benzoic acids and derivatives			1.75192	0.720675	2.48546	0.494981			1.31077	-0.298227	2.41187	0.517267
ADCWDMYESTYBBN-UHFFFAOYSA-N	CC1=CC(=CC=C1N=NC1C=CC(=CC=1)[N+]([O-])=O)N(CCO)CCO		CC1=CC(=CC=C1N=NC1C=CC(=CC=1)[N+]([O-])=O)N(CCO)CCO	3179-89-3	C.I. Disperse Red 17	344.371	-154.978	-56.1141	Organic compounds	Organoheterocyclic compounds	Azobenzenes				1.86592	0.368366	2.59288	0.630447			1.47795	-0.186508	2.72907	0.668735
ADCYRBXQAJXJTD-UHFFFAOYSA-N	CCC(=O)C1C=CC(Cl)=CC=1		CCC(=O)C1C=CC(Cl)=CC=1	6285-05-8	Ethyl 4-chlorophenyl ketone	168.623	-41.4534	-44.0005	Organic compounds	Organic oxygen compounds	Organooxygen compounds	Carbonyl compounds			1.11852	-0.222183	2.22081	0.615416			0.889836	-0.421044	1.93976	0.609729
ADDGAKQSFRASOV-UHFFFAOYSA-N	CCCCCCCCC(=O)C=C		CCCCCCCCC(=O)C=C	42832-47-3	1-Undecen-3-one	168.28	86.3073	-56.1228	Organic compounds	Organic oxygen compounds	Organooxygen compounds	Carbonyl compounds			2.04184	1.01766	2.62827	0.470989			1.62738	0.371507	2.45151	0.477333
ADDNDYGTXADGMI-UHFFFAOYSA-N	CC1=CC(=CC(C)=C1C=O)N(C)C		CC1=CC(=CC(C)=C1C=O)N(C)C	4980-19-2	4-(Dimethylamino)-2,6-dimethylbenzaldehyde	177.247	-74.5777	-2.61943	Organic compounds	Benzenoids	Benzene and substituted derivatives	Benzoyl derivatives			1.40044	0.232997	2.29305	0.695289			0.76104	-0.525887	2.07527	0.693941
ADDORFBRRWECKX-UHFFFAOYSA-N	CC1CN(CCC1)N=O		CC1CN(CCC1)N=O	13603-07-1	3-METHYL-N-NITROSOPIPERIDINE	128.175	68.4705	35.8336	Organic compounds	Organoheterocyclic compounds	Piperidines	Nitrosopiperidines			1.65358	0.367075	2.38107	0.775637			0.407062	-2.01806	1.92299	0.766477
ADDQHLREJDZPMT-AWEZNQCLSA-N	CC(OC1C=CC(=CC=1)OC1=NC2=CC=C(Cl)C=C2O1)C(=O)N(C)C1=CC=CC=C1F		CC(OC1C=CC(=CC=1)OC1=NC2=CC=C(Cl)C=C2O1)C(=O)N(C)C1=CC=CC=C1F	256412-89-2	Metamifop	440.858	-59.7628	-115.353	Organic compounds	Organic oxygen compounds	Organooxygen compounds	Ethers			0.991322	-2.14339	2.45291	0.610401			0.761086	-1.53621	2.34366	0.59243
ADDZHRRCUWNSCS-UHFFFAOYSA-N	O=CC1=CC2=CC=CC=C2O1		O=CC1=CC2=CC=CC=C2O1	4265-16-1	2-Benzofurancarboxaldehyde	146.145	-84.7813	104.066	Organic compounds	Organoheterocyclic compounds	Benzofurans				1.52624	0.482992	2.24605	0.698625		0.679318	1.2302	-0.0351326	2.38877	0.644342
ADDZHZUZVQDCOP-UHFFFAOYSA-N	NCC1C2C(CC1CN)C1CC2CC1		NCC1C2C(CC1CN)C1CC2CC1	68889-71-4	4,7-Methano-1H-indenedimethanamine, octahydro-	194.322	113.783	56.8292	Organic compounds	Lipids and lipid-like molecules	Prenol lipids	Monoterpenoids			1.13385	-2.6977	2.29602	0.774918			0.727759	-3.60083	2.19233	0.803714
ADEBPBSSDYVVLD-UHFFFAOYSA-N	COC1=CC2CC(CC3CCN(CC4C=CC=CC=4)CC3)C(=O)C=2C=C1OC		COC1=CC2CC(CC3CCN(CC4C=CC=CC=4)CC3)C(=O)C=2C=C1OC	120014-06-4	Donepezil	379.5	-1.22783	84.3291	Organic compounds	Organoheterocyclic compounds	Piperidines	Benzylpiperidines			1.39962	-0.134637	2.46255	0.755059			0.815634	-0.46324	2.25604	0.755414
ADEORFBTPGKHRP-UHFFFAOYSA-N	CN(C)c1cc2oc(=O)c(c(C)c2cc1)N1C(=O)C=CC1=O		CN(C)c1cc2oc(=O)c(c(C)c2cc1)N1C(=O)C=CC1=O	55145-14-7	1H-Pyrrole-2,5-dione, 1-[7-(dimethylamino)-4-methyl-2-oxo-2H-1-benzopyran-3-yl]-	298.298	-77.4213	111.596	Organic compounds	Phenylpropanoids and polyketides	Coumarins and derivatives				1.87518	0.203748	2.55092	0.710017			1.05926	-0.839506	2.51492	0.743371
ADEORIQORDFWJX-UHFFFAOYSA-N	CCCCCCCCCCCCCCCCCC(=O)N(CCOCCO)CCOCCO		CCCCCCCCCCCCCCCCCC(=O)N(CCOCCO)CCOCCO	31587-81-2	Poly(oxy-1,2-ethanediyl), Î±,Î±â€²-[[(1-oxooctadecyl)imino]di-2,1-ethanediyl]bis[Ï‰-hydroxy-	459.712	70.2734	-34.8905	Organic compounds	Lipids and lipid-like molecules	Fatty Acyls	Fatty amides			2.20926	0.434261	2.90211	0.483483			1.10429	-0.245187	2.74792	0.515152
ADEQPGWHCPALGB-UHFFFAOYSA-N	CC(C)CN(CC#N)CC(C)C		CC(C)CN(CC#N)CC(C)C	25553-97-3	Acetonitrile, diisobutylamino-	168.284	103.061	-102.866	Organic compounds	Organic nitrogen compounds	Organonitrogen compounds	Amines			1.51751	0.273526	2.3722	0.624023			0.74508	-0.682979	2.02394	0.731874
ADETVRISJJRVMM-UHFFFAOYSA-N	O.Cl.CC(C)(CC[n]1c(=O)[nH]c2ccccc12)NCC(O)COC1=CC=CC2=CC=CC=C21	O.Cl	CC(C)(CC[n]1c(=O)[nH]c2ccccc12)NCC(O)COC1=CC=CC2=CC=CC=C21	75708-29-1	1-[3-({2-Hydroxy-3-[(naphthalen-1-yl)oxy]propyl}amino)-3-methylbutyl]-1H-benzimidazol-2-ol--hydrogen chloride--water (1/1/1)	419.525	-4.95899	-109.347	Organic compounds	Benzenoids	Naphthalenes				2.0063	0.249372	2.67568	0.733667			1.26789	-0.0731768	2.44896	0.727369
ADFCQWZHKCXPAJ-GFCCVEGCSA-N	OC1C=C2OCC(CC2=CC=1)C1C=CC(O)=CC=1		OC1C=C2OCC(CC2=CC=1)C1C=CC(O)=CC=1	531-95-3	Equol	242.274	-1.12853	137.734	Organic compounds	Phenylpropanoids and polyketides	Isoflavonoids	Isoflavans			1.31267	-3.15187	2.31812	0.750693			0.971811	-0.720621	2.20041	0.747618
ADFCQWZHKCXPAJ-LBPRGKRZSA-N	OC1C=C2OCC(CC2=CC=1)C1C=CC(O)=CC=1		OC1C=C2OCC(CC2=CC=1)C1C=CC(O)=CC=1	221054-79-1	(+)-Equol	242.274	-1.12617	137.733	Organic compounds	Phenylpropanoids and polyketides	Isoflavonoids	Isoflavans			1.31267	-3.15187	2.31812	0.750693			0.971811	-0.720621	2.20041	0.747618
ADFCQWZHKCXPAJ-UHFFFAOYSA-N	OC1C=C2OCC(CC2=CC=1)C1C=CC(O)=CC=1		OC1C=C2OCC(CC2=CC=1)C1C=CC(O)=CC=1	94105-90-5	(R,S)-Equol	242.274	-1.12635	137.733	Organic compounds	Phenylpropanoids and polyketides	Isoflavonoids	Isoflavans			1.31267	-3.15187	2.31812	0.750693			0.971811	-0.720621	2.20041	0.747618
ADFIQZBYNGPCGY-HTJQZXIKSA-N	CC12CC(OC(C)=O)C(OC3CC(C)C(=O)C(=O)C13CO)C12CO1		CC12CC(OC(C)=O)C(OC3CC(C)C(=O)C(=O)C13CO)C12CO1	50722-38-8	3-Acetyldeoxynivalenol	338.356	86.2265	111.582	Organic compounds	Lipids and lipid-like molecules	Prenol lipids	Sesquiterpenoids			1.85828	-3.05653	2.68956	0.763623			1.05985	-2.24625	2.794	0.769336
ADFKONUNMDNABY-UHFFFAOYSA-N	O=C1C=CC(=O)N1CC1=CC=CC=N1		O=C1C=CC(=O)N1CC1=CC=CC=N1	6331-16-4	1-(pyridin-2-ylmethyl)pyrrole-2,5-dione	188.186	-36.8289	-9.7355	Organic compounds	Organoheterocyclic compounds	Pyrrolidines	Pyrrolidones			1.67532	0.147178	2.45929	0.707255			0.782291	-0.805154	2.35435	0.741972
ADFKUAKREZUYMC-QNMIOERPSA-N	COC1C=C(C=C(OC)C=1O)C1C2C(COC2=O)C(NC2C=CC(=CC=2)[N+]([O-])=O)C2C=C(OC)C(=CC=21)OC		COC1C=C(C=C(OC)C=1O)C1C2C(COC2=O)C(NC2C=CC(=CC=2)[N+]([O-])=O)C2C=C(OC)C(=CC=21)OC	138355-94-9	(3aS-(3aalpha,4beta,9alpha,9abeta))-3a,4,9,9a-Tetrahydro-9-(4-hydroxy-3,5-dimethoxyphenyl)-6,7-dimethoxy-4-((4-nitrophenyl)amino)naphtho(2,3-c)furan-1(3H)-one	536.537	-5.46484	133.356	Organic compounds	Lignans, neolignans and related compounds	Lignan lactones				2.18405	0.208138	3.02588	0.704647			1.04298	-1.61287	2.61253	0.728722
ADFOJJHRTBFFOF-RBRWEJTLSA-N	CC12CCC3C(CCC4=CC(=CC=C43)OC(=O)N(CCCl)CCCl)C1CCC2OP(O)(O)=O		CC12CCC3C(CCC4=CC(=CC=C43)OC(=O)N(CCCl)CCCl)C1CCC2OP(O)(O)=O	4891-15-0	Estramustine phosphate	520.39	121.102	134.317	Organic compounds	Lipids and lipid-like molecules	Steroids and steroid derivatives	Estrane steroids			1.45567	-0.874119	2.69887	0.698642			0.474104	-2.7542	2.41052	0.703346
ADFOLUXMYYCTRR-OKILXGFUSA-N	CC(CC1C=C(OC)C(O)=CC=1)C(C)CC1C=C(OC)C(O)=CC=1		CC(CC1C=C(OC)C(O)=CC=1)C(C)CC1C=C(OC)C(O)=CC=1	66322-34-7	Meso-dihydroguaiaretic acid	330.424	-17.8576	113.348	Organic compounds	Lignans, neolignans and related compounds	Dibenzylbutane lignans				1.49128	-0.469503	2.41098	0.549601			1.02521	-0.191201	2.28956	0.515443
ADFOMBKCPIMCOO-BTVCFUMJSA-N	Cl.NC(C(O)CO)C(=O)C(O)CO	Cl	NC(C(O)CO)C(=O)C(O)CO	57649-10-2	D-Glucose, 3-amino-3-deoxy-, hydrochloride	179.172	50.8195	-101.353	Organic compounds	Organic oxygen compounds	Organooxygen compounds	Carbohydrates and carbohydrate conjugates			2.03133	0.639767	2.78848	0.693808			2.1308	0.571154	3.01155	0.683738
ADFVBEOHHMMWBZ-UHFFFAOYSA-N	OC1C(CN2CCCC2)=CC(=CC=1CN1CCCC1)NC1N=CN=C2C=CC=CC2=1		OC1C(CN2CCCC2)=CC(=CC=1CN1CCCC1)NC1N=CN=C2C=CC=CC2=1	72063-47-9	Changrolin	403.53	-59.0398	102.117	Organic compounds	Organoheterocyclic compounds	Diazanaphthalenes	Benzodiazines			1.49259	-0.303827	2.49244	0.772382			0.96646	-0.16356	2.32514	0.76469
ADFWQBGTDJIESE-UHFFFAOYSA-N	CCCCCCCCCCCCCCCC1=CC=CC(O)=C1C(O)=O		CCCCCCCCCCCCCCCC1=CC=CC(O)=C1C(O)=O	16611-84-0	6-Pentadecylsalicylic acid	348.527	-32.9046	-95.428	Organic compounds	Benzenoids	Benzene and substituted derivatives	Benzoic acids and derivatives			1.84267	0.667506	2.60786	0.531993			1.2769	0.342652	2.51265	0.514452
ADFXKUOMJKEIND-UHFFFAOYSA-N	O=C(NC1CCCCC1)NC1CCCCC1		O=C(NC1CCCCC1)NC1CCCCC1	2387-23-7	1,3-Dicyclohexylurea	224.348	101.614	30.6601	Organic compounds	Organic acids and derivatives	Organic carbonic acids and derivatives	Ureas			1.59684	-0.0371255	2.42481	0.645111			1.01931	-0.325899	2.38452	0.658047
ADGDUIDDAMQKAG-UHFFFAOYSA-N	C1=NC2=CC=CC=C2N=C1C1=CC=CS1		C1=NC2=CC=CC=C2N=C1C1=CC=CS1	40353-41-1	2-(2-Thienyl)quinoxaline	212.277	-82.6946	38.3127	Organic compounds	Organoheterocyclic compounds	Diazanaphthalenes	Benzodiazines			1.0362	-0.248051	2.17598	0.721212			0.831714	-0.455639	1.91972	0.727392
ADGFHVQVFSZWGS-UHFFFAOYSA-N	CCOC(=O)CC1(O)C2(C)CCCC1(C)CC2		CCOC(=O)CC1(O)C2(C)CCCC1(C)CC2	83878-04-0	Ethyl (8-hydroxy-1,5-dimethylbicyclo[3.2.1]octan-8-yl)acetate	240.343	93.3769	52.6788	Organic compounds	Organic oxygen compounds	Organooxygen compounds	Alcohols and polyols			1.848	0.131602	2.54168	0.60119			0.752201	-1.94393	2.29906	0.647416
ADGGJQPKBDIZMT-UHFFFAOYSA-K	[Na+].[Na+].[Na+].[O-]S(=O)(=O)C1=CC(O)=C2C(=CC(=CC2=C1)S([O-])(=O)=O)N=NC1=CC=C(NC2C=CC=CC=2)C2C1=CC=CC=2S([O-])(=O)=O	[Na+]	OC1=CC(=CC2C=C(C=C(N=NC3C=CC(NC4C=CC=CC=4)=C4C(=CC=CC=34)S(O)(=O)=O)C1=2)S(O)(=O)=O)S(O)(=O)=O	3861-73-2	Anazolene sodium	629.65	-151.352	-12.9549	Organic compounds	Benzenoids	Naphthalenes	1,1'-azonaphthalenes			2.09156	1.15281	2.72932	0.530837			1.99405	0.86421	2.90307	0.660947
ADGHJAMZMQOFIX-UHFFFAOYSA-N	FC(F)(Cl)C(F)(F)C(F)(F)C(F)(F)C(F)(F)C(F)(F)CCI		FC(F)(Cl)C(F)(F)C(F)(F)C(F)(F)C(F)(F)C(F)(F)CCI	150223-08-8	1-Chloro-1,1,2,2,3,3,4,4,5,5,6,6-dodecafluoro-8-iodooctane	490.453	19.6553	-155.389	Organic compounds	Organohalogen compounds	Organoiodides				1.03767	-1.00384	2.34969	0.655425			-0.106044	-2.08026	2.13716	0.680927
ADGIWWYGVBZYMC-UHFFFAOYSA-N	C(C1CCCCC1)N1CCCC1		C(C1CCCCC1)N1CCCC1	5005-27-6	N-(Cyclohexylmethyl)Pyrrolidine	167.296	66.6825	41.1943	Organic compounds	Organoheterocyclic compounds	Pyrrolidines	N-alkylpyrrolidines			1.5771	0.373582	2.42362	0.723624			0.736038	-0.534524	2.04991	0.72747
ADGJZVKOKVENDN-UHFFFAOYSA-N	CC(=C)C(=O)NCOCCCC		CC(=C)C(=O)NCOCCCC	5153-77-5	N-(Butoxymethyl)methacrylamide	171.24	64.599	-45.1371	Organic compounds	Organic acids and derivatives	Carboxylic acids and derivatives	Carboxylic acid derivatives			1.74239	-0.284499	2.44093	0.469697			1.41141	0.066947	2.30686	0.5602
ADGLTJIAPPIFCW-LGMIJSBOSA-J	[Ca+2].CN(C)CC(=O)OCC(O)C(O)C(O)C(O)C([O-])=O.CN(C)CC(=O)OCC(O)C(O)C(O)C(O)C([O-])=O.CN(C)CC(=O)OCC(O)C(O)C(O)C(O)C([O-])=O.CN(C)CC(=O)OCC(O)C(O)C(O)C(O)C([O-])=O	[Ca+2]	CN(C)CC(=O)OCC(O)C(O)C(O)C(O)C(O)=O	20310-61-6	Calcium pangamate	281.261	49.889	-91.6379	Organic compounds	Organic acids and derivatives	Carboxylic acids and derivatives	Amino acids, peptides, and analogues			2.04421	0.872964	2.72789	0.682563			1.37044	-0.319568	2.94432	0.736306
ADHAFJLXGIAZAN-UHFFFAOYSA-N	CC(=O)C(=NNC1=CC(=CC=C1Cl)C(=O)NC1=CC(Cl)=CC=C1C)C(=O)NC1=CC(Cl)=C(C=C1Cl)NC(=O)C(N=NC1=CC(=CC=C1Cl)C(=O)NC1=CC(Cl)=CC=C1C)C(C)=O		CC(=O)C(N=NC1C=C(C=CC=1Cl)C(=O)NC1C=C(Cl)C=CC=1C)C(=O)NC1C=C(Cl)C(=CC=1Cl)NC(=O)C(N=NC1C=C(C=CC=1Cl)C(=O)NC1C=C(Cl)C=CC=1C)C(C)=O	5580-58-5	["Benzamide, 3,3'-[(2,5-dichloro-1,4-phenylene)bis[imino(1-acetyl-2-oxo-2,1-ethanediyl)-2,1-diazenediyl]]bis[4-chloro-N-(5-chloro-2-methylphenyl)-"]	957.486	-157.92	21.0263	Organic compounds	Organic acids and derivatives	Carboxylic acids and derivatives	Amino acids, peptides, and analogues		2.4113	2.4916	1.77189	3.08597	0.340973		2.28138	2.29378	-4.03737	2.75681	0.529417
ADHASKYQWAONSZ-UHFFFAOYSA-N	CC1C=C(C=C(C)N=1)C1C=C(N)C=CC=1		CC1C=C(C=C(C)N=1)C1C=C(N)C=CC=1	40034-51-3	3-(2,6-Dimethyl-4-pyridyl)aniline	198.269	-67.7117	25.2813	Organic compounds	Organoheterocyclic compounds	Pyridines and derivatives	Phenylpyridines			1.12001	-0.529411	2.08834	0.616082			0.658564	-0.626472	1.99868	0.620712
ADHAUWMNDHMUMH-UHFFFAOYSA-L	[Ni+2].[O-]C(=O)CN(CC(O)=O)CC([O-])=O	[Ni+2]	OC(=O)CN(CC(O)=O)CC(O)=O	34831-03-3	(Hydrogen nitrilotriacetato)nickel	191.139	60.7819	-154.21	Organic compounds	Organic acids and derivatives	Carboxylic acids and derivatives	Amino acids, peptides, and analogues			1.86181	0.92878	2.53931	0.283611			1.03669	0.164652	2.2377	0.300278
ADHCYQWFCLQBFG-UHFFFAOYSA-N	CCC(=C)C(C)C		CCC(=C)C(C)C	7357-93-9	2-Ethyl-3-methylbut-1-ene	98.189	99.8595	-69.6965	Organic compounds	Hydrocarbons	Unsaturated hydrocarbons	Branched unsaturated hydrocarbons			1.80941	0.682887	2.4513	0.714927			1.42974	0.316552	2.21903	0.724125
ADHMSYVDAOEEPZ-UHFFFAOYSA-N	CN(C)C(=S)SC(SC(=S)N(C)C)C1C=CC=CC=1		CN(C)C(=S)SC(SC(=S)N(C)C)C1C=CC=CC=1	49773-60-6	Benzylidene bis(dimethyldithiocarbamate)	330.569	-15.9615	-54.8745	Organic compounds	Benzenoids	Benzene and substituted derivatives				0.856631	-1.11923	2.19751	0.651686			0.651659	-1.29252	1.83669	0.645878
ADHMUPZYLITZIH-UHFFFAOYSA-N	CC(C)COCC1C=CC=CC=1		CC(C)COCC1C=CC=CC=1	940-49-8	alpha-Isobutoxytoluene	164.248	6.87194	-39.4127	Organic compounds	Benzenoids	Benzene and substituted derivatives	Benzylethers			1.58505	0.463979	2.341	0.515263			1.4199	0.2179	2.37588	0.60867
ADHQLIGSIQGNBW-UHFFFAOYSA-N	O=C(C1=CNC2=CC=CC=C21)C1C=CC=CC=1		O=C(C1=CNC2=CC=CC=C21)C1C=CC=CC=1	15224-25-6	3-Benzoylindole	221.259	-50.3684	132.824	Organic compounds	Organoheterocyclic compounds	Indoles and derivatives	Benzoylindoles			1.70987	0.493798	2.3878	0.626964			1.30201	0.0319978	2.58186	0.586341
ADHVMGAFAKSNOM-UHFFFAOYSA-N	NC1SC2CCCCC=2C=1C#N		NC1SC2CCCCC=2C=1C#N	4651-91-6	2-Amino-4,5,6,7-tetrahydrobenzo(b)thiophene-3-carbonitrile	178.26	-29.2775	22.2949	Organic compounds	Organoheterocyclic compounds	Thiophenes	Aminothiophenes			0.927126	-0.76618	4.05101	0.794026			0.599844	-1.03393	2.14296	0.795414
ADHXMRRHLUTERX-UHFFFAOYSA-N	CC(C)C1=CC=CC(C(C)C)=C1OS(N)(=O)=O		CC(C)C1=CC=CC(C(C)C)=C1OS(N)(=O)=O	92050-02-7	2,6-Di(propan-2-yl)phenyl sulfamate	257.355	-49.9246	-12.8883	Organic compounds	Benzenoids	Benzene and substituted derivatives	Cumenes			1.57763	0.164456	2.44437	0.673263			1.20093	-1.41625	2.30279	0.612545
ADHZHPOKTRHZGT-DXCKQFNASA-N	CC1=NC(NC2CC3CC2CC3)=C(C=N1)C1C=CC(=CC=1)C(F)(F)F		CC1=NC(NC2CC3CC2CC3)=C(C=N1)C1C=CC(=CC=1)C(F)(F)F	917896-43-6	N-[(1R,2R,4S)-Bicyclo[2.2.1]hept-2-yl]-2-methyl-5-[4-(trifluoromethyl)phenyl]-4-pyrimidinamine	347.384	26.3565	21.9924	Organic compounds	Organoheterocyclic compounds	Diazines	Pyrimidines and pyrimidine derivatives			0.974441	-0.593871	2.26812	0.791363			0.57332	-1.22803	1.86373	0.778202
ADHZMOYUJKFKSE-UHFFFAOYSA-N	CC1(C)C=C(C)C2=CC(CC3C=C4C(=CC=3)NC(C)(C)C=C4C)=CC=C2N1		CC1(C)C=C(C)C2=CC(CC3C=C4C(=CC=3)NC(C)(C)C=C4C)=CC=C2N1	41208-07-5	["6,6'-Methylene bis(2,2,4-trimethyl-1,2-dihydroquinoline)"]	358.529	-42.9864	74.6041	Organic compounds	Organoheterocyclic compounds	Quinolines and derivatives	Quinolones and derivatives			1.33783	-0.12814	2.39041	0.68027			0.74767	-0.382906	2.26102	0.677887
ADIDFXCLFPHHLE-UHFFFAOYSA-N	CC1=CN=C(CC)O1		CC1=CN=C(CC)O1	42463-54-7	2-Ethyl-5-methyloxazole	111.144	3.12633	5.74365	Organic compounds	Organoheterocyclic compounds	Azoles	Oxazoles			1.60203	0.428237	2.37549	0.760695			1.00059	-0.425643	2.01614	0.776243
ADIDQIZBYUABQK-RWMBFGLXSA-N	CC(=C)C1CC2C(C)CCC=2C(C)CC1		CC(=C)C1CC2C(C)CCC=2C(C)CC1	3691-12-1	alpha-Guaiene	204.357	95.8912	74.946	Organic compounds	Lipids and lipid-like molecules	Prenol lipids	Sesquiterpenoids			1.62818	-0.0295549	2.50896	0.736261			0.783347	-0.364069	2.01291	0.750352
ADIMAYPTOBDMTL-UHFFFAOYSA-N	OC1NC2=CC=C(Cl)C=C2C(=NC1=O)C1C=CC=CC=1		OC1NC2=CC=C(Cl)C=C2C(=NC1=O)C1C=CC=CC=1	604-75-1	Oxazepam	286.718	-53.0867	85.1737	Organic compounds	Organoheterocyclic compounds	Benzodiazepines	1,4-benzodiazepines			1.12584	-0.454498	2.43468	0.727436	1.24076	1.24076	0.806237	-0.292871	2.23152	0.571561
ADIMXZFQGLGLEV-UHFFFAOYSA-N	Cl.C[S+](C)CC([O-])=O	Cl	C[S+](C)CC([O-])=O	10132-50-0	(Dimethylsulfaniumyl)acetate--hydrogen chloride (1/1)	120.173	81.014	-65.0993	Organic compounds	Organic acids and derivatives	Carboxylic acids and derivatives	Carboxylic acids			1.70562	0.172523	2.48545	0.717498			1.17434	-0.607431	2.73676	0.738374
ADIOCFWWNVGAIN-UHFFFAOYSA-M	CCCCCCCCCCCCCCCCCCCCCC1N(CCO)CC[N+]=1C.COS([O-])(=O)=O	COS(=O)(=O)[O-]	CCCCCCCCCCCCCCCCCCCCCC1N(CCO)CC[N+]=1C	93783-31-4	2-Henicosyl-1-(2-hydroxyethyl)-3-methyl-4,5-dihydro-1H-imidazol-3-ium methyl sulfate	423.75	46.7447	-28.2995	Organic compounds	Organic acids and derivatives	Organic sulfuric acids and derivatives	Sulfuric acid esters			1.75889	0.255408	2.72793	0.643972			1.04402	-0.151946	2.77098	0.666667
ADIPKVVCLKSSBN-UHFFFAOYSA-N	Cc1c(C)c(=O)[n]2c(=O)[n](C3C=CC=CC=3)c(=O)[n]21		Cc1c(C)c(=O)[n]2c(=O)[n](C3C=CC=CC=3)c(=O)[n]21	81911-96-8	6,7-Dimethyl-2-phenyl-1H,5H-pyrazolo(1,2-a)(1,2,4)triazole-1,3,5(2H)-trione	257.249	-41.5999	45.1128	Organic compounds	Organoheterocyclic compounds	Azoles	Triazoles			1.70306	0.0661147	2.49417	0.691514			0.953763	-0.671963	2.38025	0.725436
ADITXIOZDFZRAT-UHFFFAOYSA-N	COc1c2c(=O)c3C[N+]4(CC(=C)c3oc2c(OC)c2occc12)CCCCC4		COc1c2c(=O)c3C[N+]4(CC(=C)c3oc2c(OC)c2occc12)CCCCC4	775517-13-0	Azaspirium	382.436	-68.1598	120.106	Organic compounds	Organoheterocyclic compounds	Benzopyrans	1-benzopyrans			1.81983	0.229519	2.63632	0.814356			0.842839	-0.729568	2.51859	0.828431
ADJJLNODXLXTIH-UHFFFAOYSA-N	SC12CC3CC(C1)CC(C2)C3		SC12CC3CC(C1)CC(C2)C3	34301-54-7	Tricyclo(3.3.1.1(3,7))decane-1-thiol	168.305	83.8308	50.6551	Organic compounds	Organosulfur compounds	Thiols	Alkylthiols			1.23137	-1.3149	2.38878	0.843874			0.708469	-3.6257	2.17908	0.834751
ADJMNWKZSCQHPS-UHFFFAOYSA-L	[Zn+2].CC(C)CCCCC([O-])=O.CC(C)CCCCC([O-])=O	[Zn+2]	CC(C)CCCCC(O)=O	84082-93-9	Zinc isooctanoate	144.214	103.098	-52.0403	Organic compounds	Lipids and lipid-like molecules	Fatty Acyls	Fatty acids and conjugates			2.0679	1.16036	2.62728	0.45272			1.80769	0.865917	2.70992	0.447068
ADJOFKQEIQPYRI-UHFFFAOYNA-N	CC(C)OC1COC2C1OCC2OC(C)C		CC(C)OC1COC2C1OCC2OC(C)C	103594-41-8	3,6-Bis[(propan-2-yl)oxy]hexahydrofuro[3,2-b]furan	230.304	141.193	43.7688	Organic compounds	Organoheterocyclic compounds	Furofurans	Isosorbides			1.79267	0.273721	2.56905	0.72701			1.39959	-0.277656	2.56076	0.779353
ADJQQSUBKRASQN-UHFFFAOYSA-N	OC1=C(Br)C=C(Cl)C2=CC=CN=C21		OC1=C(Br)C=C(Cl)C2=CC=CN=C21	7640-33-7	8-Quinolinol, 7-bromo-5-chloro-	258.502	-100.567	32.5364	Organic compounds	Organoheterocyclic compounds	Quinolines and derivatives	Haloquinolines			1.12207	-0.803546	2.39953	0.715352			1.20315	-0.472188	2.21224	0.617583
ADJWCDXUXUVWNV-UHFFFAOYSA-N	CCCCCCCCCCC(C)C#N		CCCCCCCCCCC(C)C#N	65644-60-2	2-Methyldodecanenitrile	195.35	132.871	-90.4204	Organic compounds	Organic nitrogen compounds	Organonitrogen compounds	Organic cyanides			1.60199	0.447071	2.55959	0.50959			0.88119	-0.47845	2.26233	0.551304
ADJYQFBOMQAMAI-UHFFFAOYSA-N	O=C1C2C(=CC=CC=2OC2C=CC=CC=2)C(=O)C2=CC=CC(OC3C=CC=CC=3)=C12		O=C1C2C(=CC=CC=2OC2C=CC=CC=2)C(=O)C2=CC=CC(OC3C=CC=CC=3)=C12	82-17-7	9,10-Anthracenedione, 1,8-diphenoxy-	392.41	-128.935	55.4187	Organic compounds	Benzenoids	Anthracenes	Anthraquinones			2.14861	0.667075	2.74534	0.672164			1.25767	-0.136258	2.58478	0.64505
ADKBGLXGTKOWIU-UHFFFAOYSA-N	OOC(=O)CCC(=O)OO		OOC(=O)CCC(=O)OO	2279-96-1	Butanediperoxoic acid	150.086	131.639	3.92674	Organic compounds	Organic acids and derivatives	Carboxylic acids and derivatives	Dicarboxylic acids and derivatives			1.84784	0.419298	2.5739	0.675758			1.57935	-0.0814587	2.79339	0.67803
ADKFZTIPPMZAKW-UHFFFAOYNA-L	[Na+].[Na+].CC(=O)C(=NNC1C=CC(=CC=1)C1=NC2=CC=C(C)C(=C2S1)S([O-])(=O)=O)C(=O)NC1=CC(C)=C(C=C1OC)S([O-])(=O)=O	[Na+]	CC(=O)C(N=NC1C=CC(=CC=1)C1=NC2C=CC(C)=C(C=2S1)S(O)(=O)=O)C(=O)NC1C=C(C)C(=CC=1OC)S(O)(=O)=O	72705-26-1	7-Benzothiazolesulfonic acid, 2-[4-[2-[1-[[(2-methoxy-5-methyl-4-sulfophenyl)amino]carbonyl]-2-oxopropyl]diazenyl]phenyl]-6-methyl-, sodium salt (1:2)	632.698	-160.078	28.9624	Organic compounds	Organic acids and derivatives	Carboxylic acids and derivatives	Amino acids, peptides, and analogues			2.27408	0.723099	2.8884	0.61035			2.11408	-0.0209648	3.17404	0.619803
ADKLJTCVZHUANG-UHFFFAOYSA-N	[O-][N+](O)=CS(=O)(=O)C1C=CC=CC=1		[O-][N+](O)=CS(=O)(=O)C1C=CC=CC=1	21272-85-5	((Nitromethyl)sulphonyl)benzene	201.203	-119.654	-42.0733	Organic compounds	Benzenoids	Benzene and substituted derivatives	Benzenesulfonyl compounds			1.85881	-0.0179537	2.5805	0.646165			1.07864	-0.880356	2.54595	0.646165
ADKMKHLPHXUNRA-UHFFFAOYSA-N	O=c1c(N=O)c([nH][n]1C1C=CC=CC=1)C1C=CC=CC=1		O=c1c(N=O)c([nH][n]1C1C=CC=CC=1)C1C=CC=CC=1	62349-51-3	4-nitroso-2,5-diphenyl-1H-pyrazol-3-one	265.272	-173.08	21.8304	Organic compounds	Organoheterocyclic compounds	Azoles	Pyrazoles			1.78703	0.269693	2.49435	0.614271			1.0865	-0.315934	2.30713	0.720524
ADKVLNPBXBXIJO-UHFFFAOYSA-K	[Cr+3].[O-]C(=O)C(F)(F)C(F)(F)C(F)(F)C(F)(F)C(F)(F)C(F)(F)C(F)(F)F.[O-]C(=O)C(F)(F)C(F)(F)C(F)(F)C(F)(F)C(F)(F)C(F)(F)C(F)(F)F.[O-]C(=O)C(F)(F)C(F)(F)C(F)(F)C(F)(F)C(F)(F)C(F)(F)C(F)(F)F	[Cr+3]	OC(=O)C(F)(F)C(F)(F)C(F)(F)C(F)(F)C(F)(F)C(F)(F)C(F)(F)F	68141-02-6	Chromium(3+) perfluorooctanoate (1:3)	414.064	4.51354	-132.434	Organic compounds	Organohalogen compounds	Alkyl halides	Alkyl fluorides			-0.48572	-1.01703	2.35295	0.234308			0.732279	-0.877555	1.57461	0.278752
ADKWBMCELSRNFK-UHFFFAOYSA-N	OC(=O)C1=CC=CC=C1N1C2=CC=CC=C2C2=CC=CC=C12		OC(=O)C1=CC=CC=C1N1C2=CC=CC=C2C2=CC=CC=C12	6286-88-0	2-(9h-carbazol-9-yl)benzoic acid	287.318	-59.0591	-15.1789	Organic compounds	Organoheterocyclic compounds	Indoles and derivatives	Carbazoles			1.8127	0.333315	2.50121	0.545224			1.3772	-0.196693	2.61058	0.541012
ADKXZIOQKHHDNQ-MRVPVSSYSA-N	CC(=O)CC1CCCN1C		CC(=O)CC1CCCN1C	496-49-1	1-(1-Methyl-2-pyrrolidinyl)-2-propanone	141.214	64.1218	41.9048	Organic compounds	Alkaloids and derivatives					1.68945	0.523055	2.38514	0.744728			0.875986	-0.554045	2.0901	0.746868
ADLFUPFRVXCDMO-LIGXYSTNSA-M	[Na+].CON=C(C1=CSC(N)=N1)C(=O)NC1C2SCC=C(C([O-])=O)N2C1=O	[Na+]	CON=C(C1=CSC(N)=N1)C(=O)NC1C2SCC=C(C(O)=O)N2C1=O	68401-82-1	Ceftizoxime sodium	383.411	48.8514	110.573	Organic compounds	Organic acids and derivatives	Carboxylic acids and derivatives	Amino acids, peptides, and analogues			1.91742	-0.201085	2.6572	0.79929			1.62392	-0.3575	3.10267	0.772129
ADLPVBCBMDDLJK-UHFFFAOYSA-N	NCCNCCNCCNCCN.OC(=O)CCCCC(O)=O	OC(CCCCC(=O)O)=O	NCCNCCNCCNCCN	94135-63-4	["Hexanedioic acid--N~1~,N~1'~-[azanediyldi(ethane-2,1-diyl)]di(ethane-1,2-diamine) (1/1)"]	189.307	73.0881	-45.4959	Organic compounds	Lipids and lipid-like molecules	Fatty Acyls	Fatty acids and conjugates			1.5958	0.156688	2.45142	0.326515			1.38367	0.0309802	2.45245	0.34483
ADLSSRLDGACTEX-UHFFFAOYSA-N	C1=CC=CC=C1O[Si](OC1C=CC=CC=1)(OC1C=CC=CC=1)OC1C=CC=CC=1		C1=CC=CC=C1O[Si](OC1C=CC=CC=1)(OC1C=CC=CC=1)OC1C=CC=CC=1	1174-72-7	Tetraphenoxysilane	400.506	-64.3653	-90.6949	Organic compounds	Benzenoids	Benzene and substituted derivatives	Phenoxy compounds			1.73241	0.0163794	2.61298	0.593789			0.997227	-2.85423	2.60091	0.591533
ADLWOFHKMXUDKF-UHFFFAOYSA-N	Cc1[nH]c(N)[n]c(=O)c1Br		Cc1[nH]c(N)[n]c(=O)c1Br	6307-35-3	2-Amino-5-bromo-6-methyl-4-pyrimidinol	204.027	-12.9327	31.8465	Organic compounds	Organoheterocyclic compounds	Diazines	Pyrimidines and pyrimidine derivatives			0.871857	-0.625016	2.28544	0.775647			0.780323	-0.5297	2.09868	0.752357
ADLWTVQIBZEAGJ-UHFFFAOYSA-N	CCO[Si](C)(C1C=CC=CC=1)C1C=CC=CC=1		CCO[Si](C)(C1C=CC=CC=1)C1C=CC=CC=1	1825-59-8	Ethoxy(methyl)diphenylsilane	242.394	-66.877	-89.6761	Organic compounds	Organometallic compounds	Organometalloid compounds	Organosilicon compounds			1.51164	-0.344618	2.40665	0.518377			1.03403	-0.381448	2.38075	0.658052
ADLXTJMPCFOTOO-UHFFFAOYSA-N	CCCCCCC=CC(O)=O		CCCCCCC=CC(O)=O	3760-11-0	2-Nonenoic acid	156.225	96.8329	-37.3602	Organic compounds	Lipids and lipid-like molecules	Fatty Acyls	Fatty acids and conjugates			1.89049	0.707592	2.58719	0.470868			1.58527	0.412588	2.73704	0.464227
ADMHKTPSKNRFQM-UHFFFAOYSA-N	O=C(CS)CC1=CNC2=CC=C(Br)C=C21		O=C(CS)CC1=CNC2=CC=C(Br)C=C21	919296-23-4	1-(5-Bromo-1H-indol-3-yl)-3-sulfanylpropan-2-one	284.178	-49.7174	121.675	Organic compounds	Organoheterocyclic compounds	Indoles and derivatives	Indoles			1.16155	-0.73923	2.42652	0.787132			0.762774	-0.555867	2.07011	0.729403
ADMXOBZMMQYVKF-UHFFFAOYSA-J	[Cl-].[Cl-].[Cl-].[Cl-].[Zn+2].CCN(CC)C1=CC2=[O+]C3=CC(=CC=C3N=C2C=C1)N(CC)CC.CCN(CC)C1=CC2=[O+]C3=CC(=CC=C3N=C2C=C1)N(CC)CC	[Cl-].[Zn+2]	CCN(CC)c1cc2oc3cc(ccc3[n]c2cc1)N(CC)CC	63589-47-9	3,7-Bis(diethylamino)phenoxazin-5-ium tetrachlorozincate (2:1)	324.448	-132.177	-75.4106	Organic compounds	Organoheterocyclic compounds	Benzoxazines	Phenoxazines	2.23655		1.82194	0.162226	2.57794	0.617588			1.05445	-0.26803	2.6593	0.79212
ADNABQGXTLLQSS-RGDBMKNVNA-N	CC1(O)CCC2CC(=C)CCCC(=O)C3(CCC(C)CN)CCC(C4CC(C)C(=O)O4)=C(C)C3C=C(C)C(O)CC3OC4(CC3C)CCC1(O4)O2		CC1(O)CCC2CC(=C)CCCC(=O)C3(CCC(C)CN)CCC(C4CC(C)C(=O)O4)=C(C)C3C=C(C)C(O)CC3OC4(CC3C)CCC1(O4)O2	NOCAS_1022182	Spirolide F	711.981	78.4958	115.292	Organic compounds	Organic oxygen compounds	Organooxygen compounds	Ethers			1.4612	-0.415914	2.75153	0.821761			0.316851	-1.46879	2.62635	0.817636
ADNADZOSMJDVIS-UHFFFAOYSA-N	CCCCC(=O)OCC(C)C		CCCCC(=O)OCC(C)C	10588-10-0	Pentanoic acid, 2-methylpropyl ester	158.241	132.13	-29.2679	Organic compounds	Lipids and lipid-like molecules	Fatty Acyls	Fatty acid esters			2.12724	1.35694	2.66757	0.420968			1.81266	0.943616	2.70877	0.444318
ADNQKFLRLADIEU-UHFFFAOYSA-N	C=CCCCCCC1CCC(=O)O1		C=CCCCCCC1CCC(=O)O1	854737-08-9	2(3H)-Furanone, 5-(6-hepten-1-yl)dihydro-	182.263	123.13	30.0472	Organic compounds	Organoheterocyclic compounds	Lactones	Gamma butyrolactones			2.00571	0.996732	2.59989	0.489412			1.55246	0.22888	2.38801	0.525707
ADNTYWWZEZOGFS-UHFFFAOYSA-N	COC(=O)C1NN=NC=1C1C=CC=CC=1		COC(=O)C1NN=NC=1C1C=CC=CC=1	6451-84-9	ST51035881	203.201	-62.7873	37.2213	Organic compounds	Organoheterocyclic compounds	Azoles	Triazoles			1.71132	0.226187	2.6146	0.644452			1.06073	-0.353383	2.52031	0.623737
ADNZGUWUCCPQCV-YFKPBYRVSA-N	NC(CCCCN)C(=O)O[SiH2]C(O)O		NC(CCCCN)C(=O)O[SiH2]C(O)O	190270-74-7	L-Lysine, dihydroxymethylsilyl ester	222.317	37.4989	-58.4742	Organic compounds	Organic acids and derivatives	Carboxylic acids and derivatives	Amino acids, peptides, and analogues			1.8649	0.374567	2.66521	0.742395			1.69807	-0.1313	2.99601	0.646792
ADNZLHSXIAPURS-UHFFFAOYSA-N	OC1C=CC(=CC=1)C(=O)C1=CC=CC=N1		OC1C=CC(=CC=1)C(=O)C1=CC=CC=N1	33077-70-2	Ketone, (p-hydroxyphenyl) 2-pyridyl	199.209	-41.8646	-13.7178	Organic compounds	Organic oxygen compounds	Organooxygen compounds	Carbonyl compounds			1.78259	0.316406	2.44978	0.625542			1.25394	-0.131476	2.46448	0.60804
ADOBXTDBFNCOBN-UHFFFAOYSA-N	CCCCCCCCCCCCCCCC=C		CCCCCCCCCCCCCCCC=C	6765-39-5	1-\u200bHeptadecene	238.459	144.092	-82.4424	Organic compounds	Hydrocarbons	Unsaturated hydrocarbons	Unsaturated aliphatic hydrocarbons			2.3425	1.54342	2.84945	0			1.90719	0.985134	2.56178	0
ADODRSVGNHNKAT-UHFFFAOYSA-N	Cl.NNC1=CC=CC=C1Cl	Cl	NNC1=CC=CC=C1Cl	41052-75-9	(2-Chlorophenyl)hydrazine--hydrogen chloride (1/1)	142.589	-90.8773	-33.8116	Organic compounds	Benzenoids	Benzene and substituted derivatives	Phenylhydrazines			0.96985	-0.88294	3.97234	0.60923			0.681902	-0.628593	1.80939	0.580924
ADOHASQZJSJZBT-SANMLTNESA-N	CC(C)(C)OC(=O)N1C=C(CC(NC(=O)OCC2C3=CC=CC=C3C3=CC=CC=C32)C(O)=O)C2=CC=CC=C12		CC(C)(C)OC(=O)N1C=C(CC(NC(=O)OCC2C3=CC=CC=C3C3=CC=CC=C32)C(O)=O)C2=CC=CC=C12	143824-78-6	Fmoc-Trp(Boc)-OH	526.589	20.5383	-37.6667	Organic compounds	Benzenoids	Fluorenes				2.13808	0.18333	2.73585	0.737524			1.36494	-0.557297	2.62699	0.756386
ADOJVBUVXRZBHE-UHFFFAOYSA-N	Cc1[nH]c(=S)[nH]c(=O)c1CCO		Cc1[nH]c(=S)[nH]c(=O)c1CCO	21585-16-0	2,3-Dihydro-5-(2-hydroxyethyl)-6-methyl-2-thioxo-1H-pyrimidin-4-one	186.236	-8.88048	22.6691	Organic compounds	Organoheterocyclic compounds	Diazines	Pyrimidines and pyrimidine derivatives			0.82991	-0.516845	2.22774	0.774254			0.813951	-0.561724	2.16421	0.799541
ADOQBZAVKYCFOI-HWKANZROSA-N	CC=CCCCCCCCCC		CC=CCCCCCCCCC	7206-13-5	(2E)-2-Dodecene	168.324	143.286	-72.0388	Organic compounds	Hydrocarbons	Unsaturated hydrocarbons	Unsaturated aliphatic hydrocarbons			2.27709	1.27563	2.71448	0.168721			1.79537	0.972014	2.45496	0.174072
ADOQBZAVKYCFOI-HYXAFXHYSA-N	CC=CCCCCCCCCC		CC=CCCCCCCCCC	7206-26-0	(2Z)-dodec-2-ene	168.324	143.285	-72.0382	Organic compounds	Hydrocarbons	Unsaturated hydrocarbons	Unsaturated aliphatic hydrocarbons			2.27709	1.27563	2.71448	0.168721			1.79537	0.972014	2.45496	0.174072
ADOVMKXWNWCKIX-UHFFFAOYSA-N	NC1C=CC(=CC=1)C1C=C(C(=O)NN)C2=CC(Br)=CC=C2N=1		NC1C=CC(=CC=1)C1C=C(C(=O)NN)C2=CC(Br)=CC=C2N=1	5350-87-8	2-(4-aminophenyl)-6-bromoquinoline-4-carbohydrazide	357.211	-75.6439	43.7326	Organic compounds	Organoheterocyclic compounds	Quinolines and derivatives	Phenylquinolines			1.10522	-2.64586	2.51376	0.770779			0.901322	-0.64445	2.33268	0.776209
ADPBHYYCECQFTN-UHFFFAOYSA-K	[Sb+3].NC(=O)C[S-].NC(=O)C[S-].NC(=O)C[S-]	[Sb+3]	NC(=O)CS	6533-78-4	Antimony thioglycollamide	91.135	73.3028	-57.2772	Organic compounds	Organic acids and derivatives	Carboxylic acids and derivatives	Carboxylic acid derivatives			0.763498	-0.813823	2.35546	0.57381			0.482595	-0.718792	1.75261	0.541111
ADPMHRDERZTFIN-UHFFFAOYSA-N	Br.NC1=NCC2C3=CC=CC=C3CC3=CC=CC=C3N12	Br	NC1=NCC2C3=CC=CC=C3CC3=CC=CC=C3N12	80012-42-6	1,2,9,13b-Tetrahydro-3H-dibenzo[c,f]imidazo[1,5-a]azepin-3-imine--hydrogen bromide (1/1)	249.317	-15.716	81.7694	Organic compounds	Organoheterocyclic compounds	Benzazepines	Dibenzazepines			1.1643	-2.20015	2.23901	0.797617			0.753647	-0.873069	2.19471	0.787894
ADPUQRRLAAPXGT-UHFFFAOYSA-M	[Na+].[O-]S(=O)(=O)C1=CC=CC=C1C=O	[Na+]	OS(=O)(=O)C1C=CC=CC=1C=O	1008-72-6	Sodium 2-formylbenzenesulfonate	186.188	-135.778	-20.3587	Organic compounds	Benzenoids	Benzene and substituted derivatives	Benzenesulfonic acids and derivatives			1.93257	0.831611	2.61579	0.575085			1.65382	0.112692	2.52523	0.595807
ADPXJENOKRHJCX-UHFFFAOYSA-N	CCCCCCCCCCCCCCOC1N=C(Cl)N=C(Cl)N=1		CCCCCCCCCCCCCCOC1N=C(Cl)N=C(Cl)N=1	85665-57-2	2,4-Dichloro-6-(tetradecyloxy)-1,3,5-triazine	362.345	11.4602	-84.585	Organic compounds	Organoheterocyclic compounds	Triazines	1,3,5-triazines			1.2682	-0.265957	2.55641	0.64965			0.962177	-0.445478	2.3374	0.653571
ADQJFBQXLAAVQA-UHFFFAOYSA-N	CC1CCCC1CCC		CC1CCCC1CCC	932-44-5	1-Methyl-2-propylcyclopentane	126.243	115.472	42.3158	Organic compounds	Hydrocarbons	Saturated hydrocarbons	Cycloalkanes			1.98407	0.767596	2.50621	0.71913			1.19472	-0.147536	2.14589	0.753838
ADQOGAQFIJCUCU-UHFFFAOYSA-N	CC(NC(=O)C(C)Br)C(O)=O		CC(NC(=O)C(C)Br)C(O)=O	31654-38-3	N-(2-Bromo-1-hydroxypropylidene)alanine	224.054	46.7599	-54.5704	Organic compounds	Organic acids and derivatives	Carboxylic acids and derivatives	Amino acids, peptides, and analogues			1.10945	-0.894368	2.6198	0.675032			0.957185	-0.423471	2.32833	0.669502
ADQSSLSBOAKAMZ-UHFFFAOYSA-N	Cl.COC1C=C(C=CC=1)N1C(N)=NC(N)=NC1(C)C	Cl	COC1C=C(C=CC=1)N1C(N)=NC(N)=NC1(C)C	17399-10-9	GNF-Pf-4467	247.302	-122.021	89.7061	Organic compounds	Benzenoids	Benzene and substituted derivatives	Aniline and substituted anilines			1.386	-0.246109	2.33648	0.751967			0.863188	-0.713957	2.35219	0.717849
ADQZBWJHUFQOBT-UHFFFAOYSA-K	[Na+].[Na+].[Na+].[O-]S(=O)(=O)C1C=CC=C(C=1C([O-])=O)C([O-])=O	[Na+]	OS(=O)(=O)C1C=CC=C(C=1C(O)=O)C(O)=O	52642-40-7	Trisodium sulphonatophthalate	246.196	-68.3754	-16.1589	Organic compounds	Benzenoids	Benzene and substituted derivatives	Benzenesulfonic acids and derivatives			2.00609	0.758584	2.70716	0.591073			1.63565	-0.0876881	2.78743	0.59
ADRDEXBBJTUCND-UHFFFAOYSA-N	C1CCN2CCCC21		C1CCN2CCCC21	643-20-9	Pyrrolizidine	111.188	68.9609	45.4761	Organic compounds	Organoheterocyclic compounds	Pyrrolizidines				1.48759	0.0981385	2.31174	0.797895			0.75641	-0.735787	1.98602	0.797895
ADRLBSFJQOGKCV-UHFFFAOYSA-N	CCCSP(SCCC)SCCC		CCCSP(SCCC)SCCC	869-56-7	Phosphorotrithious acid, tripropyl ester	256.442	122.129	-114.635	Organic compounds	Organophosphorus compounds	Organothiophosphorus compounds				0.282113	-1.29911	2.17316	0.749095			-0.446264	-3.427	2.03326	0.749095
ADRQFDIWPRFKSP-UHFFFAOYSA-N	COC1C=CC(C=CC(=O)C2=CC=C(O)C=C2O)=CC=1		COC1C=CC(C=CC(=O)C2=CC=C(O)C=C2O)=CC=1	13351-10-5	2â€²,4â€²-Dihydroxy-4-methoxychalcone	270.284	-8.68114	-14.6981	Organic compounds	Phenylpropanoids and polyketides	Linear 1,3-diarylpropanoids	Chalcones and dihydrochalcones			1.9098	0.577199	2.54419	0.571108			1.42782	0.142892	2.5985	0.5799
ADRVTASORWAZLS-UHFFFAOYSA-L	[Ca+2].CC(C(=S)C(=S)C(C)C([O-])=O)C([O-])=O	[Ca+2]	CC(C(=S)C(=S)C(C)C(O)=O)C(O)=O	93776-78-4	Calcium 2,5-dimethyl-3,4-bis(sulfanylidene)hexanedioate	234.298	57.5193	-72.9654	Organic compounds	Lipids and lipid-like molecules	Fatty Acyls	Fatty acids and conjugates			1.32579	-0.554383	2.38267	0.603296			0.976968	-0.530093	2.32667	0.593389
ADRWUKNDQZKRCK-XGUBFFRZSA-N	CC(C)(C)[Si](C)(C)OC1CC2CC3(CC2C1CO)OCCO3		CC(C)(C)[Si](C)(C)OC1CC2CC3(CC2C1CO)OCCO3	96648-15-6	["(3'aalpha,4'alpha,5'beta,6'aalpha)-5'-(((tert-Butyl)dimethylsilyl)oxy)hexahydrospiro(1,3-dioxolane-2,2'(1'H)-pentalene)-4'-methanol"]	328.525	111.085	63.969	Organic compounds	Organic oxygen compounds	Organooxygen compounds	Ethers			1.8465	0.196444	2.58337	0.787511			0.874256	-1.90043	2.42467	0.824627
ADRYPAGQXFMVFP-UHFFFAOYSA-N	ClC1C=CC=C2C=CC=C(Cl)C=12		ClC1C=CC=C2C=CC=C(Cl)C=12	2050-74-0	1,8-Dichloronaphthalene	197.064	-104.225	34.5561	Organic compounds	Benzenoids	Naphthalenes	Chloronaphthalenes			1.33229	-0.727905	2.73379	0.610821			0.890679	-1.54969	2.00487	0.532468
ADRZQEOBUFIYAZ-LJQANCHMSA-N	COCCCS(=O)(=O)C1C=CC(=CC=1)C1=CC=C(CCN2CCCC2C)C=C1		COCCCS(=O)(=O)C1C=CC(=CC=1)C1=CC=C(CCN2CCCC2C)C=C1	1021169-11-8	ADP-916	401.572	30.8913	34.1981	Organic compounds	Benzenoids	Benzene and substituted derivatives	Biphenyls and derivatives			1.57679	0.120991	2.5053	0.743714			0.83904	-0.515126	2.36776	0.776426
ADSALMJPJUKESW-RXMQYKEDSA-N	OC(=O)CC1CCCN1		OC(=O)CC1CCCN1	61350-65-0	(R)-homoproline	129.159	85.6496	36.2664	Organic compounds	Organoheterocyclic compounds	Pyrrolidines				1.91185	0.498411	2.50908	0.761863			1.82349	0.389654	3.0786	0.711956
ADSALMJPJUKESW-UHFFFAOYSA-N	OC(=O)CC1CCCN1		OC(=O)CC1CCCN1	56879-46-0	(Pyrrolidin-2-yl)acetic acid	129.159	85.6496	36.2694	Organic compounds	Organoheterocyclic compounds	Pyrrolidines				1.91185	0.498411	2.50908	0.761863			1.82349	0.389654	3.0786	0.711956
ADSDVWOUCCEKDG-UHFFFAOYSA-N	CCOP(=O)(OCC)C(CC(F)(F)C(F)(F)C(F)(F)C(F)(F)C(F)(F)C(F)(F)C(F)(F)F)CC(I)P(=O)(OCC)OCC		CCOP(=O)(OCC)C(CC(F)(F)C(F)(F)C(F)(F)C(F)(F)C(F)(F)C(F)(F)C(F)(F)F)CC(I)P(=O)(OCC)OCC	23144-30-1	9,11-bis(diethoxyphosphoryl)-1,1,1,2,2,3,3,4,4,5,5,6,6,7,7-pentadecafluoro-11-iodoundecane	824.233	16.0721	-168.355	Organic compounds	Organic acids and derivatives	Organic phosphonic acids and derivatives	Phosphonic acid diesters			0.990322	-0.878773	2.5558	0.723739			0.191265	-2.40142	2.38564	0.723739
ADSJBLXBDQWPHY-UHFFFAOYSA-N	OC(=O)CCC(=O)N1CCCC1		OC(=O)CCC(=O)N1CCCC1	69338-35-8	4-Oxo-4-(pyrrolidin-1-yl)butanoic acid	171.196	64.3651	32.4337	Organic compounds	Organoheterocyclic compounds	Pyrrolidines	N-acylpyrrolidines			1.84236	0.613372	2.51452	0.664065			1.2607	0.0363651	2.60697	0.659467
ADSJIDIMDOQATJ-UHFFFAOYSA-N	CCN(CC)C(=O)C1C=CC(=CC=1)C(=O)C1C=CC=CC=1		CCN(CC)C(=O)C1C=CC(=CC=1)C(=O)C1C=CC=CC=1	67055-76-9	N,N-Diethyl4-benzoylbenzamide	281.355	-41.0327	-39.6442	Organic compounds	Benzenoids	Benzene and substituted derivatives	Benzophenones			1.77811	0.654325	2.51788	0.53129			1.05484	-0.223294	2.31476	0.53694
ADSKDYCFRLKFDJ-UHFFFAOYSA-N	CC(=C)C(=O)OCCN(C)S(=O)(=O)C(F)(F)C(F)(F)C(F)(F)C(F)(F)C(F)(F)F		CC(=C)C(=O)OCCN(C)S(=O)(=O)C(F)(F)C(F)(F)C(F)(F)C(F)(F)C(F)(F)F	67584-60-5	2-(Methyl((undecafluoropentyl)sulfonyl)amino)ethyl methacrylate	475.276	-8.72478	-161.918	Organic compounds	Organic acids and derivatives	Organic sulfonic acids and derivatives	Organosulfonic acids and derivatives			1.30239	-0.913348	2.49839	0.514127			0.150238	-1.52298	2.0531	0.518962
ADSOSINJPNKUJK-UHFFFAOYSA-N	CCCCC1=CC=CC=N1		CCCCC1=CC=CC=N1	5058-19-5	2-Butylpyridine	135.21	-35.6122	-8.17834	Organic compounds	Organoheterocyclic compounds	Pyridines and derivatives				1.3873	-0.541423	2.149	0.627012			0.568739	-0.627899	1.92758	0.651961
ADSVMOOPQPIGEI-UHFFFAOYSA-N	CCCCCCCCCCCCCCCC(=O)NC1C=CC(=CC=1)c1[nH][n](C2C=C(C=CC=2)S(O)(=O)=O)c(=O)c1CCC#N		CCCCCCCCCCCCCCCC(=O)NC1C=CC(=CC=1)c1[nH][n](C2C=C(C=CC=2)S(O)(=O)=O)c(=O)c1CCC#N	94944-74-8	3-{4-(2-Cyanoethyl)-3-[4-(hexadecanoylamino)phenyl]-5-oxo-4,5-dihydro-1H-pyrazol-1-yl}benzene-1-sulfonic acid	622.832	-32.1608	-110.739	Organic compounds	Benzenoids	Benzene and substituted derivatives	Benzenesulfonic acids and derivatives			2.17555	0.476168	2.81309	0.699172			1.70187	0.024879	2.75449	0.739146
ADSZGMHJUZRRGR-UHFFFAOYSA-M	[Na+].CCCCCCCCCC(CCCCCCCC(=O)OCCC)S([O-])(=O)=O	[Na+]	CCCCCCCCCC(CCCCCCCC(=O)OCCC)S(O)(=O)=O	68425-62-7	Sodium 1-oxo-1-propoxyoctadecane-9-sulfonate	406.629	126.49	-35.517	Organic compounds	Lipids and lipid-like molecules	Fatty Acyls	Fatty acid esters			2.19428	1.08892	2.82919	0.41638			1.79114	0.317276	2.85475	0.440879
ADSZIGUFCCRNIO-DUXPYHPUSA-N	OC(=O)C=NC(=O)CCC1C=C(O)C(O)=CC=1		OC(=O)C=NC(=O)CCC1C=C(O)C(O)=CC=1	70120-43-3	N-Caffeoylglycine	237.211	-7.60684	-36.183	Organic compounds	Organic acids and derivatives	Carboxylic acids and derivatives	Amino acids, peptides, and analogues			1.95289	0.711234	2.68843	0.704188			1.57588	-0.230075	2.61846	0.66227
ADSZMMXDLQQAOC-UHFFFAOYSA-N	CCOC1=CC=CC=C1C(O)C1=CC(=O)C2=CC=CC=C2C1=O		CCOC1=CC=CC=C1C(O)C1=CC(=O)C2=CC=CC=C2C1=O	6629-17-0	MLS002667945	308.333	-52.3827	64.9208	Organic compounds	Benzenoids	Naphthalenes	Naphthoquinones			1.84538	0.180039	2.64608	0.700312			1.23538	-1.31573	2.52533	0.706004
ADTDBAKUQAKBGZ-VXJIXCKJSA-N	[O-][N+]12CC3=CCOC4CC(=O)N5C6C4C3CC1C6(CC2)C1=CC=CC=C51		[O-][N+]12CC3=CCOC4CC(=O)N5C6C4C3CC1C6(CC2)C1=CC=CC=C51	7248-28-4	7-Oxo-6,7,7a,8,8a,11,12a,12b,12c,13-decahydro-5H,14H-7,9-methano-12-oxa-7lambda~5~,14a-diazacyclohepta[1,2,3-cd]cyclopenta[g]fluoranthen-14-one	350.418	-26.5107	154.834	Organic compounds	Alkaloids and derivatives	Strychnos alkaloids				1.15856	-3.35284	2.51053	0.82294			0.08446	-3.34961	2.31797	0.736493
ADTDLWOIUYJQNC-UHFFFAOYSA-N	CCCCC=CC=CC=C		CCCCC=CC=CC=C	96444-01-8	Decatriene	136.238	145.064	-69.7073	Organic compounds	Hydrocarbons	Unsaturated hydrocarbons	Olefins			1.70847	0.513189	2.51892	0.570194			1.56379	0.472542	2.29136	0.570194
ADTFWMSGAIHAFN-UHFFFAOYSA-N	CCC(C(B(C(C)C)C(C)C)C(C)C)C(C)C		CCC(C(B(C(C)C)C(C)C)C(C)C)C(C)C	74792-79-3	borane, [1,2-bis(1-methylethyl)butyl]bis(1-methylethyl)-	238.268	121.065	-97.2178	Organic compounds	Organometallic compounds	Organometalloid compounds	Organoboron compounds			1.95746	0.43166	2.68031	0.774371			1.10999	-3.98092	2.29384	0.791103
ADTGIGSPQHDPLT-UHFFFAOYSA-M	[Na+].CC(C([O-])=O)C1C=CC(=CC=1)C(=O)C1=CC=CS1	[Na+]	CC(C(O)=O)C1C=CC(=CC=1)C(=O)C1=CC=CS1	52779-97-2	Sodium 2-[4-(thiophene-2-carbonyl)phenyl]propanoate	260.314	-38.8749	-22.5116	Organic compounds	Organic oxygen compounds	Organooxygen compounds	Carbonyl compounds			1.52467	0.00340843	2.49886	0.719176			0.983619	-0.365308	2.36435	0.721066
ADTGMKALEWQTBT-UHFFFAOYSA-N	OCCN1CCN(CC1)C1=CC=NC=C1S(=O)(=O)N1CCCCC1		OCCN1CCN(CC1)C1=CC=NC=C1S(=O)(=O)N1CCCCC1	57725-35-6	AJ-333/25006282	354.476	-10.9221	56.6243	Organic compounds	Organoheterocyclic compounds	Diazinanes	Piperazines			1.49797	0.0904696	2.46714	0.757544			0.96159	-0.417048	2.3511	0.779791
ADTJGIMHXSBSPS-UHFFFAOYSA-N	Cl.NNC1C(Cl)=CC(Cl)=CC=1Cl	Cl	NNC1C(Cl)=CC(Cl)=CC=1Cl	2724-66-5	(2,4,6-Trichlorophenyl)hydrazine monohydrochloride	211.479	-97.162	-1.018	Organic compounds	Benzenoids	Benzene and substituted derivatives	Phenylhydrazines			0.798868	-0.778148	2.2756	0.639988			0.296845	-3.43651	1.96553	0.628682
ADTJPOBHAXXXFS-UHFFFAOYSA-N	CN(C)CCCNC(=O)C=C		CN(C)CCCNC(=O)C=C	3845-76-9	2-Propenamide, N-[3-(dimethylamino)propyl]-	156.229	63.4931	-41.432	Organic compounds	Organic acids and derivatives	Carboxylic acids and derivatives	Acrylic acids and derivatives			1.52118	-0.314626	2.27941	0.473995			1.37801	-0.103318	2.34074	0.488043
ADTKEYLCJYYHHH-UHFFFAOYSA-N	[O-][N+](=O)C1=CC(=C(Cl)C(=C1)C(O)=O)[N+]([O-])=O		[O-][N+](=O)C1=CC(=C(Cl)C(=C1)C(O)=O)[N+]([O-])=O	2497-91-8	2-Carboxy-4,6-dinitrochlorobenzene	246.562	-141.514	12.4348	Organic compounds	Benzenoids	Benzene and substituted derivatives	Benzoic acids and derivatives			1.90841	-0.16383	2.78487	0.59431			0.77556	-0.760431	2.28261	0.576512
ADTLXEWUZWPMFV-XDKWHASVSA-N	CC1(C)C2CCC1(C)C(F)(F)OC2(F)F		CC1(C)C2CCC1(C)C(F)(F)OC2(F)F	193280-14-7	(1S)-2,2,4,4-Tetrafluoro-1,8,8-trimethyl-3-oxabicyclo[3.2.1]octane	226.213	110.394	83.7871	Organic compounds	Organoheterocyclic compounds	Oxepanes				1.39228	-1.20597	2.51698	0.788735			0.58395	-2.06357	2.23957	0.785445
ADUIJCCNUGTGDH-UHFFFAOYSA-N	CCCN(CCCl)CCOC(=O)C(O)(C1C=CC=CC=1)C1C=CC=CC=1		CCCN(CCCl)CCOC(=O)C(O)(C1C=CC=CC=1)C1C=CC=CC=1	36167-80-3	Propylbenzilylcholine mustard	375.896	-14.6728	-68.6173	Organic compounds	Benzenoids	Benzene and substituted derivatives	Diphenylmethanes			1.11584	-0.414065	2.3932	0.689649			0.81691	-0.417749	2.4703	0.668855
ADUKCCWBEDSMEB-LDGXTIHJNA-N	CC(C)NCC(O)COC1=CC=C(O)C=C1		CC(C)NCC(O)COC1=CC=C(O)C=C1	57526-81-5	Prenalterol	225.288	-2.33408	-104.008	Organic compounds	Benzenoids	Phenols	4-alkoxyphenols			1.72318	-0.636911	2.50354	0.619613			1.65238	-0.000728647	2.84331	0.666991
ADUMIBSPEHFSLA-UHFFFAOYSA-N	NC1C=CC(=CC=1)C(C1C=CC(N)=CC=1)C1C=CC(N)=CC=1		NC1C=CC(=CC=1)C(C1C=CC(N)=CC=1)C1C=CC(N)=CC=1	548-61-8	["Benzeneamine, 4,4',4''-methylidynetris- (9CI)"]	289.382	-56.5796	-51.261	Organic compounds	Benzenoids	Triphenyl compounds				1.40385	-0.0838762	2.39187	0.522344			0.717481	-0.47695	2.24754	0.543176
ADUODNZKKNUWBZ-UHFFFAOYSA-N	OC1C=CC(=CC=1)C(=O)C1C=CC(=CC=1)C(=O)C1C=CC(O)=CC=1		OC1C=CC(=CC=1)C(=O)C1C=CC(=CC=1)C(=O)C1C=CC(O)=CC=1	15517-46-1	MLS000758486	318.328	-46.5034	-35.341	Organic compounds	Benzenoids	Benzene and substituted derivatives	Benzophenones			1.98548	-0.655157	2.67169	0.437407			1.64597	0.0740371	2.74242	0.46807
ADUUDJKUUDLKRM-UHFFFAOYSA-M	CC[N+]1CCCC=1C.[O-][Cl+3]([O-])([O-])[O-]	[O-][Cl+3]([O-])([O-])[O-]	CC[N+]1CCCC=1C	67990-15-2	2H-Pyrrolium, 1-ethyl-3,4-dihydro-5-methyl-, perchlorate	112.196	44.626	24.2094	Organic compounds	Organic oxygen compounds	Organic oxoanionic compounds	Organic perchlorates			1.58193	0.167854	2.36863	0.797295			0.755559	-1.35398	2.20623	0.795933
ADUVQDXZSJUGJY-UHFFFAOYSA-N	COC(=O)CC(=N)C(F)(F)C(F)(F)C(F)(F)F		COC(=O)CC(=N)C(F)(F)C(F)(F)C(F)(F)F	106203-17-2	Methyl 3-amino-4,4,5,5,6,6,6-heptafluoro-2-hexenoate	269.116	0.231673	-135.218	Organic compounds	Lipids and lipid-like molecules	Fatty Acyls	Fatty acid esters			1.37736	-0.694081	2.45013	0.63754			0.647601	-1.5435	2.08906	0.653219
ADUXQWIKSOSSDH-UHFFFAOYSA-N	C[n]1c(=O)c2[nH]c(CNC3C=CC(=CC=3)C(O)=O)[n]c2[n](C)c1=O		C[n]1c(=O)c2[nH]c(CNC3C=CC(=CC=3)C(O)=O)[n]c2[n](C)c1=O	7000-61-5	MLS000737094	329.316	13.5176	102.389	Organic compounds	Organoheterocyclic compounds	Imidazopyrimidines	Purines and purine derivatives			2.08398	0.408086	2.82577	0.721357			1.41918	-0.141333	2.91365	0.718953
ADVANMXLTWBUFC-UHFFFAOYSA-N	S=c1[nH][n]c(NC2C=CC=CC=2)[n]1C1C=CC=CC=1		S=c1[nH][n]c(NC2C=CC=CC=2)[n]1C1C=CC=CC=1	14132-84-4	3H-1,2,4-Triazole-3-thione, 2,4-dihydro-4-phenyl-5-(phenylamino)-	268.345	-48.216	41.6718	Organic compounds	Organoheterocyclic compounds	Azoles	Triazoles			1.09563	-0.340456	2.20166	0.687286			0.779158	-0.470813	2.01789	0.707292
ADVCGXWUUOVPPB-XLPZGREQSA-N	Cc1c[n](C2CC(N)C(CO)O2)c(=O)[nH]c1=O		Cc1c[n](C2CC(N)C(CO)O2)c(=O)[nH]c1=O	52450-18-7	1-(3-Amino-2,3-dideoxypentofuranosyl)-4-hydroxy-5-methylpyrimidin-2(1H)-one	241.247	46.3121	135.243	Organic compounds	Nucleosides, nucleotides, and analogues	Pyrimidine nucleosides	Pyrimidine 2',3'-dideoxyribonucleosides			1.90959	0.214174	2.65557	0.693687			1.21226	-0.402458	2.55836	0.699857
ADVGKWPZRIDURE-UHFFFAOYSA-N	CC(=O)NC1=CC=CC=C1O		CC(=O)NC1=CC=CC=C1O	614-80-2	2-Hydroxyacetanilide	151.165	-87.3892	-38.9612	Organic compounds	Benzenoids	Benzene and substituted derivatives	Anilides			1.76964	0.56593	2.49343	0.579602			1.41688	0.167408	2.25869	0.59276
ADVJDPHBXVNOPS-UHFFFAOYSA-N	O=C(CSC(=S)N1CCCCC1)C1C=CC=CC=1		O=C(CSC(=S)N1CCCCC1)C1C=CC=CC=1	24372-60-9	NSC292693	279.43	9.35962	42.654	Organic compounds	Organic oxygen compounds	Organooxygen compounds	Carbonyl compounds			0.938041	-0.311203	2.14362	0.648807			0.662337	-0.34352	1.88233	0.670428
ADVNPUHITOJNRW-UHFFFAOYSA-N	CCOC(=O)C1CCCCCC1		CCOC(=O)C1CCCCCC1	32777-26-7	Ethyl cycloheptanecarboxylate	170.252	93.9439	28.0172	Organic compounds	Organic acids and derivatives	Carboxylic acids and derivatives	Carboxylic acid derivatives			2.06892	1.19858	2.59738	0.509487			1.47341	0.20689	2.56128	0.63747
ADVNUIUADIXWMI-OLZOCXBDSA-N	CC(C)(C)C1=CC(=CC(=C1O)C(C)(C)C)SC(C)C(C)OCC(O)=O		CC(C)(C)C1=CC(=CC(=C1O)C(C)(C)C)SC(C)C(C)OCC(O)=O	135133-84-5	({3-[(3,5-Di-tert-butyl-4-hydroxyphenyl)sulfanyl]butan-2-yl}oxy)acetic acid	368.539	16.4644	-13.4369	Organic compounds	Benzenoids	Benzene and substituted derivatives	Phenylpropanes			1.35377	-0.360241	2.62936	0.642613			0.877632	-1.16745	2.36568	0.648521
ADVPTQAUNPRNPO-REOHCLBHSA-N	NC(CS(O)=O)C(O)=O		NC(CS(O)=O)C(O)=O	1115-65-7	L-Cysteinesulfinic acid	153.159	36.0379	-66.0828	Organic compounds	Organic acids and derivatives	Carboxylic acids and derivatives	Amino acids, peptides, and analogues			1.77845	0.448908	2.55839	0.604498			1.38998	-0.418591	2.83168	0.551784
ADVPTQAUNPRNPO-UWTATZPHSA-N	NC(CS(O)=O)C(O)=O		NC(CS(O)=O)C(O)=O	35554-99-5	3-Sulfino-D-alanine	153.159	36.038	-66.0837	Organic compounds	Organic acids and derivatives	Carboxylic acids and derivatives	Amino acids, peptides, and analogues			1.77845	0.448908	2.55839	0.604498			1.38998	-0.418591	2.83168	0.551784
ADVPVYMCDBPSTD-UHFFFAOYSA-N	CC1CC2C(=O)CCC=2C2=CC=C3C=CC=CC3=C21		CC1CC2C(=O)CCC=2C2=CC=C3C=CC=CC3=C21	27343-48-2	11-Methylgona-1(10),2,4,6,8,13-hexaen-17-one	248.325	-115.228	45.1618	Organic compounds	Lipids and lipid-like molecules	Steroids and steroid derivatives	Oxosteroids			1.2484	-2.72063	2.28568	0.741769			0.743008	-0.807671	2.12757	0.745693
ADWASFABXNYXBP-UHFFFAOYSA-N	NC1C2=C(C(Cl)=CC=1Cl)C(=O)C1C(C2=O)=C(N)C(Cl)=CC=1Cl		NC1C2=C(C(Cl)=CC=1Cl)C(=O)C1C(C2=O)=C(N)C(Cl)=CC=1Cl	83578-92-1	1,8-Diamino-2,4,5,7-tetrachloroanthracene-9,10-dione	376.026	-137.927	58.9277	Organic compounds	Benzenoids	Anthracenes	Anthraquinones			1.92365	-0.418219	2.81014	0.64064			0.641154	-4.34333	2.21286	0.628562
ADWDNOJZWIDEOT-UHFFFAOYSA-N	Br.C1=CC=CC=C1NC1C=CC=CC=1	Br	C1=CC=CC=C1NC1C=CC=CC=1	30910-47-5	N-Phenylaniline--hydrogen bromide (1/1)	169.227	-97.9398	-44.083	Organic compounds	Benzenoids	Benzene and substituted derivatives	Aniline and substituted anilines	1.05416		1.16656	0.305035	2.01816	0.275458	0.64459		0.619242	-0.40321	1.77468	0.36418
ADWLCJZOIHORGX-UHFFFAOYSA-N	CN(C)CC1=CC(CN(C)C)=C(O)C(CN(C)C)=C1.OC=O.OC=O.OC=O	OC=O	CN(C)CC1=CC(CN(C)C)=C(O)C(CN(C)C)=C1	85187-38-8	Formic acid, compound with 2,4,6-tris((dimethylamino)methyl)phenol(3:1)	265.401	-52.3256	-18.917	Organic compounds	Benzenoids	Benzene and substituted derivatives	Phenylmethylamines	1.0225		1.14696	0.0967336	2.18141	0.518705			0.965256	-0.346817	2.21007	0.68487
ADWNFGORSPBALY-UHFFFAOYSA-M	[Na+].CCCCCCCCCCCCN(C)CC([O-])=O	[Na+]	CCCCCCCCCCCCN(C)CC(O)=O	7631-98-3	Glycine, N-dodecyl-N-methyl-, sodium salt (1:1)	257.418	95.3932	-46.2113	Organic compounds	Organic acids and derivatives	Carboxylic acids and derivatives	Amino acids, peptides, and analogues			2.0257	0.822251	2.68985	0.471016			1.05896	-0.496027	2.46525	0.505137
ADWTYURAFSWNSU-UHFFFAOYSA-N	O=C1NCCN1CC1C=NC(Cl)=CC=1		O=C1NCCN1CC1C=NC(Cl)=CC=1	120868-66-8	Imidacloprid urea	211.652	17.9528	56.3616	Organic compounds	Organoheterocyclic compounds	Pyridines and derivatives	Halopyridines			0.874858	-0.440121	2.03409	0.606436			0.673672	-0.490072	1.98111	0.653245
ADXCVBRGGZXCAQ-CROYDMIESA-N	NC1=CC(=C(SCC(OC2OC(CO)C(O)C(O)C2O)C(O)=O)C(=C1NC1=NC=C(C=C1Cl)C(F)(F)F)[N+]([O-])=O)C(F)(F)F		NC1=CC(=C(SCC(OC2OC(CO)C(O)C(O)C2O)C(O)=O)C(=C1NC1=NC=C(C=C1Cl)C(F)(F)F)[N+]([O-])=O)C(F)(F)F	436807-76-0	3-{[4-Amino-3-{[3-chloro-5-(trifluoromethyl)-2-pyridinyl]amino}-2-nitro-6-(trifluoromethyl)phenyl]sulfanyl}-2-(beta-D-glucopyranosyloxy)propanoic acid	682.936	42.9026	164.06	Organic compounds	Lipids and lipid-like molecules	Fatty Acyls	Fatty acyl glycosides			1.89204	-0.521946	2.67514	0.71381			0.811687	-1.39165	2.78468	0.710748
ADXGNEYLLLSOAR-UHFFFAOYSA-N	CC1N=C(C)C2CCC(=O)N(CC3C=CC(=CC=3)C3=CC=CC=C3C3=NNN=N3)C=2N=1		CC1N=C(C)C2CCC(=O)N(CC3C=CC(=CC=3)C3=CC=CC=C3C3=NNN=N3)C=2N=1	145733-36-4	Tasosartan	411.469	-30.2303	37.3014	Organic compounds	Benzenoids	Benzene and substituted derivatives	Biphenyls and derivatives			1.7297	0.0307767	2.55427	0.77546			1.06195	-0.166163	2.47211	0.736987
ADXLBHULARLUSE-UHFFFAOYSA-N	C=CCOC(F)(F)C(F)C(F)(F)F		C=CCOC(F)(F)C(F)C(F)(F)F	59158-81-5	2H-Hexafluoropropyl allyl ether	208.101	31.2379	-147.565	Organic compounds	Organic oxygen compounds	Organooxygen compounds	Ethers			1.45311	-0.438899	2.50477	0.793861			0.735256	-1.45738	2.2869	0.777178
ADXLMDOKVQZCOI-UHFFFAOYSA-N	FC(F)(Cl)C(F)(Cl)C(F)(F)C(F)(Cl)C(F)(F)C(F)(Cl)C(F)(F)C(F)(Cl)C(F)(F)C(F)(Cl)Cl		FC(F)(Cl)C(F)(Cl)C(F)(F)C(F)(Cl)C(F)(F)C(F)(Cl)C(F)(F)C(F)(Cl)C(F)(F)C(F)(Cl)Cl	307-41-5	1,1,3,5,7,9,10-Heptachloro-1,2,2,3,4,4,5,6,6,7,8,8,9,10,10-pentadecafluorodecane	653.251	25.7629	-136.217	Organic compounds	Organohalogen compounds	Alkyl halides	Alkyl chlorides			1.17894	-0.831894	2.98896	0.81832			-0.0737835	-1.87758	2.2939	0.764749
ADXNPXDFKKWVGE-UHFFFAOYSA-N	CCCCCCCCCCCCCN(C)C		CCCCCCCCCCCCCN(C)C	17373-29-4	N,N-Dimethyltridecylamine	227.436	95.0271	-95.4705	Organic compounds	Organic nitrogen compounds	Organonitrogen compounds	Amines			1.23082	0.40586	2.2086	0			0.899864	-0.355148	2.26479	0.186667
ADXUXRNLBYKGOA-QYYRPYCUSA-N	NC1=NC=NC2=C1N=CN2C1OC(CO)C(O)C1Cl		NC1=NC=NC2=C1N=CN2C1OC(CO)C(O)C1Cl	2627-62-5	["2'-Chloro-2'-deoxyadenosine"]	285.691	30.3559	130.178	Organic compounds	Nucleosides, nucleotides, and analogues	Purine nucleosides	Purine 2'-deoxyribonucleosides			1.7959	-0.545916	2.77014	0.750231			1.06234	-0.5473	2.92545	0.774377
ADXZNWSXVJABKX-BYPYZUCNSA-N	OC(=O)C1CCC(=O)N1CO		OC(=O)C1CCC(=O)N1CO	55525-34-3	1-(Hydroxymethyl)-5-oxo-L-proline	159.141	53.2566	41.3164	Organic compounds	Organic acids and derivatives	Carboxylic acids and derivatives	Amino acids, peptides, and analogues			1.87878	0.58574	2.52081	0.734623			1.31007	-0.124602	3.1032	0.71843
ADYNCUBVNWLXQE-UHFFFAOYSA-N	C=COC(=O)C(F)(F)C(F)(F)C(F)(F)C(F)(F)C(F)(F)C(F)(F)F		C=COC(=O)C(F)(F)C(F)(F)C(F)(F)C(F)(F)C(F)(F)C(F)(F)F	240408-96-2	Ethenyl perfluoroheptanoate	390.095	4.93982	-138.45	Organic compounds	Organohalogen compounds	Alkyl halides	Alkyl fluorides			1.37788	-0.994397	2.41355	0.574599			0.803409	-1.44487	1.78683	0.603385
ADYPJKNMIDVKIU-UHFFFAOYSA-N	[O-][N+](=O)C1=CC=C(O1)C(=O)NC1C=NC=CC=1		[O-][N+](=O)C1=CC=C(O1)C(=O)NC1C=NC=CC=1	43151-33-3	2-Furancarboxamide, 5-nitro-N-3-pyridinyl-	233.183	-32.6124	-16.9159	Organic compounds	Organoheterocyclic compounds	Furans	Nitrofurans			1.5198	0.127371	2.41014	0.735211			0.910975	-0.600033	2.5516	0.718024
ADYPXRFPBQGGAH-UMYZUSPBSA-N	CC1(NC(=O)C2CN(C)C3CC4=CNC5=CC=CC(C3C2)=C45)OC2(O)C3CCCN3C(=O)C(CC3C=CC=CC=3)N2C1=O.CS(O)(=O)=O	CS(=O)(=O)O	CC1(NC(=O)C2CN(C)C3CC4=CNC5=CC=CC(C3C2)=C45)OC2(O)C3CCCN3C(=O)C(CC3C=CC=CC=3)N2C1=O	6190-39-2	Dihydroergotamine mesylate	583.689	0.755918	172.434	Organic compounds	Alkaloids and derivatives	Ergoline and derivatives	Lysergic acids and derivatives			1.7417	-0.513529	2.78431	0.767183			0.971	-1.43579	2.67289	0.793664
ADZAAKGRMMGJKM-UHFFFAOYSA-N	[O-][N+](=O)OCC1CO1		[O-][N+](=O)OCC1CO1	6659-62-7	(Oxiran-2-yl)methyl nitrate	119.076	139.833	35.5517	Organic compounds	Organic oxygen compounds	Organic oxoanionic compounds	Organic nitrates			1.67183	-0.0653311	2.48925	0.625667			0.896512	-0.629613	2.45277	0.619595
ADZHXBNWNZIHIX-XYGAWYNKSA-N	[Cl-].CC1OC(OCC2OC(OC3=CC4C(=CC(O)=CC=4O)[O+]=C3C3C=C(O)C(O)=CC=3)C(O)C(O)C2O)C(O)C(O)C1O	[Cl-]	CC1OC(OCC2OC(Oc3cc4c(cc(O)cc4O)oc3C3C=C(O)C(O)=CC=3)C(O)C(O)C2O)C(O)C(O)C1O	18719-76-1	Antirrhinin	595.53	34.5713	161.825	Organic compounds	Phenylpropanoids and polyketides	Flavonoids	Flavonoid glycosides			2.1756	-0.513497	3.0869	0.758963			1.86627	-1.06388	3.31185	0.728565
ADZLWSMFHHHOBV-BYPYZUCNSA-N	OC(=O)CCC(NC=O)C(O)=O		OC(=O)CCC(NC=O)C(O)=O	1681-96-5	N-Formylglutamate	175.14	41.0855	-51.5436	Organic compounds	Organic acids and derivatives	Carboxylic acids and derivatives	Amino acids, peptides, and analogues			1.97741	0.834149	2.60289	0.605557			2.18424	0.502456	3.21854	0.659338
ADZSGNDOZREKJK-UHFFFAOYSA-N	CCSc1[n][n]c(c(=O)[n]1N)C(C)(C)C		CCSc1[n][n]c(c(=O)[n]1N)C(C)(C)C	64529-56-2	Ethiozin	228.321	-6.20342	26.8175	Organic compounds	Organosulfur compounds	Thioethers	Aryl thioethers			0.78775	-0.393207	2.06313	0.679822			0.470358	-0.832016	1.87203	0.674681
ADZUEEUKBYCSEY-UHFFFAOYSA-N	O=CC1C=C2C=CNC2=CC=1		O=CC1C=C2C=CNC2=CC=1	1196-69-6	Indole-5-carboxaldehyde	145.161	-97.1795	64.6136	Organic compounds	Organoheterocyclic compounds	Indoles and derivatives	Indoles			1.46882	0.286928	2.2001	0.6728			1.19882	-0.337969	2.39942	0.675745
ADZXDFALMZGPTN-UHFFFAOYSA-M	[Br-].CC[N+](CCOC(=O)C(C1CCCC1)C1CCCC1)(CC)CC	[Br-]	CC[N+](CCOC(=O)C(C1CCCC1)C1CCCC1)(CC)CC	2001-81-2	Diponium bromide	324.529	102.655	21.0845	Organic compounds	Organic nitrogen compounds	Organonitrogen compounds	Quaternary ammonium salts			1.86876	0.582933	2.58995	0.707737			0.937771	-0.400791	2.41856	0.72338
ADZYJDJNIBFOQE-RGKMBJPFSA-N	COC(=O)C1C=C2CC(=O)CCC2(C)C2CCC3(C)C(CCC43CCC(=O)O4)C21		COC(=O)C1C=C2CC(=O)CCC2(C)C2CCC3(C)C(CCC43CCC(=O)O4)C21	41020-65-9	Mexrenone	400.515	118.265	114.512	Organic compounds	Lipids and lipid-like molecules	Steroids and steroid derivatives	Steroid lactones			1.99553	-2.96826	2.68056	0.717958			0.660916	-2.65367	2.3977	0.734609
AEADGZSTCJUXRK-LLVKDONJSA-N	CCCCCCCCC1CCOC1=O		CCCCCCCCC1CCOC1=O	69830-91-7	2(3H)-Furanone, dihydro-5-octyl-, (5R)-	198.306	120.561	31.2677	Organic compounds	Organoheterocyclic compounds	Lactones	Gamma butyrolactones			2.16121	1.18305	2.69277	0.53881			1.62282	0.422304	2.67954	0.552834
AEALMZFAWWJXJP-UHFFFAOYSA-N	[NH4+].OCCN(CCO)C([S-])=S	[NH4+]	OCCN(CCO)C(S)=S	75074-70-3	Carbamic acid, bis(2-hydroxyethyl)dithio-, ammonium salt	181.282	66.8742	-89.3473	Organic compounds	Organic nitrogen compounds	Organonitrogen compounds	Amines			0.618774	-0.720009	1.9332	0.57673			0.64218	-0.584319	2.13479	0.590063
AEAPORIZZWBIEX-DTBDINHYSA-N	CC12CCC3C(CCC4CC(O)CCC43C)C1(O)CCC2(O)C1C=COC=1		CC12CCC3C(CCC4CC(O)CCC43C)C1(O)CCC2(O)C1C=COC=1	156722-18-8	Rostafuroxin	374.521	88.5162	123.071	Organic compounds	Lipids and lipid-like molecules	Steroids and steroid derivatives	17-furanylsteroids and derivatives			1.19627	-3.34187	2.49638	0.797967			0.631193	-3.31954	2.45845	0.774628
AEARHBYNCLPVFQ-UHFFFAOYSA-N	CC(CC(O)NC1=CC=CC=C1C(=O)OC)C1C=CC=CC=1		CC(CC(O)NC1=CC=CC=C1C(=O)OC)C1C=CC=CC=1	144761-91-1	Benzoic acid, 2-[(1-hydroxy-3-phenylbutyl)amino], methyl ester	299.37	-46.6535	1.3112	Organic compounds	Benzenoids	Benzene and substituted derivatives	Benzoic acids and derivatives			1.81016	0.547106	2.65722	0.591686			1.16102	-0.185031	2.51154	0.584141
AEARPZNULDFPNQ-UHFFFAOYSA-N	CCNC(=O)OC		CCNC(=O)OC	6135-31-5	Carbamic acid, ethyl-, methyl ester	103.121	58.4901	-52.4074	Organic compounds	Organic acids and derivatives	Carboxylic acids and derivatives	Amino acids, peptides, and analogues			1.88903	0.467058	2.55552	0.637955			1.21824	0.0597162	2.66848	0.644372
AEASHRDYTBPWPD-UHFFFAOYSA-N	CC(=O)C(=NNC1=CC=C(Cl)C=C1C(F)(F)F)C(=O)Nc1cc2[nH]c(=O)[nH]c2cc1		CC(=O)C(N=NC1C=CC(Cl)=CC=1C(F)(F)F)C(=O)Nc1cc2[nH]c(=O)[nH]c2cc1	39951-83-2	Butanamide, 2-[2-[4-chloro-2-(trifluoromethyl)phenyl]diazenyl]-N-(2,3-dihydro-2-oxo-1H-benzimidazol-5-yl)-3-oxo-	439.781	-158.767	22.4481	Organic compounds	Organic acids and derivatives	Carboxylic acids and derivatives	Amino acids, peptides, and analogues			2.10191	0.41839	2.76655	0.342298			0.923598	-2.28558	3.24772	0.435318
AEBAYKKLSQLBDU-UHFFFAOYSA-M	[O-]C(=O)C(F)(F)C(F)(F)C(F)(F)C(F)(F)C(F)(F)C(F)(F)C(F)F		OC(=O)C(F)(F)C(F)(F)C(F)(F)C(F)(F)C(F)(F)C(F)(F)C(F)F	1696259-68-3	8-H-Perfluorooctanoate	396.074	10.87	-141.325	Organic compounds	Lipids and lipid-like molecules	Fatty Acyls	Fatty acids and conjugates			1.34446	-1.03689	2.37312	0.480435			0.798322	-0.901209	1.62915	0.536232
AEBAYKKLSQLBDU-UHFFFAOYSA-N	OC(=O)C(F)(F)C(F)(F)C(F)(F)C(F)(F)C(F)(F)C(F)(F)C(F)F		OC(=O)C(F)(F)C(F)(F)C(F)(F)C(F)(F)C(F)(F)C(F)(F)C(F)F	13973-14-3	8H-Perfluorooctanoic acid	396.074	11.5454	-141.127	Organic compounds	Lipids and lipid-like molecules	Fatty Acyls	Fatty acids and conjugates			1.34446	-1.03689	2.37312	0.480435			0.798322	-0.901209	1.62915	0.536232
AEBBCDMWPOXGSG-UHFFFAOYSA-N	COC1=CC=C2C(=CC=CC2=C1C(F)(F)F)C(O)=O		COC1=CC=C2C(=CC=CC2=C1C(F)(F)F)C(O)=O	84532-72-9	1-Naphthalenecarboxylic acid, 6-methoxy-5-(trifluoromethyl)-	270.206	-23.7926	93.946	Organic compounds	Benzenoids	Naphthalenes	Naphthalenecarboxylic acids and derivatives			1.18799	-0.503155	2.29772	0.646666			0.780567	-1.37752	2.24204	0.668328
AEBBXVHGVADBHA-UHFFFAOYSA-M	[Cl-].CN1CCN(C)C1=[Cl+]	[Cl-]	CN1CCN(C)C1=[Cl+]	37091-73-9	(1,3-Dimethylimidazolidin-2-ylidene)chloraniumato chlorido	133.602	52.0928	34.6074	Organic compounds	Organoheterocyclic compounds	Azolines	Imidazolines			1.30503	-0.63845	2.34368	0.688337			1.13103	-0.706952	2.50482	0.780262
AEBDYALCYLNGHV-UHFFFAOYSA-N	O=C1NC(=O)C(N1)(C1=CC=CS1)C1=CC=CS1		O=C1NC(=O)C(N1)(C1=CC=CS1)C1=CC=CS1	62032-07-9	5,5-dithien-2-ylimidazolidine-2,4-dione	264.331	47.0423	68.9947	Organic compounds	Organoheterocyclic compounds	Azolidines	Imidazolidines			0.966236	-0.588558	2.3135	0.682477			0.895343	-0.844433	2.40049	0.670134
AEBJDOTVYMITIA-UHFFFAOYSA-N	[O-][N+](=O)C1C(Cl)=CC(Cl)=CC=1Cl		[O-][N+](=O)C1C(Cl)=CC(Cl)=CC=1Cl	18708-70-8	2,4,6-Trichloronitrobenzene	226.446	-137.134	20.8029	Organic compounds	Benzenoids	Benzene and substituted derivatives	Nitrobenzenes			1.13324	-0.59744	2.15243	0.551743			0.658585	-0.541428	2.06385	0.584023
AEBJPMMMKMMACK-UHFFFAOYSA-N	O=S(=O)(F)C1CC(CC1)S(=O)(=O)F		O=S(=O)(F)C1CC(CC1)S(=O)(=O)F	35944-73-1	1,3-Cyclopentanedisulfonyl difluoride	234.245	100.02	33.6636	Organic compounds	Organohalogen compounds	Sulfonyl halides	Sulfonyl fluorides			1.65872	-0.138148	2.59048	0.817076			1.34843	-0.663632	2.56046	0.841774
AEBRINKRALSWNY-BYPYZUCNSA-N	CC(CCN)C(O)=O		CC(CCN)C(O)=O	732304-03-9	CHEMBL256608	117.148	55.0855	-62.1586	Organic compounds	Organic acids and derivatives	Carboxylic acids and derivatives	Amino acids, peptides, and analogues			1.90614	0.581371	2.60776	0.586116			2.15626	0.721566	3.04302	0.60079
AECDBHGVIIRMOI-UHFFFAOYSA-N	NC1N=CN=C2C=1C(=CN2C1CC(CN2CCC2)C1)C1C=C(C=CC=1)OCC1C=CC=CC=1		NC1N=CN=C2C=1C(=CN2C1CC(CN2CCC2)C1)C1C=C(C=CC=1)OCC1C=CC=CC=1	475489-16-8	NVP-AEW541	439.563	17.9687	127.032	Organic compounds	Organoheterocyclic compounds	Pyrroles	Substituted pyrroles			1.3584	-0.243206	2.48151	0.761228			0.936453	-0.508302	2.42993	0.759048
AECGEIVNZGQBJT-UHFFFAOYSA-N	OC(=O)CCSC(C1C=CC=CC=1)(C1C=CC=CC=1)C1C=CC=CC=1		OC(=O)CCSC(C1C=CC=CC=1)(C1C=CC=CC=1)C1C=CC=CC=1	27144-18-9	3-[(Triphenylmethyl)sulfanyl]propanoic acid	348.467	-29.7547	-66.9747	Organic compounds	Benzenoids	Triphenyl compounds				1.17409	-2.66302	2.52724	0.639691			0.958795	-3.23127	2.31626	0.656273
AECHTYJNUUZQBK-UHFFFAOYSA-N	CCC1(C)CC(CCO1)C1=CSC(N)=N1		CCC1(C)CC(CCO1)C1=CSC(N)=N1	88572-17-2	STK831378	226.345	12.3184	25.0872	Organic compounds	Organoheterocyclic compounds	Azoles	Thiazoles			1.04499	-0.553542	3.48435	0.810267			0.706909	-0.537092	2.00921	0.828238
AECKNGLDPIWXEE-UHFFFAOYSA-N	CC(C)COc1[n]c2c(c(=O)[n](C)c(=O)[n]2C)[n]1C		CC(C)COc1[n]c2c(c(=O)[n](C)c(=O)[n]2C)[n]1C	5438-76-6	MLS000737466	266.301	18.4906	101.962	Organic compounds	Organoheterocyclic compounds	Imidazopyrimidines	Purines and purine derivatives			1.65314	0.175532	2.5838	0.704477			1.12984	-0.326044	2.46812	0.704477
AEDDIBAIWPIIBD-ZJKJAXBQSA-N	OCC1OC(C(O)C(O)C1O)c1c(O)c2c(=O)c3cc(O)c(O)cc3oc2cc1O		OCC1OC(C(O)C(O)C1O)c1c(O)c2c(=O)c3cc(O)c(O)cc3oc2cc1O	4773-96-0	Chinonin	422.342	32.7384	162.875	Organic compounds	Organoheterocyclic compounds	Benzopyrans	1-benzopyrans			2.13434	0.482358	2.93321	0.713634			2.00879	-0.726012	3.13824	0.730876
AEDIXYWIVPYNBI-UHFFFAOYSA-N	CCCCCCC(N)=O		CCCCCCC(N)=O	628-62-6	Heptanamide	129.203	89.1439	-49.743	Organic compounds	Lipids and lipid-like molecules	Fatty Acyls	Fatty amides			1.87506	0.366469	2.5246	0.380952			1.675	0.154079	2.84439	0.286908
AEDJBDRIBQPIFS-UHFFFAOYSA-N	CC(C)(C1=CC(CCC(C)CC(C)(C)C)=CC=C1O)C1=CC(CCC(C)CC(C)(C)C)=CC=C1O		CC(C)(C1=CC(CCC(C)CC(C)(C)C)=CC=C1O)C1=CC(CCC(C)CC(C)(C)C)=CC=C1O	85371-53-5	["2,2'-(Propane-2,2-diyl)bis[4-(3,5,5-trimethylhexyl)phenol]"]	480.777	-6.93175	-39.522	Organic compounds	Benzenoids	Benzene and substituted derivatives	Diphenylmethanes			1.82711	0.0809094	2.57567	0.664021			1.07983	-0.0558108	2.37646	0.683272
AEDOTOMIDAMDFC-UHFFFAOYSA-N	O=C(C1=COC=C1)N(C1CCN(CCC2C=CC=CC=2)CC1)C1C=CC=CC=1		O=C(C1=COC=C1)N(C1CCN(CCC2C=CC=CC=2)CC1)C1C=CC=CC=1	101343-82-2	3-Furanylfentanyl	374.484	18.4946	72.2595	Organic compounds	Benzenoids	Benzene and substituted derivatives	Anilides			1.43997	0.20648	2.43333	0.723488			0.894353	-0.166874	2.27072	0.72727
AEDQNOLIADXSBB-UHFFFAOYSA-N	CCCCCCCCCCCCNCCC(O)=O		CCCCCCCCCCCCNCCC(O)=O	1462-54-0	.beta.-Alanine, N-dodecyl-	257.418	71.5606	-42.6911	Organic compounds	Organic acids and derivatives	Carboxylic acids and derivatives	Amino acids, peptides, and analogues			2.2151	1.12083	2.77102	0.4			2.06295	0.419954	3.07874	0.4
AEEARKNYRMBNSW-UHFFFAOYSA-N	CC1C=CC(=CC=1)S(=O)(=O)NC1=CC=CC=C1[N+]([O-])=O		CC1C=CC(=CC=1)S(=O)(=O)NC1=CC=CC=C1[N+]([O-])=O	6380-13-8	["2'-nitro-p-toluenesulfonanilide"]	292.316	-111.436	-50.0319	Organic compounds	Benzenoids	Benzene and substituted derivatives	Toluenes			1.86926	0.217439	2.55378	0.559554			1.01226	-0.416397	2.44202	0.570411
AEEGJNJYJCGJFZ-LURJTMIESA-N	CC(C)COC(=O)C(C)Cl		CC(C)COC(=O)C(C)Cl	83261-15-8	Isobutyl (S)-2-chloropropionate	164.632	113.409	-21.6826	Organic compounds	Organic acids and derivatives	Carboxylic acids and derivatives	Alpha-halocarboxylic acids and derivatives			1.15587	-0.00259508	2.366	0.560948	1.12648	1.12648	1.01907	-0.343276	1.93145	0.433137
AEEGJNJYJCGJFZ-UHFFFAOYSA-N	CC(C)COC(=O)C(C)Cl		CC(C)COC(=O)C(C)Cl	62108-67-2	2-Methylpropyl 2-chloropropanoate	164.632	113.409	-21.6826	Organic compounds	Organic acids and derivatives	Carboxylic acids and derivatives	Alpha-halocarboxylic acids and derivatives			1.15587	-0.00259508	2.366	0.560948	1.12648	1.12648	1.01907	-0.343276	1.93145	0.433137
AEEKFROUFQUJLB-UHFFFAOYSA-J	[Pa+4].[O-]C(=O)C([O-])=O.[O-]C(=O)C([O-])=O	[Pa+4]	OC(=O)C(O)=O	2040-52-0	Protactinium(4+) diethanedioate	90.034	80.4607	-76.3751	Organic compounds	Organic acids and derivatives	Carboxylic acids and derivatives	Dicarboxylic acids and derivatives			1.34419	0.122746	2.31014	0.568038			1.56814	0.112662	2.55067	0.440765
AEELKYIIVNTYLF-UHFFFAOYSA-N	OCC(=O)CC1=CNC2=CC=C(Br)C=C21		OCC(=O)CC1=CNC2=CC=C(Br)C=C21	919295-64-0	1-(5-Bromo-1H-indol-3-yl)-3-hydroxypropan-2-one	268.11	-49.7152	121.671	Organic compounds	Organoheterocyclic compounds	Indoles and derivatives	Indoles			1.13533	-0.466594	2.26765	0.786287			0.901908	-0.352634	2.16068	0.715581
AEENCSHKTVTKMV-UHFFFAOYSA-N	CC1=CC=CC(NCC2=CC=CC=C2O)=N1		CC1=CC=CC(NCC2=CC=CC=C2O)=N1	104768-37-8	2-{[(6-methylpyridin-2-yl)amino]methyl}phenol	214.268	-69.5641	10.0704	Organic compounds	Benzenoids	Benzene and substituted derivatives	Benzylamines			1.48186	-0.162784	2.30748	0.688021			0.999142	-0.325968	2.12221	0.691867
AEEUYSFCGITNNH-UHFFFAOYSA-N	CCCCCCC1C=NC(=NC=1)C1C=CC(=CC=1)OCCCCCCC		CCCCCCC1C=NC(=NC=1)C1C=CC(=CC=1)OCCCCCCC	57202-29-6	Pyrimidine, 2-[4-(heptyloxy)phenyl]-5-hexyl-	354.538	-19.4438	-86.525	Organic compounds	Benzenoids	Phenol ethers				1.44593	-0.0584942	2.40214	0.580144			1.04208	-0.21869	2.39488	0.640251
AEFLONBTGZFSGQ-GSVOUGTGSA-N	NC(=O)C(N)CCC(O)=O		NC(=O)C(N)CCC(O)=O	19522-40-8	(R)-4,5-Diamino-5-oxopentanoic acid	146.146	40.8358	-61.6815	Organic compounds	Organic acids and derivatives	Carboxylic acids and derivatives	Amino acids, peptides, and analogues			1.95753	0.692891	2.58456	0.55296			2.35253	0.90552	3.14956	0.534909
AEFLONBTGZFSGQ-UHFFFAOYSA-N	NC(=O)C(N)CCC(O)=O		NC(=O)C(N)CCC(O)=O	NOCAS_901304	Isoglutamine	146.146	40.8358	-61.6815	Organic compounds	Organic acids and derivatives	Carboxylic acids and derivatives	Amino acids, peptides, and analogues			1.95753	0.692891	2.58456	0.55296			2.35253	0.90552	3.14956	0.534909
AEFPPQGZJFTXDR-UHFFFAOYSA-M	[I-].C1=CC=CC=C1[P+](C1C=CC=CC=1)(C1C=CC=CC=1)C1C=CC=CC=1	[I-]	C1=CC=CC=C1P(C1C=CC=CC=1)(C1C=CC=CC=1)C1C=CC=CC=1	2065-67-0	Tetraphenylphosphanium iodide	340.406	-55.3493	-86.497	Organic compounds	Benzenoids	Benzene and substituted derivatives	Phenylphosphines and derivatives			1.29988	-2.41783	2.46306	0.59812			0.970351	-3.27214	2.48785	0.614286
AEGDXMYEDPEYCG-UHFFFAOYSA-N	O=C(NC1=CC=CC=N1)C(=O)NC1=CC=CC=N1		O=C(NC1=CC=CC=N1)C(=O)NC1=CC=CC=N1	20172-97-8	["N,N'-BIS(2-PYRIDYL)OXALAMIDE"]	242.238	-39.0067	-15.0193	Organic compounds	Organic acids and derivatives	Carboxylic acids and derivatives	Amino acids, peptides, and analogues			1.73178	-0.333059	2.55611	0.674971			1.1274	-0.330151	2.58545	0.650736
AEGSYIKLTCZUEZ-FZTWWWDYSA-K	[111In+3].[O-]C1=CC=CC2=CC=CN=C12.[O-]C1=CC=CC2=CC=CN=C12.[O-]C1=CC=CC2=CC=CN=C12	[111In+3]	OC1C=CC=C2C=CC=NC2=1	65389-08-4	Indium In 111 Oxyquinoline	145.161	-97.2898	29.4719	Organic compounds	Organoheterocyclic compounds	Quinolines and derivatives				1.52313	0.225507	2.21307	0.686125			1.3469	0.149538	2.13663	0.520552
AEGSYIKLTCZUEZ-UHFFFAOYSA-K	[In+3].[O-]C1=CC=CC2=CC=CN=C12.[O-]C1=CC=CC2=CC=CN=C12.[O-]C1=CC=CC2=CC=CN=C12	[In+3]	OC1C=CC=C2C=CC=NC2=1	14514-42-2	Indium oxine	145.161	-97.2979	29.4965	Organic compounds	Organoheterocyclic compounds	Quinolines and derivatives				1.52313	0.225507	2.21307	0.686125			1.3469	0.149538	2.13663	0.520552
AEGTXRAMXBTODF-UHFFFAOYSA-N	CCCCCCCC1(C)OCC(C)O1		CCCCCCCC1(C)OCC(C)O1	165191-91-3	2-Heptyl-2,4-dimethyl-1,3-dioxolane	200.322	124.866	39.2375	Organic compounds	Organic oxygen compounds	Organooxygen compounds	Ethers			1.94586	0.812838	2.57415	0.669717			1.32113	-0.0504654	2.24733	0.703704
AEHCJVYHSFLCHM-UHFFFAOYSA-N	O=C(NC1=NC2=C(Cl)C=CC=C2S1)C1CC1		O=C(NC1=NC2=C(Cl)C=CC=C2S1)C1CC1	77414-54-1	AG-H-09706	252.726	-86.746	20.893	Organic compounds	Organoheterocyclic compounds	Benzothiazoles				1.16735	-0.100294	2.26642	0.735261			0.853338	-0.347299	2.05732	0.729183
AEHCUJFRMRNWTB-UHFFFAOYSA-N	CC1=CC(=CC=C1F)S(=O)(=O)NCC(O)=O		CC1=CC(=CC=C1F)S(=O)(=O)NCC(O)=O	670260-29-4	N-[(4-fluoro-3-methylphenyl)sulfonyl]glycine	247.247	-120.003	-52.7815	Organic compounds	Benzenoids	Benzene and substituted derivatives	Benzenesulfonamides			1.79217	0.157967	2.51092	0.652652			1.4484	-0.390668	2.65317	0.702654
AEHDSYHVTDJGDN-UHFFFAOYSA-M	[Br-].O=C(C[P+](C1C=CC=CC=1)(C1C=CC=CC=1)C1C=CC=CC=1)C1C=CC=CC=1	[Br-]	O=C(CP(C1C=CC=CC=1)(C1C=CC=CC=1)C1C=CC=CC=1)C1C=CC=CC=1	6048-29-9	(2-Oxo-2-phenylethyl)(triphenyl)phosphanium bromide	382.443	-10.7781	-98.9232	Organic compounds	Benzenoids	Benzene and substituted derivatives	Phenylphosphines and derivatives			1.62017	-2.49402	2.62208	0.589064			1.0523	-3.15753	2.56254	0.602262
AEHGPUHATMBSCG-UHFFFAOYNA-M	[Na+].[O-]S(=O)(=O)C(F)(F)C(F)(F)C(F)(F)OC(F)(C(F)(F)OC(F)(Cl)C(F)(F)Cl)C(F)(F)F	[Na+]	OS(=O)(=O)C(F)(F)C(F)(F)C(F)(F)OC(F)(C(F)(F)OC(F)(Cl)C(F)(F)Cl)C(F)(F)F	1383434-30-7	Sodium perfluoro(3-{[1-(1,2-dichloro-1,2,2-trifluoroethoxy)propan-2-yl]oxy}propyl)sulfonate	565.034	-7.0546	-145.493	Organic compounds	Organic acids and derivatives	Organic sulfonic acids and derivatives	Organosulfonic acids and derivatives			1.37013	-0.913488	2.69125	0.671908			-0.151361	-1.45929	2.23058	0.648637
AEHGQXKBQBMQEK-UHFFFAOYSA-K	[Na+].[Na+].[Na+].[O-]S(=O)(=O)C1C=C(O)C2C(=CC(=C(N=NC3C=CC(=CC=3)S([O-])(=O)=O)C=2O)S([O-])(=O)=O)C=1	[Na+]	OC1=CC(=CC2=CC(=C(N=NC3C=CC(=CC=3)S(O)(=O)=O)C(O)=C12)S(O)(=O)=O)S(O)(=O)=O	23647-14-5	2,7-Naphthalenedisulfonic acid, 4,5-dihydroxy-3-[(4-sulfophenyl)azo]-, trisodium salt	504.476	-171.195	-18.6675	Organic compounds	Benzenoids	Naphthalenes	Naphthalene sulfonic acids and derivatives			1.91289	0.978953	2.62432	0.3701			1.76404	-0.603034	2.91803	0.479333
AEHJDQSLTMFLQO-UHFFFAOYSA-N	CCCCCCS(=O)(=O)Cl		CCCCCCS(=O)(=O)Cl	14532-24-2	1-Hexanesulfonyl chloride	184.688	38.1981	-91.445	Organic compounds	Organohalogen compounds	Sulfonyl halides	Sulfonyl chlorides			1.30058	-0.485609	2.5004	0.555556			0.965726	-1.50634	2.33436	0.555556
AEHJMNVBLRLZKK-UHFFFAOYSA-N	FC(F)(F)C1C=NC(=CC=1)OCCCOC1C(Cl)=CC(=CC=1Cl)OCC=C(Cl)Cl		FC(F)(F)C1C=NC(=CC=1)OCCCOC1C(Cl)=CC(=CC=1Cl)OCC=C(Cl)Cl	179101-81-6	Pyridalyl	491.12	-63.6734	-115.713	Organic compounds	Benzenoids	Benzene and substituted derivatives	Halobenzenes	0.977096	0.977096	0.977121	-0.265103	2.23078	0.566137	0.571562	0.571562	0.561508	-4.13347	2.22361	0.537231
AEHJOHLAUWUPQW-UHFFFAOYSA-N	CN1CCN(CC1)S(=O)(=O)C1C=C(c2[nH]c3c([n][n](C)c3CCC)c(=O)[n]2)C(=CC=1)OCC		CN1CCN(CC1)S(=O)(=O)C1C=C(c2[nH]c3c([n][n](C)c3CCC)c(=O)[n]2)C(=CC=1)OCC	253178-46-0	Iso Sildenafil	474.587	-104.332	110.374	Organic compounds	Benzenoids	Benzene and substituted derivatives	Benzenesulfonamides			1.83231	0.21146	2.60209	0.791701			1.31885	-0.109495	2.38869	0.726584
AEHJRYDHBZWJJS-UHFFFAOYSA-M	[Li+].CC1=CC=C2C=CC=CC2=C1S([O-])(=O)=O	[Li+]	CC1C=CC2C=CC=CC=2C=1S(O)(=O)=O	94248-44-9	Lithium 2-methylnaphthalenesulphonate	222.265	-141.105	-16.6364	Organic compounds	Benzenoids	Naphthalenes	Naphthalene sulfonic acids and derivatives			1.79475	0.60781	2.42825	0.603272			1.35127	-0.14431	2.42962	0.638706
AEHKSCQHBUCHTF-UHFFFAOYSA-N	CC(=O)CC(=O)NC1C=C(OC)C(=CC=1Cl)NC(C)=O		CC(=O)CC(=O)NC1C=C(OC)C(=CC=1Cl)NC(C)=O	84176-82-9	N-(4-(Acetylamino)-2-chloro-5-methoxyphenyl)-3-oxobutyramide	298.726	-101.688	10.0631	Organic compounds	Benzenoids	Benzene and substituted derivatives	Anilides			1.40349	-0.313806	2.46661	0.643103			0.836439	-0.580658	2.24796	0.659878
AEHLRHNHBHGHBT-UHFFFAOYSA-N	CCN(CC1C=CC(CN(CC)C(=O)C(Cl)Cl)=CC=1)C(=O)C(Cl)Cl		CCN(CC1C=CC(CN(CC)C(=O)C(Cl)Cl)=CC=1)C(=O)C(Cl)Cl	1477-20-9	Win 13099	414.16	-43.9557	-81.5057	Organic compounds	Benzenoids	Benzene and substituted derivatives				1.49479	-0.387431	2.67841	0.66584			0.833428	-1.65426	2.34996	0.686969
AEHPOYAOLCAMIU-UHFFFAOYSA-N	[O-][N+](=O)C1=CN=C(CO)N1CCO		[O-][N+](=O)C1=CN=C(CO)N1CCO	4812-40-2	1-(2-Hydroxyethyl)-2-hydroxymethyl-5-nitroimidazole	187.155	-111.333	5.38838	Organic compounds	Organoheterocyclic compounds	Azoles	Imidazoles			1.82971	0.164883	2.5909	0.733452			1.02791	-0.473649	2.54553	0.766865
AEHUAZHMBGNFSC-UHFFFAOYSA-M	[O-]C(=O)C(O)=O.OC[P+](CO)(CO)CO	[O-]C(C(=O)O)=O	OCP(CO)(CO)CO	53211-22-6	Phosphonium, tetrakis(hydroxymethyl)-, ethanedioate (1:1) (salt)	156.118	85.5827	-83.4944	Organic compounds	Organic acids and derivatives	Carboxylic acids and derivatives	Dicarboxylic acids and derivatives			0.909302	-0.0222568	2.393	0.585455			1.79443	0.330298	2.8702	0.589301
AEHWKBXBXYNPCX-UHFFFAOYSA-N	CCSC1C=CC=CC=1		CCSC1C=CC=CC=1	622-38-8	(Ethylthio)benzene	138.235	-54.4277	-77.7423	Organic compounds	Organosulfur compounds	Thioethers	Aryl thioethers			1.34188	0.0586068	2.31938	0.641708			0.592356	-1.15562	2.02991	0.631889
AEICYOGNGQXPJB-UHFFFAOYSA-N	OC1=CC=CC=C1C(=O)NC1C=C(Cl)C=CC=1		OC1=CC=CC=C1C(=O)NC1C=C(Cl)C=CC=1	24448-71-3	N-(3-chlorophenyl)-2-hydroxybenzamide	247.681	-81.7933	-51.4267	Organic compounds	Benzenoids	Benzene and substituted derivatives	Anilides			1.36322	-0.0281481	2.39685	0.58475			1.00052	-0.243245	2.17277	0.577637
AEIFATUAVHHRBC-GYPCSUJESA-N	CC12CC(OC3C(OC)C(C)OC(OC4C(COC)OC(OC5OCC6OC7(OC6C5OC(=O)C(C)C)OC(C)C(O)(C5OCOC75)C(C)O)C(OC)C4O)C3O)OC(C)C1OC1(CC(O)C(OC3CC(O)C(OC(=O)C4C(OC)=C(Cl)C(O)=C(Cl)C=4C)C(C)O3)C(C)O1)O2		CC12CC(OC3C(OC)C(C)OC(OC4C(COC)OC(OC5OCC6OC7(OC6C5OC(=O)C(C)C)OC(C)C(O)(C5OCOC75)C(C)O)C(OC)C4O)C3O)OC(C)C1OC1(CC(O)C(OC3CC(O)C(OC(=O)C4C(OC)=C(Cl)C(O)=C(Cl)C=4C)C(C)O3)C(C)O1)O2	69787-80-0	Avilamycin C	1406.27	70.9375	125.96	Organic compounds	Organic oxygen compounds	Organooxygen compounds	Carbohydrates and carbohydrate conjugates			2.31293	-0.171866	3.14703	0.799095			1.60113	-4.41424	3.62275	0.796308
AEIJTFQOBWATKX-UHFFFAOYSA-N	CCCCCCC(O)CO		CCCCCCC(O)CO	1117-86-8	1,2-Octanediol	146.23	131.123	-101.726	Organic compounds	Lipids and lipid-like molecules	Fatty Acyls	Fatty alcohols	1.96874	1.96874	2.11345	1.32546	2.71346	0.257391	1.36085	1.36085	1.86844	0.876525	2.67167	0.299957
AEIJVYPRKAWFPN-UHFFFAOYSA-N	CCCCCC(=O)OCCN(CC)CC		CCCCCC(=O)OCCN(CC)CC	10369-83-2	2-(Diethylamino)ethyl hexanoate	215.337	138.352	1.28784	Organic compounds	Lipids and lipid-like molecules	Fatty Acyls	Fatty acid esters			1.93197	0.87072	2.61355	0.362299			1.25357	-0.134893	2.39657	0.394444
AEILLAXRDHDKDY-UHFFFAOYSA-N	BrCC1CC1		BrCC1CC1	7051-34-5	Bromomethylcyclopropane	135.004	112.192	40.2338	Organic compounds	Organohalogen compounds	Organobromides				1.16562	-0.628354	2.28862	0.701614			0.71728	-1.35013	2.47644	0.757235
AEINTQJDXLXKJS-NSHDSACASA-N	COC(=O)N1CCCCC1C1C=NC=CC=1		COC(=O)N1CCCCC1C1C=NC=CC=1	56078-09-2	Methyl 2-(pyridin-3-yl)piperidine-1-carboxylate	220.272	43.1801	79.1166	Organic compounds	Alkaloids and derivatives					1.48024	-0.535874	2.35559	0.687135			0.602076	-0.978817	2.15648	0.68259
AEIOZWYBDBVCGW-UHFFFAOYSA-N	CC(C)(C)C1=CC=CC=C1N		CC(C)(C)C1=CC=CC=C1N	6310-21-0	2-tert-Butylaniline	149.237	-87.2126	-22.9235	Organic compounds	Benzenoids	Benzene and substituted derivatives	Phenylpropanes			1.16062	0.167854	2.09356	0.588326			0.98342	-0.424919	1.9699	0.560507
AEIRDZABQGATLB-UHFFFAOYSA-N	C=COCC1CCC(COC(=O)C2=CC(=CC=C2)C(=O)OCC2CCC(COC=C)CC2)CC1		C=COCC1CCC(COC(=O)C2=CC(=CC=C2)C(=O)OCC2CCC(COC=C)CC2)CC1	119581-93-0	1,3-Bis[[4-[(ethenyloxy)methyl]cyclohexyl]methyl] 1,3-benzenedicarboxylate	470.606	17.9436	11.1515	Organic compounds	Benzenoids	Benzene and substituted derivatives	Benzoic acids and derivatives			1.92822	0.0732997	2.62968	0.643655			1.2772	-0.908566	2.458	0.678479
AEIUZSKXSWGSRU-QXGDPHCHSA-N	OC(=O)C=CC(O)=O.FC1C=CC(=CC=1)C1CCNCC1COC1C=C2OCOC2=CC=1	OC(C=CC(=O)O)=O	FC1C=CC(=CC=1)C1CCNCC1COC1C=C2OCOC2=CC=1	64006-44-6	Paroxetine maleate	329.371	2.87725	124.905	Organic compounds	Organoheterocyclic compounds	Piperidines	Phenylpiperidines			1.33975	-0.337477	2.38862	0.739534			0.834188	-0.789065	2.24522	0.752762
AEIVRFFWQSJCAR-UHFFFAOYSA-N	Oc1oc2ccccc2c(=O)c1CC1C=CC=CC=1		Oc1oc2ccccc2c(=O)c1CC1C=CC=CC=1	15074-18-7	3-Benzyl-4-hydroxy-2H-1-benzopyran-2-one	252.269	-87.1839	117.044	Organic compounds	Phenylpropanoids and polyketides	Coumarins and derivatives	Hydroxycoumarins			1.88336	0.792583	2.49755	0.674867			1.38905	0.196062	2.62468	0.693603
AEJDTAYHARDWRW-VLKMOBIUSA-N	[Fe+3].CCCCCC=CCC=CCCCCCCCC(O)=O.CCCCCC=CCC=CCCCCCCCC(O)=O.CCCCCC=CCC=CCCCCCCCC(O)=O	[Fe+3]	CCCCCC=CCC=CCCCCCCCC(O)=O	68109-59-1	9,12-Octadecadienoic acid (9Z,12Z)-, iron(3+) salt (3:1)	280.452	88.0524	-34.9024	Organic compounds	Lipids and lipid-like molecules	Fatty Acyls	Lineolic acids and derivatives			1.97447	-0.0541386	2.68299	0.3			1.85959	0.764279	2.70986	0.295475
AEJKOZRRMKOBQS-ITTXBHIMSA-N	CC1(C)C2CC3(CC(O)C2C)C1CCC3C		CC1(C)C2CC3(CC(O)C2C)C1CCC3C	13567-44-7	5-Neocedranol	222.372	104.895	82.7273	Organic compounds	Lipids and lipid-like molecules	Prenol lipids	Sesquiterpenoids			1.9421	0.494021	2.51754	0.722295			0.813917	-1.41474	2.26507	0.799717
AEJKOZRRMKOBQS-SHSNEVMNSA-N	CC1(C)C2CC3(CC(O)C2C)C1CCC3C		CC1(C)C2CC3(CC(O)C2C)C1CCC3C	13567-42-5	Cedran-9-ol	222.372	104.896	82.7269	Organic compounds	Lipids and lipid-like molecules	Prenol lipids	Sesquiterpenoids			1.9421	0.494021	2.51754	0.722295			0.813917	-1.41474	2.26507	0.799717
AEJOEPSMZCEYJN-HXUWFJFHSA-N	CN(C(CN1CCCC1)C1C=CC=CC=1)C(=O)CC1C=C(Cl)C(Cl)=CC=1		CN(C(CN1CCCC1)C1C=CC=CC=1)C(=O)CC1C=C(Cl)C(Cl)=CC=1	116508-24-8	3,4-Dichloro-N-methyl-N-((1S)-1-phenyl-2-(1-pyrrolidinyl)ethyl)benzeneacetamide	391.342	18.2029	78.8855	Organic compounds	Benzenoids	Benzene and substituted derivatives	Phenylacetamides			1.27707	-0.149429	2.30581	0.641015			0.752399	-0.25379	1.91826	0.64164
AEJPPSRYXGEVDT-UHFFFAOYSA-N	CCC(=O)C1=CC=CN1		CCC(=O)C1=CC=CN1	1073-26-3	2-Propionylpyrrole	123.155	-32.3377	2.81835	Organic compounds	Organic oxygen compounds	Organooxygen compounds	Carbonyl compounds			1.57545	-0.0508154	2.35081	0.709369			1.13332	-0.112326	2.26093	0.651962
AEJRTNBCFUOSEM-UHFFFAOYSA-N	CCC(C)(O)CCC1C=CC=CC=1		CCC(C)(O)CCC1C=CC=CC=1	10415-87-9	Benzenepropanol, .alpha.-ethyl-.alpha.-methyl-	178.275	-37.9268	-71.9016	Organic compounds	Benzenoids	Benzene and substituted derivatives				1.51652	0.299173	2.24701	0.510875			1.25556	0.0122382	2.17524	0.592314
AEJVUKBFJZTFCE-UHFFFAOYSA-N	COc1c(c(=O)c2ccc3[s]c4ccccc4c4ccc1c2c43)C1C=CC=CC=1		COc1c(c(=O)c2ccc3[s]c4ccccc4c4ccc1c2c43)C1C=CC=CC=1	35826-82-5	1-Methoxy-2-phenyl-3H-naphtho(2,1,8-mna)thioxanthen-3-one	392.479	-103.045	59.0987	Organic compounds	Benzenoids	Naphthalenes	Phenylnaphthalenes			0.997092	-2.65214	2.53812	0.701562			1.23739	-3.24921	2.91475	0.753235
AEKHFLDILSDXBL-UHFFFAOYSA-N	CNCC(C)O		CNCC(C)O	16667-45-1	1-(Methylamino)propan-2-ol	89.138	108.323	-97.3596	Organic compounds	Organic nitrogen compounds	Organonitrogen compounds	Amines			1.83269	0.68816	2.6686	0.569869			1.58655	0.296659	2.70433	0.574444
AEKIJKSVXKWGRJ-BYPYZUCNSA-N	NC(C[n]1cc(Br)c(=O)[nH]c1=O)C(O)=O		NC(C[n]1cc(Br)c(=O)[nH]c1=O)C(O)=O	19772-78-2	5-Bromo-S-willardiine	278.062	21.9701	-57.9689	Organic compounds	Organic acids and derivatives	Carboxylic acids and derivatives	Amino acids, peptides, and analogues			1.5999	-0.413949	2.56287	0.737762			1.15446	-0.390731	2.45222	0.709751
AEKJTLISCSMKLR-UHFFFAOYSA-N	S=C(C1C=CC=CC=1)N1CCOCC1		S=C(C1C=CC=CC=1)N1CCOCC1	2032-36-2	Morpholine, 4-(thiobenzoyl)-	207.298	8.13979	43.1615	Organic compounds	Organoheterocyclic compounds	Oxazinanes	Morpholines			0.781982	-0.460826	2.02832	0.668886			0.727994	-0.470169	1.97526	0.685576
AEKNYBWUEYNWMJ-QWOOXDRHSA-N	CC(C)N1CCN(C1=O)C1=CC=C(C=C1)N1CCN(CC1)C1=CC=C(C=C1)OCC1OC(CN2C=NC=N2)(CO1)C1=CC=C(F)C=C1F		CC(C)N1CCN(C1=O)C1=CC=C(C=C1)N1CCN(CC1)C1=CC=C(C=C1)OCC1OC(CN2C=NC=N2)(CO1)C1=CC=C(F)C=C1F	219923-85-0	Pramiconazole	659.738	-15.1686	-17.1029	Organic compounds	Organoheterocyclic compounds	Diazinanes	Piperazines			1.80619	-0.360324	2.65975	0.690814			1.17385	-0.354591	2.59354	0.694099
AEKOWUCMHAZKCM-UHFFFAOYSA-N	NC(=O)C1(CCN(CC2C=CC=CC=2)CC1)NC1C=CC(Cl)=CC=1		NC(=O)C1(CCN(CC2C=CC=CC=2)CC1)NC1C=CC(Cl)=CC=1	1045-51-8	1-Benzyl-4-((4-chlorophenyl)amino)piperidine-4-carboxamide	343.858	21.4762	64.3228	Organic compounds	Organoheterocyclic compounds	Piperidines	Benzylpiperidines			1.14878	-0.22372	2.3696	0.723137			0.805497	-0.360762	2.18199	0.724793
AEKQMJRJRAHOAP-CYBMUJFWSA-N	CC1C2=CC=CC=C2N2C(=O)C(CC3N=CNC=3C)CCC2=1		CC1C2=CC=CC=C2N2C(=O)C(CC3N=CNC=3C)CCC2=1	129300-27-2	Fabesetron	293.37	-71.6805	78.1029	Organic compounds	Organoheterocyclic compounds	Indoles and derivatives	Indoles			1.47115	0.129477	2.35877	0.78608			0.828464	-0.619515	2.17337	0.787147
AEKSGHBVWJHELW-UHFFFAOYSA-N	ClC1C=CC=C2OC3C=CC=C(Cl)C=3C=12		ClC1C=CC=C2OC3C=CC=C(Cl)C=3C=12	70648-14-5	1,9-Dichlorodibenzofuran	237.085	-158.485	53.0742	Organic compounds	Organoheterocyclic compounds	Benzofurans	Dibenzofurans			1.17644	-0.789888	2.38536	0.643283			0.812494	-4.45879	2.10067	0.588971
AEKUTGHCFFTAFE-UHFFFAOYSA-N	C=O.NC(N)=O.OC1=CC=CO1	NC(=O)N.C=O	OC1=CC=CO1	100424-73-5	Urea, polymer with formaldehyde and furanol	84.074	4.73448	-25.5717	Organic compounds	Organoheterocyclic compounds	Heteroaromatic compounds				1.37175	0.00558323	2.24592	0.694714			1.09738	-0.265872	2.26252	0.649649
AEKVBBNGWBBYLL-UHFFFAOYSA-N	N#CC1C=CC(F)=CC=1		N#CC1C=CC(F)=CC=1	1194-02-1	4-Fluorobenzonitrile	121.114	-70.0333	-36.3837	Organic compounds	Benzenoids	Benzene and substituted derivatives	Benzonitriles			1.30789	-0.574295	2.18843	0.65448			0.465888	-1.04848	1.99076	0.673169
AEKVVFWCBKEYSC-UHFFFAOYSA-N	CCC1CN2C=C(N=C2O1)[N+]([O-])=O		CCC1CN2C=C(N=C2O1)[N+]([O-])=O	127692-13-1	2-Ethyl-6-nitro-2,3-dihydroimidazo[2,1-b][1,3]oxazole	183.167	-114.798	5.25305	Organic compounds	Organoheterocyclic compounds	Azoles	Imidazoles			1.61431	-0.0485454	2.47676	0.764666			0.623353	-1.0521	2.22799	0.762956
AEKZEKVVJXLCSI-UHFFFAOYSA-N	O=S(=O)(C1=CC=CC2=CC=CC=C21)C1=CC=CC2=CC=CC=C21		O=S(=O)(C1=CC=CC2=CC=CC=C21)C1=CC=CC2=CC=CC=C21	13250-03-8	["1,1'-Sulfonyldinaphthalene"]	318.397	-139.861	-19.3788	Organic compounds	Benzenoids	Naphthalenes				1.70804	-0.090054	2.51685	0.610575			1.04747	-0.603873	2.39077	0.61775
AELBCMJIOOTPOA-UHFFFAOYNA-N	OC1N=CNC=1CCC=O		OC1N=CNC=1CCC=O	17340-16-8	4,5-Dihydro-5-oxo-1H-imidazole-4-propanoic acid	140.142	-19.2628	34.9691	Organic compounds	Organoheterocyclic compounds	Azoles	Imidazoles			1.73478	0.0139613	2.46921	0.769154			1.18903	-0.218228	2.59062	0.76818
AELCINSCMGFISI-DTWKUNHWSA-N	NC1CC1C1C=CC=CC=1		NC1CC1C1C=CC=CC=1	155-09-9	Tranylcypromine	133.194	31.9099	83.1476	Organic compounds	Organic nitrogen compounds	Organonitrogen compounds	Amines			1.30705	-0.784257	2.13609	0.698501			0.997322	-0.488728	1.98511	0.679092
AELCINSCMGFISI-RKDXNWHRSA-N	NC1CC1C1C=CC=CC=1		NC1CC1C1C=CC=CC=1	13531-35-6	Tranylcypromine, cis-	133.194	31.9103	83.149	Organic compounds	Organic nitrogen compounds	Organonitrogen compounds	Amines			1.30705	-0.784257	2.13609	0.698501			0.997322	-0.488728	1.98511	0.679092
AELCINSCMGFISI-UHFFFAOYSA-N	NC1CC1C1C=CC=CC=1		NC1CC1C1C=CC=CC=1	54-97-7	2-Phenylcyclopropan-1-amine	133.194	31.9107	83.1481	Organic compounds	Organic nitrogen compounds	Organonitrogen compounds	Amines			1.30705	-0.784257	2.13609	0.698501			0.997322	-0.488728	1.98511	0.679092
AELFAHXWAPNOLB-UHFFFAOYSA-N	CN(C)C1C=CC(C=CC2C=CC(=CC=2)N=C=S)=CC=1		CN(C)C1C=CC(C=CC2C=CC(=CC=2)N=C=S)=CC=1	17816-11-4	Benzenamine, 4-[2-(4-isothiocyanatophenyl)ethenyl]-N,N-dimethyl-	280.396	-138.717	-57.9522	Organic compounds	Phenylpropanoids and polyketides	Stilbenes				1.11499	-0.494597	2.5754	0.703344			0.76067	-0.676535	2.17054	0.681632
AELGMZGCKUBNBA-UHFFFAOYSA-M	[Na+].CCCCCCCCCCCCCC(=O)N(CCS([O-])(=O)=O)C1CCCCC1	[Na+]	CCCCCCCCCCCCCC(=O)N(CCS(O)(=O)=O)C1CCCCC1	63217-16-3	Ethanesulfonic acid, 2-[cyclohexyl(1-oxotetradecyl)amino]-, sodium salt	417.656	74.4077	-31.4628	Organic compounds	Lipids and lipid-like molecules	Fatty Acyls	Fatty amides			2.04536	0.663296	2.73427	0.632			1.42223	-0.160162	2.51773	0.655
AELILMBZWCGOSB-UHFFFAOYSA-N	OC(=O)CC1=CSC=C1NC1C(Cl)=CC=CC=1Cl		OC(=O)CC1=CSC=C1NC1C(Cl)=CC=CC=1Cl	72895-88-6	Eltenac	302.182	-80.123	-32.2487	Organic compounds	Benzenoids	Benzene and substituted derivatives	Halobenzenes			1.36604	-0.293675	2.49365	0.680386			0.835685	-0.30419	2.18899	0.707671
AELWOFMTABHNQJ-UHFFFAOYSA-M	[Br-].CCCCCCCCCCC[P+](C1C=CC=CC=1)(C1C=CC=CC=1)C1C=CC=CC=1	[Br-]	CCCCCCCCCCCP(C1C=CC=CC=1)(C1C=CC=CC=1)C1C=CC=CC=1	60669-22-9	Triphenyl(undecyl)phosphanium bromide	418.605	-13.6263	-99.194	Organic compounds	Benzenoids	Benzene and substituted derivatives	Phenylphosphines and derivatives			1.38716	-0.295693	2.54302	0.551516			1.17852	-0.911039	2.66812	0.621734
AEMBWNDIEFEPTH-UHFFFAOYSA-N	CCN(N=O)C(C)(C)C		CCN(N=O)C(C)(C)C	3398-69-4	tert-Butylamine, N-ethyl-N-nitroso-	130.191	93.0582	-88.9931	Organic compounds	Organic nitrogen compounds	Organonitrogen compounds	Organic nitroso compounds			1.65764	0.490623	2.40092	0.774873			0.531493	-1.98685	2.0516	0.760411
AEMCQEISPZGGFJ-UHFFFAOYSA-N	CC1(C)C(C1C=C(Br)Br)C(=O)OCC1C=C(CC2C=CC=CC=2)OC=1		CC1(C)C(C1C=C(Br)Br)C(=O)OCC1C=C(CC2C=CC=CC=2)OC=1	42789-03-7	Bromethrin	468.185	79.2649	8.56138	Organic compounds	Benzenoids	Benzene and substituted derivatives				1.04679	-1.07296	2.35015	0.504602			0.372033	-3.09987	2.15083	0.468043
AEMFNILZOJDQLW-APWQULEDSA-N	CC12CCC3C(CC=C4CC(=O)CCC43C)C1CCC2=O		CC12CCC3C(CC=C4CC(=O)CCC43C)C1CCC2=O	571-45-9	Retroandrostenedione	286.415	118.985	118.503	Organic compounds	Lipids and lipid-like molecules	Steroids and steroid derivatives	Androstane steroids			1.63986	-3.47127	2.57581	0.615006	0.169566	0.169566	0.458358	-0.935223	1.72811	0.549764
AEMFNILZOJDQLW-BGJMDTOESA-N	CC12CCC3C(CC=C4CC(=O)CCC43C)C1CCC2=O		CC12CCC3C(CC=C4CC(=O)CCC43C)C1CCC2=O	18485-76-2	Androst-4-ene-3,17-dione, (13alpha)-	286.415	118.984	118.502	Organic compounds	Lipids and lipid-like molecules	Steroids and steroid derivatives	Androstane steroids			1.63986	-3.47127	2.57581	0.615006	0.169566	0.169566	0.458358	-0.935223	1.72811	0.549764
AEMFNILZOJDQLW-QAGGRKNESA-N	CC12CCC3C(CC=C4CC(=O)CCC43C)C1CCC2=O		CC12CCC3C(CC=C4CC(=O)CCC43C)C1CCC2=O	63-05-8	4-Androstene-3,17-dione	286.415	118.985	118.503	Organic compounds	Lipids and lipid-like molecules	Steroids and steroid derivatives	Androstane steroids			1.63986	-3.47127	2.57581	0.615006	0.169566	0.169566	0.458358	-0.935223	1.72811	0.549764
AEMKPSYXSVLTAJ-UHFFFAOYSA-N	Cc1c(Cl)c(=O)oc2cc(ccc12)OC		Cc1c(Cl)c(=O)oc2cc(ccc12)OC	28045-90-1	2H-1-Benzopyran-2-one, 3-chloro-7-methoxy-4-methyl-	224.643	-79.5253	115.974	Organic compounds	Phenylpropanoids and polyketides	Coumarins and derivatives				1.17032	-0.450191	2.36621	0.635611			0.829337	-0.433111	2.1285	0.629384
AEMLYYQEBPJIEO-UHFFFAOYSA-N	Cl.Cl.CN(C)CCN1C(=O)C2C=C(N)C=C3C=CC=C(C3=2)C1=O	Cl	CN(C)CCN1C(=O)C2C=C(N)C=C3C=CC=C(C3=2)C1=O	150091-68-2	Amonafide dihydrochloride	283.331	-47.0209	57.6715	Organic compounds	Organoheterocyclic compounds	Isoquinolines and derivatives	Isoquinolones and derivatives			1.76093	0.215821	2.51326	0.700125			0.921722	-0.500089	2.3703	0.727211
AEMNOPYAEDEKIP-UHFFFAOYSA-N	N#CCCOCCN(CCC#N)C1C=CC=CC=1		N#CCCOCCN(CCC#N)C1C=CC=CC=1	27419-90-5	Propanenitrile, 3-[[2-(2-cyanoethoxy)ethyl]phenylamino]-	243.31	-119.453	-76.1558	Organic compounds	Organic nitrogen compounds	Organonitrogen compounds	Amines			1.37691	0.149036	2.38358	0.716874			0.82375	-0.396605	2.17124	0.722857
AEMOLEFTQBMNLQ-AQKNRBDQSA-N	OC1OC(C(O)C(O)C1O)C(O)=O		OC1OC(C(O)C(O)C1O)C(O)=O	528-16-5	D-Glucopyranuronic acid	194.139	38.2931	149.313	Organic compounds	Organic oxygen compounds	Organooxygen compounds	Carbohydrates and carbohydrate conjugates			1.98208	0.667411	2.64753	0.76507			1.98878	-0.312855	3.03443	0.762196
AEMOLEFTQBMNLQ-BKBMJHBISA-N	OC1OC(C(O)C(O)C1O)C(O)=O		OC1OC(C(O)C(O)C1O)C(O)=O	6294-16-2	alpha-D-Galacturonic acid	194.139	38.2925	149.317	Organic compounds	Organic oxygen compounds	Organooxygen compounds	Carbohydrates and carbohydrate conjugates			1.98208	0.667411	2.64753	0.76507			1.98878	-0.312855	3.03443	0.762196
AEMOLEFTQBMNLQ-HNFCZKTMSA-N	OC1OC(C(O)C(O)C1O)C(O)=O		OC1OC(C(O)C(O)C1O)C(O)=O	2073-35-0	Hexopyranuronato	194.139	38.2926	149.312	Organic compounds	Organic oxygen compounds	Organooxygen compounds	Carbohydrates and carbohydrate conjugates			1.98208	0.667411	2.64753	0.76507			1.98878	-0.312855	3.03443	0.762196
AEMOLEFTQBMNLQ-VCSGLWQLSA-N	OC1OC(C(O)C(O)C1O)C(O)=O		OC1OC(C(O)C(O)C1O)C(O)=O	71031-08-8	Î±-L-Idopyranuronic acid	194.139	38.2919	149.315	Organic compounds	Organic oxygen compounds	Organooxygen compounds	Carbohydrates and carbohydrate conjugates			1.98208	0.667411	2.64753	0.76507			1.98878	-0.312855	3.03443	0.762196
AEMOLEFTQBMNLQ-WAXACMCWSA-N	OC1OC(C(O)C(O)C1O)C(O)=O		OC1OC(C(O)C(O)C1O)C(O)=O	70021-34-0	alpha-D-Glucuronic acid	194.139	38.292	149.315	Organic compounds	Organic oxygen compounds	Organooxygen compounds	Carbohydrates and carbohydrate conjugates			1.98208	0.667411	2.64753	0.76507			1.98878	-0.312855	3.03443	0.762196
AEMOLEFTQBMNLQ-YMDCURPLSA-N	OC1OC(C(O)C(O)C1O)C(O)=O		OC1OC(C(O)C(O)C1O)C(O)=O	552-12-5	D-Galactopyranuronic acid	194.139	38.2932	149.314	Organic compounds	Organic oxygen compounds	Organooxygen compounds	Carbohydrates and carbohydrate conjugates			1.98208	0.667411	2.64753	0.76507			1.98878	-0.312855	3.03443	0.762196
AEMQSBVTDQQBGB-UHFFFAOYSA-N	CC(=O)NC1=CC=CC=C1N=O		CC(=O)NC1=CC=CC=C1N=O	21354-01-8	Acetamide, N-(2-nitrosophenyl)-	164.164	-87.1864	-38.7974	Organic compounds	Benzenoids	Benzene and substituted derivatives	Anilides			1.69475	0.403715	2.42394	0.638994			0.991378	-0.568053	2.20597	0.650105
AEMRFAOFKBGASW-UHFFFAOYSA-N	OCC(O)=O		OCC(O)=O	79-14-1	Glycolic acid	76.051	75.2146	-55.2067	Organic compounds	Organic acids and derivatives	Hydroxy acids and derivatives	Alpha hydroxy acids and derivatives	1.94958	1.94958	1.57778	0.284187	2.39499	0.430769	1.74425	1.74425	1.49849	-1.50849	2.62846	0.430769
AENHELBNWFOSNH-UHFFFAOYSA-N	Oc1[nH]c(=S)[nH]c(=O)c1CC1C=CC=CC=1		Oc1[nH]c(=S)[nH]c(=O)c1CC1C=CC=CC=1	15018-53-8	MLS002707070	234.28	-9.44036	21.7009	Organic compounds	Organoheterocyclic compounds	Diazines	Pyrimidines and pyrimidine derivatives			1.14706	-0.409061	2.35646	0.689894			0.919033	-0.350209	2.17295	0.703111
AENHPCRNEPBZQL-UHFFFAOYSA-N	FC(F)(F)C(F)(F)C(F)(F)C(F)(F)C(F)(F)C(F)(F)C(F)(F)C(F)(F)CC(I)[Si]12OCCN(CCO1)CCO2		FC(F)(F)C(F)(F)C(F)(F)C(F)(F)C(F)(F)C(F)(F)C(F)(F)C(F)(F)CC(I)[Si]12OCCN(CCO1)CCO2	135587-17-6	1-(3,3,4,4,5,5,6,6,7,7,8,8,9,9,10,10,10-Heptadecafluoro-1-iododecyl)-2,8,9-trioxa-5-aza-1-silabicyclo[3.3.3]undecane	747.256	17.0337	-171.012	Organic compounds	Organometallic compounds	Organometalloid compounds	Organosilicon compounds			1.15784	-0.950653	2.82304	0.743794			0.492194	-2.62255	2.34453	0.75297
AENIJTCZYLYYCX-UHFFFAOYSA-L	[Na+].[Na+].NC1=CC=C2C=C(C=C(O)C2=C1N=NC1=CC=C(C=C1S([O-])(=O)=O)NC(=O)C1C=C(Cl)C=CC=1)S([O-])(=O)=O	[Na+]	NC1C=CC2C=C(C=C(O)C=2C=1N=NC1C=CC(=CC=1S(O)(=O)=O)NC(=O)C1C=C(Cl)C=CC=1)S(O)(=O)=O	67875-07-4	2-Naphthalenesulfonic acid, 6-amino-5-[2-[4-[(3-chlorobenzoyl)amino]-2-sulfophenyl]diazenyl]-4-hydroxy-, sodium salt (1:2)	576.996	-171.695	-24.5031	Organic compounds	Benzenoids	Naphthalenes	Naphthalene sulfonic acids and derivatives			2.24197	1.27974	2.83801	0.534755			2.07602	0.67272	2.84173	0.644038
AENIZEZXKCBOIO-UHFFFAOYSA-N	C[n]1c(C)cc(=O)[n]1C1C=CC(=CC=1)[N+]([O-])=O		C[n]1c(C)cc(=O)[n]1C1C=CC(=CC=1)[N+]([O-])=O	30672-30-1	2,3-Dimethyl-1-(4-nitrophenyl)-3-pyrazolin-5-one	233.227	-118.387	9.90821	Organic compounds	Organoheterocyclic compounds	Azoles	Pyrazoles			1.71543	0.119952	2.48641	0.60747			0.724288	-0.710956	2.24347	0.593044
AENMRVKTNNJRNW-UHFFFAOYSA-N	OS(=O)(=O)C1C=CC(=CC=1)[n]1c(=S)[nH]c2ccccc2c1=O		OS(=O)(=O)C1C=CC(=CC=1)[n]1c(=S)[nH]c2ccccc2c1=O	34330-07-9	4-(1,4-Dihydro-4-oxo-2-thioxo-3(2H)-quinazolinyl)benzenesulphonic acid	334.378	-79.8892	69.9558	Organic compounds	Organoheterocyclic compounds	Diazanaphthalenes	Benzodiazines			1.7065	-0.218491	2.53577	0.65179			1.13086	-0.272623	2.40223	0.683136
AENOKLOQCCSDAZ-UHFFFAOYSA-N	Cl.NCCCCCC(O)=O	Cl	NCCCCCC(O)=O	4321-58-8	Aminocaproic acid hydrochloride	131.175	74.7915	-46.9424	Organic compounds	Lipids and lipid-like molecules	Fatty Acyls	Fatty acids and conjugates			1.91308	0.640287	2.62806	0.279144			2.06393	0.87198	2.85788	0.247059
AENXFXORLQIJDC-UHFFFAOYSA-N	Cl.Cl.CCN(CCOC(=O)C(C1C=CC=CC=1)N1CCCCC1)CC	Cl	CCN(CCOC(=O)C(C1C=CC=CC=1)N1CCCCC1)CC	2691-46-5	2-(Diethylamino)ethyl phenyl(piperidin-1-yl)acetate--hydrogen chloride (1/2)	318.461	21.4049	45.0125	Organic compounds	Organic acids and derivatives	Carboxylic acids and derivatives	Amino acids, peptides, and analogues			1.63917	-0.0192962	2.44032	0.688769			0.883543	-0.228769	2.34862	0.713018
AENXIAWIJGWYCP-UHFFFAOYNA-N	COC1C=CC(=CC=1)C1CC(=O)C2C(OC)=C(OC)C(=CC=2O1)OC		COC1C=CC(=CC=1)C1CC(=O)C2C(OC)=C(OC)C(=CC=2O1)OC	2569-77-9	2,3-Dihydro-5,6,7-trimethoxy-2-(4-methoxyphenyl)-4H-1-benzopyran-4-one	344.363	2.38041	139.928	Organic compounds	Phenylpropanoids and polyketides	Flavonoids	O-methylated flavonoids			1.78961	0.169728	2.64339	0.699019			0.683322	-1.75202	2.39014	0.708542
AEOBEOJCBAYXBA-KQYNXXCUSA-N	NC1=NC=NC2=C1N=CN2C1OC(COP(O)(O)=O)C(O)C1OP(O)(O)=O		NC1=NC=NC2=C1N=CN2C1OC(COP(O)(O)=O)C(O)C1OP(O)(O)=O	3805-37-6	9-(2,5-Di-O-phosphonopentofuranosyl)-9H-purin-6-amine	427.203	33.0058	127.012	Organic compounds	Nucleosides, nucleotides, and analogues	Purine nucleotides	Purine ribonucleotides			1.74851	-1.04284	2.58762	0.804883			1.04422	-1.60682	3.01618	0.825873
AEOCXXJPGCBFJA-UHFFFAOYSA-N	CCC1=CC(=CC=N1)C(N)=S		CCC1=CC(=CC=N1)C(N)=S	536-33-4	Ethionamide	166.249	-34.0197	-4.90928	Organic compounds	Organoheterocyclic compounds	Pyridines and derivatives				0.723717	-0.771342	4.02173	0.773918			0.732505	-0.61954	1.92619	0.781434
AEOGOPZZLSQJKM-UHFFFAOYSA-N	CC(C)(CNC1C=C(CCC)C(=NN=1)C1C=CC=CC=1)N(CC)CC.CC(C)(CNC1C=C(CCC)C(=NN=1)C1C=CC=CC=1)N(CC)CC.OC(=O)C=CC(O)=O.OC(=O)C=CC(O)=O.OC(=O)C=CC(O)=O	OC(C=CC(=O)O)=O	CCCC1=CC(NCC(C)(C)N(CC)CC)=NN=C1C1C=CC=CC=1	137733-33-6	But-2-enedioic acid--N~2~,N~2~-diethyl-2-methyl-N~1~-(6-phenyl-5-propylpyridazin-3-yl)propane-1,2-diamine (3/2)	340.515	9.81211	-103.301	Organic compounds	Organoheterocyclic compounds	Diazines	Pyridazines and derivatives			1.27755	-0.00563965	2.32042	0.771948			0.703688	-0.242828	2.1747	0.763764
AEOOKQQYROTMQW-UHFFFAOYSA-N	C=CC(=O)OC1C(CO)C2CC1C1CC(OC(=O)C=C)C(CO)C12		C=CC(=O)OC1C(CO)C2CC1C1CC(OC(=O)C=C)C(CO)C12	85409-82-1	1,6-Bis(hydroxymethyl)octahydro-1H-4,7-methanoindene-2,5-diyl diprop-2-enoate	336.384	114.567	58.6374	Organic compounds	Lipids and lipid-like molecules	Prenol lipids	Monoterpenoids			1.94657	0.281302	2.59725	0.694806			1.16039	-1.6594	2.48173	0.722528
AEOOLRRTECSMIN-UHFFFAOYSA-N	CNC1CCN2C3=C1C=CC=C3CCC1=CC=CC=C21		CNC1CCN2C3=C1C=CC=C3CCC1=CC=CC=C21	33545-56-1	N-Methyl-2,3,7,8-tetrahydro-1H-quinolino[1,8-ab][1]benzazepin-3-amine	264.372	-19.8742	79.8269	Organic compounds	Organoheterocyclic compounds	Benzazepines	Dibenzazepines			1.073	-0.552725	2.17267	0.779512			0.587541	-0.851553	1.98487	0.762979
AEOWXQHGSWPUER-UHFFFAOYSA-N	C=CC(=O)NCCN1CCNC1=O		C=CC(=O)NCCN1CCNC1=O	3089-22-3	N-(2-(2-Oxoimidazolidin-1-yl)ethyl)acrylamide	183.211	50.9399	23.9289	Organic compounds	Organoheterocyclic compounds	Azolidines	Imidazolidines			1.72046	-0.228136	2.46163	0.591154			1.01909	-0.323563	2.26304	0.718774
AEPBOUHKRSABGU-UHFFFAOYSA-N	Cl.CC(C)(C#CCNCC)OC(=O)C(O)(C1CCCCC1)C1C=CC=CC=1	Cl	CC(C)(C#CCNCC)OC(=O)C(O)(C1CCCCC1)C1C=CC=CC=1	129927-37-3	5-(Ethylamino)-2-methylpent-3-yn-2-yl cyclohexyl(hydroxy)phenylacetate--hydrogen chloride (1/1)	357.494	27.3454	47.2962	Organic compounds	Benzenoids	Benzene and substituted derivatives				1.598	-0.0489668	2.52442	0.721454			0.871869	-3.34361	2.43881	0.7347
AEPJJSIKAPYQBL-UHFFFAOYSA-N	COC1C=CC(=CC=1)C(=O)CC(C1CCCCC1=O)C1C=CC=CC=1		COC1C=CC(=CC=1)C(=O)CC(C1CCCCC1=O)C1C=CC=CC=1	73669-78-0	2-[3-(4-Methoxyphenyl)-3-oxo-1-phenylpropyl]cyclohexanone	336.431	20.0215	35.7709	Organic compounds	Phenylpropanoids and polyketides	Linear 1,3-diarylpropanoids	Chalcones and dihydrochalcones			1.66714	0.278736	2.502	0.690291			1.04412	-0.155491	2.34247	0.68801
AEPONBGLDZUAGO-SFQUDFHCSA-N	CC(=NNS(=O)(=O)C1C=CC=CC=1)C1C=C2OCCOC2=CC=1		CC(N=NS(=O)(=O)C1C=CC=CC=1)C1C=C2OCCOC2=CC=1	6458-66-8	T5317524	332.381	1.76139	117.224	Organic compounds	Benzenoids	Benzene and substituted derivatives	Benzenesulfonamides			1.75425	0.176454	2.56123	0.7409			1.07887	-0.2615	2.41315	0.747297
AEPQMVYWWGIIJE-UHFFFAOYSA-N	Cl.Cl.CCN1CCCC1CNC(=O)C1=CC2NN=NC=2C=C1OC	Cl	CCN1CCCC1CNC(=O)C1=CC2NN=NC=2C=C1OC	23519-20-2	N-[(1-Ethylpyrrolidin-2-yl)methyl]-5-methoxy-1H-benzotriazole-6-carboximidic acid--hydrogen chloride (1/2)	303.366	-2.60832	93.0352	Organic compounds	Organoheterocyclic compounds	Benzotriazoles				1.6632	-0.165668	2.49874	0.777061			1.06225	-0.281331	2.36025	0.772464
AEPQXGFMAZTUEA-UHFFFAOYSA-N	CC1C(=C(C)C(C)=C(C=1C)[N+]([O-])=O)[N+]([O-])=O		CC1C(=C(C)C(C)=C(C=1C)[N+]([O-])=O)[N+]([O-])=O	5465-13-4	1,2,4,5-Tetramethyl-3,6-dinitrobenzene	224.216	-138.537	21.2731	Organic compounds	Benzenoids	Benzene and substituted derivatives	Nitrobenzenes			1.59693	0.105288	2.54523	0.606552			0.532061	-0.773326	2.25511	0.576834
AEPUKSBIJZXFCI-UHFFFAOYSA-N	O=C(CCCCCCCC(=O)OCC1C=CC=CC=1)OCC1C=CC=CC=1		O=C(CCCCCCCC(=O)OCC1C=CC=CC=1)OCC1C=CC=CC=1	1932-84-9	Nonanedioic acid, bis(phenylmethyl) ester	368.473	7.99271	-46.2833	Organic compounds	Benzenoids	Benzene and substituted derivatives	Benzyloxycarbonyls			2.0455	0.795049	2.65925	0.395			1.7838	0.436123	2.7563	0.480571
AEPVNIIEAIDSSS-UHFFFAOYSA-M	[Na+].COC1=CC=C(C=C1OC)C(O)S([O-])(=O)=O	[Na+]	COC1C=CC(=CC=1OC)C(O)S(O)(=O)=O	68413-92-3	Benzenemethanesulfonic acid, .alpha.-hydroxy-3,4-dimethoxy-, sodium salt (1:1)	248.256	-19.8141	110.905	Organic compounds	Benzenoids	Benzene and substituted derivatives	Methoxybenzenes			1.84935	0.242963	2.54365	0.653223			1.39143	-0.400247	2.51372	0.686738
AEPWOCLBLLCOGZ-UHFFFAOYSA-N	C=CC(=O)OCCC#N		C=CC(=O)OCCC#N	106-71-8	2-Cyanoethyl prop-2-enoate	125.127	108.557	0.701499	Organic compounds	Organic acids and derivatives	Carboxylic acids and derivatives	Acrylic acids and derivatives			1.52854	-0.0492461	2.30791	0.456076			0.989695	-0.253097	2.25243	0.510146
AEQAMCGEBHCRLA-UHFFFAOYSA-N	CCOC(=S)SSSSC(=S)OCC		CCOC(=S)SSSSC(=S)OCC	1851-71-4	Formic acid, tetrathiobis(thio-, O,O-diethyl ester	306.546	97.8524	-13.0247	Organic compounds	Organosulfur compounds	Sulfenyl compounds				0.926745	-1.2242	2.72149	0.653552			0.488477	-2.71605	2.10447	0.656633
AEQCVZZDIWEQSV-UHFFFAOYSA-N	CCCCCCCCCCCCCC(=O)OCCC(CO)(COC(=O)CCCCCCCCCCCCC)COC(=O)CCCCCCCCCCCCC		CCCCCCCCCCCCCC(=O)OCCC(CO)(COC(=O)CCCCCCCCCCCCC)COC(=O)CCCCCCCCCCCCC	68818-68-8	2-(Hydroxymethyl)-2-[(tetradecanoyloxy)methyl]butane-1,4-diyl ditetradecanoate	781.257	156.781	-4.62941	Organic compounds	Organic acids and derivatives	Carboxylic acids and derivatives	Tricarboxylic acids and derivatives			2.47383	1.34806	2.98982	0.371793			2.44697	0.726378	3.40497	0.386218
AEQDJSLRWYMAQI-KRWDZBQOSA-N	COC1=CC2C3CC4=CC=C(OC)C(OC)=C4CN3CCC=2C=C1OC		COC1=CC2C3CC4=CC=C(OC)C(OC)=C4CN3CCC=2C=C1OC	483-14-7	(-)-S-Tetrahydropalmatine	355.434	-18.6404	136.584	Organic compounds	Alkaloids and derivatives	Protoberberine alkaloids and derivatives				1.27135	-2.7655	2.35198	0.767514			0.696454	-0.925694	2.23275	0.74355
AEQDJSLRWYMAQI-QGZVFWFLSA-N	COC1=CC2C3CC4=CC=C(OC)C(OC)=C4CN3CCC=2C=C1OC		COC1=CC2C3CC4=CC=C(OC)C(OC)=C4CN3CCC=2C=C1OC	3520-14-7	D-Tetrahydropalmatine	355.434	-18.6419	136.583	Organic compounds	Alkaloids and derivatives	Protoberberine alkaloids and derivatives				1.27135	-2.7655	2.35198	0.767514			0.696454	-0.925694	2.23275	0.74355
AEQDJSLRWYMAQI-UHFFFAOYSA-N	COC1=CC2C3CC4=CC=C(OC)C(OC)=C4CN3CCC=2C=C1OC		COC1=CC2C3CC4=CC=C(OC)C(OC)=C4CN3CCC=2C=C1OC	2934-97-6	Tetrahydropalmatine	355.434	-18.6412	136.584	Organic compounds	Alkaloids and derivatives	Protoberberine alkaloids and derivatives				1.27135	-2.7655	2.35198	0.767514			0.696454	-0.925694	2.23275	0.74355
AEQFSUDEHCCHBT-UHFFFAOYSA-M	[Na+].CCCC(CCC)C([O-])=O	[Na+]	CCCC(CCC)C(O)=O	1069-66-5	Sodium valproate	144.214	115.097	-43.9775	Organic compounds	Lipids and lipid-like molecules	Fatty Acyls	Fatty acids and conjugates	1.57172		1.78489	0.689978	2.42948	0.322155	1.76788		1.54541	0.574207	2.73325	0.469588
AEQHIERKWLPMQK-UHFFFAOYSA-N	Cl.NC1=CC=C2CCNC2=C1	Cl	NC1=CC=C2CCNC2=C1	28228-73-1	2,3-Dihydro-1H-indol-6-amine--hydrogen chloride (1/1)	134.182	-29.2034	75.1892	Organic compounds	Organoheterocyclic compounds	Indoles and derivatives	Indolines			1.16754	0.110998	2.17863	0.716447			0.868077	-0.787033	1.93584	0.708214
AEQJHMRWXRUFMH-UHFFFAOYSA-N	CC1C=CC=C(C=1)S(=O)(=O)NC(=O)NCCC		CC1C=CC=C(C=1)S(=O)(=O)NC(=O)NCCC	22956-54-3	Urea, 1-propyl-3-(m-tolylsulfonyl)-	256.327	-115.967	-54.5577	Organic compounds	Benzenoids	Benzene and substituted derivatives	Benzenesulfonamides			1.76496	0.302653	2.48261	0.661492			1.32755	-0.221482	2.48424	0.65497
AEQMIFRODRFTJF-SLFFLAALSA-N	CC1C=C2C(C(=O)C3C(=CC(=CC=3O)OC3OCC(O)(CO)C3O)C2=O)=C(O)C=1		CC1C=C2C(C(=O)C3C(=CC(=CC=3O)OC3OCC(O)(CO)C3O)C2=O)=C(O)C=1	14101-04-3	3-{[3,4-Dihydroxy-4-(hydroxymethyl)oxolan-2-yl]oxy}-1,8-dihydroxy-6-methylanthracene-9,10-dione	402.355	33.1793	157.251	Organic compounds	Benzenoids	Anthracenes	Anthraquinones			2.19789	0.813957	2.93285	0.725398			1.84435	-0.175691	3.06624	0.763409
AEQXCNSBJJHGGE-UHFFFAOYSA-N	COC1=CC=C(C=C1N(CCOC(C)=O)CCOC(C)=O)NC(C)=O		COC1=CC=C(C=C1N(CCOC(C)=O)CCOC(C)=O)NC(C)=O	23128-51-0	Acetamide, N-[3-[bis[2-(acetyloxy)ethyl]amino]-4-methoxyphenyl]-	352.387	-109.722	-67.4891	Organic compounds	Benzenoids	Benzene and substituted derivatives	Anilides			2.04997	0.438193	2.85595	0.673697			1.37934	-0.170116	2.59291	0.682832
AERBNCYCJBRYDG-KSZLIROESA-N	CCCCCCCCCCCCCCC(O)C(O)C(N)CO		CCCCCCCCCCCCCCC(O)C(O)C(N)CO	554-62-1	Phytosphingosine	317.514	135.68	-99.8962	Organic compounds	Organic nitrogen compounds	Organonitrogen compounds	Amines			1.91521	0.199952	2.77893	0.506897			2.09293	0.248707	3.18963	0.57877
AERDHXBXASVGBL-UHFFFAOYSA-N	CC(=O)C(CCCCCCC(O)=O)CCCCCCCCCO		CC(=O)C(CCCCCCC(O)=O)CCCCCCCCCO	60903-97-1	8-Acetyl-17-hydroxyheptadecanoic acid	328.493	85.2127	-42.4446	Organic compounds	Lipids and lipid-like molecules	Fatty Acyls	Fatty acids and conjugates			2.14393	1.02733	2.79093	0.5471			2.07241	0.709925	3.18976	0.538483
AERGGMDNGDDGPI-HOTGVXAUSA-N	C1CC(C1C1C=CC=CC=1)C1C=CC=CC=1		C1CC(C1C1C=CC=CC=1)C1C=CC=CC=1	20071-09-4	trans-1,2-Diphenylcyclobutane	208.304	32.1265	82.7702	Organic compounds	Phenylpropanoids and polyketides	Stilbenes				1.0508	-0.451792	2.16475	0.646667			0.786216	-0.799056	2.02299	0.632073
AERGGMDNGDDGPI-IYBDPMFKSA-N	C1CC(C1C1C=CC=CC=1)C1C=CC=CC=1		C1CC(C1C1C=CC=CC=1)C1C=CC=CC=1	7694-30-6	1,2-Diphenylcyclobutane, cis-	208.304	32.1269	82.77	Organic compounds	Phenylpropanoids and polyketides	Stilbenes				1.0508	-0.451792	2.16475	0.646667			0.786216	-0.799056	2.02299	0.632073
AERGGMDNGDDGPI-UHFFFAOYSA-N	C1CC(C1C1C=CC=CC=1)C1C=CC=CC=1		C1CC(C1C1C=CC=CC=1)C1C=CC=CC=1	3018-21-1	cyclobutane, 1,2-diphenyl-	208.304	32.1267	82.77	Organic compounds	Phenylpropanoids and polyketides	Stilbenes				1.0508	-0.451792	2.16475	0.646667			0.786216	-0.799056	2.02299	0.632073
AERIYSXEUIYKJJ-LREBCSMRSA-N	CSC1C=CC(=CC=1)OC1=CC=C(C=C1CN(C)C)S(N)(=O)=O.OC(=O)C(O)C(O)C(O)=O	OC(C(C(C(=O)O)O)O)=O	CSC1C=CC(=CC=1)OC1=CC=C(C=C1CN(C)C)S(N)(=O)=O	364323-49-9	CTK4H6457	352.481	-112.291	-28.7143	Organic compounds	Benzenoids	Benzene and substituted derivatives	Diphenylethers			0.976268	-0.756039	2.35763	0.725498			0.911051	-0.469546	1.98409	0.627579
AERLHOTUXIJQFV-RCPZPFRWSA-N	OC1=C2C3C=CC(C4C=CC43)C2=C(O)N1CCCCN1CCN(CC1)C1N=CC=CN=1		OC1=C2C3C=CC(C4C=CC43)C2=C(O)N1CCCCN1CCN(CC1)C1N=CC=CN=1	114298-18-9	Zalospirone	419.529	-4.53814	71.5574	Organic compounds	Organoheterocyclic compounds	Diazinanes	Piperazines			1.44076	-3.30537	2.51662	0.764934			0.832042	-3.25523	2.41679	0.786568
AERVMEVXZLZSML-UHFFFAOYSA-N	CC1(C)CC(CC(C)(C1)CNC(=O)N1CC(C)N=C1C)NC(=O)N1CC(C)N=C1C		CC1(C)CC(CC(C)(C1)CNC(=O)N1CC(C)N=C1C)NC(=O)N1CC(C)N=C1C	68975-78-0	1H-Imidazole-1-carboxamide, N-[3-[[[(4,5-dihydro-2,4-dimethyl-1H-imidazol-1-yl)carbonyl]amino]methyl]-3,5,5-trimethylcyclohexyl]-4,5-dihydro-2,4-dimethyl-	418.586	143.34	20.157	Organic compounds	Organoheterocyclic compounds	Azolines	Imidazolines			1.85489	0.268277	2.60975	0.763268			0.915224	-0.694502	2.43703	0.752982
AESBVFCMZQUTPY-UHFFFAOYSA-M	[Na+].CCCCCC1=CC=CC2C1=C(C=CC=2CCCC)S([O-])(=O)=O	[Na+]	CCCCCC1C=CC=C2C=1C(=CC=C2CCCC)S(O)(=O)=O	180294-41-1	1-Naphthalenesulfonic acid, 4,8-dibutyl-, sodium salt	334.481	-27.9178	-97.8751	Organic compounds	Benzenoids	Naphthalenes	Naphthalene sulfonic acids and derivatives			1.71454	0.452111	2.50465	0.555894			1.35782	-0.174495	2.38263	0.595728
AESFGSJWSUZRGW-UHFFFAOYSA-N	CC(=O)OC1=CC=C(C=C1OC(C)=O)OC(C)=O		CC(=O)OC1=CC=C(C=C1OC(C)=O)OC(C)=O	613-03-6	1,2,4-Triacetoxybenzene	252.222	-18.3629	-24.3866	Organic compounds	Benzenoids	Phenol esters				1.96865	0.620108	2.71545	0.622232			1.5676	-0.35045	2.59915	0.628502
AESHPAQQBZWZMS-UHFFFAOYSA-N	CCCCCCCCC=CCC=CCC=CCCCC(=O)OC		CCCCCCCCC=CCC=CCC=CCCCC(=O)OC	14602-39-2	Methyl icosa-5,8,11-trienoate	320.517	106.689	-25.2508	Organic compounds	Lipids and lipid-like molecules	Fatty Acyls	Fatty acid esters			2.09584	0.527643	2.74418	0.366667			2.03267	0.84902	2.89441	0.383333
AESJECFMHVOYGB-UHFFFAOYSA-N	CCCCCCCCCCCCCC[n]1cc(O)[nH]c1=O		CCCCCCCCCCCCCC[n]1cc(O)[nH]c1=O	85391-29-3	1-Tetradecylimidazolidine-2,4-dione	296.455	2.50239	23.2262	Organic compounds	Organoheterocyclic compounds	Azolidines	Imidazolidines			1.95655	0.51538	2.69952	0.657021			1.10334	-0.298334	2.43581	0.666702
AESJFNDOKWHJAH-UHFFFAOYSA-N	CC(CCC(O)=O)=NO		CC(CCC(O)=O)=NO	6945-36-4	4-(Hydroxyimino)pentanoic acid	131.131	79.4863	-50.1306	Organic compounds	Lipids and lipid-like molecules	Fatty Acyls	Fatty acids and conjugates			1.84989	0.605236	2.51045	0.596537			1.2692	0.00693647	2.50386	0.62381
AESMDVCWMVZFRQ-UHFFFAOYSA-L	[Ba+2].CCCC([O-])=O.CCCC([O-])=O	[Ba+2]	CCCC(O)=O	31416-33-8	Barium dibutyrate	88.106	89.6342	-56.8925	Organic compounds	Lipids and lipid-like molecules	Fatty Acyls	Fatty acids and conjugates			1.92578	0.774024	2.47969	0.41462			1.91733	0.667578	2.70824	0.41462
AESMHZVRTXLXHT-UHFFFAOYSA-N	[O-][N+](=O)C1=CC=CC=C1NC(=O)CC(=O)NC1=CC=CC=C1[N+]([O-])=O		[O-][N+](=O)C1=CC=CC=C1NC(=O)CC(=O)NC1=CC=CC=C1[N+]([O-])=O	96331-35-0	N~1~,N~3~-Bis(2-nitrophenyl)propanediamide	344.283	-122.383	19.8972	Organic compounds	Benzenoids	Benzene and substituted derivatives	Nitrobenzenes			2.11858	0.306655	2.84688	0.544682			1.51131	-0.56717	2.76549	0.566667
AESPUDMKMXMQNQ-UHFFFAOYNA-N	[Cl-].CC(C)CCCCCCCCCCCCCCC(=O)NCCC[N+]1(CC2CO2)CCOCC1	[Cl-]	CC(C)CCCCCCCCCCCCCCC(=O)NCCC[N+]1(CC2CO2)CCOCC1	220895-61-4	Isostearamidopropyl epoxypropylmorpholinium chloride	467.759	50.5498	-35.2243	Organic compounds	Organoheterocyclic compounds	Oxazinanes	Morpholines			1.93718	0.326285	2.76976	0.689661			1.02005	-0.253643	2.62968	0.711837
AESQUTRXAMDOSL-UHFFFAOYSA-N	OC(=O)C1C=CC(=CC=1)NC(=O)N(CC1C=CC=CC=1)CC1C=CC=CC=1		OC(=O)C1C=CC(=CC=1)NC(=O)N(CC1C=CC=CC=1)CC1C=CC=CC=1	86764-84-3	4-[(Dibenzylcarbamoyl)amino]benzoic acid	360.413	-90.3167	-75.5911	Organic compounds	Benzenoids	Benzene and substituted derivatives	N-phenylureas			1.84974	0.306619	2.59509	0.646845			1.24045	-0.160068	2.64083	0.636371
AESUYRPKXZFOSC-UHFFFAOYSA-N	O=C(NC1C=C(Cl)C=CC=1)C(Cl)CCl		O=C(NC1C=C(Cl)C=CC=1)C(Cl)CCl	91010-41-2	2,3-Dichloro-N-(3-chlorophenyl)propanimidic acid	252.528	-84.2756	-54.4042	Organic compounds	Benzenoids	Benzene and substituted derivatives	Anilides			1.18833	-0.289076	2.39405	0.635409			0.838034	-0.316738	2.083	0.634841
AESWHHJFQKKGMN-UHFFFAOYSA-N	O=S(=O)(NCCC1C=CC=CC=1)C1=CC=CC=C1Br		O=S(=O)(NCCC1C=CC=CC=1)C1=CC=CC=C1Br	849141-69-1	2-Bromo-N-(2-phenylethyl)benzene-1-sulfonamide	340.242	-119.733	-58.1715	Organic compounds	Benzenoids	Benzene and substituted derivatives	Benzenesulfonamides			1.26766	-0.604673	2.5078	0.67603			0.841242	-0.695709	2.1819	0.706105
AETAPIFVELRIDN-UHFFFAOYSA-N	ClC1=C2OC3=CC=CC=C3C2=C(Cl)C(Cl)=C1Cl		ClC1=C2OC3=CC=CC=C3C2=C(Cl)C(Cl)=C1Cl	24478-72-6	1,2,3,4-tetrachlorodibenzo[b,d]furan	305.975	-159.316	54.6113	Organic compounds	Organoheterocyclic compounds	Benzofurans	Dibenzofurans			0.926379	-1.72748	2.43481	0.77324			-4.29714	-5.48184	1.80503	0.518207
AETGYOWKOXPRCB-UHFFFAOYSA-N	CCCCCCCNN		CCCCCCCNN	2656-72-6	Hydrazine, heptyl-	130.235	87.9196	-110.367	Organic compounds	Organic nitrogen compounds	Organonitrogen compounds	Hydrazines and derivatives			1.58596	0.180472	2.54867	0.5			1.40695	-0.594266	2.49185	0.5
AETHRPHBGJAIBT-UHFFFAOYSA-N	CC(C)(C)COC1=CC=C(C=C1C#N)N1C=C(C=N1)C(O)=O		CC(C)(C)COC1=CC=C(C=C1C#N)N1C=C(C=N1)C(O)=O	206884-98-2	Niraxostat	299.33	-44.9109	27.689	Organic compounds	Organoheterocyclic compounds	Azoles	Pyrazoles			1.81167	0.124201	2.55028	0.756015			1.12881	-0.306122	2.52004	0.756291
AETHUDGJSSKZKT-UHFFFAOYSA-N	CC1=CC=C(C(C)=N1)[N+]([O-])=O		CC1=CC=C(C(C)=N1)[N+]([O-])=O	15513-52-7	2,6-Dimethyl-3-nitropyridine	152.153	-132.523	19.6899	Organic compounds	Organic 1,3-dipolar compounds	Allyl-type 1,3-dipolar organic compounds	Organic nitro compounds			1.56338	0.0147322	2.32806	0.605005			0.506426	-0.599988	1.96609	0.584621
AETKQQBRKSELEL-UHFFFAOYSA-N	OC1=CC=CC=C1C(=O)C=CC1C=CC=CC=1		OC1=CC=CC=C1C(=O)C=CC1C=CC=CC=1	1214-47-7	2-Propen-1-one, 1-(2-hydroxyphenyl)-3-phenyl-	224.259	-7.29345	-16.8213	Organic compounds	Phenylpropanoids and polyketides	Linear 1,3-diarylpropanoids	Chalcones and dihydrochalcones			1.78009	0.738557	2.43361	0.537756			1.44089	0.160687	2.53071	0.545671
AETKQQBRKSELEL-ZHACJKMWSA-N	OC1=CC=CC=C1C(=O)C=CC1C=CC=CC=1		OC1=CC=CC=C1C(=O)C=CC1C=CC=CC=1	888-12-0	trans-2â€²-Hydroxychalcone	224.259	-7.29464	-16.8213	Organic compounds	Phenylpropanoids and polyketides	Linear 1,3-diarylpropanoids	Chalcones and dihydrochalcones			1.78009	0.738557	2.43361	0.537756			1.44089	0.160687	2.53071	0.545671
AETOCTWURFLYKR-UHFFFAOYSA-N	O=C1CCCCC1C1=CC=CC2=CC=CC=C21		O=C1CCCCC1C1=CC=CC2=CC=CC=C21	22591-15-7	2-(1-naphthyl)cyclohexanone	224.303	29.0054	81.6423	Organic compounds	Benzenoids	Naphthalenes				1.47789	0.239181	2.29812	0.709639			0.894846	-0.245669	2.16001	0.716099
AETQSOZEKYWGIJ-UHFFFAOYSA-N	CC12CCC(CC1=CCC1C2C(=O)C2C1CCC1(OC3CC(C)CN(C3C1C)C(C)=O)C=2C)OC(C)=O		CC12CCC(CC1=CCC1C2C(=O)C2C1CCC1(OC3CC(C)CN(C3C1C)C(C)=O)C=2C)OC(C)=O	7622-06-2	28-Acetyl-11-oxo-17,23-epoxyveratraman-3-yl acetate	509.687	109.538	122.868	Organic compounds	Lipids and lipid-like molecules	Steroids and steroid derivatives	Steroidal alkaloids			1.56392	-3.16423	2.70138	0.782895			0.645976	-1.09466	2.41778	0.797153
AETSDHMVQHOYPB-UHFFFAOYSA-M	[Na+].COC1C=CC(=CC=1)C([O-])=O	[Na+]	COC1C=CC(=CC=1)C(O)=O	536-45-8	Sodium anisate	152.149	-17.5532	-4.1222	Organic compounds	Benzenoids	Benzene and substituted derivatives	Benzoic acids and derivatives		1.69088	1.79801	0.90645	2.52303	0.411491			1.78212	0.500369	2.73245	0.464326
AETYVJKNUMRBSP-UHFFFAOYSA-N	NC1C=CC(=CC=1)S(=O)(=O)NC1C=C(N)C=CC=1		NC1C=CC(=CC=1)S(=O)(=O)NC1C=C(N)C=CC=1	6267-28-3	Benzenesulfonamide, 4-amino-N-(3-aminophenyl)-	263.322	-108.722	-52.9476	Organic compounds	Benzenoids	Benzene and substituted derivatives	Benzenesulfonamides			1.85609	0.681182	2.48233	0.548272			1.03065	-0.411186	2.41569	0.612761
AEUAEICGCMSYCQ-UHFFFAOYSA-N	CC(CCCN(CC)CC)NC1=CC=NC2=CC(Cl)=CC=C21.OP(O)(O)=O	OP(=O)(O)O	CC(CCCN(CC)CC)NC1=CC=NC2=CC(Cl)=CC=C21	1446-17-9	Phosphoric acid--N~4~-(7-chloroquinolin-4-yl)-N~1~,N~1~-diethylpentane-1,4-diamine (1/1)	319.88	-100.595	94.0752	Organic compounds	Organoheterocyclic compounds	Quinolines and derivatives	Aminoquinolines and derivatives			0.984863	-0.230996	2.3389	0.749972			0.765086	-0.502248	1.91106	0.749972
AEUAWKRFSWQUSM-WYUVZMMLSA-M	[Na+].CC(=O)OCC1CSC2C(N=C([O-])CN3C=NN=N3)C(=O)N2C=1C(O)=O	[Na+]	CC(=O)OCC1CSC2C(N=C(O)CN3C=NN=N3)C(=O)N2C=1C(O)=O	27164-45-0	Sodium N-{3-[(acetyloxy)methyl]-2-carboxy-8-oxo-5-thia-1-azabicyclo[4.2.0]oct-2-en-7-yl}-2-(1H-tetrazol-1-yl)ethanimidate	382.358	52.6351	113.294	Organic compounds	Organic acids and derivatives	Peptidomimetics	Peptoid-peptide hybrids			1.79353	-0.409261	2.62906	0.780055			1.5029	-0.773311	3.09949	0.754298
AEUDPNLYBQEXMH-VYKNHSEDSA-N	O.CN1CCC23C4OC5C2=C(CC1C3CCC4O)C=CC=5O	O	CN1CCC23C4OC5C2=C(CC1C3CCC4O)C=CC=5O	65943-40-0	Dihydromorphine monohydrate	287.359	-14.0748	158.313	Organic compounds	Alkaloids and derivatives	Morphinans				1.22524	-3.459	2.37608	0.785589			0.453768	-3.72305	2.35435	0.794186
AEULIVPVIDOLIN-UHFFFAOYSA-N	CN1C=C2C3=C4C(=O)NCC4=C4C(=C3CCC2=N1)N(CC(C)C)C1=CC=C(C=C14)NC1N=CC=CN=1		CN1C=C2C3=C4C(=O)NCC4=C4C(=C3CCC2=N1)N(CC(C)C)C1=CC=C(C=C14)NC1N=CC=CN=1	856691-93-5	CEP-11981	477.572	-42.778	146.242	Organic compounds	Organoheterocyclic compounds	Indoles and derivatives	Carbazoles			1.89404	-0.0101326	2.62834	0.795781			1.23861	-0.687364	2.55337	0.810653
AEULVFLPCJOBCE-UHFFFAOYSA-N	COC1C=CC(CCCN2N=CC3=C2N=C(N)N2N=C(N=C23)C2=CC=CO2)=CC=1		COC1C=CC(CCCN2N=CC3=C2N=C(N)N2N=C(N=C23)C2=CC=CO2)=CC=1	316173-57-6	2-(2-Furanyl)-7-[3-(4-methoxyphenyl)propyl]-7H-pyrazolo[4,3-e][1,2,4]triazolo[1,5-c]pyrimidin-5-amine	389.419	-73.7691	30.4411	Organic compounds	Organoheterocyclic compounds	Triazolopyrimidines				1.68079	-0.165701	2.55099	0.763041			1.38876	-0.191789	2.6533	0.786349
AEUORZZHALJMBM-UHFFFAOYSA-N	O=C(CCCCC(=O)OCC1C=CC=CC=1)OCC1C=CC=CC=1		O=C(CCCCC(=O)OCC1C=CC=CC=1)OCC1C=CC=CC=1	2451-84-5	Dibenzyl adipate	326.392	8.08371	-46.0728	Organic compounds	Benzenoids	Benzene and substituted derivatives	Benzyloxycarbonyls			2.04185	0.742195	2.62342	0.374638			1.79672	0.421495	2.69605	0.471944
AEUROSNDVOZMHV-UHFFFAOYSA-M	[Na+].COP(=O)(OC)SCC([O-])=O	[Na+]	COP(=O)(OC)SCC(O)=O	NOCAS_912304	Sodium [(dimethoxyphosphoryl)sulfanyl]acetate	200.152	43.6826	-130.262	Organic compounds	Organic acids and derivatives	Carboxylic acids and derivatives	Carboxylic acid derivatives			-0.162581	-1.47355	2.08823	0.638733			-0.726794	-2.36772	1.37081	0.641511
AEUSNXZAJFBBMS-UHFFFAOYSA-N	CCCCCCCCCCCCCCC(C1C=CC=CC=1)C1C=CC=CC=1		CCCCCCCCCCCCCCC(C1C=CC=CC=1)C1C=CC=CC=1	97392-70-6	Diphenylpentadecane	364.617	-17.3897	-98.6719	Organic compounds	Benzenoids	Benzene and substituted derivatives	Diphenylmethanes			1.4998	-0.0341663	2.46405	0.545055			1.11508	0.0618531	2.34965	0.589499
AEUTYOVWOVBAKS-AOOOYVTPSA-N	CCC(CO)NCCNC(CO)CC		CCC(CO)NCCNC(CO)CC	10054-06-5	Ethambutol, meso-	204.314	121.648	-102.991	Organic compounds	Organic nitrogen compounds	Organonitrogen compounds	Amines			2.0116	0.764018	2.64601	0.645721			1.60262	0.0947411	2.70953	0.693728
AEUTYOVWOVBAKS-NXEZZACHSA-N	CCC(CO)NCCNC(CO)CC		CCC(CO)NCCNC(CO)CC	10054-05-4	(-)-Ethambutol	204.314	121.65	-102.982	Organic compounds	Organic nitrogen compounds	Organonitrogen compounds	Amines			2.0116	0.764018	2.64601	0.645721			1.60262	0.0947411	2.70953	0.693728
AEUTYOVWOVBAKS-UWVGGRQHSA-N	CCC(CO)NCCNC(CO)CC		CCC(CO)NCCNC(CO)CC	74-55-5	Ethambutol	204.314	121.649	-102.982	Organic compounds	Organic nitrogen compounds	Organonitrogen compounds	Amines			2.0116	0.764018	2.64601	0.645721			1.60262	0.0947411	2.70953	0.693728
AEUULUMEYIPECD-UHFFFAOYSA-N	O=C1CCC(O1)C1C=CC=CC=1		O=C1CCC(O1)C1C=CC=CC=1	1008-76-0	5-Phenyloxolan-2-one	162.188	30.7613	87.9287	Organic compounds	Organoheterocyclic compounds	Lactones	Gamma butyrolactones			1.69262	0.471607	2.31223	0.678382			1.34395	0.0270393	2.2098	0.676732
AEUVNCDLNIBLGM-UHFFFAOYSA-M	[Na+].CC1C=C(C(=CC=1Cl)N=NC1=C(O)C(=CC2=CC=CC=C21)C(=O)NC1=CC=CC=C1OC)S([O-])(=O)=O	[Na+]	CC1C=C(C(=CC=1Cl)N=NC1C2=CC=CC=C2C=C(C(=O)NC2C=CC=CC=2OC)C=1O)S(O)(=O)=O	73263-37-3	Benzenesulfonic acid, 4-chloro-2-[2-[2-hydroxy-3-[[(2-methoxyphenyl)amino]carbonyl]-1-naphthalenyl]diazenyl]-5-methyl-, sodium salt (1:1)	525.97	-163.517	7.23482	Organic compounds	Benzenoids	Naphthalenes	Naphthalenecarboxylic acids and derivatives			2.23915	0.576283	2.79959	0.362606			2.12344	0.479835	2.8041	0.391039
AEVBUGHMKXBGBL-UHFFFAOYSA-N	CCCCCCCCCCOC(=O)CCC(=O)OCCCCCCCCCC		CCCCCCCCCCOC(=O)CCC(=O)OCCCCCCCCCC	10595-82-1	Butanedioic acid, didecyl ester	398.628	135.699	-8.20089	Organic compounds	Lipids and lipid-like molecules	Fatty Acyls	Fatty alcohol esters			2.31315	1.47348	2.88578	0.130435			2.13637	1.18727	3.10266	0.174415
AEVGUKVBCBHBNF-MJMUOCKJSA-N	CC(C)CCCC(C)C1CCC2C3CC(C[75Se]C)C4CC(O)CCC=4C3CCC12C		CC(C)CCCC(C)C1CCC2C3CC(C[Se]C)C4CC(O)CCC=4C3CCC12C	63795-61-9	6-{[Methyl(~75~Se)selanyl]methyl}-19-norcholest-5(10)-en-3-ol	479.651	103.711	128.929	Organic compounds	Lipids and lipid-like molecules	Steroids and steroid derivatives	Cholestane steroids			1.92706	-0.671395	2.85887	0.794414			0.883679	-3.87663	2.58822	0.731424
AEVIHJUGCAKAMU-UHFFFAOYSA-N	NC(=O)C1COC2=CC=C(Cl)C=C2C=1		NC(=O)C1COC2=CC=C(Cl)C=C2C=1	83823-19-2	2H-1-Benzopyran-3-carboxamide, 6-chloro-	209.632	0.272401	52.1915	Organic compounds	Organoheterocyclic compounds	Benzopyrans	1-benzopyrans			1.09864	-0.441813	2.63235	0.723553			0.799368	-0.462179	2.04365	0.720615
AEVJDLLHPPMGSW-UHFFFAOYSA-N	OC1C=CC(=CC=1)C1(C2CCCC1CCC2)C1C=CC(O)=CC=1		OC1C=CC(=CC=1)C1(C2CCCC1CCC2)C1C=CC(O)=CC=1	533930-99-3	["4,4'-(Bicyclo[3.3.1]nonane-9,9-diyl)diphenol"]	308.421	42.9486	58.931	Organic compounds	Benzenoids	Benzene and substituted derivatives	Diphenylmethanes			0.814433	-3.37652	2.20055	0.689582			0.643731	-3.90683	2.27674	0.693085
AEVJVTKPYCQIIQ-FMDGEEDCSA-N	CCSC1OC(C(O)CO)C(O)C1O		CCSC1OC(C(O)CO)C(O)C1O	4137-33-1	Ethyl 1-thiohexofuranoside	224.278	154.897	16.496	Organic compounds	Organic oxygen compounds	Organooxygen compounds	Carbohydrates and carbohydrate conjugates			1.15783	-0.570832	2.3652	0.754882			1.29446	-0.811788	2.88485	0.729229
AEVKYFNHIADTEI-UHFFFAOYSA-N	O.O.OC1=CC(O)=CC=C1c1oc2cc(O)cc(O)c2c(=O)c1O	O	OC1=CC(O)=CC=C1c1oc2cc(O)cc(O)c2c(=O)c1O	654055-01-3	Morin hydrate	302.238	-73.7437	126.177	Organic compounds	Phenylpropanoids and polyketides	Flavonoids	Flavones			1.96334	0.58323	2.66928	0.687631			1.66872	-0.119912	2.9644	0.763383
AEVLWICMAHGAMS-UHFFFAOYSA-N	CC(C)C1CC=C(CC1)C=O		CC(C)C1CC=C(CC1)C=O	21391-98-0	4-(Propan-2-yl)cyclohex-1-ene-1-carbaldehyde	152.237	88.8836	80.6385	Organic compounds	Lipids and lipid-like molecules	Prenol lipids	Monoterpenoids			1.74498	0.630011	2.40268	0.717141			1.10196	-0.204531	2.04503	0.726141
AEVMBQIIZGKQRB-UHFFFAOYSA-N	CC(=O)CCCC#N		CC(=O)CCCC#N	10412-98-3	Hexanenitrile, 5-oxo-	111.144	81.7132	-52.1883	Organic compounds	Organic oxygen compounds	Organooxygen compounds	Carbonyl compounds			1.52471	0.209758	2.34837	0.578905			0.786372	-0.431971	2.23186	0.649082
AEVPFOZAPNAKHW-UHFFFAOYSA-N	COC1C=CC(CNC(=S)NCC2C=CC(=CC=2)OC)=CC=1		COC1C=CC(CNC(=S)NCC2C=CC(=CC=2)OC)=CC=1	22313-70-8	["Thiourea, N,N'-bis[(4-methoxyphenyl)methyl]-"]	316.426	-13.9098	0.21491	Organic compounds	Benzenoids	Phenol ethers	Anisoles			0.997251	-0.363296	2.47091	0.567368			0.884418	-0.465005	2.2113	0.581288
AEVPMLJXQLYMMI-UHFFFAOYSA-N	OP(O)(=O)CN(CP(O)(O)=O)CCN(CP(O)(O)=O)CCN(CP(O)(O)=O)CCN(CP(O)(O)=O)CP(O)(O)=O		OP(O)(=O)CN(CP(O)(O)=O)CCN(CP(O)(O)=O)CCN(CP(O)(O)=O)CCN(CP(O)(O)=O)CP(O)(O)=O	36475-52-2	(Ethane-1,2-diylbis(((phosphonomethyl)imino)ethane-2,1-diylnitrilobis(methylene)))tetrakisphosphonic acid	710.274	68.9773	-142.022	Organic compounds	Organic acids and derivatives	Organic phosphonic acids and derivatives	Organic phosphonic acids			2.05412	-0.195683	2.88867	0.586228			1.32429	-0.875974	3.2388	0.527404
AEVRMGYWAIGJIX-UHFFFAOYSA-N	Cl.Cl.NC(N)=NCCNCCNC(N)=N	Cl	NC(N)=NCCNCCNC(N)=N	68027-20-3	["N,N'-[Azanediyldi(ethane-2,1-diyl)]diguanidine--hydrogen chloride (1/2)"]	187.251	48.3383	-80.4746	Organic compounds	Organic nitrogen compounds	Organonitrogen compounds	Guanidines			1.80127	0.0680205	2.60816	0.751211			1.19641	-0.197231	2.65222	0.722343
AEVSLBGUEKOQEE-UHFFFAOYSA-N	ON=C(C1CC1)C1CC1		ON=C(C1CC1)C1CC1	1453-52-7	Cyclopropyl ketone, oxime	125.171	92.9726	34.9485	Organic compounds	Organic nitrogen compounds	Organonitrogen compounds	Oximes			1.68333	0.165715	2.411	0.766994			0.815906	-0.620411	2.03925	0.763455
AEVSQVUUXPSWPL-UHFFFAOYSA-N	C1C2CCC3CC2CCC31		C1C2CCC3CC2CCC31	253-14-5	twistane	136.238	112.719	55.2866	Organic compounds	Hydrocarbons	Polycyclic hydrocarbons				1.85462	-0.0459063	2.44694	0.777693			0.531851	-5.0191	2.04201	0.8075
AEVUURWLDCELOV-AYVPJYCDSA-N	CC12CCC3C4=CC=C(C=C4CC=C3C1CCC2(O)C1C=COC=1)OC(C)=O		CC12CCC3C4=CC=C(C=C4CC=C3C1CCC2(O)C1C=COC=1)OC(C)=O	10322-73-3	Estrofurate	378.468	128.025	134.596	Organic compounds	Lipids and lipid-like molecules	Steroids and steroid derivatives	17-furanylsteroids and derivatives			1.43584	-3.34223	2.5881	0.781307			0.676012	-3.13135	2.25453	0.76421
AEWHYWSPVRZHCT-NDZSKPAWSA-N	CC(C)C(=O)SCCNC(=O)CCNC(=O)C(O)C(C)(C)COP(O)(=O)OP(O)(=O)OCC1OC(C(O)C1OP(O)(O)=O)N1C=NC2=C(N)N=CN=C12		CC(C)C(=O)SCCNC(=O)CCNC(=O)C(O)C(C)(C)COP(O)(=O)OP(O)(=O)OCC1OC(C(O)C1OP(O)(O)=O)N1C=NC2=C(N)N=CN=C12	15621-60-0	Isobutyryl CoA	837.632	35.4033	121.689	Organic compounds	Lipids and lipid-like molecules	Fatty Acyls	Fatty acyl thioesters			1.83287	-1.13892	2.66651	0.82026			1.0247	-2.91806	2.80965	0.825455
AEWLBYKVDXKPPN-UHFFFAOYSA-N	OC1(O)CCCO1		OC1(O)CCCO1	50976-18-6	Oxolane-2,2-diol	104.105	96.6204	59.7023	Organic compounds	Organoheterocyclic compounds	Tetrahydrofurans				1.82107	0.407563	2.47723	0.764302			1.46216	-0.468598	2.73741	0.796472
AEWNSBCPMQKSLN-UHFFFAOYSA-N	CC(=O)OC1=CC=C2C(=C1)C(C(=O)OCC)=C(C)N2C		CC(=O)OC1=CC=C2C(=C1)C(C(=O)OCC)=C(C)N2C	40945-79-7	1H-Indole-3-carboxylic acid, 5-(acetyloxy)-1,2-dimethyl-, ethyl ester	275.304	-29.6247	12.4498	Organic compounds	Organoheterocyclic compounds	Indoles and derivatives	Indolecarboxylic acids and derivatives			1.79256	0.311765	2.50727	0.691318			1.21009	-0.30703	2.63406	0.692494
AEXAJWVYBKZHIQ-UHFFFAOYSA-N	NC(=O)C1(CCCC1)NC1C=CC=CC=1		NC(=O)C1(CCCC1)NC1C=CC=CC=1	6636-93-7	1-(phenylamino)cyclopentanecarboxamide	204.273	25.3337	63.2963	Organic compounds	Organic acids and derivatives	Carboxylic acids and derivatives	Amino acids, peptides, and analogues			1.44575	0.246465	2.26772	0.683519			0.853523	-0.78131	2.12616	0.681166
AEXAMFIUJCWGHF-UHFFFAOYSA-N	CCOC(=O)COCC(F)(F)C(F)(F)C(F)(F)C(F)F		CCOC(=O)COCC(F)(F)C(F)(F)C(F)(F)C(F)F	138224-54-1	Ethyl [(2,2,3,3,4,4,5,5-octafluoropentyl)oxy]acetate	318.16	10.589	-146.851	Organic compounds	Organic acids and derivatives	Carboxylic acids and derivatives	Carboxylic acid derivatives			1.46043	-0.571071	2.55113	0.689219			0.787622	-1.68375	2.27059	0.687303
AEXCUJUYEZIWJV-UHFFFAOYSA-N	CSc1[nH]c(O)cc(=O)[n]1		CSc1[nH]c(O)cc(=O)[n]1	1979-98-2	2-Methylthiopyrimidine-4,6-diol	158.182	-22.1413	30.8164	Organic compounds	Organosulfur compounds	Thioethers	Aryl thioethers			0.907946	-0.615559	2.52432	0.795353			0.814558	-0.68708	2.1598	0.787257
AEXITZJSLGALNH-UHFFFAOYSA-N	CC(N)=NO		CC(N)=NO	22059-22-9	Acetamide, oxime	74.083	73.5293	-64.9387	Organic compounds	Organic nitrogen compounds	Organonitrogen compounds	Amidines			1.46458	0.127124	2.25627	0.654799			0.893888	-0.734334	2.25468	0.646606
AEXMKKGTQYQZCS-UHFFFAOYSA-N	CC(C)(CC)CC		CC(C)(CC)CC	562-49-2	3,3-Dimethylpentane	100.205	75.8882	-120.08	Organic compounds	Hydrocarbons	Saturated hydrocarbons	Alkanes			1.87257	0.546909	2.46707	0.640728			1.17367	0.0617723	2.1485	0.643747
AEXTUKMNBHBFAH-UHFFFAOYSA-M	[Na+].[O-]S(=O)(=O)N1N=NC2C=C3C(=CC1=2)C(=O)C1=CC=CC=C1C3=O	[Na+]	OS(=O)(=O)N1N=NC2C=C3C(=CC1=2)C(=O)C1C=CC=CC=1C3=O	93918-96-8	Sodium 5,10-dioxo-5,10-dihydro-1H-anthra[2,3-d][1,2,3]triazole-1-sulfonate	329.293	-133.804	53.479	Organic compounds	Benzenoids	Anthracenes	Anthraquinones			2.0531	0.323084	2.59924	0.708129			1.11688	-0.797164	2.54433	0.699277
AEXUAOSTRZAKRT-UHFFFAOYSA-N	CC(C)CCOC(=O)C1C=NC=CC=1		CC(C)CCOC(=O)C1C=NC=CC=1	50917-69-6	Isopentyl nicotinate	193.246	-25.5179	-16.9225	Organic compounds	Organoheterocyclic compounds	Pyridines and derivatives	Pyridinecarboxylic acids and derivatives			1.71951	0.175511	2.38597	0.563291			1.16372	-0.184746	2.28415	0.582175
AEXWTPJOQWLAFH-UHFFFAOYSA-N	CC1=C(N=NN1C1C=CC(F)=CC=1)C(O)=O		CC1=C(N=NN1C1C=CC(F)=CC=1)C(O)=O	887035-89-4	1-(4-fluorophenyl)-5-methyl-1H-1,2,3-triazole-4-carboxylic acid	221.191	-43.5749	33.7822	Organic compounds	Organoheterocyclic compounds	Azoles	Triazoles			1.68528	-0.104383	2.52122	0.743663			1.04	-0.509452	2.38356	0.749389
AEYJNXNLQZMALK-AENOIHSZSA-M	[Cu+2].CC(C)CCCC(C)CCCC(C)CCCC(C)=CCOC(=O)CCC1C(C)C2C=c3[n-]c(=CC4NC(C=c5[n-]c6c(C(=O)C(C(=O)OC)C=6C=1N=2)c5C)=C(CC)C=4C)c(C=C)c3C	[Cu+2]	CC(C)CCCC(C)CCCC(C)CCCC(C)=CCOC(=O)CCC1C(C)C2C=c3[n-]c(=CC4NC(C=c5[n-]c6c(C(=O)C(C(=O)OC)C=6C=1N=2)c5C)=C(CC)C=4C)c(C=C)c3C	15739-09-0	Copper, [3,7,11,15-tetramethyl-2-hexadecenyl 9-ethenyl-14-ethyl-21-(methoxycarbonyl)-4,8,13,18-tetramethyl-20-oxo-3-phorbinepropanoato(2-)-N23,N24,N25,N26]-, [SP-4-2-[3S-[3?(2E,7S*,11S*),4?,21?]]]-	869.204	38.731	-25.311	Organic compounds	Organoheterocyclic compounds	Tetrapyrroles and derivatives	Chlorins			2.14484	-0.411291	2.95791	0.813024			1.77951	-0.784153	2.98234	0.829742
AEYNFHFXCAPUQI-UHFFFAOYSA-N	CC1C=CC(=CC=1)S(=O)(=O)NC1=CC=CC2=C1C(=O)C1=CC=CC(Cl)=C1C2=O		CC1C=CC(=CC=1)S(=O)(=O)NC1=CC=CC2=C1C(=O)C1=CC=CC(Cl)=C1C2=O	82-14-4	N-(5-Chloro-9,10-dihydro-9,10-dioxo-1-anthryl)-p-toluenesulphonamide	411.866	-111.165	-49.429	Organic compounds	Benzenoids	Anthracenes	Anthraquinones			1.933	-0.355029	2.65597	0.566827			1.16512	-0.181755	2.40096	0.66042
AEZJNQZYZFLLIY-UHFFFAOYSA-N	CC(=C)C(=O)OCCCCCCCCCCCCO		CC(=C)C(=O)OCCCCCCCCCCCCO	86282-42-0	12-Hydroxydodecyl methacrylate	270.413	95.9738	6.8518	Organic compounds	Lipids and lipid-like molecules	Fatty Acyls	Fatty alcohol esters			2.10383	1.14331	2.69746	0.246429			1.81311	0.847991	2.61829	0.303777
AEZPAUSGTAHLOQ-UHFFFAOYSA-N	OC1C=CC(=CC=1)C1=C2N=C(C=C(N2N=C1C1C=CC=CC=1)C(F)(F)F)C(F)(F)F		OC1C=CC(=CC=1)C1=C2N=C(C=C(N2N=C1C1C=CC=CC=1)C(F)(F)F)C(F)(F)F	805239-56-9	PHTPP	423.316	-49.4143	24.6134	Organic compounds	Organoheterocyclic compounds	Azoles	Pyrazoles			0.988207	-0.464319	2.45705	0.743082			0.872391	-2.53734	2.43919	0.761512
AEZTZOJIMOAEDE-UHFFFAOYSA-N	CC1=CC=C(C=C1NC(=O)N1CC1)NC(=O)N1CC1		CC1=CC=C(C=C1NC(=O)N1CC1)NC(=O)N1CC1	2131-75-1	2,4-Bis(3,3-ethyleneureido)toluene	260.297	3.07222	42.59	Organic compounds	Benzenoids	Benzene and substituted derivatives	N-phenylureas			1.71562	0.318957	2.46722	0.658195			0.917828	-0.369698	2.30547	0.70784
AEZZPAQOEUQNBB-UHFFFAOYSA-N	CC1CC(=O)NN=C1C1C=CC(=CC=1)N1C=NC=C1		CC1CC(=O)N=NC1C1C=CC(=CC=1)N1C=NC=C1	86798-59-6	IMAZODAN,5-METHYL	254.293	-55.4676	53.7354	Organic compounds	Organoheterocyclic compounds	Azoles	Imidazoles			1.57281	-0.0931416	2.36424	0.784073			0.911204	-0.31291	2.48148	0.79383
AFABFCARSKKBAV-UHFFFAOYSA-N	CC(=O)NC1C=C(C(=CC=1)OC)N(CC1C=CC=CC=1)CC1C=CC=CC=1		CC(=O)NC1C=C(C(=CC=1)OC)N(CC1C=CC=CC=1)CC1C=CC=CC=1	25080-14-2	Acetamide, N-[3-[bis(phenylmethyl)amino]-4-methoxyphenyl]-	360.457	-109.786	-67.5815	Organic compounds	Benzenoids	Benzene and substituted derivatives	Phenylmethylamines			1.53786	0.240503	2.46462	0.663249			1.00421	-0.11225	2.28599	0.675393
AFABGHUZZDYHJO-UHFFFAOYSA-N	CCCC(C)C		CCCC(C)C	107-83-5	2-Methylpentane	86.178	126.772	-94.3967	Organic compounds	Hydrocarbons	Saturated hydrocarbons	Alkanes			2.02666	1.24571	2.6727	0.540605	0.726997	0.726997	1.168	0.447238	2.3176	0.459249
AFAGKKJVZIQRMO-UHFFFAOYSA-N	Cl.CC(CC(=O)NC1C=CC=CC=1)N(CC)CC	Cl	CC(CC(=O)NC1C=CC=CC=1)N(CC)CC	93940-32-0	3-(Diethylamino)-N-phenylbutanimidic acid--hydrogen chloride (1/1)	234.343	-83.4527	-67.6851	Organic compounds	Organic acids and derivatives	Carboxylic acids and derivatives	Amino acids, peptides, and analogues			1.56241	0.310523	2.38673	0.607583			0.873128	-0.356967	2.22062	0.571151
AFAIELJLZYUNPW-UHFFFAOYSA-N	NC1C=CC(=CC=1)C(C1C=CC(N)=CC=1)=C1C=CC(=N)C=C1		NC1C=CC(=CC=1)C(C1C=CC(N)=CC=1)=C1C=CC(=N)C=C1	479-73-2	C.I. Basic Red 9	287.366	-142.866	-43.9989	Organic compounds	Benzenoids	Benzene and substituted derivatives	Diphenylmethanes			1.06749	-0.101602	2.25878	0.653982			0.714051	-0.470147	2.24704	0.670085
AFAJYBYVKUTWJK-UHFFFAOYSA-N	Cl.COC1C=C(NCCN)C(=CC=1)[N+]([O-])=O	Cl	COC1C=C(NCCN)C(=CC=1)[N+]([O-])=O	86419-69-4	HC Yellow no. 9	211.221	-130.024	14.492	Organic compounds	Benzenoids	Benzene and substituted derivatives	Nitrobenzenes			1.91276	0.481109	2.63348	0.628157			1.2012	-0.357151	2.36598	0.662401
AFAKGWSHLMCTLM-UHFFFAOYSA-N	CC(C)NO.CC(O)=O	CC(=O)O	CC(C)NO	132157-68-7	2-Propanamine, N-hydroxy-, acetate (1:1)	75.111	63.2617	-71.073	Organic compounds	Organic nitrogen compounds	Organonitrogen compounds	N-organohydroxylamines			1.60788	0.503957	2.64229	0.68956	1.38172		1.43351	0.2286	2.47634	0.523577
AFAXGSQYZLGZPG-UHFFFAOYSA-N	OS(=O)(=O)CCS(O)(=O)=O		OS(=O)(=O)CCS(O)(=O)=O	110-04-3	1,2-Ethanedisulfonic acid	190.198	42.6066	-90.8657	Organic compounds	Organic acids and derivatives	Organic sulfonic acids and derivatives	Organosulfonic acids and derivatives			1.87623	0.513836	2.63966	0.610901			1.48473	-0.325362	2.53277	0.650429
AFAZGSWKIZVRSR-UHFFFAOYSA-N	CC(C)(C)C1C=CC(=CC=1)C(=O)OC1C=C(C=CC=1)OC(=O)C1C=CC(=CC=1)C(C)(C)C		CC(C)(C)C1C=CC(=CC=1)C(=O)OC1C=C(C=CC=1)OC(=O)C1C=CC(=CC=1)C(C)(C)C	17831-67-3	1,3-Phenylene bis(4-(1,1-dimethylethyl)benzoate)	430.544	-27.9457	-29.6686	Organic compounds	Phenylpropanoids and polyketides	Depsides and depsidones				1.87975	0.0733846	2.57759	0.622499			1.21808	-0.0910538	2.48787	0.61179
AFBBKYQYNPNMAT-UHFFFAOYSA-N	S=c1[nH]c[n][nH]1		S=c1[nH]c[n][nH]1	3179-31-5	1,2,4-Triazole-3-thiol	101.134	-16.8856	26.4583	Organic compounds	Organoheterocyclic compounds	Azoles	Triazoles			0.411053	-0.780908	1.89245	0.773339			0.529401	-0.886882	1.81539	0.798195
AFBDSAJOMZYQAI-CNOZUTPLSA-N	CC(OC1OCCNC1C1=CC=C(F)C=C1)C1C=C(C=C(C=1)C(F)(F)F)C(F)(F)F		CC(OC1OCCNC1C1=CC=C(F)C=C1)C1C=C(C=C(C=1)C(F)(F)F)C(F)(F)F	171338-27-5	(2R,3S)-2-{(1R)-1-[3,5-Bis(trifluoromethyl)phenyl]ethoxy}-3-(4-fluorophenyl)morpholine	437.355	15.5771	85.334	Organic compounds	Organoheterocyclic compounds	Oxazinanes	Morpholines			1.10679	-0.322237	2.40397	0.790606			0.623897	-1.56096	2.4335	0.78047
AFBIPPFHGMHBSS-UHFFFAOYSA-L	[Na+].[Na+].COC1C=C(N)C(=CC=1N=NC1=CC=C(N=NC2C=C(C=CC=2)S([O-])(=O)=O)C2=CC=C(C=C12)S([O-])(=O)=O)OC	[Na+]	COC1C=C(N)C(=CC=1N=NC1=CC=C(N=NC2C=C(C=CC=2)S(O)(=O)=O)C2=CC=C(C=C12)S(O)(=O)=O)OC	68214-02-8	2-Naphthalenesulfonic acid, 8-[2-(4-amino-2,5-dimethoxyphenyl)diazenyl]-5-[2-(3-sulfophenyl)diazenyl]-, sodium salt (1:2)	571.593	-160.719	-20.5954	Organic compounds	Benzenoids	Naphthalenes	Naphthalene sulfonic acids and derivatives			2.07577	0.923277	2.78982	0.621667			2.1048	0.497472	2.95351	0.66411
AFBIVMWJUFLUNW-UHFFFAOYSA-N	N#CC1C=C(C=CC=1)NC(=O)CC1C=CC=CC=1		N#CC1C=C(C=CC=1)NC(=O)CC1C=CC=CC=1	89246-40-2	N-(3-cyanophenyl)-2-phenylacetamide	236.274	-80.1567	-67.6233	Organic compounds	Benzenoids	Benzene and substituted derivatives	Phenylacetamides			1.83345	0.63946	2.49995	0.603572			0.916589	-0.541363	2.29817	0.651205
AFBJTTXQSHVNCK-UHFFFAOYSA-N	COC1C=CC(=CC=1)C1N=NC=NN=1		COC1C=CC(=CC=1)C1N=NC=NN=1	56107-91-6	1,2,4,5-Tetrazine, 3-(4-methoxyphenyl)-	188.19	-64.3825	47.6026	Organic compounds	Benzenoids	Phenol ethers	Anisoles			1.49382	0.0585595	2.32703	0.609766			1.03682	-0.386302	2.24371	0.616218
AFBMLGHBGGLHOF-UHFFFAOYSA-N	CCCCCCCCC(=O)OCCC1C=CC=CC=1		CCCCCCCCC(=O)OCCC1C=CC=CC=1	57943-67-6	Phenethyl nonanoate	262.393	5.42355	-50.1564	Organic compounds	Lipids and lipid-like molecules	Fatty Acyls	Fatty acid esters			1.88546	0.5756	2.50802	0.362868			1.70802	0.393458	2.64283	0.430031
AFBMPICOPALERX-UHFFFAOYSA-N	CN(C)CCCN(CCC(O)=O)S(=O)(=O)C(F)(F)C(F)(F)C(F)(F)C(F)(F)C(F)(F)C(F)(F)C(F)(F)F		CN(C)CCCN(CCC(O)=O)S(=O)(=O)C(F)(F)C(F)(F)C(F)(F)C(F)(F)C(F)(F)C(F)(F)C(F)(F)F	1432486-91-3	N-[3-(Dimethylamino)propyl]-N-[(pentadecafluoroheptyl)sulfonyl]-beta-alanine	606.348	-14.2615	-160.927	Organic compounds	Organic acids and derivatives	Organic sulfonic acids and derivatives	Organosulfonic acids and derivatives			0.362079	-0.859062	2.31885	0.592273			0.50337	-1.24939	2.38752	0.617511
AFBPFSWMIHJQDM-UHFFFAOYSA-N	CNC1C=CC=CC=1		CNC1C=CC=CC=1	100-61-8	N-Methylaniline	107.156	-75.5754	-72.6604	Organic compounds	Organic nitrogen compounds	Organonitrogen compounds	Amines			1.16045	0.194048	2.00758	0.530481	0.0955166	0.0955166	0.790436	-0.563101	2.02554	0.426417
AFBQUXAODCBPRJ-UHFFFAOYSA-N	CCC1(CCCCN(C)C1=O)C1C=C(C=CC=1)OC		CCC1(CCCCN(C)C1=O)C1C=C(C=CC=1)OC	71556-72-4	3-Ethyl-3-(3-methoxyphenyl)-1-methylazepan-2-one	261.365	28.1725	60.3993	Organic compounds	Organoheterocyclic compounds	Lactams	Caprolactams			1.44736	-0.35031	2.35312	0.725699			0.955486	-0.335506	2.20656	0.706531
AFBSBOBDKXETKP-UHFFFAOYSA-N	Cl.CN1CCN(CC(=O)N2C3=NC=CC=C3NC(=O)C3=CC=CC=C23)CC1	Cl	CN1CCN(CC(=O)N2C3=NC=CC=C3NC(=O)C3=CC=CC=C23)CC1	93173-05-8	Pirenzepine monohydrochloride	351.41	-46.4482	81.713	Organic compounds	Organoheterocyclic compounds	Benzodiazepines	1,4-benzodiazepines			1.5324	0.181507	2.48882	0.75425			0.943262	-0.536485	2.50281	0.760261
AFBYHZACPPSJKD-UHFFFAOYSA-N	CN(C)CCCN1C2=CC=CC=C2C=CC2=CC=CC=C12		CN(C)CCCN1C2=CC=CC=C2C=CC2=CC=CC=C12	303-54-8	Depramine	278.399	-41.3738	92.3426	Organic compounds	Organoheterocyclic compounds	Benzazepines	Dibenzazepines			1.04293	-0.522891	2.18273	0.6523			0.698452	-0.475585	2.0911	0.728094
AFBZBYQKIMBONK-UHFFFAOYSA-N	CCC(=O)OC1C(F)CC2C3CC=C4CC(=O)CCC4(C)C3CCC12C		CCC(=O)OC1C(F)CC2C3CC=C4CC(=O)CCC4(C)C3CCC12C	10183-45-6	16-Fluoro-3-oxoandrost-4-en-17-yl propanoate	362.485	118.217	119.726	Organic compounds	Lipids and lipid-like molecules	Steroids and steroid derivatives	Steroid esters			1.55189	-3.00892	2.57775	0.668408			0.600427	-2.56176	2.20313	0.651737
AFCCDDWKHLHPDF-UHFFFAOYSA-M	[Na+].CNC([S-])=S	[Na+]	CNC(S)=S	137-42-8	Metam-sodium	107.203	64.1729	-82.8645	Organic compounds	Organic salts	Organic metal salts	Organic alkali metal salts	0.430818	0.430818	0.378737	-0.75533	1.92296	0.498203	-0.420371	-0.420371	-0.0320394	-0.929544	1.25688	0.51348
AFCDXKGLUDDXCK-NPSMOHFVSA-N	COc1c(cc2oc(C3C=C(O)C(O)=CC=3)c(O)c(=O)c2c1O)OC1OC(CO)C(O)C(O)C1O		COc1c(cc2oc(C3C=C(O)C(O)=CC=3)c(O)c(=O)c2c1O)OC1OC(CO)C(O)C(O)C1O	19833-25-1	2-(3,4-Dihydroxyphenyl)-7-(beta-D-glucopyranosyloxy)-3,5-dihydroxy-6-methoxy-4H-1-benzopyran-4-one	494.405	31.4364	161.849	Organic compounds	Phenylpropanoids and polyketides	Flavonoids	Flavonoid glycosides			2.215	0.503583	3.01079	0.669601			2.00201	-1.07149	3.20713	0.692871
AFCGFAGUEYAMAO-UHFFFAOYSA-N	CC(=O)NCCCS(O)(=O)=O		CC(=O)NCCCS(O)(=O)=O	77337-76-9	Acamprosate	181.213	60.6372	-47.4964	Organic compounds	Organic acids and derivatives	Organic sulfonic acids and derivatives	Organosulfonic acids and derivatives			1.9655	0.742786	2.61868	0.674839			1.44129	-0.115674	2.55145	0.693541
AFCLAQNPPWCNDL-UHFFFAOYSA-K	[Cl-].[Cl-].[Cl-].[Zn+2].N#[N+]C1=CC(Cl)=CC=C1Cl	[Cl-].[Zn+2]	N#[N+]C1=CC(Cl)=CC=C1Cl	68025-26-3	2,5-Dichlorobenzene-1-diazonium zinc chloride (1/1/3)	174.01	-96.8401	-7.69863	Organic compounds	Benzenoids	Benzene and substituted derivatives	Halobenzenes			0.949463	-0.791927	2.03455	0.636821			0.642825	-0.654967	1.94707	0.617718
AFCUGQOTNCVYSW-UHFFFAOYSA-H	O.[La+3].[La+3].[O-]C([O-])=O.[O-]C([O-])=O.[O-]C([O-])=O	O.[La+3]	OC(O)=O	54451-24-0	Lanthanum carbonate--water (2/3/1)	62.024	78.924	-79.4128	Organic compounds	Organic acids and derivatives	Organic carbonic acids and derivatives	Organic carbonic acids			1.3437	0.187083	2.23558	0.46			1.17365	-0.0577388	2.36813	0.425714
AFCUSINUINYQAT-UHFFFAOYSA-N	CC1C=CC(=CC=1)S(=O)(=O)N1CCN(CC1)C1C=CC(=CC=1)OC		CC1C=CC(=CC=1)S(=O)(=O)N1CCN(CC1)C1C=CC(=CC=1)OC	83863-43-8	1-(4-Methoxyphenyl)-4-(4-methylbenzene-1-sulfonyl)piperazine	346.452	-12.9112	51.7526	Organic compounds	Benzenoids	Benzene and substituted derivatives	Toluenes			1.46829	-0.0644721	2.43975	0.650586			0.935792	-0.291588	2.27329	0.666817
AFCXVDRTNQNGHS-UHFFFAOYSA-N	CCCCCCC(=O)OCCC(C)C		CCCCCCC(=O)OCCC(C)C	109-25-1	3-Methylbutyl heptanoate	200.322	128.915	-19.1358	Organic compounds	Lipids and lipid-like molecules	Fatty Acyls	Fatty acid esters			2.18829	1.36496	2.72418	0.196631			1.85763	1.04496	2.74173	0.315239
AFCZSFUPWLSMSZ-AOOOYVTPSA-N	C1CCCCCCCC2OC21		C1CCCCCCCC2OC21	29587-92-6	cis-1,2-Epoxycyclododecane	154.253	103.452	49.5083	Organic compounds	Organoheterocyclic compounds	Epoxides				1.99473	0.738693	2.55097	0.643791			1.20665	-0.304238	2.36065	0.654902
AFDANKUHSLVEBJ-BENTYHEHSA-N	OC1C2C(OC(C1=O)C1C=CC(O)=CC=1)=C(C1C(OC3=CC(O)=CC(O)=C3C1=O)C1C=CC(O)=CC=1)C(O)=CC=2O		OC1C2C(OC(C1=O)C1C=CC(O)=CC=1)=C(C1C(OC3=CC(O)=CC(O)=C3C1=O)C1C=CC(O)=CC=1)C(O)=CC=2O	14736-58-4	Garcinia biflavonoid 1	558.495	5.29975	139.61	Organic compounds	Phenylpropanoids and polyketides	Flavonoids	Biflavonoids and polyflavonoids			2.32743	0.233216	3.06605	0.774205			1.67051	-3.13154	2.77989	0.7858
AFDHDUMCMVFEIH-UHFFFAOYSA-N	CC1(O)C2=Nc3c(NCC2C(C(=O)OC2C(O)C(O)C(O)C(O)C2O)C21C1=CC=C(Br)C=C1NC2=O)[nH]c(=O)[nH]c3=O		CC1(O)C2=Nc3c(NCC2C(C(=O)OC2C(O)C(O)C(O)C(O)C2O)C21C1=CC=C(Br)C=C1NC2=O)[nH]c(=O)[nH]c3=O	99102-40-6	["2,3,4,5,6-Pentahydroxycyclohexyl 6'-bromo-2,2',4,6-tetrahydroxy-6-methyl-8,8a,9,10-tetrahydro-6H-spiro[cyclopenta[e]pyrimido[4,5-b][1,4]diazepine-7,3'-indole]-8-carboxylate"]	652.411	23.587	143.692	Organic compounds	Organoheterocyclic compounds	Pyrimidodiazepines				1.75075	-2.11002	2.69151	0.814305			0.916792	-3.03885	2.75462	0.812666
AFDHSXYOTGMEAP-UHFFFAOYSA-N	OC1C2C=C3C=CC=CC3=C3C=CC4=CC=CC(=C4C3=2)C=1O		OC1C2C=C3C=CC=CC3=C3C=CC4=CC=CC(=C4C3=2)C=1O	57304-00-4	Benzo(a)pyrene-4,5-diol	284.314	-110.381	47.545	Organic compounds	Benzenoids	Pyrenes	Benzopyrenes			1.9341	0.508969	2.52713	0.6625			1.23006	-1.88502	2.44845	0.583518
AFDJHXIOALGLQB-UHFFFAOYSA-N	O=C(NC1=CC=C(C=C1)S(=O)(=O)NC1=NC=CC=N1)C1=CC=CC=C1Br		O=C(NC1=CC=C(C=C1)S(=O)(=O)NC1=NC=CC=N1)C1=CC=CC=C1Br	6162-02-3	2-bromo-N-[4-(pyrimidin-2-ylsulfamoyl)phenyl]benzamide	433.287	-105.189	-55.0497	Organic compounds	Benzenoids	Benzene and substituted derivatives	Anilides			1.72102	-0.83624	2.61999	0.684107			0.951016	-1.13436	2.41298	0.704317
AFDJQFFKYDCYIG-JSGFVSQVSA-M	[Na+].[O-]C1=NC(O)=CN1N=CC1=CC=C(O1)[N+]([O-])=O	[Na+]	[O-][N+](=O)C1=CC=C(C=NN2C=C(O)N=C2O)O1	54-87-5	Nitrofurantoin sodium	238.159	-111.102	23.4138	Organic compounds	Organic acids and derivatives	Carboxylic acids and derivatives	Amino acids, peptides, and analogues			1.51577	0.180236	2.43478	0.685843			1.02522	-0.586059	2.61497	0.688427
AFDMODCXODAXLC-UHFFFAOYSA-N	N=CC1C=CC=CC=1		N=CC1C=CC=CC=1	16118-22-2	Phenylmethanimine	105.14	-5.79822	-23.3655	Organic compounds	Benzenoids	Benzene and substituted derivatives				1.30532	0.370483	2.035	0.587002			1.20482	-0.150366	2.09977	0.587153
AFDNCGALNDJAQN-UHFFFAOYSA-N	Cl.CCCCN(CC1OC(=O)C2=CC(O)=C(O)C(O)=C21)CCCC	Cl	CCCCN(CC1OC(=O)C2=CC(O)=C(O)C(O)=C21)CCCC	5968-79-6	3-[(Dibutylamino)methyl]-4,5,6-trihydroxy-2-benzofuran-1(3H)-one--hydrogen chloride (1/1)	323.389	32.3561	-17.5083	Organic compounds	Benzenoids	Benzene and substituted derivatives	Benzoic acids and derivatives			1.83971	0.446159	2.57506	0.731038			1.26068	-0.804345	2.54914	0.739592
AFDOVMFLHLZNFH-UHFFFAOYSA-N	ClC1C=CC(=CC=1)C1CC(C2=CC=CO2)N(N=1)C1C=CC=CC=1		ClC1C=CC(=CC=1)C1CC(C2=CC=CO2)N(N=1)C1C=CC=CC=1	4035-38-5	3-(4-chlorophenyl)-5-(2-furyl)-1-phenyl-4,5-dihydro-1H-pyrazole	322.795	-32.4161	49.0703	Organic compounds	Organoheterocyclic compounds	Azoles	Pyrazoles			1.12531	-0.494646	2.5613	0.754479			0.775595	-0.70498	2.15	0.762591
AFDQGRURHDVABZ-UHFFFAOYSA-N	CN(C)C=O.O=S(=O)=O	O=S(=O)=O	CN(C)C=O	29584-42-7	Formamide, N,N-dimethyl-, compd. with sulfur trioxide (1:1)	73.095	95.6491	-84.1839	Organic compounds	Organic acids and derivatives	Carboxylic acids and derivatives	Carboxylic acid derivatives	1.83076		1.69127	0.654226	2.28069	0.543463	1.56311		1.23708	-0.889031	2.24723	0.553312
AFDRCEOKCOUICI-HQMMCQRPSA-N	O[14C](=O)C(F)(F)C(F)OC(F)(F)C(F)(F)C(F)(F)OC(F)(F)F		OC(=O)C(F)(F)C(F)OC(F)(F)C(F)(F)C(F)(F)OC(F)(F)F	2087970-37-2	2,2,3-Trifluoro-3-[1,1,2,2,3,3-hexafluoro-3-(trifluoromethoxy)propoxy](1-14C)propanoic acid	378.065	0.153919	-143.104	Organic compounds	Organic acids and derivatives	Carboxylic acids and derivatives	Alpha-halocarboxylic acids and derivatives			0.425224	-1.03886	2.3117	0.710542	0.504957		0.331346	-1.40442	1.94091	0.558854
AFDRCEOKCOUICI-UHFFFAOYSA-M	[O-]C(=O)C(F)(F)C(F)OC(F)(F)C(F)(F)C(F)(F)OC(F)(F)F		OC(=O)C(F)(F)C(F)OC(F)(F)C(F)(F)C(F)(F)OC(F)(F)F	2127366-90-7	2,2,3-Trifluoro-3-[1,1,2,2,3,3-hexafluoro-3-(trifluoromethoxy)propoxy]propanoate	378.065	0.13839	-142.943	Organic compounds	Organic acids and derivatives	Carboxylic acids and derivatives	Alpha-halocarboxylic acids and derivatives			0.425224	-1.03886	2.3117	0.710542	0.504957		0.331346	-1.40442	1.94091	0.558854
AFDSETGKYZMEEA-HZJYTTRNNA-N	CCCCCC=CCC=CCCCCCCC(O)C(O)=O		CCCCCC=CCC=CCCCCCCC(O)C(O)=O	57818-44-7	(9Z,12Z)-2-Hydroxy-9,12-octadecadienoic acid	296.451	107.305	-40.1938	Organic compounds	Lipids and lipid-like molecules	Fatty Acyls	Lineolic acids and derivatives			1.91245	-0.0483395	2.57943	0.526676			1.96666	0.692101	3.10315	0.519722
AFDWAIQLYHEUIW-UHFFFAOYSA-N	[O-][N+](=O)C1=CC2=CC(=CC=C2C=C1)[N+]([O-])=O		[O-][N+](=O)C1=CC2=CC(=CC=C2C=C1)[N+]([O-])=O	24824-27-9	Naphthalene, 2,7-dinitro-	218.168	-134.864	30.3916	Organic compounds	Benzenoids	Naphthalenes	Nitronaphthalenes			1.62202	0.0957734	2.42648	0.511448			0.554823	-0.761888	2.32936	0.462195
AFDXODALSZRGIH-DAXSKMNVSA-N	COC1C=CC(C=CC(O)=O)=CC=1		COC1C=CC(C=CC(O)=O)=CC=1	5676-64-2	2-Propenoic acid, 3-(4-methoxyphenyl)-, (2Z)-	178.187	-9.25282	-13.7107	Organic compounds	Phenylpropanoids and polyketides	Cinnamic acids and derivatives	Cinnamic acids			1.71787	0.625843	2.3758	0.473448			1.56084	0.360541	2.92898	0.51019
AFDXODALSZRGIH-QPJJXVBHSA-N	COC1C=CC(C=CC(O)=O)=CC=1		COC1C=CC(C=CC(O)=O)=CC=1	943-89-5	4-Methoxy-(2E)-cinnamic acid	178.187	-9.25213	-13.711	Organic compounds	Phenylpropanoids and polyketides	Cinnamic acids and derivatives	Cinnamic acids			1.71787	0.625843	2.3758	0.473448			1.56084	0.360541	2.92898	0.51019
AFDXODALSZRGIH-UHFFFAOYSA-N	COC1C=CC(C=CC(O)=O)=CC=1		COC1C=CC(C=CC(O)=O)=CC=1	830-09-1	4-Methoxycinnamic acid	178.187	-9.25213	-13.7111	Organic compounds	Phenylpropanoids and polyketides	Cinnamic acids and derivatives	Cinnamic acids			1.71787	0.625843	2.3758	0.473448			1.56084	0.360541	2.92898	0.51019
AFDYKXLSOHPOJQ-UHFFFAOYSA-M	[Br-].CC1C=C2[Se]C(=CC(C)=CC3[Se]C4=CC(C)=C(C)C=C4[N+]=3CC)N(CC)C2=CC=1C	[Br-]	CC1C=C2[Se]C(=CC(C)=CC3[Se]C4=CC(C)=C(C)C=C4[N+]=3CC)N(CC)C2=CC=1C	51799-69-0	3-Ethyl-2-[3-(3-ethyl-5,6-dimethyl-1,3-benzoselenazol-2(3H)-ylidene)-2-methylprop-1-en-1-yl]-5,6-dimethyl-1,3-benzoselenazol-3-ium bromide	529.468	-102.624	-109.918	Organic compounds	Organic nitrogen compounds	Organonitrogen compounds	Amines			1.43048	-0.426632	2.60925	0.841789			1.04306	-1.27691	3.02708	0.842312
AFEAUYYSRPFHIA-UHFFFAOYSA-N	CC1C=NC2=CC(Cl)=CC=C2C=1NC(C)CCCN(CC)CC		CC1C=NC2=CC(Cl)=CC=C2C=1NC(C)CCCN(CC)CC	85-10-9	4-[(7-Chloro-3-methylquinolin-4(1H)-ylidene)amino]-N,N-diethylpentan-1-amine	333.907	-100.037	93.7984	Organic compounds	Organoheterocyclic compounds	Quinolines and derivatives	Aminoquinolines and derivatives			1.05936	-0.229852	2.36082	0.755201			0.775163	-0.485816	1.92958	0.744046
AFEAYJZKYIUNBF-UHFFFAOYSA-N	Cl.OCC1=CC=CC=C1CNCC1C=CC=CC=1	Cl	OCC1=CC=CC=C1CNCC1C=CC=CC=1	39976-19-7	[2-(Benzylamino-methyl)-phenyl]-methanol hydrochloride	227.307	-53.6617	-71.1394	Organic compounds	Benzenoids	Benzene and substituted derivatives	Phenylmethylamines			1.57116	-0.0180522	2.38733	0.616941			1.15698	-0.302571	2.46882	0.6495
AFEHBIGDWIGTEH-CXFOGXNKSA-N	CSCCC(N)C(=O)NC(CCC(O)=O)C(=O)NC(CC1=CN=CN1)C(=O)NC(CC1C=CC=CC=1)C(=O)N1CCCC1C(=O)NCC(=O)N1CCCC1C(O)=O		CSCCC(N)C(=O)NC(CCC(O)=O)C(=O)NC(CC1=CN=CN1)C(=O)NC(CC1C=CC=CC=1)C(=O)N1CCCC1C(=O)NCC(=O)N1CCCC1C(O)=O	80714-61-0	N-{[1-(N-{2-[(2-{[2-Amino-1-hydroxy-4-(methylsulfanyl)butylidene]amino}-4-carboxy-1-hydroxybutylidene)amino]-1-hydroxy-3-(1H-imidazol-5-yl)propylidene}phenylalanyl)pyrrolidin-2-yl](hydroxy)methylidene}glycylproline	813.935	50.7404	88.3696	Organic compounds	Organic acids and derivatives	Carboxylic acids and derivatives	Amino acids, peptides, and analogues			2.17336	0.146591	2.90567	0.768199			1.67143	-0.810971	2.86976	0.782865
AFEITPOSEVENMK-UHFFFAOYSA-N	OCCN1CCNC1=S		OCCN1CCNC1=S	932-49-0	2-Imidazolidinethione, 1-(2-hydroxyethyl)-	146.215	52.5991	25.4075	Organic compounds	Organoheterocyclic compounds	Azolidines	Imidazolidines			0.567429	-0.761956	2.06282	0.631477			0.771873	-0.659079	2.11859	0.739082
AFENDNXGAFYKQO-GSVOUGTGSA-N	CCC(O)C(O)=O		CCC(O)C(O)=O	20016-85-7	(R)-2-Hydroxybutanoic acid	104.105	55.5726	-63.831	Organic compounds	Organic acids and derivatives	Hydroxy acids and derivatives	Alpha hydroxy acids and derivatives			1.82018	0.408135	2.67474	0.54403			2.11952	0.550661	3.01617	0.591515
AFENDNXGAFYKQO-UHFFFAOYSA-N	CCC(O)C(O)=O		CCC(O)C(O)=O	600-15-7	DL-2-Hydroxybutyric acid	104.105	55.5739	-63.8321	Organic compounds	Organic acids and derivatives	Hydroxy acids and derivatives	Alpha hydroxy acids and derivatives			1.82018	0.408135	2.67474	0.54403			2.11952	0.550661	3.01617	0.591515
AFENDNXGAFYKQO-VKHMYHEASA-N	CCC(O)C(O)=O		CCC(O)C(O)=O	3347-90-8	(S)-2-Hydroxybutyric acid	104.105	55.5725	-63.8323	Organic compounds	Organic acids and derivatives	Hydroxy acids and derivatives	Alpha hydroxy acids and derivatives			1.82018	0.408135	2.67474	0.54403			2.11952	0.550661	3.01617	0.591515
AFEOKIGLYCQHAZ-UHFFFAOYSA-N	OCC1C=C(CC2C=CC=CC=2)OC=1		OCC1C=C(CC2C=CC=CC=2)OC=1	20416-09-5	3-Furanmethanol, 5-(phenylmethyl)-	188.226	8.39559	-31.106	Organic compounds	Benzenoids	Benzene and substituted derivatives				1.63595	0.423627	2.33475	0.60777			1.4099	0.0734892	3.13654	0.620092
AFEORBFSJSJGDW-UHFFFAOYSA-N	CC1=CC(CC2C=CC(N)=CC=2)=CC=C1N		CC1=CC(CC2C=CC(N)=CC=2)=CC=C1N	64497-21-8	4-[(4-Aminophenyl)methyl]-2-methylaniline	212.296	-94.8921	-21.0692	Organic compounds	Benzenoids	Benzene and substituted derivatives	Diphenylmethanes			1.11294	0.279742	2.08608	0.575125			0.465418	-0.666246	1.84474	0.466374
AFERVIBWARYXAW-UHFFFAOYSA-N	CC(C)(C1C=CC=CC=1)C1C=CC(=CC=1)OCC=C		CC(C)(C1C=CC=CC=1)C1C=CC(=CC=1)OCC=C	68443-36-7	Benzene, 1-(1-methyl-1-phenylethyl)-4-(2-propen-1-yloxy)-	252.357	-6.05478	-92.6698	Organic compounds	Benzenoids	Benzene and substituted derivatives	Diphenylmethanes			1.41686	-0.0850311	2.31311	0.551209			0.880442	-0.191149	1.97069	0.638404
AFERZLYRSYSCMW-UHFFFAOYSA-N	[O-][N+](=O)C1=CC(O)=C(C2C(Cl)=CC(=CC=2O)[N+]([O-])=O)C(Cl)=C1		[O-][N+](=O)C1=CC(O)=C(C2C(Cl)=CC(=CC=2O)[N+]([O-])=O)C(Cl)=C1	21832-25-7	["6,6'-Dichloro-4,4'-dinitro[biphenyl]-2,2'-diol"]	345.094	-140.774	6.81301	Organic compounds	Benzenoids	Benzene and substituted derivatives	Biphenyls and derivatives			1.99635	-0.359315	2.89422	0.562454			0.933948	-1.90692	2.42327	0.546454
AFEYPUTUUQHPJT-UHFFFAOYSA-N	C1C2CC3(CCC=C31)CC2		C1C2CC3(CCC=C31)CC2	98640-10-9	3a,6-methano-3ah-indene, 2,3,4,5,6,7-hexahydro-	134.222	89.6128	90.0138	Organic compounds	Lipids and lipid-like molecules	Prenol lipids	Monoterpenoids			1.78755	0.266019	2.438	0.79644			0.601156	-1.21348	1.92475	0.829927
AFFISXLBJAWJBH-BQYQJAHWSA-N	C[n]1c(N)c(c(=O)[nH]c1=O)C(=O)C=CC1C=CC=CC=1		C[n]1c(N)c(c(=O)[nH]c1=O)C(=O)C=CC1C=CC=CC=1	94597-56-5	MLS000756899	271.276	-5.97204	-18.3497	Organic compounds	Phenylpropanoids and polyketides	Cinnamic acids and derivatives				1.91149	0.485481	2.62222	0.674771			1.19448	-0.243406	2.69219	0.708588
AFFLAKUHPBBSGC-CMDGGOBGSA-N	CC(OCC)OCCCCCCC=CC#CCC		CC(OCC)OCCCCCCC=CC#CCC	58763-67-0	5-Dodecen-3-yne, 12-(1-ethoxyethoxy)-, (5E)-	252.398	127.509	-71.0765	Organic compounds	Organic oxygen compounds	Organooxygen compounds	Ethers			1.97659	0.575382	2.6579	0.718674			1.54395	-0.348844	2.5236	0.736218
AFFLEALSHYGOOD-NOURLPFCSA-N	CN1CC(C=C2C1CC1C3C(=CC=CC2=3)NC=1C)C(=O)NC1(OC2(O)C3CCCN3C(=O)C(CC(C)C)N2C1=O)C(C)C		CN1CC(C=C2C1CC1C3C(=CC=CC2=3)NC=1C)C(=O)NC1(OC2(O)C3CCCN3C(=O)C(CC(C)C)N2C1=O)C(C)C	81968-16-3	N-[10b-Hydroxy-5-(2-methylpropyl)-3,6-dioxo-2-(propan-2-yl)octahydro-8H-[1,3]oxazolo[3,2-a]pyrrolo[2,1-c]pyrazin-2-yl]-2,6-dimethyl-9,10-didehydroergoline-8-carboximidic acid	589.737	1.66556	173.104	Organic compounds	Alkaloids and derivatives	Ergoline and derivatives	Lysergic acids and derivatives			1.67455	-0.498365	2.78123	0.807873			0.868218	-1.49423	2.65241	0.810325
AFFLGGQVNFXPEV-UHFFFAOYSA-N	CCCCCCCCC=C		CCCCCCCCC=C	872-05-9	1-Decene	140.27	143.918	-82.484	Organic compounds	Hydrocarbons	Unsaturated hydrocarbons	Unsaturated aliphatic hydrocarbons	2.23601	2.23601	2.21827	1.52346	2.69122	0	1.71595	1.71595	1.71504	0.902875	2.3668	0
AFFPCIMDERUIST-UHFFFAOYSA-N	C[Si](C)(C)OC(=C)C1C=CC=CC=1		C[Si](C)(C)OC(=C)C1C=CC=CC=1	13735-81-4	Benzene, [1-[(trimethylsilyl)oxy]ethenyl]-	192.334	-32.1887	-32.9314	Organic compounds	Benzenoids	Benzene and substituted derivatives	Styrenes			1.41202	-1.12857	2.28955	0.623603			1.07562	-0.502191	2.18253	0.648638
AFFPZJFLSDVZBV-UHFFFAOYSA-N	NS(=O)(=O)C1=CC=CC=C1C(F)(F)F		NS(=O)(=O)C1=CC=CC=C1C(F)(F)F	1869-24-5	2-(Trifluoromethyl)benzenesulfonamide	225.191	-86.7719	-25.4865	Organic compounds	Benzenoids	Benzene and substituted derivatives	Benzenesulfonamides			1.27673	-0.578468	2.36343	0.650875			0.772711	-1.30397	2.34211	0.708405
AFFQPCNKJKMLTE-UHFFFAOYSA-N	Cl.CC(C)(CC1C=CC=CC=1)N(C)C(=O)CN(CCO)CC(=O)N(C)C(C)(C)CC1C=CC=CC=1	Cl	CC(C)(CC1C=CC=CC=1)N(C)C(=O)CN(CCO)CC(=O)N(C)C(C)(C)CC1C=CC=CC=1	13930-31-9	Oxethazaine hydrochloride	467.654	-36.5004	-74.1202	Organic compounds	Benzenoids	Benzene and substituted derivatives	Phenethylamines			1.92643	0.303422	2.63137	0.64059			1.04018	-0.0985829	2.52748	0.688094
AFFSZNHAULCEKY-AFGHJBDBSA-N	CC1C=C(C)C(OC(N)=O)C(C=CC=C(C)C(=O)NC2=CC(O)=C(O)C(C=C(C)CC(OC)C1O)=C2O)OC		CC1C=C(C)C(OC(N)=O)C(C=CC=C(C)C(=O)NC2=CC(O)=C(O)C(C=C(C)CC(OC)C1O)=C2O)OC	52762-28-4	17-Desmethylgeldanamycin	546.617	69.5883	122.077	Organic compounds	Phenylpropanoids and polyketides	Macrolactams				2.18044	0.166156	3.04252	0.794222			1.60136	-1.53324	2.91998	0.778207
AFFXEGNIYQJTQQ-UHFFFAOYSA-N	O=C(NCC1C=CC=CC=1)C(Br)C1C=CC=CC=1		O=C(NCC1C=CC=CC=1)C(Br)C1C=CC=CC=1	17172-88-2	N-Benzyl-2-bromo-2-phenylethanimidic acid	304.187	-54.6466	-65.9965	Organic compounds	Benzenoids	Benzene and substituted derivatives	Phenylacetamides			1.2858	-0.391567	2.26755	0.630233			0.801964	-0.41156	2.13382	0.683994
AFFXNOIULZQAML-UHFFFAOYSA-N	CC1=CC(Cl)=C(C=C1O)C(C)C		CC1=CC(Cl)=C(C=C1O)C(C)C	5665-94-1	Carvasept	184.666	-75.8027	-7.20066	Organic compounds	Lipids and lipid-like molecules	Prenol lipids	Monoterpenoids			1.35887	0.0319562	2.43206	0.629825			0.991768	-0.513911	2.04221	0.651709
AFFZTFNQQHNSEG-UHFFFAOYSA-N	CC(=C)C(=O)OC(F)(F)F		CC(=C)C(=O)OC(F)(F)F	56487-95-7	Trifluoromethyl methacrylate	154.087	5.34868	-151.781	Organic compounds	Organic acids and derivatives	Carboxylic acids and derivatives	Carboxylic acid derivatives			1.43566	-0.358776	2.40467	0.528779			1.16414	-0.965158	2.4547	0.570251
AFGACPRTZOCNIW-UHFFFAOYSA-N	CCSC=C		CCSC=C	627-50-9	Ethyl vinyl sulfide	88.175	144.812	-88.5221	Organic compounds	Organosulfur compounds	Thioethers	Thioenol ethers			1.1733	-0.778919	2.37125	0.675455			0.542692	-0.922519	2.28759	0.675455
AFGBRTKUTJQHIP-ZETCQYMHSA-N	CC(C)C(C(O)=O)N1CCCNC1=O		CC(C)C(C(O)=O)N1CCCNC1=O	192725-50-1	(2S)-3-Methyl-2-(2-oxotetrahydropyrimidin-1(2H)-yl)butanoic acid	200.238	48.8574	24.7051	Organic compounds	Organic acids and derivatives	Carboxylic acids and derivatives	Amino acids, peptides, and analogues			1.85141	0.372332	2.52566	0.724331		1.98035	1.09339	-0.439515	2.79834	0.739486
AFGNVSCTEXUEJE-UHFFFAOYSA-N	CCCCCCCCCCCCCCCCCCCCCl		CCCCCCCCCCCCCCCCCCCCCl	42217-02-7	Chloroicosane	317.001	104.786	-124.051	Organic compounds	Organohalogen compounds	Organochlorides				1.80504	0.10452	2.68626	0.287912			1.54358	-0.0186349	2.93449	0.287912
AFGPCIMUGMJQPD-UHFFFAOYSA-L	[Na+].[Na+].[O-]S(=O)(=O)C1C=C(O)C2C(C=1)=CC(=CC=2O)S([O-])(=O)=O	[Na+]	OC1C=C(C=C2C=C(C=C(O)C=12)S(O)(=O)=O)S(O)(=O)=O	129-96-4	2,7-Naphthalenedisulfonic acid, 4,5-dihydroxy-, disodium salt	320.3	-139.707	-33.957	Organic compounds	Benzenoids	Naphthalenes	Naphthalene sulfonic acids and derivatives			1.97265	0.867689	2.58737	0.541382			1.64048	-0.201263	2.75684	0.637193
AFGPVXVFZRRJGM-UHFFFAOYSA-N	O=C(NC1C=CC(CC2C=CC(=CC=2)NC(=O)NC2C=CC=CC=2)=CC=1)NC1C=CC=CC=1		O=C(NC1C=CC(CC2C=CC(=CC=2)NC(=O)NC2C=CC=CC=2)=CC=1)NC1C=CC=CC=1	13140-83-5	["Urea, N,N''-(methylenedi-4,1-phenylene)bis[N'-phenyl-"]	436.515	-82.5197	-63.8202	Organic compounds	Benzenoids	Benzene and substituted derivatives	Diphenylmethanes			2.08524	0.330189	2.69396	0.480867			1.51455	-0.042084	2.78741	0.544761
AFGQXWSHYUHHNV-UHFFFAOYSA-N	CCC(O)=O.CCC(O)=O.O=C(NC1C=C(C=CC=1)C1NCCN=1)NC1C=C(C=CC=1)C1NCCN=1	CCC(=O)O	O=C(NC1C=C(C=CC=1)C1NCCN=1)NC1C=C(C=CC=1)C1NCCN=1	55750-06-6	Imidocarb dipropionate	348.41	-26.9238	48.4397	Organic compounds	Benzenoids	Benzene and substituted derivatives	N-phenylureas			1.80082	0.234979	2.56466	0.65964			1.19692	-0.154522	2.50501	0.657071
AFGUVBVUFZMJMX-UHFFFAOYSA-N	CCCCCCCCC=CCCCC(O)=O		CCCCCCCCC=CCCCC(O)=O	5684-70-8	Tetradec-5-enoic acid	226.36	88.1413	-35.6467	Organic compounds	Lipids and lipid-like molecules	Fatty Acyls	Fatty acids and conjugates			2.06267	0.938379	2.7289	0.283333			1.82161	0.904221	2.82962	0.279167
AFHFHXVRHACYSR-UHFFFAOYSA-N	CCC(=O)C1C=CN=CC=1		CCC(=O)C1C=CN=CC=1	1701-69-5	1-Propanone, 1-(4-pyridyl)-	135.166	-42.1688	-42.8807	Organic compounds	Organic oxygen compounds	Organooxygen compounds	Carbonyl compounds			1.59725	0.172032	2.25616	0.677375			0.799592	-0.573571	2.03788	0.686663
AFHJQYHRLPMKHU-OSYMLPPYSA-N	OC1C(O)C(OC(CO)C1O)C1C2=CC(CO)=CC(O)=C2C(O)=C2C=1C=CC=C2O		OC1C(O)C(OC(CO)C1O)C1C2=CC(CO)=CC(O)=C2C(O)=C2C=1C=CC=C2O	1415-73-2	Aloin A	418.398	36.7771	161.886	Organic compounds	Benzenoids	Anthracenes				2.21257	0.756116	2.95178	0.747322			1.89345	-1.09981	3.10611	0.749389
AFHJQYHRLPMKHU-WEZNYRQKSA-N	OC1C(O)C(OC(CO)C1O)C1C2=CC(CO)=CC(O)=C2C(O)=C2C=1C=CC=C2O		OC1C(O)C(OC(CO)C1O)C1C2=CC(CO)=CC(O)=C2C(O)=C2C=1C=CC=C2O	28371-16-6	Aloin B	418.398	36.7771	161.886	Organic compounds	Benzenoids	Anthracenes				2.21257	0.756116	2.95178	0.747322			1.89345	-1.09981	3.10611	0.749389
AFHJYKBGDDJSRR-UHFFFAOYSA-N	CC(C)OCC(C)O		CC(C)OCC(C)O	3944-36-3	1-Isopropoxy-2-propanol	118.176	115.494	-79.3966	Organic compounds	Organic oxygen compounds	Organooxygen compounds	Alcohols and polyols			2.01393	1.03207	2.80333	0.51763			1.80317	0.932815	2.65028	0.503796
AFHMCCYRILDPQC-UHFFFAOYSA-N	CC1C=CC(=CC=1)S(=O)(=O)C(NC(=O)OC)C(O)=O		CC1C=CC(=CC=1)S(=O)(=O)C(NC(=O)OC)C(O)=O	41141-95-1	Acetic acid, 2-[(methoxycarbonyl)amino]-2-[(4-methylphenyl)sulfonyl]-	287.293	-119.027	-49.9627	Organic compounds	Organic acids and derivatives	Carboxylic acids and derivatives	Amino acids, peptides, and analogues			1.77128	0.151674	2.52285	0.617727			1.27186	-0.393022	2.51348	0.631724
AFHPVXVEXINDFS-UHFFFAOYSA-N	FC(F)(F)C(F)(F)C(F)(F)CI		FC(F)(F)C(F)(F)C(F)(F)CI	374-98-1	Heptafluorobutyl iodide	309.95	20.0658	-153.93	Organic compounds	Organohalogen compounds	Organoiodides				0.959123	-1.12703	2.43426	0.692976			0.142073	-2.06732	2.13005	0.70932
AFHRHKTUTFIHHJ-UHFFFAOYSA-N	CC(COCC(O)CC(F)(F)C(F)(F)C(F)(F)C(F)(F)C(F)(F)C(F)(F)C(F)(F)C(F)(F)C(F)(F)C(F)(F)C(F)(C(F)(F)F)C(F)(F)F)OC(C)COCC(O)CC(F)(F)C(F)(F)C(F)(F)C(F)(F)C(F)(F)C(F)(F)C(F)(F)C(F)(F)C(F)(F)C(F)(F)C(F)(C(F)(F)F)C(F)(F)F		CC(COCC(O)CC(F)(F)C(F)(F)C(F)(F)C(F)(F)C(F)(F)C(F)(F)C(F)(F)C(F)(F)C(F)(F)C(F)(F)C(F)(C(F)(F)F)C(F)(F)F)OC(C)COCC(O)CC(F)(F)C(F)(F)C(F)(F)C(F)(F)C(F)(F)C(F)(F)C(F)(F)C(F)(F)C(F)(F)C(F)(F)C(F)(C(F)(F)F)C(F)(F)F	93776-03-5	["1,1'-(Oxybis((1-methylethylene)oxy))bis(3-(perfluoro-11-methyldodecyl)propan-2-ol)"]	1586.5	12.053	-167.075	Organic compounds	Organic oxygen compounds	Organooxygen compounds	Alcohols and polyols			-0.210301	-0.463858	2.7933	0.750835			1.30146	-0.991607	3.37018	0.750835
AFHSLLLKMSITIA-UHFFFAOYSA-N	CC1CC(=O)NC2=CC=CC=C2N=1		CC1CC(=O)NC2=CC=CC=C2N=1	6276-48-8	1,3-Dihydro-4-methyl-2H-1,5-benzodiazepin-2-one	174.203	-42.5225	77.0615	Organic compounds	Organoheterocyclic compounds	Benzodiazepines				1.5536	0.285429	2.29365	0.733821			0.975777	-0.415538	2.20255	0.751967
AFIAHUCZUURHQW-UHFFFAOYSA-N	O=C1CC(CC2=CC=CC=C21)C1C=CC(=CC=1)C1C=CC=CC=1		O=C1CC(CC2=CC=CC=C21)C1C=CC(=CC=1)C1C=CC=CC=1	56181-65-8	["3-([1,1'-Biphenyl]-4-yl)-3,4-dihydronaphthalen-1(2H)-one"]	298.385	34.3102	78.3189	Organic compounds	Benzenoids	Naphthalenes	Phenylnaphthalenes			1.37657	-0.096271	2.3777	0.678173			0.948118	-0.178971	2.27264	0.685504
AFIDDEUBFNDBGR-UHFFFAOYSA-N	CC(=O)c1cc2c(cc1)oc1ccccc1c2=O		CC(=O)c1cc2c(cc1)oc1ccccc1c2=O	36039-22-2	2-acetylxanthen-9-one	238.242	-84.8535	114.881	Organic compounds	Organoheterocyclic compounds	Benzopyrans	1-benzopyrans			1.97037	0.830422	2.69471	0.644152			1.53649	-0.0457211	2.61864	0.62246
AFIHOTTTWXQFDO-UHFFFAOYSA-N	CN(C)C(N)=NC(N)=N.OC(=O)C(O)(CC(O)=O)CC(O)=O	OC(C(CC(=O)O)(CC(=O)O)O)=O	CN(C)C(N)=NC(N)=N	94134-19-7	1,1-Dimethylbiguanide citrate	129.167	63.592	-99.2594	Organic compounds	Organic acids and derivatives	Carboxylic acids and derivatives	Tricarboxylic acids and derivatives	1.95133		1.84335	0.57238	2.49847	0.597535	1.10415		1.03505	-0.0518926	2.15729	0.610057
AFIIBUOYKYSPKB-UHFFFAOYSA-N	CSC1N=C(N=[N+]=[N-])N=C(NC(C)C)N=1		CSC1N=C(N=[N+]=[N-])N=C(NC(C)C)N=1	4658-28-0	Aziprotryne	225.281	15.0575	-89.9569	Organic compounds	Organoheterocyclic compounds	Triazines	1,3,5-triazines			0.8695	-0.413977	2.50318	0.584902			0.734907	-0.644482	1.85071	0.584902
AFILDYMJSTXBAR-UHFFFAOYSA-N	CCO[Si](OCC)(OCC)C1C=CC(Cl)=CC=1		CCO[Si](OCC)(OCC)C1C=CC(Cl)=CC=1	21700-74-3	(4-Chlorophenyl)triethoxysilane	274.82	-67.6754	-90.6773	Organic compounds	Organometallic compounds	Organometalloid compounds	Organosilicon compounds			1.14264	-0.796445	2.41417	0.613657			0.848915	-1.29925	2.14875	0.656105
AFIMJRRIIXAUAJ-UHFFFAOYSA-M	[Na+].CCN(CC)C(=S)SCCS([O-])(=O)=O	[Na+]	CCN(CC)C(=S)SCCS(O)(=O)=O	5353-48-0	Sodium 2-(((diethylamino)thioxomethyl)thio)ethanesulphonate	257.402	40.1907	-94.8666	Organic compounds	Organic acids and derivatives	Organic sulfonic acids and derivatives	Organosulfonic acids and derivatives			0.749959	-1.24013	2.31678	0.728347			0.690654	-1.36721	2.18001	0.68846
AFINVMDZLRAKEV-UHFFFAOYSA-N	CC(=O)N1CCN=C1NC1C(Cl)=CC=CC=1Cl		CC(=O)N1CCN=C1NC1C(Cl)=CC=CC=1Cl	54707-71-0	1-[2-[(2,6-Dichlorophenyl)amino]-4,5-dihydro-1H-imidazol-1-yl]ethanone	272.135	-23.3985	53.8892	Organic compounds	Benzenoids	Benzene and substituted derivatives	Halobenzenes			0.976803	-0.425069	2.14106	0.721259			0.677036	-0.392153	1.98981	0.725704
AFIOJKXUVZFDHY-HGSORSNPSA-M	[K+].CC(O)C1C2OC(=C(C([O-])=O)N2C1=O)C(C)(C)CNC(=O)CN1C=NN=N1	[K+]	CC(O)C1C2OC(=C(C(O)=O)N2C1=O)C(C)(C)CNC(=O)CN1C=NN=N1	675839-33-5	AM 152	380.361	57.7218	111.658	Organic compounds	Organic acids and derivatives	Carboxylic acids and derivatives	Amino acids, peptides, and analogues			1.95083	0.36119	2.87775	0.796474			1.64556	-1.14174	2.76416	0.79382
AFIUIJXKXMMNCK-UHFFFAOYSA-N	COc1c(=O)c2ccccc2oc1C1C=CC(=CC=1)OC		COc1c(=O)c2ccccc2oc1C1C=CC(=CC=1)OC	78933-14-9	ST057645	282.295	-84.8792	118.494	Organic compounds	Phenylpropanoids and polyketides	Flavonoids	O-methylated flavonoids			1.79677	0.336302	2.52347	0.674586			1.05629	-0.217881	2.47413	0.663998
AFIYKNJKFJVVGS-UHFFFAOYSA-N	CCOC(=O)NC1C=C2C(CCC3=CC=CC=C3N2C(=O)CCN(CC)CC)=CC=1		CCOC(=O)NC1C=C2C(CCC3=CC=CC=C3N2C(=O)CCN(CC)CC)=CC=1	83275-55-2	Carbamic acid, (5-(3-(diethylamino)-1-oxopropyl)-10,11-dihydro-5H-dibenz(b,f)azepin-3-yl)-, ethyl ester	409.53	-28.0144	85.0663	Organic compounds	Organoheterocyclic compounds	Benzazepines	Dibenzazepines			1.46813	0.0895963	2.46034	0.707673			0.84649	-0.479034	2.38505	0.695047
AFJCGBHHSKAACR-UHFFFAOYSA-L	[Br-].[Br-].CC1=C(CCO)SC=[N+]1CCCCCCCCCCCC[N+]1=CSC(CCO)=C1C	[Br-]	CC1=C(CCO)SC=[N+]1CCCCCCCCCCCC[N+]1=CSC(CCO)=C1C	321915-72-4	Albitiazolium bromide	454.746	10.6749	6.48372	Organic compounds	Organoheterocyclic compounds	Azoles	Thiazoles			1.54629	-0.260626	3.1434	0.735445			1.02281	-0.638422	2.61948	0.794118
AFJCNBBHEVLGCZ-UHFFFAOYSA-N	O.CC(N=C(NC#N)N=c1cc[nH]cc1)C(C)(C)C	O	CC(N=C(NC#N)N=c1cc[nH]cc1)C(C)(C)C	85371-64-8	Pinacidil monohydrate	245.33	4.59149	-85.8113	Organic compounds	Organoheterocyclic compounds	Pyridines and derivatives	Hydropyridines			1.587	-0.217539	2.4372	0.787013			0.826771	-0.483381	2.30592	0.791954
AFJDBZRJNZQTNO-UHFFFAOYSA-N	O=C(CCN1CC1)OCC(F)(F)C(F)(F)F		O=C(CCN1CC1)OCC(F)(F)C(F)(F)F	24116-27-6	1-Aziridinepropionic acid, 2,2,3,3,3-pentafluoropropyl ester	247.163	68.4671	17.7152	Organic compounds	Organic acids and derivatives	Carboxylic acids and derivatives	Carboxylic acid derivatives			1.34031	-0.622439	2.4372	0.70661			0.633535	-1.37453	2.36268	0.700635
AFJDKYQZVDGXBX-UHFFFAOYSA-N	CCCCCCCCNC(CO)(CO)CO		CCCCCCCCNC(CO)(CO)CO	100543-12-2	2-(hydroxymethyl)-2-(octylamino)propane-1,3-diol	233.352	85.5201	-112.054	Organic compounds	Organic nitrogen compounds	Organonitrogen compounds	Amines			2.09842	1.02807	2.68788	0.583333			1.85934	0.1239	2.91033	0.583333
AFJPGVUCVDCFPM-LNKIKWGQSA-N	CC=C1C[N+]2(C)CCC34C5=CC=CC=C5NC23C(O)CC1C4(CO)C(=O)OC		CC=C1C[N+]2(C)CCC34C5=CC=CC=C5NC23C(O)CC1C4(CO)C(=O)OC	6878-36-0	Echitamine chloride	385.484	-31.4404	153.625	Organic compounds	Organoheterocyclic compounds	Indoles and derivatives	Carbazoles			1.34975	-3.3308	2.59042	0.790096			0.68915	-3.03724	2.532	0.795901
AFJPGVUCVDCFPM-MLIPYVIESA-N	CC=C1C[N+]2(C)CCC34C5=CC=CC=C5NC23C(O)CC1C4(CO)C(=O)OC		CC=C1C[N+]2(C)CCC34C5=CC=CC=C5NC23C(O)CC1C4(CO)C(=O)OC	6871-44-9	Echitamine	385.484	-32.2573	154.289	Organic compounds	Organoheterocyclic compounds	Indoles and derivatives	Carbazoles			1.34975	-3.3308	2.59042	0.790096			0.68915	-3.03724	2.532	0.795901
AFJQTXMEFXBCIN-UHFFFAOYSA-N	CC(C)(C)S(=O)(=O)C1=CN=C(N=C1N)C1=CC=CC=N1		CC(C)(C)S(=O)(=O)C1=CN=C(N=C1N)C1=CC=CC=N1	175202-19-4	5-(2-Methylpropane-2-sulfonyl)-2-(pyridin-2-yl)pyrimidin-4-amine	292.364	-65.4906	22.8909	Organic compounds	Organoheterocyclic compounds	Diazines	Pyrimidines and pyrimidine derivatives			1.46216	-0.283664	2.44838	0.738627			0.822708	-0.683562	2.25041	0.738627
AFJRDFWMXUECEW-LBPRGKRZSA-N	CN1N=CC(Cl)=C1C1C=C(SC=1Cl)C(=O)NC(CN)CC1C=C(F)C=CC=1		CN1N=CC(Cl)=C1C1C=C(SC=1Cl)C(=O)NC(CN)CC1C=C(F)C=CC=1	1047644-62-1	Afuresertib	427.332	14.2216	-34.9018	Organic compounds	Benzenoids	Benzene and substituted derivatives	Phenethylamines			1.34958	-0.341715	2.59523	0.759272			0.80007	-0.506893	2.27748	0.759024
AFJSFHAKSSWOKG-UHFFFAOYSA-N	Cl.O=C(NC1CCN(CCC2=CNC3=CC=CC=C23)CC1)C1C=CC=CC=1	Cl	O=C(NC1CCN(CCC2=CNC3=CC=CC=C23)CC1)C1C=CC=CC=1	38821-52-2	Indoramin hydrochloride	347.462	-43.8748	126.599	Organic compounds	Organoheterocyclic compounds	Indoles and derivatives	Tryptamines and derivatives			1.54343	0.178687	2.44319	0.721146			0.924109	-0.213373	2.34408	0.682166
AFJVNCDRAOOULN-UHFFFAOYSA-N	CCCC(C)CC(C)CCC(O)=O		CCCC(C)CC(C)CCC(O)=O	56078-94-5	4,6-Dimethylnonanoic acid	186.295	106.1	-47.3408	Organic compounds	Lipids and lipid-like molecules	Fatty Acyls	Fatty acids and conjugates			1.80776	0.664051	2.53248	0.583381			1.42002	0.364193	2.34973	0.574122
AFJWMGOTLUUGHF-UHFFFAOYSA-N	OC1NC(O)=C2CCC=CC=12		OC1NC(O)=C2CCC=CC=12	4720-86-9	3-Hydroxy-4,5,6,7-tetrahydro-1H-isoindol-1-one	151.165	60.6158	78.1839	Organic compounds	Organoheterocyclic compounds	Isoindoles and derivatives	Isoindolines			1.72499	0.570537	2.46749	0.831682			1.34015	-0.156709	2.45351	0.817464
AFJYYKSVHJGXSN-XHKIUTQPSA-N	COC1CC(OC(C)C1O)OC1C(C)C=CC=C2COC3C(=NO)C(C)=CC(C(=O)OC4CC(CC=C1C)OC1(C4)CCC(C)C(O1)C1CCCCC1)C23O		COC1CC(OC(C)C1O)OC1C(C)C=CC=C2COC3C(=NO)C(C)=CC(C(=O)OC4CC(CC=C1C)OC1(C4)CCC(C)C(O1)C1CCCCC1)C23O	220119-17-5	Selamectin	769.973	72.4535	122.601	Organic compounds	Phenylpropanoids and polyketides	Macrolides and analogues	Milbemycins			1.3072	-0.326027	2.75121	0.671573			0.263122	-1.31226	2.71332	0.669318
AFKJTHQMVIWPPA-UHFFFAOYSA-N	CN(C)c1ccc2c([n]1)[n](C)c(=O)cc2OC		CN(C)c1ccc2c([n]1)[n](C)c(=O)cc2OC	57980-10-6	7-(Dimethylamino)-4-methoxy-1-methyl-1,8-naphthyridin-2(1H)-one	233.271	-41.1356	113.493	Organic compounds	Organoheterocyclic compounds	Diazanaphthalenes	Naphthyridines			1.65108	-0.231437	2.4192	0.743324			0.972944	-0.530572	2.36586	0.746011
AFKLSWIRJUJWKY-UHFFFAOYSA-N	OCC1C=C(C=CC=1)OCC1C=CC=CC=1		OCC1C=C(C=CC=1)OCC1C=CC=CC=1	1700-30-7	4-Benzyloxybenzyl alcohol	214.264	1.43977	-36.0565	Organic compounds	Benzenoids	Phenol ethers				1.71483	0.587061	2.4044	0.552909			1.46285	0.182647	2.82999	0.563446
AFKMHDZOVNDWLO-UHFFFAOYSA-N	OC1CCC(CC1)C1CCCCC1		OC1CCC(CC1)C1CCCCC1	2433-14-9	4-Cyclohexylcyclohexanol	182.307	107.202	49.8201	Organic compounds	Organic oxygen compounds	Organooxygen compounds	Alcohols and polyols			1.8243	0.421505	2.47244	0.618768			1.10487	-0.328099	2.21987	0.640714
AFKNCQDBTBDPOQ-UHFFFAOYSA-N	C[n]1c2ccccc2c(=O)cc1C1C=CC=CC=1		C[n]1c2ccccc2c(=O)cc1C1C=CC=CC=1	17182-60-4	4(1H)-Quinolinone, 1-methyl-2-phenyl-	235.286	-72.0903	72.8775	Organic compounds	Organoheterocyclic compounds	Quinolines and derivatives	Phenylquinolines			1.66478	0.0804924	2.40434	0.69902			1.08729	-0.314836	2.27843	0.710154
AFKRLUUCCIMVQP-UHFFFAOYSA-N	CC(CC1C=CC=CC=1)N=C=S		CC(CC1C=CC=CC=1)N=C=S	16220-05-6	(2-Isothiocyanatopropyl)benzene	177.272	-6.57212	-55.7831	Organic compounds	Benzenoids	Benzene and substituted derivatives	Phenethylamines			1.04827	-0.517952	2.2397	0.684081			0.722354	-0.590651	1.8656	0.687928
AFKRZUUZFWTBCC-WSTZPKSXSA-N	CC1(C)SC2C(NC(=O)CC3C=CC=CC=3)C(=O)N2C1C(=O)OCCN(CC)CC		CC1(C)SC2C(NC(=O)CC3C=CC=CC=3)C(=O)N2C1C(=O)OCCN(CC)CC	3689-73-4	Penethamate	433.574	20.1366	149.71	Organic compounds	Organoheterocyclic compounds	Lactams	Beta lactams			1.41159	-0.907058	2.40281	0.716958			0.933844	-1.33491	2.57908	0.632641
AFLDFEASYWNJGX-FOHXBPHZNA-N	Cl.CC(C)NC(C)CC1C=CC([123I])=CC=1	Cl	CC(C)NC(C)CC1C=CC(I)=CC=1	85068-76-4	Iofetamine hydrochloride I 123	303.187	-8.92799	-52.7206	Organic compounds	Benzenoids	Benzene and substituted derivatives	Phenethylamines			1.28495	-0.320624	2.82866	0.689654			0.798318	-0.673738	2.25548	0.726105
AFLDFEASYWNJGX-UHFFFAOYSA-N	Cl.CC(C)NC(C)CC1C=CC(I)=CC=1	Cl	CC(C)NC(C)CC1C=CC(I)=CC=1	82691-32-5	Iofetamine hydrochloride	303.187	-8.93325	-52.7147	Organic compounds	Benzenoids	Benzene and substituted derivatives	Phenethylamines			1.28495	-0.320624	2.82866	0.689654			0.798318	-0.673738	2.25548	0.726105
AFLFKFHDSCQHOL-IZZDOVSWSA-N	CC1C=C(C=CC(=O)C2C=CC(=CC=2)SC)C=C(C)C=1OC(C)(C)C(O)=O		CC1C=C(C=CC(=O)C2C=CC(=CC=2)SC)C=C(C)C=1OC(C)(C)C(O)=O	923978-27-2	Elafibranor	384.497	-9.2419	-20.2193	Organic compounds	Phenylpropanoids and polyketides	Linear 1,3-diarylpropanoids	Chalcones and dihydrochalcones			1.27891	-0.415488	2.5489	0.737972			0.869392	-0.762333	2.47812	0.742896
AFLIUYLJECKEJV-UHFFFAOYSA-M	[Ag+].CCCCC([S-])(CC)CC	[Ag+]	CCCCC(S)(CC)CC	67952-62-9	Silver(1+) 3-ethylheptane-3-thiolate	160.326	81.4617	-122.55	Organic compounds	Organic salts	Organic metal salts	Organic transition metal salts			1.29748	0.00568496	2.36524	0.662745			0.845196	-0.753652	2.10116	0.642157
AFLKBESYVTWUMU-UHFFFAOYSA-N	CCC(=O)N(C1C=CC=CC=1)C1(COC)CCN(CC2C=CC=CC=2)CC1.OC(=O)C(O)=O	OC(C(=O)O)=O	CCC(=O)N(C1C=CC=CC=1)C1(COC)CCN(CC2C=CC=CC=2)CC1	61086-13-3	N-(1-Benzyl-4-(methoxymethyl)-4-piperidyl)-N-phenylpropionamide oxalate	366.505	23.1984	70.565	Organic compounds	Organoheterocyclic compounds	Piperidines	Benzylpiperidines			1.35215	-0.65734	2.34296	0.693722			0.859023	-0.385478	2.26914	0.709373
AFLKKLSCQQGOEK-LLVKDONJSA-N	CC(C)C(O)CC1C=CC=CC=1		CC(C)C(O)CC1C=CC=CC=1	63674-19-1	(Î±R)-Î±-(1-Methylethyl)benzeneethanol	164.248	-5.68353	-55.5874	Organic compounds	Benzenoids	Benzene and substituted derivatives				1.56509	0.590651	2.28911	0.591001			1.43503	0.0996847	2.5981	0.606537
AFLKKLSCQQGOEK-UHFFFAOYSA-N	CC(C)C(O)CC1C=CC=CC=1		CC(C)C(O)CC1C=CC=CC=1	705-58-8	Benzeneethanol, .alpha.-(1-methylethyl)-	164.248	-5.68336	-55.5879	Organic compounds	Benzenoids	Benzene and substituted derivatives				1.56509	0.590651	2.28911	0.591001			1.43503	0.0996847	2.5981	0.606537
AFLLVELQLSQJHK-UHFFFAOYSA-N	O=c1ccc2c(Cl)cc(Br)cc2[nH]1		O=c1ccc2c(Cl)cc(Br)cc2[nH]1	94275-80-6	7-Bromo-5-chloroquinolin-ol	258.502	-92.5709	77.4805	Organic compounds	Organoheterocyclic compounds	Quinolines and derivatives	Quinolones and derivatives			1.1309	-0.797787	2.2466	0.715231			0.822898	-0.46793	2.10918	0.70693
AFLWPAGYTPJSEY-CODXZCKSSA-N	O.CC12CCC(=O)C=C1CCC1C2C(O)CC2(C)C1CCC2(O)C(=O)COC(=O)CCC(O)=O	O	CC12CCC(=O)C=C1CCC1C2C(O)CC2(C)C1CCC2(O)C(=O)COC(=O)CCC(O)=O	83784-20-7	Pregn-\u200b4-\u200bene-\u200b3,\u200b20-\u200bdione, 21-\u200b(3-\u200bcarboxy-\u200b1-\u200boxopropoxy)\u200b-\u200b11,\u200b17-\u200bdihydroxy-\u200b, hydrate (1:1)\u200b, (11beta)\u200b-	462.539	118.179	110.698	Organic compounds	Lipids and lipid-like molecules	Steroids and steroid derivatives	Pregnane steroids			1.91104	-0.885881	2.69964	0.629702			1.00882	-2.34266	2.58002	0.731138
AFLXMTXOVRGNMC-UHFFFAOYSA-N	OC1=CC=CN=C1CN(CC1C=CC=CC=1)CCO		OC1=CC=CN=C1CN(CC1C=CC=CC=1)CCO	7254-17-3	MLS002693808	258.321	-41.6317	-79.4573	Organic compounds	Benzenoids	Benzene and substituted derivatives	Phenylmethylamines			1.60316	-0.49374	2.42366	0.69794			1.01219	-0.262629	2.28446	0.712866
AFLXUQUGROGEFA-UHFFFAOYSA-N	C[N+]([O-])(CCCl)CCCl		C[N+]([O-])(CCCl)CCCl	126-85-2	Nitrogen mustard N-oxide	172.055	19.5684	-105.917	Organic compounds	Organic nitrogen compounds	Organonitrogen compounds	Nitrogen mustard compounds			0.677905	-1.09662	2.2774	0.713333			0.714336	-0.780934	2.19454	0.660294
AFMIYEXCCPCEKD-UHFFFAOYSA-N	[CH][N+]([O-])=O		C[N+]([O-])=O	19527-13-0	Methylene, nitro-	61.04	184.41	-39.557	Organic compounds	Organic 1,3-dipolar compounds	Allyl-type 1,3-dipolar organic compounds	Organic nitro compounds			1.48455	0.00403928	2.59415	0.696944			0.538372	-2.12479	2.1629	0.678571
AFMLVQPDSTZQOF-UHFFFAOYSA-N	COC1C=C2OCC(=O)N(O)C2=CC=1		COC1C=C2OCC(=O)N(O)C2=CC=1	69884-05-5	2H-1,4-Benzoxazin-3(4H)-one,4-hydroxy-7-methoxy	195.174	-38.8788	103.053	Organic compounds	Organoheterocyclic compounds	Benzoxazines	Benzoxazinones			1.74487	0.0312513	2.55373	0.705387			1.07208	-0.79761	2.33144	0.693787
AFMPMSCZPVNPEM-UHFFFAOYSA-N	N#CC1=CC=CC=C1Br		N#CC1=CC=CC=C1Br	2042-37-7	Benzonitrile, 2-bromo-	182.02	-84.3207	-21.3606	Organic compounds	Benzenoids	Benzene and substituted derivatives	Benzonitriles			0.966425	-0.334079	2.21808	0.680304			0.548361	-0.62909	1.85819	0.667891
AFMVESZOYKHDBJ-UHFFFAOYSA-N	OC1C2=CC=CC=C2C2=CC=CC=C21		OC1C2=CC=CC=C2C2=CC=CC=C21	1689-64-1	Fluoren-9-ol	182.222	-17.7767	72.3744	Organic compounds	Benzenoids	Fluorenes				1.45551	-0.118504	2.2763	0.682033			1.11454	-0.414146	2.18094	0.664115
AFMXFPNYAXEBFM-UHFFFAOYSA-N	CC1(C)CCC(COC)C2C31CC(CC3)C2(C)C		CC1(C)CCC(COC)C2C31CC(CC3)C2(C)C	93777-35-6	8-(Methoxymethyl)-1,1,5,5-tetramethyloctahydro-2H-2,4a-methanonaphthalene	250.426	108.526	86.0918	Organic compounds	Lipids and lipid-like molecules	Prenol lipids	Monoterpenoids			1.92508	-2.4681	2.56323	0.782517			0.684052	-3.29548	2.31335	0.798151
AFMXNPUMXZCVGU-CWNVBEKCSA-N	CC12CCC(=O)C=C1CCC1C2C(O)CC2(C)C1CCC2(O)C(=O)COS(C)(=O)=O		CC12CCC(=O)C=C1CCC1C2C(O)CC2(C)C1CCC2(O)C(=O)COS(C)(=O)=O	6677-96-9	11,17-Dihydroxy-3,20-dioxopregn-4-en-21-yl methanesulfonatato	440.558	117.92	110.6	Organic compounds	Lipids and lipid-like molecules	Steroids and steroid derivatives	Pregnane steroids			1.55226	-2.57251	2.64029	0.63991			0.792262	-2.02978	2.55611	0.724024
AFMYMMXSQGUCBK-BNONGLCOSA-N	CC1C(C(O)=O)=C(OC)C2C#CC=CC#CC3NC4C(=CC(O)=C5C(O)=C6C(=O)C=CC(=O)C6=C(O)C5=4)C42OC413		CC1C(C(O)=O)=C(OC)C2C#CC=CC#CC3NC4C(=CC(O)=C5C(O)=C6C(=O)C=CC(=O)C6=C(O)C5=4)C42OC413	124412-57-3	(+)-Dynemicin A	537.48	-76.3421	136.122	Organic compounds	Benzenoids	Anthracenes	Anthraquinones			1.96254	-1.18617	2.76538	0.808421			0.944748	-3.76595	2.641	0.825211
AFNBMGLGYSGFEZ-UHFFFAOYSA-M	[K+].CC(=O)[S-]	[K+]	CC(=O)S	10387-40-3	Potassium thioacetate	76.12	76.4277	-70.4344	Organic compounds	Organic acids and derivatives	Carboxylic acids and derivatives				0.76621	-0.870339	2.20462	0.592308			0.480863	-1.0019	2.33011	0.544134
AFNHHLILYQEHKK-BDAKNGLRSA-N	OC1CN(Cc2c[nH]c3c(=O)[nH]c[n]c23)CC1CO		OC1CN(Cc2c[nH]c3c(=O)[nH]c[n]c23)CC1CO	548486-59-5	Ulodesine	264.285	38.8336	116.408	Organic compounds	Organoheterocyclic compounds	Pyrrolopyrimidines				1.8802	-0.0513161	2.67937	0.811999			1.14063	-0.347205	2.57065	0.809772
AFNKCFYOQROHMA-UHFFFAOYSA-N	CN(CC1C(Cl)=C(Cl)C=C(Cl)C=1O)CC(O)=O		CN(CC1C(Cl)=C(Cl)C=C(Cl)C=1O)CC(O)=O	5389-30-0	NSC45114	298.553	-87.5368	-1.30793	Organic compounds	Organic acids and derivatives	Carboxylic acids and derivatives	Amino acids, peptides, and analogues			1.25283	-0.458718	2.4695	0.701219			0.990941	-0.304795	2.25163	0.700231
AFNLZEWJLHEBLO-UHFFFAOYSA-N	OCCNCCC(F)(F)C(F)(F)C(F)(F)C(F)(F)C(F)(F)C(F)(F)C(F)(F)C(F)(F)F		OCCNCCC(F)(F)C(F)(F)C(F)(F)C(F)(F)C(F)(F)C(F)(F)C(F)(F)C(F)(F)F	27607-42-7	2-((3,3,4,4,5,5,6,6,7,7,8,8,9,9,10,10,10-Heptadecafluorodecyl)amino)ethanol	507.184	16.9977	-158.472	Organic compounds	Organic nitrogen compounds	Organonitrogen compounds	Amines			-0.690987	-0.958494	2.27028	0.497425			1.02519	-1.32176	2.02897	0.515394
AFNRMRFWCAJQGP-UHFFFAOYSA-N	CC1C=C2N=C(C)NC2=CC=1C		CC1C=C2N=C(C)NC2=CC=1C	3363-56-2	2,5,6-Trimethylbenzimidazole	160.22	-100.475	71.1791	Organic compounds	Organoheterocyclic compounds	Benzimidazoles				1.39942	-0.130083	2.21714	0.745463			0.676126	-0.687279	2.02096	0.757992
AFNTWHMDBNQQPX-RIKNOMPASA-N	O.NC(C(=O)N1C2CC2CC1C#N)C12CC3(O)CC(C1)CC(C2)C3	O	NC(C(=O)N1C2CC2CC1C#N)C12CC3(O)CC(C1)CC(C2)C3	945667-22-1	2-[Amino(3-hydroxyadamantan-1-yl)acetyl]-2-azabicyclo[3.1.0]hexane-3-carbonitrile--water (1/1)	315.417	59.8178	50.4844	Organic compounds	Organic acids and derivatives	Carboxylic acids and derivatives	Amino acids, peptides, and analogues			1.32075	-3.42203	2.5027	0.83749			0.576447	-3.36883	2.41259	0.833715
AFNWSIIBAYUTTL-UHFFFAOYSA-N	CCCCCCC#CCCCCCC		CCCCCCC#CCCCCCC	35216-11-6	7-Tetradecyne	194.362	109.845	-114.943	Organic compounds	Hydrocarbons	Unsaturated hydrocarbons	Acetylenes			2.17535	0.616516	2.74765	0.427068			1.58035	-0.245032	2.50528	0.428571
AFNXATANNDIXLG-UHFFFAOYSA-N	ClC1C=C(Cl)C(=CC=1)C(CN1C=NC=C1)SCC1C=CC(Cl)=CC=1		ClC1C=C(Cl)C(=CC=1)C(CN1C=NC=C1)SCC1C=CC(Cl)=CC=1	61318-90-9	Sulconazole	397.758	-68.3467	-101.548	Organic compounds	Benzenoids	Benzene and substituted derivatives	Halobenzenes			1.02885	-0.638324	2.55499	0.629769			0.843542	-0.897157	2.24131	0.620031
AFOGBLYPWJJVAL-UHFFFAOYSA-N	CCCCNC(=O)NS(=O)(=O)C1C=CC=CC=1		CCCCNC(=O)NS(=O)(=O)C1C=CC=CC=1	3149-00-6	Phenbutamide	256.327	-116.019	-54.6487	Organic compounds	Benzenoids	Benzene and substituted derivatives	Benzenesulfonamides			1.74606	0.317692	2.46291	0.573938			1.33167	-0.119727	2.48302	0.638382
AFOINDWJBKIFCC-UHFFFAOYSA-M	[Na+].O=N[N-]C1=CC(Cl)=CC=C1Cl	[Na+]	O=NNC1C=C(Cl)C=CC=1Cl	6259-27-4	Sodium 2,5-dichlorophenyl-N-nitrosoamide	191.017	-70.746	-40.1581	Organic compounds	Benzenoids	Benzene and substituted derivatives	Halobenzenes			0.998427	-0.730781	2.05241	0.657242			0.599808	-0.998415	1.84176	0.659448
AFOKZNPZDXHDHD-UHFFFAOYSA-N	CC(C)(O)CCc1c(=O)c2c(oc1C1=CC=C(O)C=C1O)c1C=CC(C)(C)Oc1cc2O		CC(C)(O)CCc1c(=O)c2c(oc1C1=CC=C(O)C=C1O)c1C=CC(C)(C)Oc1cc2O	62949-93-3	Oxydihydromorusi	438.476	-67.1869	125.931	Organic compounds	Phenylpropanoids and polyketides	Flavonoids	Flavones			2.12273	0.374903	2.88282	0.763783			1.38402	-0.672334	2.68052	0.791104
AFOSIXZFDONLBT-UHFFFAOYSA-N	C=CS(=O)(=O)C=C		C=CS(=O)(=O)C=C	77-77-0	Divinyl sulfone	118.157	41.3215	-81.8106	Organic compounds	Organosulfur compounds	Sulfonyls	Sulfones			1.51929	-0.0198373	2.46519	0.75225			1.11652	-0.817313	2.31131	0.758265
[truncated: 124,911 more rows]

## Sheet: S2-2
general chemical information												reproductive/developmental points of departure (PODrd)						general non-cancer points of departure (PODnc)
[truncated: 8,056 more rows]
